# Supplementary material for: Metabolic functions of Pseudomonas fluorescens strains from Populus deltoides depend on rhizosphere or endosphere isolation compartment
Source: Front Microbiol. 2015 Oct 14;6:1118. doi: 10.3389/fmicb.2015.01118 (PMC4604316; doi:10.3389/fmicb.2015.01118)
Supplement: Supplementary file 3 [file DataSheet1.XLSX]

## Sheet: CarbonSourceUtilDataAndTests
																								*Note: Tests are performed using only differentially utilized compounds (compounds used by all strains or no strains are omitted)
	Biolog PM1, PM2 results		Rhizosphere				Endosphere
	Compound	Compound Class	GM25	GM48	GM49	GM74	GM30	GM16	GM24	GM80	GM33	GM55	GM78	GM18	GM21	GM41	GM60	GM67	GM50	GM79	GM102			amino acid	rhizosphere	endosphere	negative	total		Expected	rhizosphere	endosphere	negative	total		Differences				DOF	18
	L-Phenylalanine	amino acid	+	+	+	+	+	+	+	+	+	+	+	+	+	+	+	+	+	+	+			L-Glutamine	4	13	2	19		L-Glutamine	1.77778	6	11.2222	19		2.77778	8.16667	7.57866		chi2 at 0.01	34.8053
	L-Aspartic acid	amino acid	+	+	+	+	+	+	+	+	+	+	+	+	+	+	+	+	+	+	+			L-Lysine	4	12	3	19		L-Lysine	1.77778	6	11.2222	19		2.77778	6	6.0242		Chi2	58.6126
	L-Proline	amino acid	+	+	+	+	+	+	+	+	+	+	+	+	+	+	+	+	+	+	+			L-Threonine	3	8	8	19		L-Threonine	1.77778	6	11.2222	19		0.840278	0.666667	0.925193		Decision	Reject H0, differences observed
	D-Alanine	amino acid	+	+	+	+	+	+	+	+	+	+	+	+	+	+	+	+	+	+	+			Glycine	3	4	12	19		Glycine	1.77778	6	11.2222	19		0.840278	0.666667	0.0539054		Bias:	rhizo
	L-Glutamic acid	amino acid	+	+	+	+	+	+	+	+	+	+	+	+	+	+	+	+	+	+	+			D-Aspartic acid	0	5	14	19		D-Aspartic acid	1.77778	6	11.2222	19		1.77778	0.166667	0.687569
	L-Asparagine	amino acid	+	+	+	+	+	+	+	+	+	+	+	+	+	+	+	+	+	+	+			L-Homoserine	2	3	14	19		L-Homoserine	1.77778	6	11.2222	19		0.0277778	1.5	0.687569
	L-Serine	amino acid	+	+	+	+	+	+	+	+	+	+	+	+	+	+	+	+	+	+	+			N-Acetyl-L-Glutamic acid	0	4	15	19		N-Acetyl-L-Glutamic acid	1.77778	6	11.2222	19		1.77778	0.666667	1.27173
	L-Alanine	amino acid	+	+	+	+	+	+	+	+	+	+	+	+	+	+	+	+	+	+	+			D-Serine	0	3	16	19		D-Serine	1.77778	6	11.2222	19		1.77778	1.5	2.0341
	L-Arginine	amino acid	+	+	+	+	+	+	+	+	+	+	+	+	+	+	+	+	+	+	+			D-Threonine	0	2	17	19		D-Threonine	1.77778	6	11.2222	19		1.77778	2.66667	2.9747
	L-Histidine	amino acid	+	+	+	+	+	+	+	+	+	+	+	+	+	+	+	+	+	+	+			Total	16	54	101	171		Total	16	54	101	171
	Hydroxy-L-Proline	amino acid	+	+	+	+	+	+	+	+	+	+	+	+	+	+	+	+	+	+	+
	L-Isoleucine	amino acid	+	+	+	+	+	+	+	+	+	+	+	+	+	+	+	+	+	+	+
	L-Leucine	amino acid	+	+	+	+	+	+	+	+	+	+	+	+	+	+	+	+	+	+	+
	L-Ornithine	amino acid	+	+	+	+	+	+	+	+	+	+	+	+	+	+	+	+	+	+	+
	L-Valine	amino acid	+	+	+	+	+	+	+	+	+	+	+	+	+	+	+	+	+	+	+
	L-Glutamine	amino acid	+	+	+	+	+	+	+	+	+	+	+	+	+	+	-	+	+	-	+
	L-Lysine	amino acid	+	+	+	+	+	-	+	-	+	+	+	+	+	+	+	+	+	+	-
	L-Threonine	amino acid	-	+	+	+	-	+	-	-	+	-	+	-	+	+	-	-	+	+	+
	Glycine	amino acid	-	+	+	+	-	-	-	-	+	-	+	-	+	-	-	+	-	-	-
	D-Aspartic acid	amino acid	-	-	-	-	-	-	-	-	-	+	+	+	-	-	-	-	+	-	+
	L-Homoserine	amino acid	-	+	+	-	-	-	-	-	-	-	-	-	-	+	-	-	-	+	+
	N-Acetyl-L-Glutamic acid	amino acid	-	-	-	-	+	+	+	+	-	-	-	-	-	-	-	-	-	-	-
	D-Serine	amino acid	-	-	-	-	-	-	-	-	-	+	+	-	-	+	-	-	-	-	-
	D-Threonine	amino acid	-	-	-	-	-	-	-	-	-	-	+	-	-	+	-	-	-	-	-
	L-Methionine	amino acid	-	-	-	-	-	-	-	-	-	-	-	-	-	-	-	-	-	-	-
																								aromatic	rhizosphere	endosphere	negative	total		Expected	rhizosphere	endosphere	negative	total		Differences				DOF	12
	4-Hydroxybenzoic acid	aromatic	+	+	+	+	+	+	+	+	+	+	+	+	+	+	+	+	+	+	+			Phenylethylamine	1	8	10	19		Phenylethylamine	0.333333	2.83333	15.8333	19		1.33333	9.42157	2.14912		chi2 at 0.01	26.217
	Phenylethylamine	aromatic	-	-	+	-	-	+	-	+	+	+	+	-	+	-	+	+	-	-	-			2-Hydroxybenzoic acid	0	4	15	19		2-Hydroxybenzoic acid	0.333333	2.83333	15.8333	19		0.333333	0.480392	0.0438596		Chi2	20.7901
	2-Hydroxybenzoic acid	aromatic	-	-	-	-	-	+	+	-	+	-	-	-	-	-	-	-	+	-	-			m-Hydroxyphenyl Acetic acid	1	2	16	19		m-Hydroxyphenyl Acetic acid	0.333333	2.83333	15.8333	19		1.33333	0.245098	0.00175439		Decision	Do not reject, no sig. differences
	m-Hydroxyphenyl Acetic acid	aromatic	-	-	+	-	-	+	-	-	-	-	+	-	-	-	-	-	-	-	-			Tyramine	0	1	18	19		Tyramine	0.333333	2.83333	15.8333	19		0.333333	1.18627	0.296491
	Tyramine	aromatic	-	-	-	-	-	-	-	-	-	-	-	-	-	-	-	-	-	-	+			p-Hydroxyphenyl Acetic acid	0	1	18	19		p-Hydroxyphenyl Acetic acid	0.333333	2.83333	15.8333	19		0.333333	1.18627	0.296491
	p-Hydroxyphenyl Acetic acid	aromatic	-	-	-	-	-	-	-	-	-	-	-	-	-	-	-	-	-	-	+			D,L-Octopamine	0	1	18	19		D,L-Octopamine	0.333333	2.83333	15.8333	19		0.333333	1.18627	0.296491
	D,L-Octopamine	aromatic	-	-	-	-	-	-	-	-	-	-	-	-	-	-	-	-	-	-	+			Total	2	17	95	114		Total	2	17	95	114
	Arbutin	aromatic	-	-	-	-	-	-	-	-	-	-	-	-	-	-	-	-	-	-	-
	Salicin	aromatic	-	-	-	-	-	-	-	-	-	-	-	-	-	-	-	-	-	-	-
	Amygdalin	aromatic	-	-	-	-	-	-	-	-	-	-	-	-	-	-	-	-	-	-	-
																								carboxylic acid	rhizosphere	endosphere	negative	total		Expected	rhizosphere	endosphere	negative	total		Differences				DOF	32
	Succinic acid	carboxylic acid	+	+	+	+	+	+	+	+	+	+	+	+	+	+	+	+	+	+	+			Acetic acid	4	14	1	19		Acetic acid	2.375	8.125	8.5	19		1.11184	4.24808	6.61765		chi2 at 0.01	53.4858
	L-Lactic acid	carboxylic acid	+	+	+	+	+	+	+	+	+	+	+	+	+	+	+	+	+	+	+			Bromosuccinic acid	3	15	1	19		Bromosuccinic acid	2.375	8.125	8.5	19		0.164474	5.81731	6.61765		Chi2	113.927
	DL-Malic acid	carboxylic acid	+	+	+	+	+	+	+	+	+	+	+	+	+	+	+	+	+	+	+			Propionic acid	4	14	1	19		Propionic acid	2.375	8.125	8.5	19		1.11184	4.24808	6.61765		Decision	Reject H0, differences observed
	a-Ketoglutaric acid	carboxylic acid	+	+	+	+	+	+	+	+	+	+	+	+	+	+	+	+	+	+	+			D-Malic acid	4	14	1	19		D-Malic acid	2.375	8.125	8.5	19		1.11184	4.24808	6.61765		Bias:	rhizo
	Citric acid	carboxylic acid	+	+	+	+	+	+	+	+	+	+	+	+	+	+	+	+	+	+	+			a-Keto-Valeric acid	3	11	5	19		a-Keto-Valeric acid	2.375	8.125	8.5	19		0.164474	1.01731	1.44118
	Fumaric acid	carboxylic acid	+	+	+	+	+	+	+	+	+	+	+	+	+	+	+	+	+	+	+			Citramalic acid	4	10	5	19		Citramalic acid	2.375	8.125	8.5	19		1.11184	0.432692	1.44118
	L-Malic acid	carboxylic acid	+	+	+	+	+	+	+	+	+	+	+	+	+	+	+	+	+	+	+			Formic acid	3	9	7	19		Formic acid	2.375	8.125	8.5	19		0.164474	0.0942308	0.264706
	Pyruvic acid	carboxylic acid	+	+	+	+	+	+	+	+	+	+	+	+	+	+	+	+	+	+	+			a-Hydroxybutyric acid	2	10	7	19		a-Hydroxybutyric acid	2.375	8.125	8.5	19		0.0592105	0.432692	0.264706
	b-Hydroxybutyric acid	carboxylic acid	+	+	+	+	+	+	+	+	+	+	+	+	+	+	+	+	+	+	+			Citraconic acid	4	8	7	19		Citraconic acid	2.375	8.125	8.5	19		1.11184	0.00192308	0.264706
	Malonic acid	carboxylic acid	+	+	+	+	+	+	+	+	+	+	+	+	+	+	+	+	+	+	+			Succinamic acid	1	5	13	19		Succinamic acid	2.375	8.125	8.5	19		0.796053	1.20192	2.38235
	L-Pyroglutamic acid	carboxylic acid	+	+	+	+	+	+	+	+	+	+	+	+	+	+	+	+	+	+	+			a-Ketobutyric acid	1	5	13	19		a-Ketobutyric acid	2.375	8.125	8.5	19		0.796053	1.20192	2.38235
	D,L-Carnitine	carboxylic acid	+	+	+	+	+	+	+	+	+	+	+	+	+	+	+	+	+	+	+			Mono-Methylsuccinate	1	5	13	19		Mono-Methylsuccinate	2.375	8.125	8.5	19		0.796053	1.20192	2.38235
	g-Amino-N-Butyric acid	carboxylic acid	+	+	+	+	+	+	+	+	+	+	+	+	+	+	+	+	+	+	+			Itaconic acid	1	5	13	19		Itaconic acid	2.375	8.125	8.5	19		0.796053	1.20192	2.38235
	Acetic acid	carboxylic acid	+	+	+	+	+	+	+	+	+	+	+	+	+	+	+	+	+	-	+			Tricarballylic acid	1	2	16	19		Tricarballylic acid	2.375	8.125	8.5	19		0.796053	4.61731	6.61765
	Bromosuccinic acid	carboxylic acid	-	+	+	+	+	+	+	+	+	+	+	+	+	+	+	+	+	+	+			Acetoacetic acid	1	2	16	19		Acetoacetic acid	2.375	8.125	8.5	19		0.796053	4.61731	6.61765
	Propionic acid	carboxylic acid	+	+	+	+	+	+	+	+	+	+	+	+	+	+	+	+	+	-	+			Glycolic acid	1	1	17	19		Glycolic acid	2.375	8.125	8.5	19		0.796053	6.24808	8.5
	D-Malic acid	carboxylic acid	+	+	+	+	+	+	+	+	+	+	+	+	+	+	-	+	+	+	+			Total	38	130	136	304		Total	38	130	136	304
	a-Keto-Valeric acid	carboxylic acid	-	+	+	+	-	-	-	+	+	-	+	+	+	+	+	+	+	+	+
	Citramalic acid	carboxylic acid	+	+	+	+	-	+	-	+	+	+	+	+	-	+	+	-	+	-	+
	Formic acid	carboxylic acid	-	+	+	+	-	-	-	-	+	+	+	+	+	+	+	+	-	-	+
	a-Hydroxybutyric acid	carboxylic acid	-	-	+	+	-	-	-	-	+	-	+	+	+	+	+	+	+	+	+
	Citraconic acid	carboxylic acid	+	+	+	+	-	-	-	+	+	-	+	+	-	+	+	-	+	-	+
	Succinamic acid	carboxylic acid	-	+	-	-	-	-	-	-	+	-	+	-	-	+	-	+	+	-	-
	a-Ketobutyric acid	carboxylic acid	-	-	+	-	-	-	-	-	+	-	+	-	+	+	-	+	-	-	-
	Mono-Methylsuccinate	carboxylic acid	-	+	-	-	+	-	-	-	-	-	+	-	-	+	-	+	+	-	-
	Itaconic acid	carboxylic acid	-	-	-	+	-	-	-	-	+	-	+	-	-	+	-	-	-	+	+
	Tricarballylic acid	carboxylic acid	-	-	+	-	-	+	-	-	-	+	-	-	-	-	-	-	-	-	-
	Acetoacetic acid	carboxylic acid	-	-	-	+	-	-	-	-	-	-	+	-	-	-	-	+	-	-	-
	Glycolic acid	carboxylic acid	-	+	-	-	-	-	-	-	-	-	-	-	-	+	-	-	-	-	-
	g-Hydroxybutyric acid	carboxylic acid	-	-	-	-	-	-	-	-	-	-	-	-	-	-	-	-	-	-	-
	Oxalic acid	carboxylic acid	-	-	-	-	-	-	-	-	-	-	-	-	-	-	-	-	-	-	-
	Oxalomalic acid	carboxylic acid	-	-	-	-	-	-	-	-	-	-	-	-	-	-	-	-	-	-	-
	a-Hydroxyglutaric acid-g-Lactone	carboxylic acid	-	-	-	-	-	-	-	-	-	-	-	-	-	-	-	-	-	-	-
	Glyoxylic acid	carboxylic acid	-	-	-	-	-	-	-	-	-	-	-	-	-	-	-	-	-	-	-
																								disaccharide	rhizosphere	endosphere	negative	total		Expected	rhizosphere	endosphere	negative	total		Differences				DOF	6
	D-Trehalose	disaccharide	-	+	+	-	-	+	+	-	-	-	-	+	-	+	+	+	+	+	+			D-Trehalose	2	9	8	19		D-Trehalose	1	5.66667	12.3333	19		1	1.96078	1.52252		chi2 at 0.01	16.8119
	Sucrose	disaccharide	-	+	-	-	-	+	+	-	-	-	-	+	-	+	-	-	+	+	+			Sucrose	1	7	11	19		Sucrose	1	5.66667	12.3333	19		0	0.313725	0.144144		Chi2	12.3879
	3-O-b-D-Galactopyranosyl-D-Arabinose	disaccharide	-	-	-	-	-	-	-	-	-	-	-	-	-	-	-	+	-	-	-			3-O-b-D-Galactopyranosyl-D-Arabinose	0	1	18	19		3-O-b-D-Galactopyranosyl-D-Arabinose	1	5.66667	12.3333	19		1	3.84314	2.6036		Decision	Do not reject, no sig. differences
	Maltose	disaccharide	-	-	-	-	-	-	-	-	-	-	-	-	-	-	-	-	-	-	-			Total	3	17	37	57		Total	3	17	37	57
	D-Melibiose	disaccharide	-	-	-	-	-	-	-	-	-	-	-	-	-	-	-	-	-	-	-
	Lactulose	disaccharide	-	-	-	-	-	-	-	-	-	-	-	-	-	-	-	-	-	-	-
	D-Cellobiose	disaccharide	-	-	-	-	-	-	-	-	-	-	-	-	-	-	-	-	-	-	-
	Gentiobiose	disaccharide	-	-	-	-	-	-	-	-	-	-	-	-	-	-	-	-	-	-	-
	Palatinose	disaccharide	-	-	-	-	-	-	-	-	-	-	-	-	-	-	-	-	-	-	-
	Turanose	disaccharide	-	-	-	-	-	-	-	-	-	-	-	-	-	-	-	-	-	-	-
	Melibionic acid	disaccharide	-	-	-	-	-	-	-	-	-	-	-	-	-	-	-	-	-	-	-
	a-D-Lactose	disaccharide	-	-	-	-	-	-	-	-	-	-	-	-	-	-	-	-	-	-	-
																								miscellaneous	rhizosphere	endosphere	negative	total		Expected	rhizosphere	endosphere	negative	total		Differences				DOF	14
	d-Amino Valeric acid	fatty acid	+	+	+	+	+	+	+	+	+	+	+	+	+	+	+	+	+	+	+			L-Alaninamide	3	14	2	19		L-Alaninamide	1.14286	7.71429	10.1429	19		3.01786	5.12169	6.53722		chi2 at 0.01	29.1412
	Butyric acid	fatty acid	+	+	+	+	+	+	+	+	+	+	+	+	+	+	+	+	+	+	+			Methylpyruvate	3	12	4	19		Methylpyruvate	1.14286	7.71429	10.1429	19		3.01786	2.38095	3.72032		Chi2	53.6511
	Capric acid	fatty acid	+	+	+	+	+	+	+	+	+	+	+	+	+	+	+	+	+	+	+			Dihydroxyacetone	2	12	5	19		Dihydroxyacetone	1.14286	7.71429	10.1429	19		0.642857	2.38095	2.60765		Decision	Reject H0, differences observed
	Caproic acid	fatty acid	+	+	+	+	+	+	+	+	+	+	+	+	+	+	+	+	+	+	+			DL-a-Glycerol Phosphate	0	6	13	19		DL-a-Glycerol Phosphate	1.14286	7.71429	10.1429	19		1.14286	0.380952	0.804829		Bias:	endo
	Sorbic acid	fatty acid	+	+	+	+	+	+	+	+	+	+	+	+	+	+	+	+	+	+	+			3-Hydroxy-2-butanone	0	5	14	19		3-Hydroxy-2-butanone	1.14286	7.71429	10.1429	19		1.14286	0.955026	1.4668
	Sebacic acid	fatty acid	-	-	-	-	-	-	-	-	-	-	+	-	-	-	-	-	-	-	-			1,2-Propanediol	0	4	15	19		1,2-Propanediol	1.14286	7.71429	10.1429	19		1.14286	1.78836	2.32596
	D-Galactonic acid-g-Lactone	miscellaneous	+	+	+	+	+	+	+	+	+	+	+	+	+	+	+	+	+	+	+			2,3-Butanedione	0	1	18	19		2,3-Butanedione	1.14286	7.71429	10.1429	19		1.14286	5.84392	6.08652
	2-Aminoethanol	miscellaneous	+	+	+	+	+	+	+	+	+	+	+	+	+	+	+	+	+	+	+			Total	8	54	71	133		Total	8	54	71	133
	Putrescine	miscellaneous	+	+	+	+	+	+	+	+	+	+	+	+	+	+	+	+	+	+	+
	L-Alaninamide	miscellaneous	-	+	+	+	+	+	+	-	+	+	+	+	+	+	+	+	+	+	+
	Methylpyruvate	miscellaneous	+	+	-	+	+	+	+	+	-	+	+	+	+	+	-	+	+	-	+
	Dihydroxyacetone	miscellaneous	-	-	+	+	+	+	+	+	+	-	+	+	+	+	-	+	+	-	+
	DL-a-Glycerol Phosphate	miscellaneous	-	-	-	-	-	-	-	-	-	-	-	+	-	+	-	+	+	+	+
	3-Hydroxy-2-butanone	miscellaneous	-	-	-	-	-	-	+	-	+	-	-	+	-	-	-	+	+	-	-
	1,2-Propanediol	miscellaneous	-	-	-	-	-	-	-	-	-	+	-	-	+	+	-	-	+	-	-
	2,3-Butanedione	miscellaneous	-	-	-	-	-	-	-	-	-	-	-	-	-	-	-	+	-	-	-
	2,3-Butanediol	miscellaneous	-	-	-	-	-	-	-	-	-	-	-	-	-	-	-	-	-	-	-
	Acetamide	miscellaneous	-	-	-	-	-	-	-	-	-	-	-	-	-	-	-	-	-	-	-
	sec-Butylamine	miscellaneous	-	-	-	-	-	-	-	-	-	-	-	-	-	-	-	-	-	-	-
	Sedoheptulosan	miscellaneous	-	-	-	-	-	-	-	-	-	-	-	-	-	-	-	-	-	-	-
	L-Galactonic acid-g-Lactone	miscellaneous	-	-	-	-	-	-	-	-	-	-	-	-	-	-	-	-	-	-	-
	D-Lactic acid Methyl Ester	miscellaneous	-	-	-	-	-	-	-	-	-	-	-	-	-	-	-	-	-	-	-
	D-Ribono-1,4-Lactone	miscellaneous	-	-	-	-	-	-	-	-	-	-	-	-	-	-	-	-	-	-	-			monosaccharide	rhizosphere	endosphere	negative	total		Expected	rhizosphere	endosphere	negative	total		Differences				DOF	10
	D-Galactose	monosaccharide	+	+	+	+	+	+	+	+	+	+	+	+	+	+	+	+	+	+	+			L-Arabinose	3	15	1	19		L-Arabinose	0.8	5.4	12.8	19		6.05	17.0667	10.8781		chi2 at 0.01	23.2093
	D-Ribose	monosaccharide	+	+	+	+	+	+	+	+	+	+	+	+	+	+	+	+	+	+	+			D-Xylose	1	6	12	19		D-Xylose	0.8	5.4	12.8	19		0.05	0.0666667	0.05		Chi2	47.6447
	D-Mannose	monosaccharide	+	+	+	+	+	+	+	+	+	+	+	+	+	+	+	+	+	+	+			L-Lyxose	0	3	16	19		L-Lyxose	0.8	5.4	12.8	19		0.8	1.06667	0.8		Decision	Reject H0, differences observed
	D-Fructose	monosaccharide	+	+	+	+	+	+	+	+	+	+	+	+	+	+	+	+	+	+	+			2-Deoxy-D-Ribose	0	2	17	19		2-Deoxy-D-Ribose	0.8	5.4	12.8	19		0.8	2.14074	1.37812		Bias:	endo
	a-D-Glucose	monosaccharide	+	+	+	+	+	+	+	+	+	+	+	+	+	+	+	+	+	+	+			Glucuronamide	0	1	18	19		Glucuronamide	0.8	5.4	12.8	19		0.8	3.58519	2.1125
	L-Arabinose	monosaccharide	+	+	-	+	+	+	+	+	+	+	+	+	+	+	+	+	+	+	+			Total	4	27	64	95		Total	4	27	64	95
	D-Xylose	monosaccharide	+	-	-	-	-	+	+	-	-	-	+	+	-	-	+	+	-	-	-
	L-Lyxose	monosaccharide	-	-	-	-	-	-	-	-	-	-	+	-	-	-	+	+	-	-	-
	2-Deoxy-D-Ribose	monosaccharide	-	-	-	-	-	+	+	-	-	-	-	-	-	-	-	-	-	-	-
	Glucuronamide	monosaccharide	-	-	-	-	-	-	-	-	-	-	-	-	+	-	-	-	-	-	-
	L-Fucose	monosaccharide	-	-	-	-	-	-	-	-	-	-	-	-	-	-	-	-	-	-	-
	L-Rhamnose	monosaccharide	-	-	-	-	-	-	-	-	-	-	-	-	-	-	-	-	-	-	-
	N-Acetyl-D-Mannosamine	monosaccharide	-	-	-	-	-	-	-	-	-	-	-	-	-	-	-	-	-	-	-
	D-Psicose	monosaccharide	-	-	-	-	-	-	-	-	-	-	-	-	-	-	-	-	-	-	-
	N-Acetyl-D-Galactosamine	monosaccharide	-	-	-	-	-	-	-	-	-	-	-	-	-	-	-	-	-	-	-
	b-D-Allose	monosaccharide	-	-	-	-	-	-	-	-	-	-	-	-	-	-	-	-	-	-	-
	D-Arabinose	monosaccharide	-	-	-	-	-	-	-	-	-	-	-	-	-	-	-	-	-	-	-
	D-Fucose	monosaccharide	-	-	-	-	-	-	-	-	-	-	-	-	-	-	-	-	-	-	-
	L-Glucose	monosaccharide	-	-	-	-	-	-	-	-	-	-	-	-	-	-	-	-	-	-	-
	L-Sorbose	monosaccharide	-	-	-	-	-	-	-	-	-	-	-	-	-	-	-	-	-	-	-
	D-Tagatose	monosaccharide	-	-	-	-	-	-	-	-	-	-	-	-	-	-	-	-	-	-	-
	Adenosine	nucleoside	+	-	-	-	+	+	+	+	-	+	-	+	-	+	+	+	+	+	+
	Uridine	nucleoside	+	-	-	-	+	+	+	+	-	+	-	+	-	+	+	+	+	+	+
	Inosine	nucleoside	+	-	-	-	+	+	+	+	-	+	-	+	-	+	+	+	+	+	+
	Thymidine	nucleoside	-	-	-	-	-	-	-	-	-	-	-	-	-	-	-	-	-	-	-
	2`-Deoxyadenosine	nucleoside	-	-	-	-	-	-	-	-	-	-	-	-	-	-	-	-	-	-	-			nucleoside	rhizosphere	endosphere	negative	total		Expected	rhizosphere	endosphere	negative	total		Differences				DOF	6
	Ala-Gly	peptide	+	+	+	+	+	+	+	+	+	+	+	+	+	+	+	+	+	+	+			Adenosine	1	12	6	19		Adenosine	0.75	9	9.25	19		0.0833333	1	1.14189		chi2 at 0.01	16.8119
	Gly-Glu	peptide	+	-	+	+	+	+	+	-	+	-	+	+	-	+	+	+	+	-	+			Uridine	1	12	6	19		Uridine	0.75	9	9.25	19		0.0833333	1	1.14189		Chi2	54.342
	Gly-Pro	peptide	+	-	+	-	+	+	-	-	-	-	+	-	-	+	+	+	+	-	+			Inosine	1	12	6	19		Inosine	0.75	9	9.25	19		0.0833333	1	1.14189		Decision	Reject H0, differences observed
	Gly-Asp	peptide	-	-	-	-	-	-	-	-	-	-	+	-	-	+	-	-	-	-	-			Thymidine	0	0	19	19		Thymidine	0.75	9	9.25	19		0.75	9	10.277		Bias:	endo
	Gelatin	peptide	-	-	-	-	-	-	-	-	-	-	-	-	-	-	-	-	-	-	-			Total	3	36	37	76		Total	3	36	37	76
	Dextrin	polysaccharide	-	-	-	-	-	-	-	-	-	-	-	-	-	-	-	+	-	-	-
	Maltotriose	polysaccharide	-	-	-	-	-	-	-	-	-	-	-	-	-	-	-	-	-	-	-			peptide	rhizosphere	endosphere	negative	total		Expected	rhizosphere	endosphere	negative	total		Differences				DOF	6
	Chondroitin Sulfate C	polysaccharide	-	-	-	-	-	-	-	-	-	-	-	-	-	-	-	-	-	-	-			Gly-Glu	3	11	5	19		Gly-Glu	1.25	5.5	12.25	19		2.45	5.5	4.29082		chi2 at 0.01	16.8119
	b-Cyclodextrin	polysaccharide	-	-	-	-	-	-	-	-	-	-	-	-	-	-	-	-	-	-	-			Gly-Pro	2	8	9	19		Gly-Pro	1.25	5.5	12.25	19		0.45	1.13636	0.862245		Chi2	27.6393
	g-Cyclodextrin	polysaccharide	-	-	-	-	-	-	-	-	-	-	-	-	-	-	-	-	-	-	-			Gly-Asp	0	2	17	19		Gly-Asp	1.25	5.5	12.25	19		1.25	2.22727	1.84184		Decision	Reject H0, differences observed
	Glycogen	polysaccharide	-	-	-	-	-	-	-	-	-	-	-	-	-	-	-	-	-	-	-			Dextrin	0	1	18	19		Dextrin	1.25	5.5	12.25	19		1.25	3.68182	2.69898		Bias:	endo
	Inulin	polysaccharide	-	-	-	-	-	-	-	-	-	-	-	-	-	-	-	-	-	-	-			Total	5	22	49	76		Total	5	22	49	76
	Laminarin	polysaccharide	-	-	-	-	-	-	-	-	-	-	-	-	-	-	-	-	-	-	-
	Mannan	polysaccharide	-	-	-	-	-	-	-	-	-	-	-	-	-	-	-	-	-	-	-
	Pectin	polysaccharide	-	-	-	-	-	-	-	-	-	-	-	-	-	-	-	-	-	-	-
	D-Melezitose	polysaccharide	-	-	-	-	-	-	-	-	-	-	-	-	-	-	-	-	-	-	-
	D-Raffinose	polysaccharide	-	-	-	-	-	-	-	-	-	-	-	-	-	-	-	-	-	-	-
	Stachyose	polysaccharide	-	-	-	-	-	-	-	-	-	-	-	-	-	-	-	-	-	-	-
	a-Cyclodextrin	polysaccharide	-	-	-	-	-	-	-	-	-	-	-	-	-	-	-	-	-	-	-
	D-Glucosamine	substituted monosaccharide	+	+	+	+	+	+	+	+	+	+	+	+	-	+	+	+	+	+	+			substituted monosaccharide	rhizosphere	endosphere	negative	total		Expected	rhizosphere	endosphere	negative	total		Differences				DOF	6
	N-Acetyl-D-Glucosamine	substituted monosaccharide	+	+	+	-	+	+	+	+	+	+	-	+	-	+	-	+	+	-	+			D-Glucosamine	4	14	1	19		D-Glucosamine	2.33333	8.66667	8	19		1.19048	3.28205	6.125		chi2 at 0.01	16.8119
	3-Methylglucose	substituted monosaccharide	-	-	-	-	-	-	-	-	-	-	-	-	-	-	-	-	-	-	+			N-Acetyl-D-Glucosamine	3	11	5	19		N-Acetyl-D-Glucosamine	2.33333	8.66667	8	19		0.190476	0.628205	1.125		Chi2	61.4861
	D-Glucose-6-Phosphate	substituted monosaccharide	-	-	-	-	-	-	-	-	-	-	-	-	-	-	-	-	-	-	-			3-Methylglucose	0	1	18	19		3-Methylglucose	2.33333	8.66667	8	19		2.33333	6.78205	12.5		Decision	Reject H0, differences observed
	D-Glucose-1-Phosphate	substituted monosaccharide	-	-	-	-	-	-	-	-	-	-	-	-	-	-	-	-	-	-	-			Total	7	26	24	57		Total	7	26	24	57						Bias:	rhizo
	D-Fructose-6-Phosphate	substituted monosaccharide	-	-	-	-	-	-	-	-	-	-	-	-	-	-	-	-	-	-	-
	b-Methyl-D-Glucoside	substituted monosaccharide	-	-	-	-	-	-	-	-	-	-	-	-	-	-	-	-	-	-	-
	b-Methyl-D-Galactoside	substituted monosaccharide	-	-	-	-	-	-	-	-	-	-	-	-	-	-	-	-	-	-	-
	b-Methyl-D-Xyloside	substituted monosaccharide	-	-	-	-	-	-	-	-	-	-	-	-	-	-	-	-	-	-	-
	a-Methyl-D-Galactoside	substituted monosaccharide	-	-	-	-	-	-	-	-	-	-	-	-	-	-	-	-	-	-	-
	a-Methyl-D-Glucoside	substituted monosaccharide	-	-	-	-	-	-	-	-	-	-	-	-	-	-	-	-	-	-	-
	a-Methyl-D-Mannoside	substituted monosaccharide	-	-	-	-	-	-	-	-	-	-	-	-	-	-	-	-	-	-	-
	D-Glucosaminic acid	sugar acid	+	+	+	+	+	+	+	+	+	+	+	+	+	+	+	+	+	+	+			sugar acid	rhizosphere	endosphere	negative	total		Expected	rhizosphere	endosphere	negative	total		Differences				DOF	12
	D-Saccharic acid	sugar acid	+	+	+	+	+	+	+	+	+	+	+	+	+	+	+	+	+	+	+			m-Tartaric acid	4	14	1	19		m-Tartaric acid	1.57143	9.42857	8	19		3.75325	2.21645	6.125		chi2 at 0.01	26.217
	D-Gluconic acid	sugar acid	+	+	+	+	+	+	+	+	+	+	+	+	+	+	+	+	+	+	+			Mucic acid	3	15	1	19		Mucic acid	1.57143	9.42857	8	19		1.2987	3.29221	6.125		Chi2	57.3258
	Quinic acid	sugar acid	+	+	+	+	+	+	+	+	+	+	+	+	+	+	+	+	+	+	+			L-Tartaric acid	3	11	5	19		L-Tartaric acid	1.57143	9.42857	8	19		1.2987	0.261905	1.125		Decision	Reject H0, differences observed
	m-Tartaric acid	sugar acid	+	+	+	+	+	+	+	+	+	+	+	-	+	+	+	+	+	+	+			D-Galacturonic acid	0	11	8	19		D-Galacturonic acid	1.57143	9.42857	8	19		1.57143	0.261905	0		Bias:	endo
	Mucic acid	sugar acid	-	+	+	+	+	+	+	+	+	+	+	+	+	+	+	+	+	+	+			D-Glucuronic acid	0	10	9	19		D-Glucuronic acid	1.57143	9.42857	8	19		1.57143	0.034632	0.125
	L-Tartaric acid	sugar acid	-	+	+	+	-	+	+	-	+	+	+	+	-	+	-	+	+	+	+			5-Keto-D-Gluconic acid	1	3	15	19		5-Keto-D-Gluconic acid	1.57143	9.42857	8	19		0.207792	4.38312	6.125
	D-Galacturonic acid	sugar acid	-	-	-	-	-	+	+	+	+	-	+	-	+	+	+	+	-	+	+			D-Tartaric acid	0	2	17	19		D-Tartaric acid	1.57143	9.42857	8	19		1.57143	5.85281	10.125
	D-Glucuronic acid	sugar acid	-	-	-	-	-	+	+	+	+	-	+	-	+	+	+	+	-	+	-			Total	11	66	56	133		Total	11	66	56	133		0
	5-Keto-D-Gluconic acid	sugar acid	-	-	-	+	-	-	-	-	-	+	+	-	-	-	-	-	+	-	-
	D-Tartaric acid	sugar acid	-	-	-	-	-	-	-	-	-	-	-	-	+	-	-	+	-	-	-
	N-Acetyl-Neuraminic acid	sugar acid	-	-	-	-	-	-	-	-	-	-	-	-	-	-	-	-	-	-	-
	b-Methyl-D-Glucuronic acid	sugar acid	-	-	-	-	-	-	-	-	-	-	-	-	-	-	-	-	-	-	-			sugar alcohol	rhizosphere	endosphere	negative	total		Expected	rhizosphere	endosphere	negative	total		Differences				DOF	6
	Glycerol	sugar alcohol	+	+	+	+	+	+	+	+	+	+	+	+	+	+	+	+	+	+	+			D-Mannitol	4	14	1	19		D-Mannitol	2.75	10.25	6	19		0.568182	1.37195	4.16667		chi2 at 0.01	16.8119
	D-Mannitol	sugar alcohol	+	+	+	+	+	+	+	+	+	+	+	+	-	+	+	+	+	+	+			D-Arabitol	4	14	1	19		D-Arabitol	2.75	10.25	6	19		0.568182	1.37195	4.16667		Chi2	29.5026
	D-Arabitol	sugar alcohol	+	+	+	+	+	+	+	+	+	+	+	+	-	+	+	+	+	+	+			m-Inositol	3	8	8	19		m-Inositol	2.75	10.25	6	19		0.0227273	0.493902	0.666667		Decision	Reject H0, differences observed
	m-Inositol	sugar alcohol	+	+	+	-	-	+	-	-	-	-	+	+	-	+	-	+	+	+	+			D-Sorbitol	0	5	14	19		D-Sorbitol	2.75	10.25	6	19		2.75	2.68902	10.6667		Bias:	rhizo
	D-Sorbitol	sugar alcohol	-	-	-	-	-	-	-	-	-	-	-	+	-	+	-	-	+	+	+			Total	11	41	24	76		Total	11	41	24	76
	N-Acetyl-D-Glucosaminitol	sugar alcohol	-	-	-	-	-	-	-	-	-	-	-	-	-	-	-	-	-	-	-
	Dulcitol	sugar alcohol	-	-	-	-	-	-	-	-	-	-	-	-	-	-	-	-	-	-	-
	L-Arabitol	sugar alcohol	-	-	-	-	-	-	-	-	-	-	-	-	-	-	-	-	-	-	-
	i-Erythritol	sugar alcohol	-	-	-	-	-	-	-	-	-	-	-	-	-	-	-	-	-	-	-
	D-Lactitol	sugar alcohol	-	-	-	-	-	-	-	-	-	-	-	-	-	-	-	-	-	-	-			tween	rhizosphere	endosphere	negative	total		Expected	rhizosphere	endosphere	negative	total		Differences				DOF	4
	Maltitol	sugar alcohol	-	-	-	-	-	-	-	-	-	-	-	-	-	-	-	-	-	-	-			Tween 20	4	14	1	19		Tween 20	4	12.3333	2.66667	19		0	0.225225	1.04167		chi2 at 0.01	13.2767
	Xylitol	sugar alcohol	-	-	-	-	-	-	-	-	-	-	-	-	-	-	-	-	-	-	-			Tween 40	4	12	3	19		Tween 40	4	12.3333	2.66667	19		0	0.00900901	0.0416667		Chi2	2.12838
	Adonitol	sugar alcohol	-	-	-	-	-	-	-	-	-	-	-	-	-	-	-	-	-	-	-			Tween 80	4	11	4	19		Tween 80	4	12.3333	2.66667	19		0	0.144144	0.666667		Decision	Do not reject, no sig. differences
	Tween 20	tween	+	+	+	+	+	+	+	+	+	+	+	+	+	+	+	+	-	+	+			Total	12	37	8	57		Total	12	37	8	57
	Tween 40	tween	+	+	+	+	+	+	+	+	+	+	+	+	+	-	-	+	-	+	+
	Tween 80	tween	+	+	+	+	+	+	+	+	+	+	+	-	+	-	-	+	-	+	+

## Sheet: CarbonSourcePredictions
	KBase Model Predictions	Rhizosphere				Endosphere
	Carbon Source	GM25	GM48	GM49	GM74	GM102	GM16	GM18	GM21	GM24	GM30	GM33	GM41	GM50	GM55	GM60	GM67	GM78	GM79	GM80
	1,2-Propanediol	-	-	-	-	-	-	-	-	-	-	-	-	-	-	-	-	-	-	-
	2,3-Butanediol	-	-	-	-	-	-	-	-	-	-	-	-	-	-	-	-	-	-	-
	2`-Deoxyadenosine	-	-	-	-	-	-	-	-	-	-	-	-	-	-	-	-	-	-	-
	2-Aminoethanol	+	+	+	+	+	+	+	+	+	+	+	+	+	+	+	+	+	+	+
	2-Deoxy-D-Ribose	-	-	-	-	-	-	-	-	-	-	-	-	-	-	-	-	-	-	-
	2-Hydroxybenzoic acid	-	-	-	-	-	-	-	-	-	-	-	-	-	-	-	-	-	-	-
	3-Hydroxy-2-butanone	-	-	-	-	-	-	-	-	-	-	-	-	-	-	-	-	-	-	-
	4-Hydroxybenzoic acid	-	-	-	-	-	-	-	-	-	-	-	-	-	-	-	-	-	-	-
	Acetamide	-	-	-	-	-	-	-	-	-	-	-	-	-	-	-	-	-	-	-
	Acetic acid	+	+	+	+	+	-	+	+	+	+	+	+	+	+	+	+	-	+	+
	Acetoacetic acid	+	-	-	+	-	+	+	+	+	+	+	+	+	+	+	+	-	+	+
	Adenosine	+	-	+	-	+	-	+	-	+	+	-	-	+	+	+	-	+	+	-
	a-D-Glucose	+	+	+	+	+	+	+	+	+	+	+	+	+	+	+	+	+	+	+
	a-D-Lactose	-	-	-	-	-	-	-	-	-	-	-	-	-	-	-	-	-	-	-
	Adonitol	-	-	-	-	-	-	-	-	-	-	-	-	-	-	-	-	-	-	-
	a-Hydroxybutyric acid	-	-	-	-	-	-	-	-	-	-	-	-	-	-	-	-	-	-	-
	a-Ketobutyric acid	-	+	-	-	-	-	-	+	-	-	+	-	-	-	+	-	-	-	-
	a-Ketoglutaric acid	+	+	+	+	+	-	+	+	+	+	+	+	+	+	+	+	+	+	+
	a-Keto-Valeric acid	-	-	-	-	-	-	-	-	-	-	-	-	-	-	-	-	-	-	-
	Ala-Gly	+	+	+	+	+	+	+	+	+	+	+	+	+	+	+	+	+	+	+
	a-Methyl-D-Galactoside	-	-	-	-	-	-	-	-	-	-	-	-	-	-	-	-	-	-	-
	a-Methyl-D-Glucoside	-	-	-	-	-	-	-	-	-	-	-	-	-	-	-	-	-	-	-
	Amygdalin	-	-	-	-	-	-	-	-	-	-	-	-	-	-	-	-	-	-	-
	Arbutin	-	-	-	-	-	-	-	-	-	-	-	-	-	-	-	-	-	-	-
	b-D-Allose	-	-	-	-	-	-	-	-	-	-	-	-	-	-	-	-	-	-	-
	b-Hydroxybutyric acid	+	+	+	-	+	-	+	+	+	+	+	+	+	+	+	+	+	+	+
	b-Methyl-D-Galactoside	-	-	-	-	-	-	-	-	-	-	-	-	-	-	-	-	-	-	-
	b-Methyl-D-Glucoside	-	-	-	-	-	-	-	-	-	-	-	-	-	-	-	-	-	-	-
	Butyric acid	-	-	-	-	-	-	-	-	-	-	-	-	-	-	-	-	-	-	-
	Capric acid	-	-	-	-	-	-	-	-	-	-	-	-	-	-	-	-	-	-	-
	Caproic acid	-	-	-	-	-	-	-	-	-	-	-	-	-	-	-	-	-	-	-
	Chondroitin Sulfate C	-	-	-	-	-	-	-	-	-	-	-	-	-	-	-	-	-	-	-
	Citraconic acid	-	-	-	-	-	-	-	-	-	-	-	-	-	-	-	-	-	-	-
	Citramalic acid	-	-	-	-	-	-	-	-	-	-	-	-	-	-	-	-	-	-	-
	Citric acid	+	+	-	+	-	-	-	+	+	-	+	-	-	-	+	-	+	+	-
	D,L-Carnitine	-	-	-	-	-	-	-	-	-	-	-	-	-	-	-	-	-	-	-
	D,L-Octopamine	-	-	-	-	-	-	-	-	-	-	-	-	-	-	-	-	-	-	-
	D-Alanine	+	+	+	+	+	+	+	+	+	+	+	+	+	+	+	+	+	+	+
	d-Amino Valeric acid	-	-	-	-	-	-	-	-	-	-	-	-	-	-	-	-	-	-	-
	D-Arabinose	-	-	-	-	-	-	-	-	-	-	-	-	-	-	-	-	-	-	-
	D-Arabitol	-	-	-	-	-	-	-	-	-	-	-	-	-	-	-	-	-	-	-
	D-Aspartic acid	-	-	-	-	-	-	-	-	-	-	-	-	-	-	-	-	-	-	-
	D-Cellobiose	-	-	-	-	-	-	-	-	-	-	-	-	-	-	-	-	-	-	-
	Dextrin	-	-	-	-	-	-	-	-	-	-	-	-	-	-	-	-	-	-	-
	D-Fructose	+	+	+	+	+	+	+	+	+	+	+	+	+	+	+	+	+	+	+
	D-Fructose-6-Phosphate	-	-	-	-	-	-	-	-	-	-	-	-	-	-	-	-	-	-	-
	D-Fucose	-	-	-	-	-	-	-	-	-	-	-	-	-	-	-	-	-	-	-
	D-Galactonic acid-g-Lactone	-	-	-	-	-	-	-	-	-	-	-	-	-	-	-	-	-	-	-
	D-Galactose	-	-	-	-	-	-	-	-	-	-	-	-	-	-	-	-	-	-	-
	D-Galacturonic acid	-	-	-	-	-	-	-	-	-	-	-	-	-	-	-	-	-	-	-
	D-Gluconic acid	+	+	+	+	+	-	+	+	+	+	+	+	+	+	+	+	+	+	+
	D-Glucosamine	+	+	+	+	+	+	+	+	+	+	+	+	+	+	+	+	+	+	+
	D-Glucosaminic acid	-	-	-	-	-	-	-	-	-	-	-	-	-	-	-	-	-	-	-
	D-Glucose-1-Phosphate	-	-	-	-	-	-	-	-	-	-	-	-	-	-	-	-	-	-	-
	D-Glucose-6-Phosphate	-	-	-	-	-	-	-	-	-	-	-	-	-	-	-	-	-	-	-
	D-Glucuronic acid	-	-	-	-	-	-	-	-	-	-	-	-	-	-	-	-	-	-	-
	Dihydroxyacetone	-	-	-	+	-	-	-	-	+	-	+	-	-	-	-	-	-	-	-
	D-Lactitol	-	-	-	-	-	-	-	-	-	-	-	-	-	-	-	-	-	-	-
	DL-a-Glycerol Phosphate	+	+	+	+	+	+	+	+	+	+	+	+	+	+	+	+	+	+	+
	DL-Malic acid	+	+	+	+	+	+	+	+	+	+	+	+	+	+	+	+	+	+	+
	D-Malic acid	-	+	+	+	+	-	+	-	+	-	+	+	+	-	-	+	+	-	-
	D-Mannitol	+	+	+	+	+	-	+	-	+	+	+	+	+	+	+	+	+	+	-
	D-Mannose	+	+	+	+	+	+	+	+	+	+	+	+	+	+	+	+	+	+	+
	D-Melezitose	-	-	-	-	-	-	-	-	-	-	-	-	-	-	-	-	-	-	-
	D-Melibiose	-	-	-	-	-	-	-	-	-	-	-	-	-	-	-	-	-	-	-
	D-Psicose	-	-	-	-	-	-	-	-	-	-	-	-	-	-	-	-	-	-	-
	D-Raffinose	-	-	-	-	-	-	-	-	-	-	-	-	-	-	-	-	-	-	-
	D-Ribose	+	+	+	+	+	+	+	+	+	+	+	+	+	+	+	+	+	+	+
	D-Saccharic acid	+	+	+	+	+	+	+	+	+	+	+	+	+	+	+	+	+	+	+
	D-Serine	-	-	-	-	-	-	-	-	-	-	-	-	+	-	-	-	-	-	+
	D-Sorbitol	-	-	-	-	-	-	-	-	-	-	-	-	-	+	-	-	-	-	-
	D-Tagatose	-	-	-	-	-	-	-	-	-	-	-	-	-	-	-	-	-	-	-
	D-Tartaric acid	-	+	+	+	+	-	+	-	+	-	+	+	+	-	-	+	+	-	-
	D-Threonine	-	-	-	-	-	-	-	-	-	-	-	-	-	-	-	-	-	-	-
	D-Trehalose	-	+	+	-	+	+	+	-	+	-	-	+	-	+	+	-	+	-	-
	Dulcitol	-	-	-	-	-	-	-	-	-	-	-	-	-	-	-	-	-	-	-
	D-Xylose	+	-	-	-	-	+	+	-	+	-	-	-	-	-	-	-	-	-	-
	Formic acid	-	+	-	+	+	-	+	+	-	-	+	+	+	+	+	+	-	-	+
	Fumaric acid	+	+	+	+	+	+	+	+	+	+	+	+	+	+	+	+	+	+	+
	g-Amino-N-Butyric acid	+	+	+	+	+	-	+	+	+	+	+	+	+	+	+	+	+	+	+
	Gelatin	-	-	-	-	-	-	-	-	-	-	-	-	-	-	-	-	-	-	-
	Gentiobiose	-	-	-	-	-	-	-	-	-	-	-	-	-	-	-	-	-	-	-
	g-Hydroxybutyric acid	-	-	-	-	-	-	-	-	-	-	-	-	-	-	-	-	-	-	-
	Gly-Asp	+	+	+	+	+	+	+	+	+	+	+	+	+	+	+	+	+	+	+
	Glycerol	+	+	+	+	+	+	+	+	+	+	+	+	+	+	+	+	+	+	+
	Glycine	+	+	+	+	+	+	+	+	+	+	+	+	+	+	+	+	+	+	+
	Glycogen	-	-	-	-	-	-	-	-	-	-	-	-	-	-	-	-	-	-	-
	Glycolic acid	-	-	-	-	-	-	-	-	-	-	-	+	-	-	-	-	-	-	+
	Gly-Glu	+	+	+	+	+	+	+	+	+	+	+	+	+	+	+	+	+	+	+
	Glyoxylic acid	-	-	-	-	-	-	-	-	-	-	-	-	-	-	-	-	-	-	+
	Gly-Pro	+	+	+	+	+	+	+	+	+	+	+	+	+	+	+	+	+	+	+
	Hydroxy-L-Proline	-	-	-	-	-	-	-	-	-	-	-	-	-	-	-	-	-	-	-
	i-Erythritol	-	-	-	-	-	-	-	-	-	-	-	-	-	-	-	-	-	-	-
	Inosine	+	-	+	-	+	-	+	-	+	+	-	-	+	+	+	-	+	+	+
	Inulin	-	-	-	-	-	-	-	-	-	-	-	-	-	-	-	-	-	-	-
	Itaconic acid	-	-	-	-	-	-	-	-	-	-	-	-	-	-	-	-	-	-	-
	Lactulose	-	-	-	-	-	-	-	-	-	-	-	-	-	-	-	-	-	-	-
	L-Alanine	+	+	+	+	+	-	+	+	+	+	+	+	+	+	+	+	+	+	+
	Laminarin	-	-	-	-	-	-	-	-	-	-	-	-	-	-	-	-	-	-	-
	L-Arabinose	-	-	-	-	-	-	-	-	-	-	-	-	-	-	-	-	-	-	-
	L-Arabitol	-	-	-	-	-	-	-	-	-	-	-	-	-	-	-	-	-	-	-
	L-Arginine	+	+	+	+	+	+	+	+	+	+	+	+	+	+	+	+	+	+	+
	L-Asparagine	+	+	+	+	+	-	+	+	+	+	+	+	+	+	+	+	+	+	+
	L-Aspartic acid	+	+	+	+	+	+	+	+	+	+	+	+	+	+	+	+	+	+	+
	L-Fucose	-	-	-	-	-	-	-	-	-	-	-	-	-	-	-	-	-	-	-
	L-Glutamic acid	+	+	+	+	+	+	+	+	+	+	+	+	+	+	+	+	+	+	+
	L-Glutamine	+	+	+	+	+	+	+	+	+	+	+	+	+	+	+	+	+	+	+
	L-Histidine	+	+	+	+	+	+	-	+	+	+	+	+	+	+	+	+	+	+	+
	L-Homoserine	-	+	-	-	+	-	-	-	-	-	-	+	-	-	-	-	+	-	-
	L-Isoleucine	+	+	+	+	+	+	+	+	+	+	+	+	+	+	+	+	+	+	+
	L-Lactic acid	-	+	-	+	-	-	-	+	-	-	-	+	-	+	+	-	-	-	+
	L-Leucine	+	+	+	+	+	-	+	+	+	+	+	+	+	+	+	+	+	+	+
	L-Lysine	-	-	-	-	-	-	-	-	-	-	-	-	-	-	-	-	-	-	-
	L-Lyxose	-	-	-	-	-	-	-	-	-	-	-	-	-	-	-	-	-	-	-
	L-Malic acid	+	+	+	+	+	+	+	+	+	+	+	+	+	+	+	+	+	+	+
	L-Methionine	-	-	-	-	-	-	-	-	-	-	-	-	-	-	-	-	-	-	-
	L-Ornithine	+	+	+	+	+	+	+	+	+	+	+	+	+	+	+	+	+	+	+
	L-Phenylalanine	-	-	-	-	-	-	-	-	-	-	-	-	-	-	-	-	-	-	-
	L-Proline	+	+	+	+	+	+	+	+	+	+	+	+	+	+	+	+	+	+	+
	L-Pyroglutamic acid	-	-	-	-	-	-	-	-	-	-	-	-	-	-	-	-	-	-	-
	L-Rhamnose	-	-	-	-	-	-	-	-	-	-	-	-	-	-	-	-	-	-	-
	L-Serine	+	+	+	+	+	+	+	+	+	+	+	+	+	+	+	+	+	+	+
	L-Sorbose	-	-	-	-	-	-	-	-	-	-	-	-	-	-	-	-	-	-	-
	L-Tartaric acid	-	+	+	+	+	-	+	-	+	-	+	+	+	-	-	+	+	-	-
	L-Threonine	-	+	+	+	+	-	-	+	-	-	+	+	-	-	-	+	+	-	+
	L-Valine	+	+	+	+	+	+	+	+	+	+	+	+	+	+	+	+	+	+	+
	Malonic acid	+	+	+	+	+	+	+	+	+	+	+	+	+	+	+	+	+	+	+
	Maltitol	-	-	-	-	-	-	-	-	-	-	-	-	-	-	-	-	-	-	-
	Maltose	-	+	+	-	+	-	+	-	+	-	-	+	-	+	+	-	+	-	-
	Maltotriose	-	-	-	-	-	-	-	-	-	-	-	-	-	-	-	-	-	-	-
	Mannan	-	-	-	-	-	-	-	-	-	-	-	-	-	-	-	-	-	-	-
	m-Inositol	-	-	-	-	-	-	-	-	-	-	-	-	-	-	-	-	-	-	-
	m-Tartaric acid	-	+	+	+	+	-	-	-	+	-	+	+	+	-	-	+	+	-	-
	Mucic acid	+	+	+	+	+	+	+	+	+	+	+	+	+	+	+	+	+	+	+
	N-Acetyl-D-Galactosamine	-	-	-	-	-	-	-	-	-	-	-	-	-	-	-	-	-	-	-
	N-Acetyl-D-Glucosamine	+	+	+	-	+	+	+	-	+	+	+	+	+	-	+	-	-	+	-
	N-Acetyl-D-Mannosamine	-	-	-	-	-	-	-	-	-	-	-	-	-	-	-	-	-	-	-
	N-Acetyl-L-Glutamic acid	-	-	-	-	-	-	-	-	+	+	-	-	-	-	-	-	-	+	+
	N-Acetyl-Neuraminic acid	-	-	-	-	-	-	-	-	-	-	-	-	-	-	-	-	-	-	-
	Oxalic acid	-	-	-	-	-	-	-	-	-	-	-	-	-	-	-	-	-	-	-
	Oxalomalic acid	-	-	-	-	-	-	-	-	-	-	-	-	-	-	-	-	-	-	-
	Palatinose	-	-	-	-	-	-	-	-	-	-	-	-	-	-	-	-	-	-	-
	Pectin	-	-	-	-	-	-	-	-	-	-	-	-	-	-	-	-	-	-	-
	Phenylethylamine	-	-	-	-	-	-	-	-	-	-	-	-	-	-	-	-	-	-	-
	p-Hydroxyphenyl Acetic acid	-	-	-	-	-	-	-	-	-	-	-	-	-	-	-	-	-	-	-
	Propionic acid	+	+	+	-	+	-	+	+	+	+	+	+	+	+	+	+	-	+	+
	Putrescine	-	-	+	-	+	-	-	-	-	-	-	-	-	-	-	-	-	-	-
	Pyruvic acid	+	+	+	+	+	-	+	+	+	+	+	+	+	+	+	+	+	+	+
	Quinic acid	-	-	-	-	-	-	-	-	-	-	-	-	-	-	-	-	-	-	-
	Salicin	-	-	-	-	-	-	-	-	-	-	-	-	-	-	-	-	-	-	-
	Sebacic acid	-	-	-	-	-	-	-	-	-	-	-	-	-	-	-	-	-	-	-
	sec-Butylamine	-	-	-	-	-	-	-	-	-	-	-	-	-	-	-	-	-	-	-
	Sorbic acid	-	-	-	-	-	-	-	-	-	-	-	-	-	-	-	-	-	-	-
	Stachyose	-	-	-	-	-	-	-	-	-	-	-	-	-	-	-	-	-	-	-
	Succinic acid	+	+	+	+	+	+	+	+	+	+	+	+	+	+	+	+	+	+	+
	Sucrose	-	-	-	-	-	+	-	-	-	-	-	-	-	-	-	-	-	-	-
	Thymidine	-	-	-	-	-	-	-	-	-	-	-	-	-	-	-	-	-	-	-
	Tricarballylic acid	-	+	-	-	-	-	-	-	-	-	-	-	+	-	-	-	-	-	-
	Tween 20	-	-	-	-	-	-	-	-	-	-	-	-	-	-	-	-	-	-	-
	Tween 80	-	-	-	-	-	-	-	-	-	-	-	-	-	-	-	-	-	-	-
	Tyramine	-	-	-	-	-	-	-	-	-	-	-	-	-	-	-	-	-	-	-
	Uridine	-	-	-	-	-	-	-	-	-	-	-	-	-	-	-	-	-	-	-
	Xylitol	-	-	-	-	-	-	-	-	-	-	-	-	-	-	-	-	-	-	-

## Sheet: CompoundMetaCycClassifications
	monosaccharide	substituted monosaccharide	disaccharide	polysaccharide	nucleoside	sugar acid	sugar alcohol	carboxylic acid	amino acid	aromatic	peptide	fatty acid	tween	miscellaneous
	2-Deoxy-D-Ribose	3-Methylglucose	3-O-b-D-Galactopyranosyl-D-Arabinose	Dextrin	Adenosine	5-Keto-D-Gluconic acid	D-Arabitol	Acetic acid	D-Alanine	2-Hydroxybenzoic acid	Ala-Gly	Butyric acid	Tween 20	1,2-Propanediol
	a-D-Glucose	D-Glucosamine	D-Trehalose	a-Cyclodextrin	Inosine	D-Galacturonic acid	D-Mannitol	Acetoacetic acid	D-Aspartic acid	4-Hydroxybenzoic acid	Gly-Asp	Capric acid	Tween 40	2,3-Butanedione
	D-Fructose	N-Acetyl-D-Glucosamine	Sucrose	b-Cyclodextrin	Uridine	D-Gluconic acid	D-Sorbitol	a-Hydroxybutyric acid	D-Serine	D,L-Octopamine	Gly-Glu	Caproic acid	Tween 80	2-Aminoethanol
	D-Galactose	a-Methyl-D-Galactoside	a-D-Lactose	Chondroitin Sulfate C	2`-Deoxyadenosine	D-Glucosaminic acid	Glycerol	a-Hydroxyglutaric acid-g-Lactone	D-Threonine	m-Hydroxyphenyl Acetic acid	Gly-Pro	d-Amino Valeric acid		3-Hydroxy-2-butanone
	D-Mannose	a-Methyl-D-Glucoside	D-Cellobiose	D-Melezitose	Thymidine	D-Glucuronic acid	m-Inositol	a-Ketobutyric acid	Glycine	Phenylethylamine	Gelatin	Sebacic acid		D-Galactonic acid-g-Lactone
	D-Ribose	a-Methyl-D-Mannoside	D-Melibiose	D-Raffinose		D-Saccharic acid	Adonitol	a-Ketoglutaric acid	Hydroxy-L-Proline	p-Hydroxyphenyl Acetic acid		Sorbic acid		Dihydroxyacetone
	D-Xylose	b-Methyl-D-Galactoside	Gentiobiose	g-Cyclodextrin		D-Tartaric acid	D-Lactitol	a-Keto-Valeric acid	L-Alanine	Tyramine				DL-a-Glycerol Phosphate
	Glucuronamide	b-Methyl-D-Glucoside	Lactulose	Glycogen		L-Tartaric acid	Dulcitol	b-Hydroxybutyric acid	L-Arginine	Amygdalin				L-Alaninamide
	L-Arabinose	b-Methyl-D-Xyloside	Maltose	Inulin		m-Tartaric acid	i-Erythritol	Bromosuccinic acid	L-Asparagine	Arbutin				Methylpyruvate
	L-Lyxose	D-Fructose-6-Phosphate	Melibionic acid	Laminarin		Mucic acid	L-Arabitol	Citraconic acid	L-Aspartic acid	Salicin				Putrescine
	b-D-Allose	D-Glucose-1-Phosphate	Palatinose	Maltotriose		Quinic acid	Maltitol	Citramalic acid	L-Glutamic acid					2,3-Butanediol
	D-Arabinose	D-Glucose-6-Phosphate	Turanose	Mannan		b-Methyl-D-Glucuronic acid	N-Acetyl-D-Glucosaminitol	Citric acid	L-Glutamine					Acetamide
	D-Fucose			Pectin		N-Acetyl-Neuraminic acid	Xylitol	D,L-Carnitine	L-Histidine					D-Lactic acid Methyl Ester
	D-Psicose			Stachyose				DL-Malic acid	L-Homoserine					D-Ribono-1,4-Lactone
	D-Tagatose							D-Malic acid	L-Isoleucine					L-Galactonic acid-g-Lactone
	L-Fucose							Formic acid	L-Leucine					sec-Butylamine
	L-Glucose							Fumaric acid	L-Lysine					Sedoheptulosan
	L-Rhamnose							g-Amino-N-Butyric acid	L-Ornithine
	L-Sorbose							Glycolic acid	L-Phenylalanine
	N-Acetyl-D-Galactosamine							Glyoxylic acid	L-Proline
	N-Acetyl-D-Mannosamine							Itaconic acid	L-Serine
								L-Lactic acid	L-Threonine
								L-Malic acid	L-Valine
								L-Pyroglutamic acid	N-Acetyl-L-Glutamic acid
								Malonic acid	L-Methionine
								Mono-Methylsuccinate
								Propionic acid
								Pyruvic acid
								Succinamic acid
								Succinic acid
								Tricarballylic acid
								g-Hydroxybutyric acid
								Oxalic acid
								Oxalomalic acid

## Sheet: KEGG Map Summary
	KEGG	total unique reactions	reactions in rhizosphere isolates	reactions in endosphere isolates
	Fatty acid biosynthesis	7	0	35
	1- and 2-Methylnaphthalene degradation	4	0	7
	Glycerolipid metabolism	2	0	6
	Purine metabolism	2	0	8
	Alkaloid biosynthesis I	1	0	1
	Indole and ipecac alkaloid biosynthesis	1	0	1
	Carbon fixation in photosynthetic organisms	1	0	2
	Naphthalene and anthracene degradation	1	0	2
	Terpenoid biosynthesis	1	0	2
	Phenylalanine metabolism	5	1	23
	Pyrimidine metabolism	3	1	21
	Lysine biosynthesis	4	1	10
	Arginine and proline metabolism	2	2	18
	Nicotinate and nicotinamide metabolism	1	1	7
	Urea cycle and metabolism of amino groups	4	4	25
	Ascorbate and aldarate metabolism	3	6	37
	Biotin metabolism	2	4	24
	Phenylalanine, tyrosine and tryptophan biosynthesis	1	2	11
	Folate biosynthesis	6	11	55
	Glycolysis / Gluconeogenesis	3	8	40
	Streptomycin biosynthesis	1	3	15
	Tyrosine metabolism	10	4	18
	Citrate cycle (TCA cycle)	1	2	9
	Glycine, serine and threonine metabolism	4	5	22
	Lysine degradation	4	6	26
	beta-Alanine metabolism	1	3	13
	Porphyrin and chlorophyll metabolism	2	5	21
	Pentose and glucuronate interconversions	5	6	25
	Nitrogen metabolism	6	16	64
	Thiamine metabolism	2	7	28
	gamma-Hexachlorocyclohexane degradation	1	2	8
	Starch and sucrose metabolism	4	12	47
	Butanoate metabolism	6	9	35
	Propanoate metabolism	4	8	31
	D-Glutamine and D-glutamate metabolism	2	6	23
	Pentose phosphate pathway	7	17	64
	Pyruvate metabolism	7	12	45
	Fluorene degradation	2	4	15
	Benzoate degradation via hydroxylation	2	8	28
	Methane metabolism	1	2	7
	Sulfur metabolism	1	4	14
	Carbazole degradation	1	4	14
	Histidine metabolism	1	4	14
	Benzoate degradation via CoA ligation	5	19	66
	Aminosugars metabolism	7	18	62
	Fructose and mannose metabolism	4	9	31
	Selenoamino acid metabolism	1	4	13
	Methionine metabolism	10	21	68
	Ubiquinone biosynthesis	2	4	12
	Glutathione metabolism	1	4	11
	Styrene degradation	5	13	32
	Inositol metabolism	3	9	21
	Inositol phosphate metabolism	2	6	14
	Pantothenate and CoA biosynthesis	1	3	7
	Glyoxylate and dicarboxylate metabolism	4	10	23
	Tryptophan metabolism	4	11	17
	not identified	103	167	739

## Sheet: nonCoreRxns
	reaction	KEGG Map	KBase Reaction ID	GM74	GM49	GM48	GM25	GM16	GM67	GM80	GM79	GM78	GM60	GM55	GM50	GM33	GM30	GM24	GM21	GM18	GM102	GM41	rhizosphere count	endosphere count	transporter?
	Naphthyl-2-methyl-succinic acid[c0] + Succinyl-CoA[c0] <=> Succinate[c0] + Naphthyl-2-methyl-succinyl-CoA[c0]	1- and 2-Methylnaphthalene degradation	rxn04713_c0	FALSE	FALSE	FALSE	FALSE	FALSE	FALSE	FALSE	FALSE	TRUE	FALSE	FALSE	FALSE	FALSE	FALSE	FALSE	FALSE	FALSE	FALSE	FALSE	0	1	0
	(2)H+[c0] + NADH[c0] + 4-Hydroxymethylsalicylate[c0] + O2[c0] => H2O[c0] + CO2[c0] + NAD[c0] + 4-Hydroxymethylcatechol[c0]	1- and 2-Methylnaphthalene degradation	rxn04745_c0	FALSE	FALSE	FALSE	FALSE	FALSE	FALSE	FALSE	FALSE	FALSE	FALSE	TRUE	FALSE	FALSE	FALSE	FALSE	FALSE	FALSE	FALSE	TRUE	0	2	0
	(2)H+[c0] + m-Cresotic acid[c0] + NADH[c0] + O2[c0] => H2O[c0] + CO2[c0] + NAD[c0] + 4-Methylcatechol[c0]	1- and 2-Methylnaphthalene degradation	rxn04748_c0	FALSE	FALSE	FALSE	FALSE	FALSE	FALSE	FALSE	FALSE	FALSE	FALSE	TRUE	FALSE	FALSE	FALSE	FALSE	FALSE	FALSE	FALSE	TRUE	0	2	0
	(2)H+[c0] + NADH[c0] + 3-Methylsalicylate[c0] + O2[c0] => 3-Methylcatechol[c0] + NAD[c0] + H2O[c0] + CO2[c0]	1- and 2-Methylnaphthalene degradation	rxn04724_c0	FALSE	FALSE	FALSE	FALSE	FALSE	FALSE	FALSE	FALSE	FALSE	FALSE	TRUE	FALSE	FALSE	FALSE	FALSE	FALSE	FALSE	FALSE	TRUE	0	2	0
	H+[c0] + L-Tyrosine[c0] => Tyramine[c0] + CO2[c0]	Alkaloid biosynthesis I	rxn00529_c0	FALSE	FALSE	FALSE	FALSE	FALSE	FALSE	TRUE	FALSE	FALSE	FALSE	FALSE	FALSE	FALSE	FALSE	FALSE	FALSE	FALSE	FALSE	FALSE	0	1	0
	H2O[c0] + Chitobiose[c0] => (2)N-Acetyl-D-glucosamine[c0]	Aminosugars metabolism	rxn00016_c0	FALSE	FALSE	FALSE	FALSE	FALSE	FALSE	FALSE	FALSE	FALSE	FALSE	FALSE	TRUE	FALSE	FALSE	FALSE	FALSE	FALSE	TRUE	FALSE	0	2	0
	H+[c0] + Phosphate[c0] + Neu5Ac[c0] <= H2O[c0] + N-Acetyl-D-mannosamine[c0] + Phosphoenolpyruvate[c0]	Aminosugars metabolism	rxn01316_c0	TRUE	FALSE	TRUE	TRUE	TRUE	TRUE	TRUE	TRUE	FALSE	TRUE	FALSE	TRUE	TRUE	TRUE	TRUE	TRUE	TRUE	TRUE	TRUE	3	13	0
	Neu5Ac[c0] + CTP[c0] => CMP-N-acetylneuraminate[c0] + PPi[c0]	Aminosugars metabolism	rxn00827_c0	TRUE	FALSE	TRUE	TRUE	TRUE	TRUE	TRUE	TRUE	FALSE	TRUE	FALSE	TRUE	TRUE	TRUE	TRUE	TRUE	TRUE	TRUE	TRUE	3	13	0
	H2O[c0] + D-Glucosamine phosphate[c0] => NH3[c0] + D-fructose-6-phosphate[c0]	Aminosugars metabolism	rxn00552_c0	FALSE	TRUE	TRUE	TRUE	TRUE	TRUE	TRUE	FALSE	FALSE	FALSE	TRUE	TRUE	TRUE	TRUE	TRUE	FALSE	TRUE	TRUE	TRUE	3	11	0
	H2O[c0] + N-Acetyl-D-glucosamine 6-phosphate[c0] <=> Acetate[c0] + D-Glucosamine phosphate[c0]	Aminosugars metabolism	rxn01484_c0	FALSE	TRUE	TRUE	TRUE	TRUE	TRUE	TRUE	FALSE	FALSE	FALSE	TRUE	TRUE	TRUE	TRUE	TRUE	FALSE	TRUE	TRUE	TRUE	3	11	0
	H2O[c0] + UDP-N-acetylglucosamine[c0] => UDP[c0] + N-Acetyl-D-mannosamine[c0]	Aminosugars metabolism	rxn00292_c0	FALSE	TRUE	TRUE	TRUE	FALSE	TRUE	FALSE	FALSE	FALSE	TRUE	TRUE	FALSE	FALSE	TRUE	FALSE	TRUE	FALSE	FALSE	TRUE	3	6	0
	UDP-N-acetylglucosamine[c0] <=> UDP-N-acetyl-D-mannosamine[c0]	Aminosugars metabolism	rxn00297_c0	FALSE	TRUE	TRUE	TRUE	FALSE	TRUE	FALSE	FALSE	FALSE	TRUE	TRUE	FALSE	FALSE	TRUE	FALSE	TRUE	FALSE	FALSE	TRUE	3	6	0
	D-Proline[c0] + O2[c0] => 1-Pyrroline-2-carboxylate[c0] + H2O2[c0]	Arginine and proline metabolism	rxn02071_c0	FALSE	TRUE	FALSE	FALSE	FALSE	TRUE	FALSE	TRUE	TRUE	FALSE	TRUE	TRUE	FALSE	FALSE	FALSE	TRUE	TRUE	TRUE	TRUE	1	9	0
	cis-4-Hydroxy-D-proline[c0] + O2[c0] => 1-Pyrroline-4-hydroxy-2-carboxylate[c0] + H2O2[c0]	Arginine and proline metabolism	rxn02946_c0	FALSE	TRUE	FALSE	FALSE	FALSE	TRUE	FALSE	TRUE	TRUE	FALSE	TRUE	TRUE	FALSE	FALSE	FALSE	TRUE	TRUE	TRUE	TRUE	1	9	0
	L-Arabinose[c0] + NAD[c0] <=> H+[c0] + NADH[c0] + L-Arabinono-1,4-lactone[c0]	Ascorbate and aldarate metabolism	rxn01289_c0	FALSE	FALSE	FALSE	FALSE	TRUE	TRUE	TRUE	FALSE	FALSE	TRUE	FALSE	FALSE	FALSE	TRUE	TRUE	TRUE	FALSE	FALSE	FALSE	0	7	0
	H2O[c0] + L-Arabinono-1,4-lactone[c0] => L-Arabinonate[c0] + H+[c0]	Ascorbate and aldarate metabolism	rxn01830_c0	TRUE	FALSE	TRUE	TRUE	TRUE	TRUE	TRUE	TRUE	TRUE	TRUE	TRUE	TRUE	TRUE	TRUE	TRUE	TRUE	TRUE	TRUE	TRUE	3	15	0
	L-Arabinonate[c0] => H2O[c0] + 2-Dehydro-3-deoxy-L-pentonate[c0]	Ascorbate and aldarate metabolism	rxn01828_c0	TRUE	FALSE	TRUE	TRUE	TRUE	TRUE	TRUE	TRUE	TRUE	TRUE	TRUE	TRUE	TRUE	TRUE	TRUE	TRUE	TRUE	TRUE	TRUE	3	15	0
	(S)-3-Hydroxybutyryl-CoA[c0] + NADP[c0] <=> H+[c0] + Acetoacetyl-CoA[c0] + NADPH[c0]	Benzoate degradation via CoA ligation	rxn01452_c0	TRUE	TRUE	TRUE	FALSE	TRUE	TRUE	FALSE	TRUE	TRUE	TRUE	TRUE	TRUE	TRUE	FALSE	TRUE	TRUE	TRUE	TRUE	TRUE	3	13	0
	NAD[c0] + cis-1,2-dihydroxybenzoate[c0] => Catechol[c0] + CO2[c0] + NADH[c0]	Benzoate degradation via CoA ligation	rxn00584_c0	TRUE	TRUE	TRUE	TRUE	TRUE	TRUE	TRUE	TRUE	TRUE	TRUE	TRUE	TRUE	TRUE	FALSE	TRUE	TRUE	TRUE	TRUE	TRUE	4	14	0
	H+[c0] + Benzoate[c0] + O2[c0] + NADPH[c0] => NADP[c0] + cis-1,2-dihydroxybenzoate[c0]	Benzoate degradation via CoA ligation	rxn03898_c0	TRUE	TRUE	TRUE	TRUE	TRUE	TRUE	TRUE	TRUE	TRUE	TRUE	TRUE	TRUE	TRUE	FALSE	TRUE	TRUE	TRUE	TRUE	TRUE	4	14	0
	H+[c0] + NADH[c0] + Benzoate[c0] + O2[c0] => NAD[c0] + cis-1,2-dihydroxybenzoate[c0]	Benzoate degradation via CoA ligation	rxn03897_c0	TRUE	TRUE	TRUE	TRUE	TRUE	TRUE	TRUE	TRUE	TRUE	TRUE	TRUE	TRUE	TRUE	FALSE	TRUE	TRUE	TRUE	TRUE	TRUE	4	14	0
	H2O[c0] + Benzamide[c0] => NH3[c0] + Benzoate[c0]	Benzoate degradation via CoA ligation	rxn03869_c0	TRUE	TRUE	TRUE	TRUE	TRUE	TRUE	TRUE	FALSE	TRUE	TRUE	TRUE	FALSE	TRUE	TRUE	TRUE	FALSE	TRUE	FALSE	TRUE	4	11	0
	Muconolactone[c0] <=> 3-oxoadipate-enol-lactone[c0]	Benzoate degradation via hydroxylation	rxn02971_c0	TRUE	TRUE	TRUE	TRUE	TRUE	TRUE	TRUE	TRUE	TRUE	TRUE	TRUE	TRUE	TRUE	FALSE	TRUE	TRUE	TRUE	TRUE	TRUE	4	14	0
	Muconolactone[c0] <=> H+[c0] + cis,cis-Muconate[c0]	Benzoate degradation via hydroxylation	rxn02782_c0	TRUE	TRUE	TRUE	TRUE	TRUE	TRUE	TRUE	TRUE	TRUE	TRUE	TRUE	TRUE	TRUE	FALSE	TRUE	TRUE	TRUE	TRUE	TRUE	4	14	0
	H+[c0] + L-Aspartate[c0] => beta-Alanine[c0] + CO2[c0]	beta-Alanine metabolism	rxn00346_c0	TRUE	TRUE	TRUE	FALSE	TRUE	TRUE	FALSE	TRUE	FALSE	TRUE	TRUE	TRUE	TRUE	TRUE	TRUE	TRUE	TRUE	TRUE	TRUE	3	13	0
	H+[c0] + Pimeloyl-CoA[c0] + L-Alanine[c0] => CO2[c0] + 8-Amino-7-oxononanoate[c0] + CoA[c0]	Biotin metabolism	rxn02297_c0	FALSE	FALSE	FALSE	TRUE	TRUE	TRUE	TRUE	TRUE	TRUE	TRUE	TRUE	TRUE	TRUE	TRUE	TRUE	TRUE	TRUE	TRUE	TRUE	1	15	0
	H+[c0] + ATP[c0] + BIOT[c0] <= PPi[c0] + Biotinyl-5-AMP[c0]	Biotin metabolism	rxn00792_c0	TRUE	TRUE	TRUE	FALSE	FALSE	FALSE	TRUE	TRUE	TRUE	FALSE	FALSE	TRUE	TRUE	FALSE	FALSE	TRUE	TRUE	TRUE	TRUE	3	9	0
	Butyryl-CoA[c0] + Acetate[c0] <=> Butyrate[c0] + Acetyl-CoA[c0]	Butanoate metabolism	rxn00875_c0	FALSE	FALSE	FALSE	FALSE	FALSE	FALSE	FALSE	FALSE	TRUE	FALSE	FALSE	FALSE	FALSE	FALSE	FALSE	FALSE	FALSE	FALSE	FALSE	0	1	0
	NAD[c0] + ACTN[c0] <=> H+[c0] + NADH[c0] + DTYL[c0]	Butanoate metabolism	rxn01685_c0	FALSE	FALSE	FALSE	FALSE	TRUE	FALSE	FALSE	FALSE	FALSE	FALSE	FALSE	FALSE	TRUE	FALSE	TRUE	FALSE	FALSE	FALSE	FALSE	0	3	0
	NAD[c0] + BDOH[c0] <=> H+[c0] + NADH[c0] + ACTN[c0]	Butanoate metabolism	rxn02112_c0	FALSE	FALSE	FALSE	FALSE	TRUE	FALSE	FALSE	FALSE	FALSE	FALSE	FALSE	FALSE	TRUE	FALSE	TRUE	FALSE	FALSE	FALSE	FALSE	0	3	0
	D-Malate[c0] + NAD[c0] => Pyruvate[c0] + CO2[c0] + NADH[c0]	Butanoate metabolism	rxn00160_c0	TRUE	TRUE	TRUE	FALSE	TRUE	FALSE	FALSE	TRUE	TRUE	FALSE	TRUE	TRUE	TRUE	FALSE	TRUE	FALSE	TRUE	TRUE	TRUE	3	10	0
	H2O[c0] + 4-Oxobutanoate[c0] + NAD[c0] => (2)H+[c0] + Succinate[c0] + NADH[c0]	Butanoate metabolism	rxn00508_c0	TRUE	TRUE	TRUE	TRUE	TRUE	TRUE	TRUE	TRUE	TRUE	TRUE	TRUE	FALSE	TRUE	TRUE	TRUE	TRUE	FALSE	TRUE	TRUE	4	13	0
	NADP[c0] + (R)-3-Hydroxybutanoyl-CoA[c0] <=> H+[c0] + Acetoacetyl-CoA[c0] + NADPH[c0]	Butanoate metabolism	rxn01453_c0	FALSE	TRUE	TRUE	FALSE	FALSE	FALSE	FALSE	FALSE	TRUE	FALSE	TRUE	FALSE	TRUE	FALSE	FALSE	TRUE	FALSE	FALSE	TRUE	2	5	0
	Catechol[c0] + O2[c0] => (2)H+[c0] + cis,cis-Muconate[c0]	Carbazole degradation	rxn00588_c0	TRUE	TRUE	TRUE	TRUE	TRUE	TRUE	TRUE	TRUE	TRUE	TRUE	TRUE	TRUE	TRUE	FALSE	TRUE	TRUE	TRUE	TRUE	TRUE	4	14	0
	L-Malate[c0] + NAD[c0] <=> H+[c0] + Oxaloacetate[c0] + NADH[c0]	Carbon fixation in photosynthetic organisms	rxn00248_c0	FALSE	FALSE	FALSE	FALSE	FALSE	FALSE	FALSE	FALSE	TRUE	FALSE	FALSE	FALSE	FALSE	FALSE	FALSE	FALSE	TRUE	FALSE	FALSE	0	2	0
	Citrate[c0] <=> Oxaloacetate[c0] + Acetate[c0]	Citrate cycle (TCA cycle)	rxn00265_c0	TRUE	TRUE	FALSE	FALSE	FALSE	FALSE	TRUE	TRUE	TRUE	FALSE	TRUE	FALSE	TRUE	TRUE	FALSE	TRUE	FALSE	TRUE	TRUE	2	9	0
	H2O[c0] + L-Glutamine[c0] => NH3[c0] + L-Glutamate[c0]	D-Glutamine and D-glutamate metabolism	rxn00189_c0	FALSE	TRUE	FALSE	TRUE	TRUE	TRUE	TRUE	TRUE	FALSE	TRUE	FALSE	TRUE	TRUE	TRUE	TRUE	FALSE	TRUE	TRUE	TRUE	2	12	0
	NADP[c0] + H2O[c0] + L-Glutamate[c0] <=> H+[c0] + NH3[c0] + 2-Oxoglutarate[c0] + NADPH[c0]	D-Glutamine and D-glutamate metabolism	rxn00184_c0	TRUE	TRUE	TRUE	TRUE	TRUE	TRUE	TRUE	FALSE	TRUE	TRUE	TRUE	FALSE	TRUE	TRUE	TRUE	TRUE	FALSE	FALSE	TRUE	4	11	0
	NADP[c0] + hexadecanoyl-acp[c0] <= H+[c0] + (2E)-Hexadecenoyl-[acp][c0] + NADPH[c0]	Fatty acid biosynthesis	rxn05354_c0	FALSE	FALSE	FALSE	FALSE	FALSE	FALSE	FALSE	TRUE	TRUE	FALSE	FALSE	TRUE	FALSE	FALSE	FALSE	FALSE	FALSE	TRUE	TRUE	0	5	0
	Decanoyl-ACP[c0] + NADP[c0] <= (2E)-Decenoyl-[acp][c0] + H+[c0] + NADPH[c0]	Fatty acid biosynthesis	rxn05356_c0	FALSE	FALSE	FALSE	FALSE	FALSE	FALSE	FALSE	TRUE	TRUE	FALSE	FALSE	TRUE	FALSE	FALSE	FALSE	FALSE	FALSE	TRUE	TRUE	0	5	0
	NADP[c0] + Myristoyl-ACP[c0] <= H+[c0] + (2E)-Tetradecenoyl-[acp][c0] + NADPH[c0]	Fatty acid biosynthesis	rxn05351_c0	FALSE	FALSE	FALSE	FALSE	FALSE	FALSE	FALSE	TRUE	TRUE	FALSE	FALSE	TRUE	FALSE	FALSE	FALSE	FALSE	FALSE	TRUE	TRUE	0	5	0
	NADP[c0] + Dodecanoyl-ACP[c0] <= H+[c0] + (2E)-Dodecenoyl-[acp][c0] + NADPH[c0]	Fatty acid biosynthesis	rxn05355_c0	FALSE	FALSE	FALSE	FALSE	FALSE	FALSE	FALSE	TRUE	TRUE	FALSE	FALSE	TRUE	FALSE	FALSE	FALSE	FALSE	FALSE	TRUE	TRUE	0	5	0
	NADP[c0] + Hexanoyl-ACP[c0] <= H+[c0] + (2E)-Hexenoyl-[acp][c0] + NADPH[c0]	Fatty acid biosynthesis	rxn05357_c0	FALSE	FALSE	FALSE	FALSE	FALSE	FALSE	FALSE	TRUE	TRUE	FALSE	FALSE	TRUE	FALSE	FALSE	FALSE	FALSE	FALSE	TRUE	TRUE	0	5	0
	NADP[c0] + Octanoyl-ACP[c0] <= (2E)-Octenoyl-[acp][c0] + H+[c0] + NADPH[c0]	Fatty acid biosynthesis	rxn05352_c0	FALSE	FALSE	FALSE	FALSE	FALSE	FALSE	FALSE	TRUE	TRUE	FALSE	FALSE	TRUE	FALSE	FALSE	FALSE	FALSE	FALSE	TRUE	TRUE	0	5	0
	Butyryl-ACP[c0] + NADP[c0] <= H+[c0] + But-2-enoyl-[acyl-carrier protein][c0] + NADPH[c0]	Fatty acid biosynthesis	rxn05353_c0	FALSE	FALSE	FALSE	FALSE	FALSE	FALSE	FALSE	TRUE	TRUE	FALSE	FALSE	TRUE	FALSE	FALSE	FALSE	FALSE	FALSE	TRUE	TRUE	0	5	0
	SALC[c0] + (2)H+[c0] + NADH[c0] + O2[c0] => NAD[c0] + Catechol[c0] + H2O[c0] + CO2[c0]	Fluorene degradation	rxn00589_c0	FALSE	FALSE	FALSE	FALSE	FALSE	FALSE	FALSE	FALSE	FALSE	FALSE	TRUE	FALSE	FALSE	FALSE	FALSE	FALSE	FALSE	FALSE	TRUE	0	2	0
	2-Hydroxymuconate[c0] => 4-Oxalocrotonate[c0]	Fluorene degradation	rxn02788_c0	TRUE	TRUE	TRUE	TRUE	TRUE	TRUE	FALSE	TRUE	TRUE	TRUE	TRUE	TRUE	TRUE	FALSE	TRUE	TRUE	TRUE	TRUE	TRUE	4	13	0
	H+[c0] + Dihydrobiopterin[c0] + NADH[c0] <=> Tetrahydrobiopterin[c0] + NAD[c0]	Folate biosynthesis	rxn01313_c0	FALSE	FALSE	FALSE	FALSE	FALSE	FALSE	TRUE	FALSE	FALSE	FALSE	TRUE	FALSE	FALSE	FALSE	FALSE	FALSE	FALSE	FALSE	FALSE	0	2	0
	H+[c0] + Dihydrobiopterin[c0] + NADPH[c0] <=> NADP[c0] + Tetrahydrobiopterin[c0]	Folate biosynthesis	rxn01314_c0	FALSE	FALSE	FALSE	FALSE	FALSE	FALSE	TRUE	FALSE	FALSE	FALSE	TRUE	FALSE	FALSE	FALSE	FALSE	FALSE	FALSE	FALSE	FALSE	0	2	0
	ATP[c0] + Tetrahydrofolate[c0] + L-Glutamate[c0] => H+[c0] + Phosphate[c0] + THF-L-glutamate[c0] + ADP[c0]	Folate biosynthesis	rxn00689_c0	TRUE	FALSE	TRUE	TRUE	TRUE	TRUE	TRUE	TRUE	TRUE	TRUE	TRUE	TRUE	TRUE	TRUE	TRUE	TRUE	TRUE	TRUE	TRUE	3	15	0
	Dihydropteroate[c0] + ATP[c0] + L-Glutamate[c0] => H+[c0] + Dihydrofolate[c0] + Phosphate[c0] + ADP[c0]	Folate biosynthesis	rxn01603_c0	TRUE	FALSE	TRUE	TRUE	TRUE	TRUE	TRUE	TRUE	TRUE	TRUE	TRUE	TRUE	TRUE	TRUE	TRUE	TRUE	TRUE	TRUE	TRUE	3	15	0
	L-Glutamine[c0] + Chorismate[c0] <=> ADC[c0] + L-Glutamate[c0]	Folate biosynthesis	rxn01257_c0	TRUE	TRUE	TRUE	FALSE	TRUE	TRUE	TRUE	TRUE	TRUE	TRUE	TRUE	TRUE	FALSE	FALSE	TRUE	TRUE	TRUE	TRUE	TRUE	3	13	0
	(3)H2O[c0] + 7,8-Dihydroneopterin 3'-triphosphate[c0] => (3)H+[c0] + (3)Phosphate[c0] + Dihydroneopterin[c0]	Folate biosynthesis	rxn03167_c0	TRUE	FALSE	FALSE	TRUE	TRUE	FALSE	TRUE	FALSE	FALSE	TRUE	FALSE	TRUE	TRUE	TRUE	TRUE	FALSE	FALSE	FALSE	TRUE	2	8	0
	NAD[c0] + Sorbitol 6-phosphate[c0] <=> H+[c0] + D-fructose-6-phosphate[c0] + NADH[c0]	Fructose and mannose metabolism	rxn03886_c0	FALSE	FALSE	FALSE	FALSE	FALSE	FALSE	FALSE	FALSE	FALSE	TRUE	FALSE	FALSE	FALSE	FALSE	FALSE	FALSE	FALSE	FALSE	FALSE	0	1	0
	D-Mannitol[c0] + NAD[c0] <=> H+[c0] + NADH[c0] + D-Fructose[c0]	Fructose and mannose metabolism	rxn00629_c0	TRUE	TRUE	TRUE	TRUE	TRUE	TRUE	TRUE	TRUE	TRUE	TRUE	TRUE	TRUE	TRUE	TRUE	TRUE	FALSE	TRUE	TRUE	TRUE	4	14	0
	D-Mannose1-phosphate[c0] + GDP[c0] <=> H+[c0] + Phosphate[c0] + GDP-mannose[c0]	Fructose and mannose metabolism	rxn00640_c0	TRUE	TRUE	TRUE	TRUE	TRUE	TRUE	TRUE	TRUE	TRUE	TRUE	TRUE	FALSE	TRUE	TRUE	TRUE	TRUE	TRUE	TRUE	FALSE	4	13	0
	D-Glucose[c0] <=> D-Fructose[c0]	Fructose and mannose metabolism	rxn00223_c0	FALSE	FALSE	FALSE	TRUE	TRUE	FALSE	FALSE	FALSE	FALSE	FALSE	FALSE	FALSE	FALSE	FALSE	TRUE	FALSE	TRUE	FALSE	FALSE	1	3	0
	4-Nitrophenyl phosphate[c0] + H2O[c0] => PNP[c0] + H+[c0] + Phosphate[c0]	gamma-Hexachlorocyclohexane degradation	rxn02166_c0	TRUE	FALSE	FALSE	TRUE	TRUE	FALSE	TRUE	FALSE	FALSE	TRUE	FALSE	TRUE	TRUE	TRUE	TRUE	FALSE	FALSE	FALSE	TRUE	2	8	0
	Putrescine[c0] + S-Adenosylmethioninamine[c0] => H+[c0] + 5-Methylthioadenosine[c0] + Spermidine[c0]	Glutathione metabolism	rxn01406_c0	TRUE	TRUE	TRUE	TRUE	TRUE	TRUE	TRUE	FALSE	TRUE	TRUE	TRUE	FALSE	TRUE	TRUE	TRUE	FALSE	TRUE	FALSE	TRUE	4	11	0
	ATP[c0] + Glycerone[c0] <=> ADP[c0] + Glycerone-phosphate[c0]	Glycerolipid metabolism	rxn00744_c0	FALSE	FALSE	FALSE	FALSE	FALSE	FALSE	FALSE	FALSE	FALSE	TRUE	FALSE	FALSE	FALSE	FALSE	FALSE	FALSE	FALSE	FALSE	FALSE	0	1	0
	NAD[c0] + Glycerol[c0] <=> H+[c0] + NADH[c0] + Glycerone[c0]	Glycerolipid metabolism	rxn00762_c0	FALSE	FALSE	FALSE	FALSE	TRUE	FALSE	FALSE	FALSE	TRUE	TRUE	FALSE	FALSE	TRUE	FALSE	TRUE	FALSE	FALSE	FALSE	FALSE	0	5	0
	Glycine[c0] + Acetyl-CoA[c0] <=> L-2-Amino-acetoacetate[c0] + CoA[c0]	Glycine, serine and threonine metabolism	rxn00274_c0	FALSE	FALSE	FALSE	FALSE	FALSE	FALSE	TRUE	FALSE	FALSE	FALSE	FALSE	FALSE	FALSE	FALSE	FALSE	FALSE	FALSE	FALSE	FALSE	0	1	0
	D-Serine[c0] => Pyruvate[c0] + NH3[c0]	Glycine, serine and threonine metabolism	rxn00166_c0	FALSE	FALSE	FALSE	FALSE	FALSE	FALSE	FALSE	FALSE	FALSE	FALSE	TRUE	FALSE	FALSE	FALSE	FALSE	FALSE	FALSE	FALSE	FALSE	0	1	0
	H2O[c0] + O2[c0] + Glycine[c0] => NH3[c0] + Glyoxalate[c0] + H2O2[c0]	Glycine, serine and threonine metabolism	rxn00269_c0	TRUE	TRUE	TRUE	FALSE	TRUE	TRUE	TRUE	TRUE	TRUE	TRUE	TRUE	TRUE	TRUE	FALSE	TRUE	TRUE	TRUE	TRUE	TRUE	3	14	0
	H2O[c0] + Aminoacetone[c0] + O2[c0] => NH3[c0] + 2-Oxopropanal[c0] + H2O2[c0]	Glycine, serine and threonine metabolism	rxn01833_c0	TRUE	TRUE	FALSE	FALSE	FALSE	TRUE	FALSE	FALSE	TRUE	TRUE	TRUE	FALSE	TRUE	FALSE	FALSE	TRUE	FALSE	FALSE	FALSE	2	6	0
	D-Glucose[c0] <=> beta-D-Glucose[c0]	Glycolysis / Gluconeogenesis	rxn01171_c0	FALSE	FALSE	FALSE	TRUE	TRUE	TRUE	TRUE	TRUE	FALSE	TRUE	FALSE	TRUE	FALSE	TRUE	TRUE	FALSE	TRUE	TRUE	TRUE	1	11	0
	ATP[c0] + beta-D-Glucose[c0] <=> beta-D-Glucose 6-phosphate[c0] + ADP[c0]	Glycolysis / Gluconeogenesis	rxn01169_c0	FALSE	TRUE	TRUE	TRUE	TRUE	TRUE	TRUE	TRUE	TRUE	TRUE	TRUE	TRUE	TRUE	TRUE	TRUE	TRUE	TRUE	TRUE	TRUE	3	15	0
	beta-D-Glucose 6-phosphate[c0] <=> D-fructose-6-phosphate[c0]	Glycolysis / Gluconeogenesis	rxn02380_c0	TRUE	TRUE	TRUE	TRUE	TRUE	TRUE	TRUE	TRUE	TRUE	TRUE	TRUE	TRUE	TRUE	TRUE	TRUE	FALSE	TRUE	TRUE	TRUE	4	14	0
	Tartrate[c0] + NAD[c0] <=> H+[c0] + Oxaloglycolate[c0] + NADH[c0]	Glyoxylate and dicarboxylate metabolism	rxn04143_c0	TRUE	TRUE	TRUE	FALSE	TRUE	FALSE	FALSE	TRUE	TRUE	FALSE	TRUE	TRUE	TRUE	FALSE	TRUE	FALSE	TRUE	TRUE	TRUE	3	10	0
	meso-Tartrate[c0] + NAD[c0] <=> H+[c0] + Oxaloglycolate[c0] + NADH[c0]	Glyoxylate and dicarboxylate metabolism	rxn01847_c0	TRUE	TRUE	TRUE	FALSE	TRUE	FALSE	FALSE	TRUE	TRUE	FALSE	TRUE	TRUE	TRUE	FALSE	TRUE	FALSE	TRUE	TRUE	TRUE	3	10	0
	Tartrate[c0] => Oxaloacetate[c0] + H2O[c0]	Glyoxylate and dicarboxylate metabolism	rxn00245_c0	FALSE	TRUE	FALSE	FALSE	FALSE	FALSE	FALSE	FALSE	FALSE	FALSE	FALSE	FALSE	TRUE	FALSE	FALSE	FALSE	FALSE	FALSE	FALSE	1	1	0
	H2O[c0] + N-Formylkynurenine[c0] <=> H+[c0] + L-Kynurenine[c0] + Formate[c0]	Glyoxylate and dicarboxylate metabolism	rxn01437_c0	TRUE	TRUE	TRUE	FALSE	FALSE	FALSE	FALSE	FALSE	FALSE	FALSE	FALSE	FALSE	TRUE	FALSE	FALSE	FALSE	TRUE	FALSE	FALSE	3	2	0
	4-Imidazolone-5-propanoate[c0] <=> H2O[c0] + Urocanate[c0]	Histidine metabolism	rxn02085_c0	TRUE	TRUE	TRUE	TRUE	TRUE	TRUE	TRUE	TRUE	TRUE	TRUE	TRUE	TRUE	TRUE	TRUE	TRUE	TRUE	FALSE	TRUE	TRUE	4	14	0
	L-Tryptophan[c0] + H+[c0] => Tryptamine[c0] + CO2[c0]	Indole and ipecac alkaloid biosynthesis	rxn00484_c0	FALSE	FALSE	FALSE	FALSE	FALSE	FALSE	TRUE	FALSE	FALSE	FALSE	FALSE	FALSE	FALSE	FALSE	FALSE	FALSE	FALSE	FALSE	FALSE	0	1	0
	H2O[c0] + DKDI[c0] => 5-Deoxy glucuronic acid[c0] + H+[c0]	Inositol metabolism	rxn12147_c0	FALSE	TRUE	TRUE	TRUE	FALSE	TRUE	FALSE	TRUE	TRUE	FALSE	FALSE	TRUE	FALSE	FALSE	FALSE	FALSE	TRUE	TRUE	TRUE	3	7	0
	ATP[c0] + DKH[c0] <=> DKHP[c0] + ADP[c0]	Inositol metabolism	rxn03932_c0	FALSE	TRUE	TRUE	TRUE	FALSE	TRUE	FALSE	TRUE	TRUE	FALSE	FALSE	TRUE	FALSE	FALSE	FALSE	FALSE	TRUE	TRUE	TRUE	3	7	0
	5-Deoxy glucuronic acid[c0] <=> DKH[c0]	Inositol metabolism	rxn12146_c0	FALSE	TRUE	TRUE	TRUE	FALSE	TRUE	FALSE	TRUE	TRUE	FALSE	FALSE	TRUE	FALSE	FALSE	FALSE	FALSE	TRUE	TRUE	TRUE	3	7	0
	L-Inositol[c0] + NAD[c0] <=> H+[c0] + 2-Inosose[c0] + NADH[c0]	Inositol phosphate metabolism	rxn00879_c0	FALSE	TRUE	TRUE	TRUE	FALSE	TRUE	FALSE	TRUE	TRUE	FALSE	FALSE	TRUE	FALSE	FALSE	FALSE	FALSE	TRUE	TRUE	TRUE	3	7	0
	2-Inosose[c0] => H2O[c0] + DKDI[c0]	Inositol phosphate metabolism	rxn02007_c0	FALSE	TRUE	TRUE	TRUE	FALSE	TRUE	FALSE	TRUE	TRUE	FALSE	FALSE	TRUE	FALSE	FALSE	FALSE	FALSE	TRUE	TRUE	TRUE	3	7	0
	alpha-Aminoadipoyl-C6-AMP[c0] + Holo-Lys2[c0] => Aminoadip.-S[c0] + H+[c0] + AMP[c0]	Lysine biosynthesis	rxn06802_c0	FALSE	FALSE	FALSE	FALSE	FALSE	TRUE	FALSE	FALSE	TRUE	FALSE	FALSE	FALSE	FALSE	FALSE	FALSE	FALSE	FALSE	FALSE	FALSE	0	2	0
	Aminoadip.-S[c0] + (2)H+[c0] + NADPH[c0] <=> 2-Aminoadipate 6-semialdehyde[c0] + NADP[c0] + Holo-Lys2[c0]	Lysine biosynthesis	rxn06675_c0	FALSE	FALSE	FALSE	FALSE	FALSE	TRUE	FALSE	FALSE	TRUE	FALSE	FALSE	FALSE	FALSE	FALSE	FALSE	FALSE	FALSE	FALSE	FALSE	0	2	0
	H+[c0] + ATP[c0] + L-2-Aminoadipate[c0] <= alpha-Aminoadipoyl-C6-AMP[c0] + PPi[c0]	Lysine biosynthesis	rxn02224_c0	FALSE	FALSE	FALSE	FALSE	FALSE	TRUE	FALSE	FALSE	TRUE	FALSE	FALSE	FALSE	FALSE	FALSE	FALSE	FALSE	FALSE	FALSE	FALSE	0	2	0
	H2O[c0] + N-acetyl-LL-2,6-diaminopimelate[c0] <=> LL-2,6-Diaminopimelate[c0] + Acetate[c0]	Lysine biosynthesis	rxn01972_c0	FALSE	FALSE	FALSE	TRUE	TRUE	FALSE	FALSE	FALSE	TRUE	FALSE	FALSE	FALSE	TRUE	FALSE	TRUE	FALSE	FALSE	FALSE	FALSE	1	4	0
	2-Aminoadipate 6-semialdehyde[c0] + NADP[c0] + H2O[c0] => (2)H+[c0] + L-2-Aminoadipate[c0] + NADPH[c0]	Lysine degradation	rxn02227_c0	FALSE	FALSE	FALSE	FALSE	FALSE	TRUE	FALSE	FALSE	TRUE	FALSE	FALSE	FALSE	FALSE	FALSE	FALSE	FALSE	FALSE	FALSE	FALSE	0	2	0
	2-Aminoadipate 6-semialdehyde[c0] + H2O[c0] + NAD[c0] => (2)H+[c0] + L-2-Aminoadipate[c0] + NADH[c0]	Lysine degradation	rxn02226_c0	FALSE	FALSE	FALSE	FALSE	FALSE	TRUE	FALSE	FALSE	TRUE	FALSE	FALSE	FALSE	FALSE	FALSE	FALSE	FALSE	FALSE	FALSE	FALSE	0	2	0
	H2O[c0] + 5-Aminopentanamide[c0] => NH3[c0] + 5-Aminopentanoate[c0]	Lysine degradation	rxn01630_c0	TRUE	TRUE	TRUE	FALSE	TRUE	TRUE	TRUE	TRUE	TRUE	TRUE	TRUE	TRUE	TRUE	TRUE	TRUE	TRUE	TRUE	TRUE	TRUE	3	15	0
	L-Lysine[c0] <=> L-beta-Lysine[c0]	Lysine degradation	rxn00321_c0	TRUE	TRUE	TRUE	FALSE	FALSE	TRUE	FALSE	FALSE	TRUE	TRUE	TRUE	FALSE	TRUE	FALSE	FALSE	FALSE	FALSE	TRUE	TRUE	3	7	0
	H2O[c0] + Methanamine[c0] => (2)H+[c0] + NH3[c0] + Formaldehyde[c0]	Methane metabolism	rxn00431_c0	TRUE	TRUE	FALSE	FALSE	FALSE	TRUE	TRUE	FALSE	TRUE	TRUE	TRUE	FALSE	TRUE	FALSE	FALSE	TRUE	FALSE	FALSE	FALSE	2	7	0
	5-Methylthio-D-ribose[c0] + ATP[c0] <=> methylthioribose-1-phosphate[c0] + ADP[c0]	Methionine metabolism	rxn02894_c0	FALSE	FALSE	FALSE	FALSE	FALSE	FALSE	FALSE	FALSE	FALSE	FALSE	FALSE	FALSE	FALSE	FALSE	FALSE	TRUE	FALSE	FALSE	FALSE	0	1	0
	Homocysteine[c0] + S-Adenosyl-L-methionine[c0] => H+[c0] + L-Methionine[c0] + S-Adenosyl-homocysteine[c0]	Methionine metabolism	rxn00452_c0	FALSE	FALSE	FALSE	FALSE	TRUE	TRUE	TRUE	TRUE	FALSE	TRUE	FALSE	TRUE	FALSE	FALSE	TRUE	FALSE	TRUE	TRUE	TRUE	0	10	0
	H2O[c0] + Cystathionine[c0] => Pyruvate[c0] + NH3[c0] + Homocysteine[c0]	Methionine metabolism	rxn00950_c0	FALSE	TRUE	TRUE	FALSE	FALSE	TRUE	FALSE	TRUE	TRUE	TRUE	TRUE	TRUE	FALSE	FALSE	FALSE	TRUE	TRUE	TRUE	TRUE	2	10	0
	methylthioribulose-1-phosphate[c0] => H2O[c0] + 2,3-diketo5-methylthio-1-phosphopentane[c0]	Methionine metabolism	rxn05104_c0	TRUE	TRUE	TRUE	TRUE	TRUE	TRUE	TRUE	TRUE	FALSE	TRUE	TRUE	FALSE	TRUE	TRUE	TRUE	FALSE	TRUE	FALSE	TRUE	4	11	0
	2,3-diketo5-methylthio-1-phosphopentane[c0] <=> H+[c0] + 2-Hydroxy-3-keto-5-methylthiopentenyl-1-phosphate[c0]	Methionine metabolism	rxn05105_c0	TRUE	TRUE	TRUE	TRUE	TRUE	TRUE	TRUE	FALSE	FALSE	TRUE	TRUE	FALSE	TRUE	TRUE	TRUE	FALSE	TRUE	FALSE	TRUE	4	10	0
	H2O[c0] + 2-Hydroxy-3-keto-5-methylthiopentenyl-1-phosphate[c0] => H+[c0] + Phosphate[c0] + 1,2-dihydroxy-3-keto-5-methylthiopentene[c0]	Methionine metabolism	rxn05106_c0	TRUE	TRUE	TRUE	TRUE	TRUE	TRUE	TRUE	FALSE	FALSE	TRUE	TRUE	FALSE	TRUE	TRUE	TRUE	FALSE	TRUE	FALSE	TRUE	4	10	0
	H+[c0] + S-Adenosyl-L-methionine[c0] => CO2[c0] + S-Adenosylmethioninamine[c0]	Methionine metabolism	rxn00127_c0	TRUE	TRUE	TRUE	TRUE	TRUE	TRUE	TRUE	FALSE	FALSE	TRUE	TRUE	FALSE	TRUE	TRUE	TRUE	FALSE	TRUE	FALSE	TRUE	4	10	0
	O-Acetyl-L-homoserine[c0] + L-Cysteine[c0] <=> Cystathionine[c0] + Acetate[c0]	Methionine metabolism	rxn02302_c0	FALSE	TRUE	FALSE	FALSE	FALSE	FALSE	FALSE	TRUE	FALSE	FALSE	FALSE	FALSE	FALSE	FALSE	FALSE	FALSE	FALSE	FALSE	TRUE	1	2	0
	H2O[c0] + O-Succinyl-L-homoserine[c0] => H+[c0] + Succinate[c0] + NH3[c0] + 2-Oxobutyrate[c0]	Methionine metabolism	rxn00740_c0	FALSE	TRUE	FALSE	FALSE	FALSE	FALSE	FALSE	TRUE	FALSE	FALSE	FALSE	FALSE	FALSE	FALSE	FALSE	FALSE	FALSE	FALSE	TRUE	1	2	0
	Succinate[c0] + Cystathionine[c0] <=> L-Cysteine[c0] + O-Succinyl-L-homoserine[c0]	Methionine metabolism	rxn01816_c0	FALSE	TRUE	FALSE	FALSE	FALSE	FALSE	FALSE	TRUE	FALSE	FALSE	FALSE	FALSE	FALSE	FALSE	FALSE	FALSE	FALSE	FALSE	TRUE	1	2	0
	(2)H+[c0] + NADH[c0] + 1-Hydroxy-2-naphthoate[c0] + O2[c0] => H2O[c0] + CO2[c0] + NAD[c0] + 1,2-Naphthalenediol[c0]	Naphthalene and anthracene degradation	rxn03906_c0	FALSE	FALSE	FALSE	FALSE	FALSE	FALSE	FALSE	FALSE	FALSE	FALSE	TRUE	FALSE	FALSE	FALSE	FALSE	FALSE	FALSE	FALSE	TRUE	0	2	0
	Nicotinamide[c0] + H2O[c0] => NH3[c0] + Niacin[c0]	Nicotinate and nicotinamide metabolism	rxn00938_c0	FALSE	FALSE	FALSE	TRUE	TRUE	FALSE	FALSE	TRUE	FALSE	FALSE	FALSE	TRUE	FALSE	TRUE	TRUE	FALSE	TRUE	TRUE	FALSE	1	7	0
	NO[c0] + H2O[c0] + Cytochrome c3+[c0] <=> Nitrite[c0] + (2)H+[c0] + Cytochrome c2+[c0]	Nitrogen metabolism	rxn00567_c0	FALSE	FALSE	FALSE	FALSE	FALSE	TRUE	FALSE	TRUE	FALSE	TRUE	FALSE	FALSE	FALSE	FALSE	FALSE	FALSE	FALSE	FALSE	TRUE	0	4	0
	(2)NO[c0] + (2)H+[c0] + NADH[c0] <=> H2O[c0] + NAD[c0] + Nitrous oxide[c0]	Nitrogen metabolism	rxn01806_c0	FALSE	FALSE	FALSE	FALSE	FALSE	TRUE	FALSE	TRUE	FALSE	TRUE	FALSE	FALSE	FALSE	FALSE	FALSE	FALSE	FALSE	FALSE	TRUE	0	4	0
	(2)Oxidizedferredoxin[c0] + (2)L-Glutamate[c0] <=> (2)H+[c0] + (2)Reducedferredoxin[c0] + 2-Oxoglutarate[c0] + L-Glutamine[c0]	Nitrogen metabolism	rxn12822_c0	TRUE	TRUE	TRUE	TRUE	TRUE	TRUE	TRUE	FALSE	TRUE	TRUE	TRUE	TRUE	TRUE	TRUE	TRUE	TRUE	TRUE	TRUE	TRUE	4	14	0
	NH3[c0] + (2)H2O[c0] + (3)NAD[c0] <= Nitrite[c0] + (5)H+[c0] + (3)NADH[c0]	Nitrogen metabolism	rxn00568_c0	TRUE	TRUE	TRUE	TRUE	TRUE	TRUE	TRUE	TRUE	TRUE	TRUE	TRUE	TRUE	TRUE	FALSE	TRUE	TRUE	TRUE	TRUE	TRUE	4	14	0
	(3)NADP[c0] + NH3[c0] + (2)H2O[c0] <= Nitrite[c0] + (5)H+[c0] + (3)NADPH[c0]	Nitrogen metabolism	rxn00569_c0	TRUE	TRUE	TRUE	TRUE	TRUE	TRUE	TRUE	TRUE	TRUE	TRUE	TRUE	TRUE	TRUE	FALSE	TRUE	TRUE	TRUE	TRUE	TRUE	4	14	0
	ATP[c0] + H2O[c0] + L-Aspartate[c0] + L-Glutamine[c0] => AMP[c0] + L-Asparagine[c0] + PPi[c0] + L-Glutamate[c0]	Nitrogen metabolism	rxn00416_c0	TRUE	TRUE	TRUE	TRUE	TRUE	TRUE	TRUE	TRUE	TRUE	TRUE	TRUE	TRUE	TRUE	TRUE	TRUE	TRUE	FALSE	TRUE	TRUE	4	14	0
	ATP[c0] + PAN[c0] <=> 4-phosphopantothenate[c0] + ADP[c0]	Pantothenate and CoA biosynthesis	rxn12510_c0	TRUE	TRUE	TRUE	FALSE	FALSE	FALSE	TRUE	FALSE	TRUE	FALSE	TRUE	FALSE	TRUE	FALSE	TRUE	TRUE	FALSE	FALSE	TRUE	3	7	0
	D-Mannonate[c0] => 2-keto-3-deoxygluconate[c0] + H2O[c0]	Pentose and glucuronate interconversions	rxn03885_c0	FALSE	FALSE	FALSE	FALSE	FALSE	FALSE	FALSE	FALSE	FALSE	FALSE	FALSE	FALSE	FALSE	FALSE	FALSE	FALSE	FALSE	TRUE	FALSE	0	1	0
	D-Xylonate[c0] => H2O[c0] + 2-Dehydro-3-deoxy-D-xylonate[c0]	Pentose and glucuronate interconversions	rxn01753_c0	FALSE	FALSE	FALSE	FALSE	FALSE	TRUE	FALSE	FALSE	TRUE	TRUE	FALSE	FALSE	FALSE	FALSE	FALSE	FALSE	FALSE	FALSE	FALSE	0	3	0
	D-Altronate[c0] => 2-keto-3-deoxygluconate[c0] + H2O[c0]	Pentose and glucuronate interconversions	rxn01122_c0	FALSE	TRUE	FALSE	FALSE	TRUE	FALSE	FALSE	TRUE	FALSE	FALSE	FALSE	FALSE	FALSE	FALSE	TRUE	FALSE	FALSE	TRUE	FALSE	1	4	0
	ATP[c0] + D-Lyxulose[c0] <=> D-Xylulose5-phosphate[c0] + ADP[c0]	Pentose and glucuronate interconversions	rxn01199_c0	TRUE	TRUE	TRUE	TRUE	TRUE	TRUE	TRUE	TRUE	TRUE	TRUE	TRUE	TRUE	TRUE	TRUE	TRUE	FALSE	TRUE	TRUE	TRUE	4	14	0
	Xylose[c0] <=> D-Lyxulose[c0]	Pentose and glucuronate interconversions	rxn01044_c0	FALSE	FALSE	FALSE	TRUE	TRUE	FALSE	FALSE	FALSE	FALSE	FALSE	FALSE	FALSE	FALSE	FALSE	TRUE	FALSE	TRUE	FALSE	FALSE	1	3	0
	H2O[c0] + Gluconolactone[c0] => H+[c0] + GLCN[c0]	Pentose phosphate pathway	rxn01107_c0	FALSE	FALSE	FALSE	FALSE	TRUE	TRUE	TRUE	TRUE	TRUE	TRUE	FALSE	TRUE	TRUE	FALSE	TRUE	TRUE	FALSE	TRUE	TRUE	0	12	0
	FAD[c0] + GLCN[c0] <=> 2-Dehydro-D-gluconate[c0] + FADH2[c0]	Pentose phosphate pathway	rxn01279_c0	FALSE	FALSE	FALSE	TRUE	TRUE	FALSE	TRUE	FALSE	FALSE	FALSE	FALSE	TRUE	FALSE	TRUE	TRUE	FALSE	FALSE	FALSE	TRUE	1	6	0
	NAD[c0] + beta-D-Glucose[c0] <=> H+[c0] + NADH[c0] + Gluconolactone[c0]	Pentose phosphate pathway	rxn01108_c0	FALSE	TRUE	FALSE	TRUE	TRUE	TRUE	TRUE	TRUE	FALSE	TRUE	FALSE	FALSE	TRUE	TRUE	TRUE	FALSE	FALSE	FALSE	FALSE	2	8	0
	NADP[c0] + beta-D-Glucose[c0] <=> H+[c0] + Gluconolactone[c0] + NADPH[c0]	Pentose phosphate pathway	rxn01109_c0	FALSE	TRUE	FALSE	TRUE	TRUE	TRUE	TRUE	TRUE	FALSE	TRUE	FALSE	FALSE	TRUE	TRUE	TRUE	FALSE	FALSE	FALSE	FALSE	2	8	0
	2-keto-3-deoxygluconate[c0] + ATP[c0] <=> 2-Keto-3-deoxy-6-phosphogluconate[c0] + ADP[c0]	Pentose phosphate pathway	rxn01123_c0	TRUE	TRUE	TRUE	TRUE	TRUE	TRUE	TRUE	TRUE	TRUE	TRUE	TRUE	TRUE	TRUE	TRUE	TRUE	FALSE	TRUE	TRUE	TRUE	4	14	0
	D-glucose-6-phosphate[c0] <=> beta-D-Glucose 6-phosphate[c0]	Pentose phosphate pathway	rxn01977_c0	TRUE	TRUE	TRUE	TRUE	TRUE	TRUE	TRUE	TRUE	TRUE	TRUE	TRUE	TRUE	TRUE	TRUE	TRUE	FALSE	TRUE	TRUE	TRUE	4	14	0
	GLCN[c0] => 2-keto-3-deoxygluconate[c0] + H2O[c0]	Pentose phosphate pathway	rxn01121_c0	TRUE	TRUE	TRUE	TRUE	FALSE	TRUE	FALSE	FALSE	FALSE	FALSE	FALSE	FALSE	FALSE	FALSE	FALSE	FALSE	FALSE	TRUE	FALSE	4	2	0
	H+[c0] + L-Phenylalanine[c0] => Phenethylamine[c0] + CO2[c0]	Phenylalanine metabolism	rxn00497_c0	FALSE	FALSE	FALSE	FALSE	FALSE	FALSE	TRUE	FALSE	FALSE	FALSE	FALSE	FALSE	FALSE	FALSE	FALSE	FALSE	FALSE	FALSE	FALSE	0	1	0
	H+[c0] + 3-Coumaric acid[c0] + NADH[c0] + O2[c0] => 2,3-dihydroxicinnamic acid[c0] + H2O[c0] + NAD[c0]	Phenylalanine metabolism	rxn04602_c0	FALSE	FALSE	FALSE	FALSE	FALSE	FALSE	FALSE	FALSE	FALSE	TRUE	FALSE	TRUE	TRUE	FALSE	FALSE	FALSE	TRUE	TRUE	FALSE	0	5	0
	H+[c0] + NADH[c0] + O2[c0] + Melilotate[c0] => H2O[c0] + NAD[c0] + 2,3-Dihydroxyphenylpropanoate[c0]	Phenylalanine metabolism	rxn02416_c0	FALSE	FALSE	FALSE	FALSE	FALSE	FALSE	FALSE	FALSE	FALSE	TRUE	FALSE	TRUE	TRUE	FALSE	FALSE	FALSE	TRUE	TRUE	FALSE	0	5	0
	Dihydro-3-coumaric acid[c0] + H+[c0] + NADH[c0] + O2[c0] => H2O[c0] + NAD[c0] + 2,3-Dihydroxyphenylpropanoate[c0]	Phenylalanine metabolism	rxn04601_c0	FALSE	FALSE	FALSE	FALSE	FALSE	FALSE	FALSE	FALSE	FALSE	TRUE	FALSE	TRUE	TRUE	FALSE	FALSE	FALSE	TRUE	TRUE	FALSE	0	5	0
	ATP[c0] + PACT[c0] + CoA[c0] => Phenylacetyl-CoA[c0] + AMP[c0] + PPi[c0]	Phenylalanine metabolism	rxn01842_c0	FALSE	TRUE	FALSE	FALSE	FALSE	TRUE	TRUE	FALSE	TRUE	TRUE	TRUE	FALSE	TRUE	FALSE	FALSE	TRUE	FALSE	FALSE	FALSE	1	7	0
	Pyrroloquinoline-quinone[c0] + Quinate[c0] => 5-Dehydroquinate[c0] + PQQH2[c0]	Phenylalanine, tyrosine and tryptophan biosynthesis	rxn01364_c0	TRUE	FALSE	FALSE	TRUE	TRUE	TRUE	TRUE	TRUE	TRUE	TRUE	TRUE	FALSE	TRUE	TRUE	TRUE	FALSE	TRUE	FALSE	FALSE	2	11	0
	(4)H+[c0] + (4)Fe2+[c0] + O2[c0] <=> (4)fe3[c0] + (2)H2O[c0]	Porphyrin and chlorophyll metabolism	rxn00056_c0	FALSE	FALSE	FALSE	TRUE	TRUE	TRUE	TRUE	FALSE	TRUE	TRUE	FALSE	FALSE	FALSE	TRUE	TRUE	FALSE	FALSE	FALSE	FALSE	1	7	0
	H2O[c0] + (4)Porphobilinogen[c0] => (4)NH3[c0] + Hydroxymethylbilane[c0]	Porphyrin and chlorophyll metabolism	rxn00060_c0	TRUE	TRUE	TRUE	TRUE	TRUE	TRUE	TRUE	TRUE	TRUE	TRUE	TRUE	FALSE	TRUE	TRUE	TRUE	TRUE	TRUE	TRUE	TRUE	4	14	0
	Acetate[c0] + Acetoacetyl-CoA[c0] <=> Acetoacetate[c0] + Acetyl-CoA[c0]	Propanoate metabolism	rxn00990_c0	FALSE	FALSE	FALSE	FALSE	FALSE	FALSE	FALSE	FALSE	TRUE	FALSE	FALSE	FALSE	FALSE	FALSE	FALSE	FALSE	FALSE	FALSE	FALSE	0	1	0
	L-methylmalonyl-CoA[c0] <=> Succinyl-CoA[c0]	Propanoate metabolism	rxn00602_c0	FALSE	FALSE	FALSE	FALSE	FALSE	FALSE	FALSE	FALSE	FALSE	FALSE	TRUE	FALSE	TRUE	FALSE	FALSE	FALSE	FALSE	FALSE	FALSE	0	2	0
	Methylisocitrate[c0] <=> cis-2-Methylaconitate[c0] + H2O[c0]	Propanoate metabolism	rxn03061_c0	TRUE	TRUE	TRUE	TRUE	TRUE	TRUE	TRUE	TRUE	FALSE	TRUE	TRUE	TRUE	TRUE	TRUE	TRUE	TRUE	TRUE	TRUE	TRUE	4	14	0
	ATP[c0] + H2CO3[c0] + Acetyl-CoA[c0] <=> H+[c0] + Phosphate[c0] + ADP[c0] + Malonyl-CoA[c0]	Propanoate metabolism	rxn00533_c0	TRUE	TRUE	TRUE	TRUE	TRUE	TRUE	TRUE	TRUE	TRUE	TRUE	TRUE	TRUE	TRUE	TRUE	TRUE	TRUE	FALSE	TRUE	TRUE	4	14	0
	ATP[c0] + trdrd[c0] => trdox[c0] + H2O[c0] + dATP[c0]	Purine metabolism	rxn05232_c0	FALSE	FALSE	FALSE	FALSE	FALSE	TRUE	FALSE	TRUE	FALSE	TRUE	FALSE	FALSE	FALSE	FALSE	FALSE	FALSE	FALSE	FALSE	TRUE	0	4	0
	GTP[c0] + trdrd[c0] => dGTP[c0] + trdox[c0] + H2O[c0]	Purine metabolism	rxn05234_c0	FALSE	FALSE	FALSE	FALSE	FALSE	TRUE	FALSE	TRUE	FALSE	TRUE	FALSE	FALSE	FALSE	FALSE	FALSE	FALSE	FALSE	FALSE	TRUE	0	4	0
	UTP[c0] + trdrd[c0] => dUTP[c0] + trdox[c0] + H2O[c0]	Pyrimidine metabolism	rxn05236_c0	FALSE	FALSE	FALSE	FALSE	FALSE	TRUE	FALSE	TRUE	FALSE	TRUE	FALSE	FALSE	FALSE	FALSE	FALSE	FALSE	FALSE	FALSE	TRUE	0	4	0
	trdrd[c0] + CTP[c0] => trdox[c0] + H2O[c0] + dCTP[c0]	Pyrimidine metabolism	rxn05235_c0	FALSE	FALSE	FALSE	FALSE	FALSE	TRUE	FALSE	TRUE	FALSE	TRUE	FALSE	FALSE	FALSE	FALSE	FALSE	FALSE	FALSE	FALSE	TRUE	0	4	0
	H+[c0] + Thymidine[c0] + Phosphate[c0] <=> Thymine[c0] + deoxyribose-1-phosphate[c0]	Pyrimidine metabolism	rxn01146_c0	FALSE	FALSE	FALSE	TRUE	TRUE	TRUE	TRUE	TRUE	TRUE	TRUE	FALSE	TRUE	TRUE	TRUE	TRUE	FALSE	TRUE	TRUE	TRUE	1	13	0
	L-Malate[c0] + FAD[c0] <=> Oxaloacetate[c0] + FADH2[c0]	Pyruvate metabolism	rxn00935_c0	FALSE	FALSE	FALSE	FALSE	FALSE	FALSE	FALSE	FALSE	FALSE	FALSE	FALSE	TRUE	FALSE	FALSE	FALSE	TRUE	TRUE	FALSE	FALSE	0	3	0
	(2)H+[c0] + Pyruvate[c0] + Phosphate[c0] + O2[c0] => Acetylphosphate[c0] + CO2[c0] + H2O2[c0]	Pyruvate metabolism	rxn00152_c0	FALSE	FALSE	FALSE	FALSE	TRUE	FALSE	TRUE	FALSE	FALSE	FALSE	FALSE	FALSE	FALSE	TRUE	TRUE	FALSE	FALSE	FALSE	FALSE	0	4	0
	NAD[c0] + CoA[c0] + Acetaldehyde[c0] <=> H+[c0] + NADH[c0] + Acetyl-CoA[c0]	Pyruvate metabolism	rxn00171_c0	FALSE	TRUE	FALSE	FALSE	FALSE	TRUE	FALSE	TRUE	TRUE	TRUE	TRUE	TRUE	TRUE	FALSE	FALSE	TRUE	TRUE	TRUE	TRUE	1	11	0
	Glycerone-phosphate[c0] => H+[c0] + Phosphate[c0] + 2-Oxopropanal[c0]	Pyruvate metabolism	rxn00748_c0	TRUE	TRUE	TRUE	FALSE	FALSE	TRUE	FALSE	TRUE	TRUE	TRUE	TRUE	TRUE	TRUE	FALSE	FALSE	TRUE	TRUE	TRUE	TRUE	3	11	0
	L-Lactate[c0] + NAD[c0] <=> H+[c0] + Pyruvate[c0] + NADH[c0]	Pyruvate metabolism	rxn00499_c0	FALSE	TRUE	TRUE	FALSE	FALSE	TRUE	FALSE	FALSE	TRUE	TRUE	FALSE	FALSE	FALSE	FALSE	FALSE	TRUE	FALSE	FALSE	TRUE	2	5	0
	L-Lactate[c0] + (2)Cytochrome c3+[c0] <=> (2)H+[c0] + Pyruvate[c0] + (2)Cytochrome c2+[c0]	Pyruvate metabolism	rxn00145_c0	FALSE	TRUE	TRUE	FALSE	FALSE	TRUE	FALSE	FALSE	TRUE	TRUE	FALSE	FALSE	FALSE	FALSE	FALSE	TRUE	FALSE	FALSE	TRUE	2	5	0
	L-Lactaldehyde[c0] + H2O[c0] + NAD[c0] <=> (2)H+[c0] + L-Lactate[c0] + NADH[c0]	Pyruvate metabolism	rxn01053_c0	TRUE	TRUE	TRUE	TRUE	FALSE	TRUE	FALSE	TRUE	TRUE	TRUE	TRUE	FALSE	TRUE	FALSE	FALSE	FALSE	FALSE	FALSE	FALSE	4	6	0
	ATP[c0] + H2O[c0] + Selenide[c0] <=> (2)H+[c0] + AMP[c0] + Phosphate[c0] + Selenophosphate[c0]	Selenoamino acid metabolism	rxn02569_c0	TRUE	TRUE	TRUE	TRUE	TRUE	FALSE	TRUE	TRUE	TRUE	FALSE	TRUE	TRUE	TRUE	TRUE	TRUE	TRUE	TRUE	TRUE	TRUE	4	13	0
	Trehalose 6-phosphate[c0] + H2O[c0] <=> D-Glucose[c0] + D-glucose-6-phosphate[c0]	Starch and sucrose metabolism	rxn00606_c0	FALSE	TRUE	TRUE	FALSE	TRUE	TRUE	FALSE	TRUE	FALSE	TRUE	FALSE	TRUE	FALSE	FALSE	TRUE	FALSE	TRUE	TRUE	TRUE	2	9	0
	Glucose-1-phosphate[c0] + CTP[c0] <=> PPi[c0] + CDP-glucose[c0]	Starch and sucrose metabolism	rxn00702_c0	TRUE	FALSE	TRUE	TRUE	TRUE	TRUE	TRUE	TRUE	FALSE	TRUE	FALSE	TRUE	FALSE	TRUE	TRUE	TRUE	TRUE	TRUE	TRUE	3	12	0
	CDP-glucose[c0] => H2O[c0] + CDP-4-dehydro-6-deoxy-D-glucose[c0]	Starch and sucrose metabolism	rxn01750_c0	TRUE	FALSE	TRUE	TRUE	TRUE	TRUE	TRUE	TRUE	FALSE	TRUE	FALSE	TRUE	FALSE	TRUE	TRUE	TRUE	TRUE	TRUE	TRUE	3	12	0
	D-glucose-6-phosphate[c0] <=> D-fructose-6-phosphate[c0]	Starch and sucrose metabolism	rxn00558_c0	TRUE	TRUE	TRUE	TRUE	TRUE	TRUE	TRUE	TRUE	TRUE	TRUE	TRUE	TRUE	TRUE	TRUE	TRUE	FALSE	TRUE	TRUE	TRUE	4	14	0
	D-Glucose[c0] + ATP[c0] <=> D-glucose-6-phosphate[c0] + ADP[c0]	Streptomycin biosynthesis	rxn00216_c0	FALSE	TRUE	TRUE	TRUE	TRUE	TRUE	TRUE	TRUE	TRUE	TRUE	TRUE	TRUE	TRUE	TRUE	TRUE	TRUE	TRUE	TRUE	TRUE	3	15	0
	alpha-Tolualdehyde[c0] + H2O[c0] + NAD[c0] <=> H+[c0] + NADH[c0] + PACT[c0]	Styrene degradation	rxn01840_c0	FALSE	FALSE	FALSE	FALSE	FALSE	FALSE	FALSE	FALSE	FALSE	FALSE	FALSE	FALSE	FALSE	FALSE	FALSE	FALSE	FALSE	TRUE	FALSE	0	1	0
	H+[c0] + H2O[c0] + 2-Phenylacetamide[c0] <=> NH3[c0] + PACT[c0]	Styrene degradation	rxn01843_c0	TRUE	TRUE	TRUE	TRUE	TRUE	TRUE	TRUE	FALSE	TRUE	TRUE	TRUE	FALSE	TRUE	TRUE	TRUE	FALSE	TRUE	FALSE	TRUE	4	11	0
	NH3[c0] + Acrylate[c0] <= H2O[c0] + Acrylamide[c0]	Styrene degradation	rxn03839_c0	TRUE	TRUE	TRUE	TRUE	TRUE	TRUE	TRUE	FALSE	TRUE	TRUE	TRUE	FALSE	TRUE	TRUE	TRUE	FALSE	TRUE	FALSE	TRUE	4	11	0
	Pyruvate[c0] + Acetaldehyde[c0] <=> 4-Hydroxy-2-oxovalerate[c0]	Styrene degradation	rxn00540_c0	TRUE	TRUE	TRUE	TRUE	FALSE	FALSE	TRUE	FALSE	TRUE	FALSE	TRUE	FALSE	TRUE	FALSE	FALSE	TRUE	TRUE	TRUE	TRUE	4	8	0
	H2O[c0] + Oxopent-4-enoate[c0] => 4-Hydroxy-2-oxovalerate[c0]	Styrene degradation	rxn01893_c0	FALSE	FALSE	FALSE	TRUE	FALSE	FALSE	FALSE	FALSE	FALSE	FALSE	FALSE	FALSE	FALSE	FALSE	FALSE	FALSE	FALSE	TRUE	FALSE	1	1	0
	AMP[c0] + FAD[c0] + Sulfite[c0] <= APS[c0] + FADH2[c0]	Sulfur metabolism	rxn11934_c0	TRUE	TRUE	TRUE	TRUE	TRUE	TRUE	TRUE	TRUE	TRUE	TRUE	TRUE	TRUE	TRUE	TRUE	TRUE	TRUE	FALSE	TRUE	TRUE	4	14	0
	Isopentenyldiphosphate[c0] <=> DMAPP[c0]	Terpenoid biosynthesis	rxn00830_c0	FALSE	FALSE	FALSE	FALSE	FALSE	FALSE	FALSE	FALSE	FALSE	FALSE	FALSE	TRUE	FALSE	FALSE	FALSE	FALSE	FALSE	TRUE	FALSE	0	2	0
	Glycine[c0] => (3)H+[c0] + Iminoglycine[c0]	Thiamine metabolism	rxn07295_c0	TRUE	TRUE	TRUE	FALSE	TRUE	TRUE	TRUE	TRUE	TRUE	TRUE	TRUE	TRUE	TRUE	FALSE	TRUE	TRUE	TRUE	TRUE	TRUE	3	14	0
	Thiamine phosphate[c0] + ATP[c0] <=> ADP[c0] + TPP[c0]	Thiamine metabolism	rxn00438_c0	TRUE	TRUE	TRUE	TRUE	TRUE	TRUE	TRUE	TRUE	TRUE	TRUE	TRUE	TRUE	TRUE	TRUE	TRUE	FALSE	TRUE	TRUE	TRUE	4	14	0
	H2O[c0] + Indole-3-acetamide[c0] => NH3[c0] + Indoleacetate[c0]	Tryptophan metabolism	rxn02222_c0	TRUE	TRUE	TRUE	TRUE	TRUE	TRUE	TRUE	FALSE	TRUE	TRUE	TRUE	FALSE	TRUE	TRUE	TRUE	FALSE	TRUE	FALSE	TRUE	4	11	0
	L-Tryptophan[c0] + O2[c0] => H2O[c0] + CO2[c0] + Indole-3-acetamide[c0]	Tryptophan metabolism	rxn00479_c0	FALSE	TRUE	TRUE	FALSE	TRUE	FALSE	FALSE	FALSE	FALSE	FALSE	FALSE	FALSE	FALSE	FALSE	TRUE	FALSE	FALSE	FALSE	FALSE	2	2	0
	L-Tryptophan[c0] + O2[c0] => N-Formylkynurenine[c0]	Tryptophan metabolism	rxn00478_c0	FALSE	TRUE	TRUE	FALSE	FALSE	FALSE	FALSE	FALSE	TRUE	FALSE	FALSE	FALSE	FALSE	FALSE	FALSE	FALSE	TRUE	FALSE	FALSE	2	2	0
	H2O[c0] + 3-Hydroxy-L-kynurenine[c0] => H+[c0] + 3-Hydroxyanthranilate[c0] + L-Alanine[c0]	Tryptophan metabolism	rxn01930_c0	TRUE	TRUE	TRUE	FALSE	FALSE	FALSE	FALSE	FALSE	FALSE	FALSE	FALSE	FALSE	TRUE	FALSE	FALSE	FALSE	TRUE	FALSE	FALSE	3	2	0
	H+[c0] + NADH[c0] + 3-Hydroxyphenylacetate[c0] + O2[c0] => H2O[c0] + Homoprotocatechuate[c0] + NAD[c0]	Tyrosine metabolism	rxn02363_c0	FALSE	FALSE	FALSE	FALSE	FALSE	FALSE	FALSE	FALSE	FALSE	FALSE	FALSE	FALSE	FALSE	FALSE	FALSE	TRUE	FALSE	FALSE	FALSE	0	1	0
	H+[c0] + NADH[c0] + 4-Hydroxyphenylacetate[c0] + O2[c0] => H2O[c0] + Homoprotocatechuate[c0] + NAD[c0]	Tyrosine metabolism	rxn01945_c0	FALSE	FALSE	FALSE	FALSE	FALSE	FALSE	FALSE	FALSE	FALSE	FALSE	FALSE	FALSE	FALSE	FALSE	FALSE	TRUE	FALSE	FALSE	FALSE	0	1	0
	H2O[c0] + NAD[c0] + 5-Carboxymethyl-2-hydroxymuconic semialdehyde[c0] => (2)H+[c0] + 5-Carboxymethyl-2-hydroxymuconate[c0] + NADH[c0]	Tyrosine metabolism	rxn03055_c0	FALSE	FALSE	FALSE	FALSE	FALSE	FALSE	FALSE	FALSE	FALSE	FALSE	FALSE	FALSE	FALSE	FALSE	FALSE	FALSE	FALSE	TRUE	FALSE	0	1	0
	Homoprotocatechuate[c0] + O2[c0] => H+[c0] + 5-Carboxymethyl-2-hydroxymuconic semialdehyde[c0]	Tyrosine metabolism	rxn02366_c0	FALSE	FALSE	FALSE	FALSE	FALSE	FALSE	FALSE	FALSE	FALSE	FALSE	FALSE	FALSE	FALSE	FALSE	FALSE	FALSE	FALSE	TRUE	FALSE	0	1	0
	H2O[c0] + 2-Oxohept-3-enedioate[c0] <= 2,4-Dihydroxyhept-2-enedioate[c0]	Tyrosine metabolism	rxn02883_c0	FALSE	FALSE	FALSE	FALSE	FALSE	FALSE	FALSE	FALSE	FALSE	FALSE	FALSE	FALSE	FALSE	FALSE	FALSE	FALSE	FALSE	TRUE	FALSE	0	1	0
	2-Oxohept-3-enedioate[c0] <= 2-Hydroxyhepta-2,4-dienedioate[c0]	Tyrosine metabolism	rxn02885_c0	FALSE	FALSE	FALSE	FALSE	FALSE	FALSE	FALSE	FALSE	FALSE	FALSE	FALSE	FALSE	FALSE	FALSE	FALSE	FALSE	FALSE	TRUE	FALSE	0	1	0
	H+[c0] + 5-Carboxy-2-oxohept-3-enedioate[c0] => 2-Hydroxyhepta-2,4-dienedioate[c0] + CO2[c0]	Tyrosine metabolism	rxn03041_c0	FALSE	FALSE	FALSE	FALSE	FALSE	FALSE	FALSE	FALSE	FALSE	FALSE	FALSE	FALSE	FALSE	FALSE	FALSE	FALSE	FALSE	TRUE	FALSE	0	1	0
	5-Carboxymethyl-2-hydroxymuconate[c0] <=> 5-Carboxy-2-oxohept-3-enedioate[c0]	Tyrosine metabolism	rxn03040_c0	FALSE	FALSE	FALSE	FALSE	FALSE	FALSE	FALSE	FALSE	FALSE	FALSE	FALSE	FALSE	FALSE	FALSE	FALSE	FALSE	FALSE	TRUE	FALSE	0	1	0
	Tyramine[c0] + H2O[c0] + O2[c0] => NH3[c0] + 4-Hydroxyphenylacetaldehyde[c0] + H2O2[c0]	Tyrosine metabolism	rxn01715_c0	TRUE	TRUE	FALSE	FALSE	FALSE	TRUE	FALSE	FALSE	TRUE	TRUE	TRUE	FALSE	TRUE	FALSE	FALSE	TRUE	FALSE	FALSE	FALSE	2	6	0
	Pyruvate[c0] + 4-Oxobutanoate[c0] <= 2,4-Dihydroxyhept-2-enedioate[c0]	Tyrosine metabolism	rxn01203_c0	TRUE	TRUE	FALSE	FALSE	FALSE	FALSE	FALSE	TRUE	TRUE	FALSE	TRUE	FALSE	FALSE	FALSE	FALSE	FALSE	FALSE	TRUE	FALSE	2	4	0
	H+[c0] + Succinylbenzoyl-CoA[c0] => H2O[c0] + 1,4-Dihydroxy-2-naphthoyl-CoA[c0]	Ubiquinone biosynthesis	rxn05024_c0	FALSE	FALSE	FALSE	FALSE	FALSE	FALSE	FALSE	FALSE	TRUE	FALSE	FALSE	FALSE	FALSE	FALSE	FALSE	FALSE	FALSE	FALSE	FALSE	0	1	0
	S-Adenosyl-L-methionine[c0] + 2-Octaprenyl-6-hydroxyphenol[c0] <=> 2-Octaprenyl-6-methoxyphenol[c0] + H+[c0] + S-Adenosyl-homocysteine[c0]	Ubiquinone biosynthesis	rxn03395_c0	TRUE	TRUE	TRUE	TRUE	FALSE	TRUE	TRUE	TRUE	TRUE	TRUE	TRUE	TRUE	TRUE	FALSE	FALSE	TRUE	TRUE	TRUE	FALSE	4	11	0
	Putrescine[c0] + 2-Oxoglutarate[c0] <=> 4-Aminobutanal[c0] + L-Glutamate[c0]	Urea cycle and metabolism of amino groups	rxn00856_c0	FALSE	FALSE	FALSE	FALSE	FALSE	FALSE	FALSE	FALSE	FALSE	FALSE	FALSE	TRUE	FALSE	FALSE	FALSE	FALSE	FALSE	TRUE	FALSE	0	2	0
	H2O[c0] + L-Arginine[c0] => Urea[c0] + Ornithine[c0]	Urea cycle and metabolism of amino groups	rxn00394_c0	FALSE	FALSE	FALSE	FALSE	TRUE	TRUE	FALSE	FALSE	FALSE	TRUE	FALSE	FALSE	FALSE	FALSE	TRUE	FALSE	FALSE	FALSE	FALSE	0	4	0
	(2)H+[c0] + H2O[c0] + N-Carbamoylputrescine[c0] => Putrescine[c0] + NH3[c0] + CO2[c0]	Urea cycle and metabolism of amino groups	rxn00853_c0	FALSE	FALSE	FALSE	FALSE	FALSE	TRUE	FALSE	TRUE	TRUE	TRUE	FALSE	TRUE	FALSE	FALSE	FALSE	FALSE	TRUE	TRUE	TRUE	0	8	0
	H2O[c0] + 4-Guanidinobutanamide[c0] => 4-Guanidinobutanoate[c0] + NH3[c0]	Urea cycle and metabolism of amino groups	rxn02275_c0	TRUE	TRUE	TRUE	TRUE	TRUE	TRUE	TRUE	FALSE	TRUE	TRUE	TRUE	FALSE	TRUE	TRUE	TRUE	FALSE	TRUE	FALSE	TRUE	4	11	0
	Succinylbenzoyl-CoA[c0] => 1-4-Dihydroxy-2-naphthoate[c0] + CoA[c0]	not identified	rxn02898_c0	FALSE	FALSE	FALSE	FALSE	FALSE	FALSE	FALSE	FALSE	TRUE	FALSE	FALSE	FALSE	FALSE	FALSE	FALSE	FALSE	FALSE	FALSE	FALSE	0	1	0
	(45)ATP[c0] + Prenol-45n teichoic acid[c0] + (45)D-Alanine[c0] => (45)AMP[c0] + Prenol-45n teichoic acid-alanine substituted[c0] + (45)PPi[c0]	not identified	rxn10191_c0	FALSE	FALSE	FALSE	FALSE	FALSE	FALSE	FALSE	FALSE	FALSE	FALSE	FALSE	TRUE	FALSE	FALSE	FALSE	FALSE	FALSE	FALSE	FALSE	0	1	0
	L-Idonate[c0] + NADP[c0] <=> H+[c0] + 5-Dehydrogluconate[c0] + NADPH[c0]	not identified	rxn03954_c0	FALSE	FALSE	FALSE	FALSE	FALSE	FALSE	FALSE	FALSE	FALSE	FALSE	FALSE	FALSE	FALSE	FALSE	FALSE	FALSE	FALSE	TRUE	FALSE	0	1	0
	L-Idonate[c0] + NAD[c0] <=> H+[c0] + NADH[c0] + 5-Dehydrogluconate[c0]	not identified	rxn03953_c0	FALSE	FALSE	FALSE	FALSE	FALSE	FALSE	FALSE	FALSE	FALSE	FALSE	FALSE	FALSE	FALSE	FALSE	FALSE	FALSE	FALSE	TRUE	FALSE	0	1	0
	phospho-heptosyl-phospho-heptosyl-heptosyl-kdo2-lipidA[c0] + CMP-KDO[c0] <=> kdo-phospho-heptosyl-phospho-heptosyl-heptosyl-kdo2-lipidA[c0] + CMP[c0]	not identified	rxn08954_c0	FALSE	FALSE	FALSE	FALSE	FALSE	FALSE	FALSE	FALSE	FALSE	FALSE	FALSE	FALSE	FALSE	FALSE	FALSE	FALSE	FALSE	FALSE	TRUE	0	1	0
	NAD[c0] + CoA[c0] + ACTN[c0] <=> H+[c0] + NADH[c0] + Acetaldehyde[c0] + Acetyl-CoA[c0]	not identified	rxn09953_c0	FALSE	FALSE	FALSE	FALSE	FALSE	FALSE	FALSE	FALSE	FALSE	FALSE	FALSE	FALSE	FALSE	FALSE	FALSE	FALSE	FALSE	FALSE	TRUE	0	1	0
	H2O[c0] + N2[c0] + NAD[c0] <= NADH[c0] + Nitrous oxide[c0]	not identified	rxn11937_c0	FALSE	FALSE	FALSE	FALSE	FALSE	TRUE	FALSE	FALSE	FALSE	TRUE	FALSE	FALSE	FALSE	FALSE	FALSE	FALSE	FALSE	FALSE	TRUE	0	3	0
	L-Malate[c0] + Ubiquinone-8[c0] => Ubiquinol-8[c0] + Oxaloacetate[c0]	not identified	rxn08900_c0	FALSE	FALSE	FALSE	FALSE	FALSE	FALSE	FALSE	FALSE	FALSE	FALSE	FALSE	TRUE	FALSE	FALSE	FALSE	TRUE	TRUE	FALSE	FALSE	0	3	0
	L-Malate[c0] + Menaquinone 8[c0] => Oxaloacetate[c0] + Menaquinol 8[c0]	not identified	rxn08901_c0	FALSE	FALSE	FALSE	FALSE	FALSE	FALSE	FALSE	FALSE	FALSE	FALSE	FALSE	TRUE	FALSE	FALSE	FALSE	TRUE	TRUE	FALSE	FALSE	0	3	0
	H2O[c0] + AIR[c0] <=> (2)H+[c0] + Phosphate[c0] + Toxopyrimidine[c0] + Glycolaldehyde[c0] + (0.5)O2[c0]	not identified	rxn09997_c0	FALSE	FALSE	FALSE	FALSE	TRUE	TRUE	FALSE	TRUE	FALSE	TRUE	FALSE	FALSE	FALSE	FALSE	TRUE	FALSE	FALSE	FALSE	FALSE	0	5	0
	7-methyl-trans-oct-2-enoyl-ACP[c0] + H+[c0] + NADPH[c0] => NADP[c0] + 7-methyl-octanoyl-ACP[c0]	not identified	rxn05391_c0	FALSE	FALSE	FALSE	FALSE	FALSE	FALSE	FALSE	TRUE	TRUE	FALSE	FALSE	TRUE	FALSE	FALSE	FALSE	FALSE	FALSE	TRUE	TRUE	0	5	0
	H+[c0] + 4-methyl-trans-pent-2-enoyl-ACP[c0] + NADPH[c0] => NADP[c0] + 4-methyl-pentanoyl-ACP[c0]	not identified	rxn05412_c0	FALSE	FALSE	FALSE	FALSE	FALSE	FALSE	FALSE	TRUE	TRUE	FALSE	FALSE	TRUE	FALSE	FALSE	FALSE	FALSE	FALSE	TRUE	TRUE	0	5	0
	H+[c0] + 12-methyl-trans-tridec-2-enoyl-ACP[c0] + NADPH[c0] => NADP[c0] + 12-methyl-tridecanoyl-ACP[c0]	not identified	rxn05428_c0	FALSE	FALSE	FALSE	FALSE	FALSE	FALSE	FALSE	TRUE	TRUE	FALSE	FALSE	TRUE	FALSE	FALSE	FALSE	FALSE	FALSE	TRUE	TRUE	0	5	0
	H+[c0] + trans-Octodec-2-enoyl-ACP[c0] + NADPH[c0] => NADP[c0] + Octodecanoyl-ACP[c0]	not identified	rxn05463_c0	FALSE	FALSE	FALSE	FALSE	FALSE	FALSE	FALSE	TRUE	TRUE	FALSE	FALSE	TRUE	FALSE	FALSE	FALSE	FALSE	FALSE	TRUE	TRUE	0	5	0
	H+[c0] + 6-methyl-trans-hept-2-enoyl-ACP[c0] + NADPH[c0] => NADP[c0] + 6-methyl-heptanoyl-ACP[c0]	not identified	rxn05416_c0	FALSE	FALSE	FALSE	FALSE	FALSE	FALSE	FALSE	TRUE	TRUE	FALSE	FALSE	TRUE	FALSE	FALSE	FALSE	FALSE	FALSE	TRUE	TRUE	0	5	0
	14-methyl-trans-pentadec-2-enoyl-ACP[c0] + H+[c0] + NADPH[c0] => 14-methyl-pentadecanoyl-ACP[c0] + NADP[c0]	not identified	rxn05432_c0	FALSE	FALSE	FALSE	FALSE	FALSE	FALSE	FALSE	TRUE	TRUE	FALSE	FALSE	TRUE	FALSE	FALSE	FALSE	FALSE	FALSE	TRUE	TRUE	0	5	0
	H+[c0] + 13-methyl-trans-tetra-dec-2-enoyl-ACP[c0] + NADPH[c0] => 13-methyl-tetra-decanoyl-ACP[c0] + NADP[c0]	not identified	rxn05403_c0	FALSE	FALSE	FALSE	FALSE	FALSE	FALSE	FALSE	TRUE	TRUE	FALSE	FALSE	TRUE	FALSE	FALSE	FALSE	FALSE	FALSE	TRUE	TRUE	0	5	0
	H+[c0] + 4-methyl-trans-hex-2-enoyl-ACP[c0] + NADPH[c0] => NADP[c0] + 4-methyl-hexanoyl-ACP[c0]	not identified	rxn05362_c0	FALSE	FALSE	FALSE	FALSE	FALSE	FALSE	FALSE	TRUE	TRUE	FALSE	FALSE	TRUE	FALSE	FALSE	FALSE	FALSE	FALSE	TRUE	TRUE	0	5	0
	14-methyl-trans-hexa-dec-2-enoyl-ACP[c0] + H+[c0] + NADPH[c0] => 14-methyl-hexa-decanoyl-ACP[c0] + NADP[c0]	not identified	rxn05382_c0	FALSE	FALSE	FALSE	FALSE	FALSE	FALSE	FALSE	TRUE	TRUE	FALSE	FALSE	TRUE	FALSE	FALSE	FALSE	FALSE	FALSE	TRUE	TRUE	0	5	0
	H+[c0] + 15-methyl-trans-hexa-dec-2-enoyl-ACP[c0] + NADPH[c0] => NADP[c0] + 15-methyl-hexa-decanoyl-ACP[c0]	not identified	rxn05407_c0	FALSE	FALSE	FALSE	FALSE	FALSE	FALSE	FALSE	TRUE	TRUE	FALSE	FALSE	TRUE	FALSE	FALSE	FALSE	FALSE	FALSE	TRUE	TRUE	0	5	0
	8-methyl-trans-dec-2-enoyl-ACP[c0] + H+[c0] + NADPH[c0] => 8-methyl-decanoyl-ACP[c0] + NADP[c0]	not identified	rxn05370_c0	FALSE	FALSE	FALSE	FALSE	FALSE	FALSE	FALSE	TRUE	TRUE	FALSE	FALSE	TRUE	FALSE	FALSE	FALSE	FALSE	FALSE	TRUE	TRUE	0	5	0
	H+[c0] + 12-methyl-trans-tetra-dec-2-enoyl-ACP[c0] + NADPH[c0] => 12-methyl-tetra-decanoyl-ACP[c0] + NADP[c0]	not identified	rxn05378_c0	FALSE	FALSE	FALSE	FALSE	FALSE	FALSE	FALSE	TRUE	TRUE	FALSE	FALSE	TRUE	FALSE	FALSE	FALSE	FALSE	FALSE	TRUE	TRUE	0	5	0
	H+[c0] + 5-methyl-trans-hex-2-enoyl-ACP[c0] + NADPH[c0] => NADP[c0] + 5-methyl-hexanoyl-ACP[c0]	not identified	rxn05387_c0	FALSE	FALSE	FALSE	FALSE	FALSE	FALSE	FALSE	TRUE	TRUE	FALSE	FALSE	TRUE	FALSE	FALSE	FALSE	FALSE	FALSE	TRUE	TRUE	0	5	0
	H+[c0] + 10-methyl-trans-dodec-2-enoyl-ACP[c0] + NADPH[c0] => 10-methyl-dodecanoyl-ACP[c0] + NADP[c0]	not identified	rxn05374_c0	FALSE	FALSE	FALSE	FALSE	FALSE	FALSE	FALSE	TRUE	TRUE	FALSE	FALSE	TRUE	FALSE	FALSE	FALSE	FALSE	FALSE	TRUE	TRUE	0	5	0
	H+[c0] + 10-methyl-trans-undec-2-enoyl-ACP[c0] + NADPH[c0] => NADP[c0] + 10-methyl-undecanoyl-ACP[c0]	not identified	rxn05424_c0	FALSE	FALSE	FALSE	FALSE	FALSE	FALSE	FALSE	TRUE	TRUE	FALSE	FALSE	TRUE	FALSE	FALSE	FALSE	FALSE	FALSE	TRUE	TRUE	0	5	0
	H+[c0] + 11-methyl-trans-dodec-2-enoyl-ACP[c0] + NADPH[c0] => NADP[c0] + 11-methyl-dodecanoyl-ACP[c0]	not identified	rxn05399_c0	FALSE	FALSE	FALSE	FALSE	FALSE	FALSE	FALSE	TRUE	TRUE	FALSE	FALSE	TRUE	FALSE	FALSE	FALSE	FALSE	FALSE	TRUE	TRUE	0	5	0
	8-methyl-trans-non-2-enoyl-ACP[c0] + H+[c0] + NADPH[c0] => 8-methyl-nonanoyl-ACP[c0] + NADP[c0]	not identified	rxn05420_c0	FALSE	FALSE	FALSE	FALSE	FALSE	FALSE	FALSE	TRUE	TRUE	FALSE	FALSE	TRUE	FALSE	FALSE	FALSE	FALSE	FALSE	TRUE	TRUE	0	5	0
	H+[c0] + 6-methyl-trans-oct-2-enoyl-ACP[c0] + NADPH[c0] => NADP[c0] + 6-methyl-octanoyl-ACP[c0]	not identified	rxn05366_c0	FALSE	FALSE	FALSE	FALSE	FALSE	FALSE	FALSE	TRUE	TRUE	FALSE	FALSE	TRUE	FALSE	FALSE	FALSE	FALSE	FALSE	TRUE	TRUE	0	5	0
	H+[c0] + 9-methyl-trans-dec-2-enoyl-ACP[c0] + NADPH[c0] => 9-methyl-decanoyl-ACP[c0] + NADP[c0]	not identified	rxn05395_c0	FALSE	FALSE	FALSE	FALSE	FALSE	FALSE	FALSE	TRUE	TRUE	FALSE	FALSE	TRUE	FALSE	FALSE	FALSE	FALSE	FALSE	TRUE	TRUE	0	5	0
	Undecaprenyl diphospho N-acetyl-glucosamine[c0] + UDP-N-acetyl-D-mannosamine[c0] <=> N-Acetyl-beta-D-mannosaminyl-1,4-N-acetyl-D- glucosaminyldiphosphoundecaprenol[c0] + UDP[c0]	not identified	rxn03852_c0	FALSE	FALSE	FALSE	TRUE	FALSE	TRUE	FALSE	TRUE	TRUE	TRUE	FALSE	TRUE	FALSE	FALSE	FALSE	FALSE	FALSE	TRUE	TRUE	1	7	0
	NADP[c0] + GLCN[c0] <=> H+[c0] + 5-Dehydrogluconate[c0] + NADPH[c0]	not identified	rxn01278_c0	FALSE	FALSE	TRUE	FALSE	FALSE	FALSE	TRUE	FALSE	TRUE	FALSE	TRUE	TRUE	FALSE	FALSE	FALSE	FALSE	FALSE	TRUE	FALSE	1	5	0
	NAD[c0] + Octanoyl-CoA[c0] <= H+[c0] + NADH[c0] + (2E)-Octenoyl-CoA[c0]	not identified	rxn10011_c0	FALSE	FALSE	FALSE	TRUE	FALSE	FALSE	TRUE	TRUE	TRUE	FALSE	TRUE	FALSE	FALSE	FALSE	FALSE	TRUE	FALSE	FALSE	FALSE	1	5	0
	Myristoyl-CoA[c0] + NAD[c0] <= H+[c0] + (2E)-Tetradecenoyl-CoA[c0] + NADH[c0]	not identified	rxn10014_c0	FALSE	FALSE	FALSE	TRUE	FALSE	FALSE	TRUE	TRUE	TRUE	FALSE	TRUE	FALSE	FALSE	FALSE	FALSE	TRUE	FALSE	FALSE	FALSE	1	5	0
	H+[c0] + NADH[c0] + (2E)-Hexenoyl-CoA[c0] => NAD[c0] + Hexanoyl-CoA[c0]	not identified	rxn10010_c0	FALSE	FALSE	FALSE	TRUE	FALSE	FALSE	TRUE	TRUE	TRUE	FALSE	TRUE	FALSE	FALSE	FALSE	FALSE	TRUE	FALSE	FALSE	FALSE	1	5	0
	Lauroyl-CoA[c0] + NAD[c0] <= H+[c0] + (2E)-Dodecenoyl-CoA[c0] + NADH[c0]	not identified	rxn10013_c0	FALSE	FALSE	FALSE	TRUE	FALSE	FALSE	TRUE	TRUE	TRUE	FALSE	TRUE	FALSE	FALSE	FALSE	FALSE	TRUE	FALSE	FALSE	FALSE	1	5	0
	Palmitoyl-CoA[c0] + NAD[c0] <= (2E)-Hexadecenoyl-CoA[c0] + H+[c0] + NADH[c0]	not identified	rxn05732_c0	FALSE	FALSE	FALSE	TRUE	FALSE	FALSE	TRUE	TRUE	TRUE	FALSE	TRUE	FALSE	FALSE	FALSE	FALSE	TRUE	FALSE	FALSE	FALSE	1	5	0
	Decanoyl-CoA[c0] + NAD[c0] <= H+[c0] + NADH[c0] + (2E)-Decenoyl-CoA[c0]	not identified	rxn10012_c0	FALSE	FALSE	FALSE	TRUE	FALSE	FALSE	TRUE	TRUE	TRUE	FALSE	TRUE	FALSE	FALSE	FALSE	FALSE	TRUE	FALSE	FALSE	FALSE	1	5	0
	10-Formyltetrahydrofolate[c0] + ATP[c0] + L-Glutamate[c0] => H+[c0] + Phosphate[c0] + ADP[c0] + 10-Formyl-THF-L-glutamate[c0]	not identified	rxn01210_c0	TRUE	FALSE	TRUE	TRUE	TRUE	TRUE	TRUE	TRUE	TRUE	TRUE	TRUE	TRUE	TRUE	TRUE	TRUE	TRUE	TRUE	TRUE	TRUE	3	15	0
	H2O[c0] + Glycerone-phosphate[c0] => H+[c0] + Phosphate[c0] + Glycerone[c0]	not identified	rxn00743_c0	TRUE	FALSE	FALSE	TRUE	TRUE	FALSE	TRUE	FALSE	FALSE	TRUE	FALSE	TRUE	TRUE	TRUE	TRUE	FALSE	FALSE	FALSE	TRUE	2	8	0
	Myristoyllipoteichoic acid (n=24), linked, unsubstituted[c0] + (24)UDP-N-acetylglucosamine[c0] <=> (24)UDP[c0] + Myristoyllipoteichoic acid (n=24), linked, N-acetyl-D-glucosamine[c0]	not identified	rxn10308_c0	TRUE	TRUE	TRUE	TRUE	TRUE	TRUE	TRUE	TRUE	TRUE	TRUE	TRUE	TRUE	TRUE	FALSE	TRUE	TRUE	TRUE	TRUE	TRUE	4	14	0
	(24)UDP-N-acetylglucosamine[c0] + Anteisoheptadecanoyllipoteichoic acid (n=24), linked, unsubstituted[c0] <=> (24)UDP[c0] + Anteisoheptadecanoyllipoteichoic acid (n=24), linked, N-acetyl-D-glucosamine[c0]	not identified	rxn10311_c0	TRUE	TRUE	TRUE	TRUE	TRUE	TRUE	TRUE	TRUE	TRUE	TRUE	TRUE	TRUE	TRUE	FALSE	TRUE	TRUE	TRUE	TRUE	TRUE	4	14	0
	H2O[c0] + Cyanate[c0] => Carbamate[c0]	not identified	rxn05063_c0	TRUE	TRUE	TRUE	TRUE	TRUE	TRUE	TRUE	TRUE	TRUE	TRUE	TRUE	TRUE	TRUE	TRUE	TRUE	FALSE	TRUE	TRUE	TRUE	4	14	0
	Isohexadecanoyllipoteichoic acid (n=24), linked, unsubstituted[c0] + (24)UDP-N-acetylglucosamine[c0] <=> (24)UDP[c0] + Isohexadecanoyllipoteichoic acid (n=24), linked, N-acetyl-D-glucosamine[c0]	not identified	rxn10315_c0	TRUE	TRUE	TRUE	TRUE	TRUE	TRUE	TRUE	TRUE	TRUE	TRUE	TRUE	TRUE	TRUE	FALSE	TRUE	TRUE	TRUE	TRUE	TRUE	4	14	0
	Stearoyllipoteichoic acid (n=24), linked, unsubstituted[c0] + (24)UDP-N-acetylglucosamine[c0] <=> (24)UDP[c0] + Stearoyllipoteichoic acid (n=24), linked, N-acetyl-D-glucosamine[c0]	not identified	rxn10309_c0	TRUE	TRUE	TRUE	TRUE	TRUE	TRUE	TRUE	TRUE	TRUE	TRUE	TRUE	TRUE	TRUE	FALSE	TRUE	TRUE	TRUE	TRUE	TRUE	4	14	0
	H+[c0] + 2,5-diketo-D-gluconate[c0] + NADPH[c0] <=> NADP[c0] + 2-Dehydro-L-gulonate[c0]	not identified	rxn08345_c0	TRUE	TRUE	TRUE	TRUE	TRUE	TRUE	TRUE	TRUE	TRUE	TRUE	TRUE	TRUE	TRUE	TRUE	TRUE	FALSE	TRUE	TRUE	TRUE	4	14	0
	Palmitoyllipoteichoic acid (n=24), linked, unsubstituted[c0] + (24)UDP-N-acetylglucosamine[c0] <=> (24)UDP[c0] + Palmitoyllipoteichoic acid (n=24), linked, N-acetyl-D-glucosamine[c0]	not identified	rxn10307_c0	TRUE	TRUE	TRUE	TRUE	TRUE	TRUE	TRUE	TRUE	TRUE	TRUE	TRUE	TRUE	TRUE	FALSE	TRUE	TRUE	TRUE	TRUE	TRUE	4	14	0
	Isotetradecanoyllipoteichoic acid (n=24), linked, unsubstituted[c0] + (24)UDP-N-acetylglucosamine[c0] <=> (24)UDP[c0] + Isotetradecanoyllipoteichoic acid (n=24), linked, N-acetyl-D-glucosamine[c0]	not identified	rxn10312_c0	TRUE	TRUE	TRUE	TRUE	TRUE	TRUE	TRUE	TRUE	TRUE	TRUE	TRUE	TRUE	TRUE	FALSE	TRUE	TRUE	TRUE	TRUE	TRUE	4	14	0
	Isoheptadecanoyllipoteichoic acid (n=24), linked, unsubstituted[c0] + (24)UDP-N-acetylglucosamine[c0] <=> Isoheptadecanoyllipoteichoic acid (n=24), linked, N-acetyl-D-glucosamine[c0] + (24)UDP[c0]	not identified	rxn10310_c0	TRUE	TRUE	TRUE	TRUE	TRUE	TRUE	TRUE	TRUE	TRUE	TRUE	TRUE	TRUE	TRUE	FALSE	TRUE	TRUE	TRUE	TRUE	TRUE	4	14	0
	Anteisopentadecanoyllipoteichoic acid (n=24), linked, unsubstituted[c0] + (24)UDP-N-acetylglucosamine[c0] <=> (24)UDP[c0] + Anteisopentadecanoyllipoteichoic acid (n=24), linked, N-acetyl-D-glucosamine[c0]	not identified	rxn10314_c0	TRUE	TRUE	TRUE	TRUE	TRUE	TRUE	TRUE	TRUE	TRUE	TRUE	TRUE	TRUE	TRUE	FALSE	TRUE	TRUE	TRUE	TRUE	TRUE	4	14	0
	UDP-N-acetylglucosamine[c0] + Undecaprenylphosphate[c0] <=> UMP[c0] + Undecaprenyl diphospho N-acetyl-glucosamine[c0]	not identified	rxn08040_c0	TRUE	TRUE	TRUE	TRUE	TRUE	TRUE	TRUE	TRUE	TRUE	TRUE	TRUE	TRUE	TRUE	FALSE	TRUE	TRUE	TRUE	TRUE	TRUE	4	14	0
	Isopentadecanoyllipoteichoic acid (n=24), linked, unsubstituted[c0] + (24)UDP-N-acetylglucosamine[c0] <=> Isopentadecanoyllipoteichoic acid (n=24), linked, N-acetyl-D-glucosamine[c0] + (24)UDP[c0]	not identified	rxn10313_c0	TRUE	TRUE	TRUE	TRUE	TRUE	TRUE	TRUE	TRUE	TRUE	TRUE	TRUE	TRUE	TRUE	FALSE	TRUE	TRUE	TRUE	TRUE	TRUE	4	14	0
	H+[c0] + Tartrate[c0] => CO2[c0] + Glycerate[c0]	not identified	rxn01285_c0	TRUE	TRUE	TRUE	FALSE	TRUE	FALSE	FALSE	TRUE	TRUE	FALSE	TRUE	TRUE	TRUE	FALSE	TRUE	FALSE	TRUE	TRUE	TRUE	3	10	0
	2-Octaprenyl-3-methyl-5-hydroxy-6-methoxy-1,4-benzoquinone[c0] + S-Adenosyl-L-methionine[c0] <=> Ubiquinone-8[c0] + S-Adenosyl-homocysteine[c0]	not identified	rxn11946_c0	TRUE	TRUE	TRUE	TRUE	FALSE	TRUE	TRUE	TRUE	TRUE	TRUE	TRUE	TRUE	TRUE	FALSE	FALSE	TRUE	TRUE	TRUE	FALSE	4	11	0
	H2O[c0] + Acetamide[c0] => NH3[c0] + Acetate[c0]	not identified	rxn00231_c0	TRUE	TRUE	TRUE	TRUE	TRUE	TRUE	TRUE	FALSE	TRUE	TRUE	TRUE	FALSE	TRUE	TRUE	TRUE	FALSE	TRUE	FALSE	TRUE	4	11	0
	Ubiquinone-8[c0] + L-Lactate[c0] => Ubiquinol-8[c0] + Pyruvate[c0]	not identified	rxn08792_c0	FALSE	TRUE	TRUE	FALSE	FALSE	TRUE	FALSE	FALSE	TRUE	TRUE	FALSE	FALSE	FALSE	FALSE	FALSE	TRUE	FALSE	FALSE	TRUE	2	5	0
	L-Lactate[c0] + Menaquinone 8[c0] => Pyruvate[c0] + Menaquinol 8[c0]	not identified	rxn08793_c0	FALSE	TRUE	TRUE	FALSE	FALSE	TRUE	FALSE	FALSE	TRUE	TRUE	FALSE	FALSE	FALSE	FALSE	FALSE	TRUE	FALSE	FALSE	TRUE	2	5	0
	H2O[c0] + DKDI[c0] => H+[c0] + DKH[c0]	not identified	rxn03931_c0	FALSE	TRUE	TRUE	TRUE	FALSE	TRUE	FALSE	TRUE	TRUE	FALSE	FALSE	TRUE	FALSE	FALSE	FALSE	FALSE	TRUE	TRUE	TRUE	3	7	0
	Peptidoglycan polymer (n-1 subunits)[c0] + Prenol-45n teichoic acid-glucose substituted[c0] <=> glycerol teichoic acid (n=45), linked, glucose substituted[c0] + Undecaprenylphosphate[c0]	not identified	rxn10195_c0	TRUE	TRUE	TRUE	TRUE	TRUE	FALSE	TRUE	TRUE	FALSE	FALSE	TRUE	TRUE	TRUE	TRUE	TRUE	TRUE	FALSE	FALSE	FALSE	4	9	0
	Peptidoglycan polymer (n-1 subunits)[c0] + Prenol-45n teichoic acid[c0] <=> glycerol teichoic acid (n=45), linked, unsubstituted[c0] + Undecaprenylphosphate[c0]	not identified	rxn10194_c0	TRUE	TRUE	TRUE	TRUE	TRUE	FALSE	TRUE	TRUE	FALSE	FALSE	TRUE	TRUE	TRUE	TRUE	TRUE	TRUE	FALSE	FALSE	FALSE	4	9	0
	Peptidoglycan polymer (n-1 subunits)[c0] + Prenol-45n teichoic acid-alanine substituted[c0] <=> glycerol teichoic acid (n=45), linked, D-ala substituted[c0] + Undecaprenylphosphate[c0]	not identified	rxn10196_c0	TRUE	TRUE	TRUE	TRUE	TRUE	FALSE	TRUE	TRUE	FALSE	FALSE	TRUE	TRUE	TRUE	TRUE	TRUE	TRUE	FALSE	FALSE	FALSE	4	9	0
	tricarballylate[c0] + Ubiquinone-8[c0] <=> Ubiquinol-8[c0] + cis-Aconitate[c0]	not identified	rxn12500_c0	FALSE	TRUE	FALSE	FALSE	FALSE	FALSE	FALSE	FALSE	FALSE	FALSE	TRUE	FALSE	FALSE	FALSE	FALSE	FALSE	FALSE	FALSE	FALSE	1	1	0
	H+[e0] + (CH3)3NO[e0] + 2-Demethylmenaquinol 8[c0] <=> (CH3)3N[e0] + H2O[e0] + 2-Demethylmenaquinone 8[c0]	not identified	rxn10128_c0	FALSE	FALSE	FALSE	FALSE	FALSE	FALSE	TRUE	FALSE	FALSE	FALSE	FALSE	FALSE	FALSE	FALSE	FALSE	FALSE	FALSE	FALSE	FALSE	0	1	1
	H+[e0] + (CH3)3NO[e0] + Menaquinol 8[c0] <=> (CH3)3N[e0] + H2O[e0] + Menaquinone 8[c0]	not identified	rxn10127_c0	FALSE	FALSE	FALSE	FALSE	FALSE	FALSE	TRUE	FALSE	FALSE	FALSE	FALSE	FALSE	FALSE	FALSE	FALSE	FALSE	FALSE	FALSE	FALSE	0	1	1
	H+[e0] + BET[e0] <=> H+[c0] + BET[c0]	not identified	rxn05579_c0	FALSE	FALSE	FALSE	FALSE	FALSE	FALSE	FALSE	FALSE	TRUE	FALSE	FALSE	FALSE	FALSE	FALSE	FALSE	FALSE	FALSE	FALSE	FALSE	0	1	1
	(3)H+[c0] + NADH[c0] + Menaquinone 8[c0] => (2)H+[e0] + NAD[c0] + Menaquinol 8[c0]	not identified	rxn10123_c0	FALSE	FALSE	FALSE	FALSE	FALSE	FALSE	FALSE	FALSE	TRUE	FALSE	FALSE	FALSE	FALSE	FALSE	FALSE	FALSE	FALSE	FALSE	FALSE	0	1	1
	(3.8)H+[c0] + NADH[c0] + 2-Demethylmenaquinone 8[c0] <=> (2.8)H+[e0] + NAD[c0] + 2-Demethylmenaquinol 8[c0]	not identified	rxn10124_c0	FALSE	FALSE	FALSE	FALSE	FALSE	FALSE	FALSE	FALSE	TRUE	FALSE	FALSE	FALSE	FALSE	FALSE	FALSE	FALSE	FALSE	FALSE	FALSE	0	1	1
	H+[e0] + Phenylpropanoate[e0] <=> H+[c0] + Phenylpropanoate[c0]	not identified	rxn10133_c0	FALSE	FALSE	FALSE	FALSE	FALSE	FALSE	FALSE	FALSE	FALSE	FALSE	FALSE	FALSE	FALSE	TRUE	FALSE	FALSE	FALSE	FALSE	FALSE	0	1	1
	L-Inositol[e0] + H+[e0] <=> L-Inositol[c0] + H+[c0]	not identified	rxn05593_c0	FALSE	FALSE	FALSE	FALSE	FALSE	FALSE	FALSE	FALSE	FALSE	FALSE	FALSE	FALSE	FALSE	FALSE	FALSE	FALSE	FALSE	TRUE	FALSE	0	1	1
	H+[e0] + L-Aspartate[e0] <=> H+[c0] + L-Aspartate[c0]	not identified	rxn05217_c0	FALSE	FALSE	FALSE	FALSE	FALSE	FALSE	TRUE	TRUE	FALSE	FALSE	FALSE	TRUE	FALSE	FALSE	FALSE	FALSE	FALSE	FALSE	FALSE	0	3	1
	D-Galactonate[e0] + H+[e0] <=> D-Galactonate[c0] + H+[c0]	not identified	rxn10160_c0	FALSE	FALSE	FALSE	FALSE	FALSE	FALSE	FALSE	FALSE	TRUE	FALSE	FALSE	FALSE	FALSE	FALSE	FALSE	TRUE	FALSE	TRUE	TRUE	0	4	1
	H+[e0] + L-Glutamate[e0] <=> H+[c0] + L-Glutamate[c0]	not identified	rxn05297_c0	FALSE	FALSE	FALSE	FALSE	FALSE	FALSE	TRUE	TRUE	TRUE	FALSE	TRUE	TRUE	FALSE	FALSE	FALSE	FALSE	TRUE	TRUE	FALSE	0	7	1
	H+[e0] + Mn2+[e0] => H+[c0] + Mn2+[c0]	not identified	rxn05618_c0	FALSE	FALSE	FALSE	TRUE	TRUE	TRUE	TRUE	FALSE	TRUE	TRUE	FALSE	TRUE	FALSE	TRUE	TRUE	TRUE	TRUE	FALSE	FALSE	1	10	1
	fe3[e0] => fe3[c0]	not identified	rxn05292_c0	FALSE	FALSE	FALSE	TRUE	TRUE	TRUE	TRUE	FALSE	TRUE	TRUE	FALSE	TRUE	FALSE	TRUE	TRUE	FALSE	TRUE	TRUE	FALSE	1	10	1
	H+[e0] + Ca2+[c0] <=> H+[c0] + Ca2+[e0]	not identified	rxn05514_c0	FALSE	FALSE	FALSE	TRUE	TRUE	TRUE	TRUE	FALSE	TRUE	FALSE	FALSE	FALSE	TRUE	TRUE	TRUE	TRUE	FALSE	FALSE	TRUE	1	9	1
	fe3[e0] + (2)Citrate[e0] + ATP[c0] + H2O[c0] => fe3[c0] + H+[c0] + (2)Citrate[c0] + Phosphate[c0] + ADP[c0]	not identified	rxn05557_c0	FALSE	TRUE	FALSE	FALSE	FALSE	TRUE	FALSE	TRUE	FALSE	TRUE	TRUE	TRUE	FALSE	TRUE	FALSE	FALSE	FALSE	FALSE	TRUE	1	7	1
	Fe(III)dicitrate[e0] + ATP[c0] + H2O[c0] => Fe(III)dicitrate[c0] + H+[c0] + Phosphate[c0] + ADP[c0]	not identified	rxn05189_c0	FALSE	TRUE	FALSE	FALSE	FALSE	TRUE	FALSE	TRUE	FALSE	TRUE	TRUE	TRUE	FALSE	TRUE	FALSE	FALSE	FALSE	FALSE	TRUE	1	7	1
	ATP[c0] + H2O[c0] + Nitrate[e0] => H+[c0] + Phosphate[c0] + Nitrate[c0] + ADP[c0]	not identified	rxn05171_c0	FALSE	FALSE	TRUE	TRUE	TRUE	TRUE	TRUE	TRUE	TRUE	TRUE	FALSE	TRUE	FALSE	TRUE	TRUE	TRUE	TRUE	TRUE	TRUE	2	13	1
	Arsenite[c0] <=> Arsenite[e0]	not identified	rxn05507_c0	TRUE	FALSE	FALSE	TRUE	TRUE	TRUE	TRUE	FALSE	TRUE	TRUE	TRUE	FALSE	TRUE	TRUE	TRUE	TRUE	TRUE	FALSE	TRUE	2	12	1
	H+[e0] + Fumarate[e0] <=> H+[c0] + Fumarate[c0]	not identified	rxn05561_c0	TRUE	TRUE	FALSE	FALSE	TRUE	TRUE	TRUE	TRUE	TRUE	TRUE	TRUE	TRUE	FALSE	FALSE	TRUE	TRUE	TRUE	TRUE	FALSE	2	12	1
	H+[e0] + Succinate[e0] <=> H+[c0] + Succinate[c0]	not identified	rxn05654_c0	TRUE	TRUE	FALSE	FALSE	TRUE	TRUE	TRUE	TRUE	TRUE	TRUE	TRUE	TRUE	FALSE	FALSE	TRUE	TRUE	TRUE	TRUE	FALSE	2	12	1
	Arsenate[c0] => Arsenate[e0]	not identified	rxn05506_c0	TRUE	FALSE	FALSE	TRUE	TRUE	TRUE	TRUE	FALSE	TRUE	TRUE	TRUE	FALSE	TRUE	TRUE	TRUE	TRUE	TRUE	FALSE	TRUE	2	12	1
	ATP[c0] + H2O[c0] + Maltohexaose[e0] => H+[c0] + Phosphate[c0] + Maltohexaose[c0] + ADP[c0]	not identified	rxn10174_c0	FALSE	TRUE	TRUE	FALSE	TRUE	TRUE	FALSE	TRUE	FALSE	TRUE	TRUE	TRUE	FALSE	FALSE	TRUE	FALSE	TRUE	TRUE	TRUE	2	10	1
	ATP[c0] + H2O[c0] + Amylotriose[e0] => H+[c0] + Phosphate[c0] + ADP[c0] + Amylotriose[c0]	not identified	rxn05608_c0	FALSE	TRUE	TRUE	FALSE	TRUE	TRUE	FALSE	TRUE	FALSE	TRUE	TRUE	TRUE	FALSE	FALSE	TRUE	FALSE	TRUE	TRUE	TRUE	2	10	1
	ATP[c0] + Maltose[e0] + H2O[c0] => H+[c0] + Maltose[c0] + Phosphate[c0] + ADP[c0]	not identified	rxn05170_c0	FALSE	TRUE	TRUE	FALSE	TRUE	TRUE	FALSE	TRUE	FALSE	TRUE	TRUE	TRUE	FALSE	FALSE	TRUE	FALSE	TRUE	TRUE	TRUE	2	10	1
	ATP[c0] + H2O[c0] + L-Arabinose[e0] => H+[c0] + Phosphate[c0] + L-Arabinose[c0] + ADP[c0]	not identified	rxn05173_c0	TRUE	FALSE	TRUE	TRUE	TRUE	TRUE	TRUE	TRUE	TRUE	TRUE	TRUE	TRUE	TRUE	TRUE	TRUE	TRUE	TRUE	TRUE	TRUE	3	15	1
	Xylose[e0] + ATP[c0] + H2O[c0] => Xylose[c0] + H+[c0] + Phosphate[c0] + ADP[c0]	not identified	rxn05167_c0	FALSE	FALSE	FALSE	TRUE	TRUE	FALSE	FALSE	FALSE	FALSE	FALSE	TRUE	FALSE	FALSE	FALSE	TRUE	FALSE	TRUE	FALSE	FALSE	1	4	1
	Butyrate[e0] + H+[e0] <=> Butyrate[c0] + H+[c0]	not identified	rxn05683_c0	TRUE	FALSE	TRUE	TRUE	TRUE	TRUE	TRUE	FALSE	TRUE	TRUE	TRUE	FALSE	TRUE	TRUE	TRUE	TRUE	TRUE	FALSE	TRUE	3	12	1
	H+[e0] + Acetoacetate[e0] <=> H+[c0] + Acetoacetate[c0]	not identified	rxn05484_c0	TRUE	FALSE	TRUE	TRUE	TRUE	TRUE	TRUE	FALSE	TRUE	TRUE	TRUE	FALSE	TRUE	TRUE	TRUE	TRUE	TRUE	FALSE	TRUE	3	12	1
	Na+[e0] + L-Glutamate[e0] <=> Na+[c0] + L-Glutamate[c0]	not identified	rxn05298_c0	TRUE	TRUE	TRUE	FALSE	TRUE	FALSE	FALSE	FALSE	TRUE	TRUE	TRUE	TRUE	TRUE	TRUE	TRUE	TRUE	TRUE	TRUE	FALSE	3	11	1
	(2)H+[c0] + Nitrate[c0] + Menaquinol 8[c0] <=> Nitrite[c0] + (2)H+[e0] + H2O[c0] + Menaquinone 8[c0]	not identified	rxn10121_c0	TRUE	TRUE	TRUE	TRUE	TRUE	TRUE	TRUE	TRUE	TRUE	TRUE	TRUE	TRUE	TRUE	FALSE	TRUE	TRUE	TRUE	TRUE	TRUE	4	14	1
	(2)H+[c0] + Ubiquinol-8[c0] + Nitrate[c0] => Nitrite[c0] + (2)H+[e0] + H2O[c0] + Ubiquinone-8[c0]	not identified	rxn10120_c0	TRUE	TRUE	TRUE	TRUE	TRUE	TRUE	TRUE	TRUE	TRUE	TRUE	TRUE	TRUE	TRUE	FALSE	TRUE	TRUE	TRUE	TRUE	TRUE	4	14	1
	(3)H+[c0] + Ubiquinone-8[c0] + Formate[c0] => (2)H+[e0] + Ubiquinol-8[c0] + CO2[c0]	not identified	rxn10114_c0	TRUE	TRUE	TRUE	TRUE	TRUE	FALSE	TRUE	TRUE	TRUE	FALSE	TRUE	TRUE	TRUE	TRUE	TRUE	TRUE	TRUE	TRUE	TRUE	4	13	1
	ATP[c0] + H2O[c0] + L-Glutamine[e0] => H+[c0] + Phosphate[c0] + ADP[c0] + L-Glutamine[c0]	not identified	rxn05155_c0	TRUE	TRUE	TRUE	TRUE	TRUE	TRUE	TRUE	TRUE	FALSE	TRUE	TRUE	TRUE	TRUE	TRUE	TRUE	FALSE	TRUE	TRUE	TRUE	4	13	1
	Putrescine[e0] + Ornithine[c0] <=> Putrescine[c0] + Ornithine[e0]	not identified	rxn10182_c0	TRUE	TRUE	TRUE	FALSE	FALSE	FALSE	FALSE	TRUE	TRUE	FALSE	TRUE	TRUE	TRUE	FALSE	FALSE	TRUE	FALSE	TRUE	TRUE	3	8	1
	Putrescine[e0] + H+[e0] => Putrescine[c0] + H+[c0]	not identified	rxn05687_c0	TRUE	TRUE	TRUE	FALSE	FALSE	FALSE	FALSE	TRUE	TRUE	FALSE	TRUE	TRUE	TRUE	FALSE	FALSE	TRUE	FALSE	TRUE	TRUE	3	8	1
	H+[e0] + K+[e0] + Zn2+[c0] <=> H+[c0] + K+[c0] + Zn2+[e0]	not identified	rxn05315_c0	TRUE	TRUE	TRUE	FALSE	FALSE	TRUE	FALSE	FALSE	FALSE	TRUE	TRUE	FALSE	TRUE	TRUE	FALSE	FALSE	TRUE	FALSE	TRUE	3	7	1
	L-Malate[e0] + H+[e0] <=> L-Malate[c0] + H+[c0]	not identified	rxn05605_c0	TRUE	TRUE	TRUE	FALSE	FALSE	TRUE	FALSE	TRUE	FALSE	TRUE	TRUE	TRUE	FALSE	FALSE	FALSE	FALSE	TRUE	TRUE	FALSE	3	7	1
	H+[e0] + Cd2+[c0] + K+[e0] <=> H+[c0] + Cd2+[e0] + K+[c0]	not identified	rxn05517_c0	TRUE	TRUE	TRUE	FALSE	FALSE	TRUE	FALSE	FALSE	FALSE	TRUE	TRUE	FALSE	TRUE	TRUE	FALSE	FALSE	TRUE	FALSE	TRUE	3	7	1
	2-keto-3-deoxygluconate[e0] + H+[e0] <=> 2-keto-3-deoxygluconate[c0] + H+[c0]	not identified	rxn05681_c0	FALSE	TRUE	FALSE	FALSE	FALSE	TRUE	FALSE	FALSE	FALSE	TRUE	FALSE	FALSE	FALSE	FALSE	FALSE	FALSE	FALSE	FALSE	FALSE	1	2	1
	Citrate[e0] + H+[e0] <=> Citrate[c0] + H+[c0]	not identified	rxn05211_c0	FALSE	TRUE	FALSE	FALSE	FALSE	TRUE	FALSE	TRUE	FALSE	FALSE	FALSE	FALSE	FALSE	FALSE	FALSE	FALSE	FALSE	FALSE	FALSE	1	2	1
	H+[e0] + 2-Oxoglutarate[e0] <=> H+[c0] + 2-Oxoglutarate[c0]	not identified	rxn05493_c0	TRUE	TRUE	TRUE	FALSE	FALSE	FALSE	FALSE	TRUE	TRUE	FALSE	TRUE	FALSE	TRUE	FALSE	FALSE	FALSE	FALSE	TRUE	TRUE	3	6	1
	H+[e0] + L-Arginine[e0] <=> H+[c0] + L-Arginine[c0]	not identified	rxn05303_c0	TRUE	TRUE	TRUE	FALSE	FALSE	FALSE	FALSE	FALSE	TRUE	FALSE	TRUE	FALSE	TRUE	FALSE	FALSE	TRUE	FALSE	FALSE	FALSE	3	4	1
	L-Malate[e0] + Na+[e0] <=> L-Malate[c0] + Na+[c0]	not identified	rxn05207_c0	FALSE	TRUE	TRUE	FALSE	FALSE	FALSE	FALSE	FALSE	FALSE	FALSE	FALSE	FALSE	FALSE	FALSE	FALSE	FALSE	FALSE	FALSE	FALSE	2	0	1

## Sheet: coreReactions
	KBase reaction ID	Reaction Name	Reaction
	rxn12008_c0	rxn12008_c0	Farnesylfarnesylgeraniol[c0] + PPi[c0] <= Isopentenyldiphosphate[c0] + all-trans-Heptaprenyl diphosphate[c0]
	rxn00541_c0	L-Threonine acetaldehyde-lyase_c0	L-Threonine[c0] <=> Acetaldehyde[c0] + Glycine[c0]
	rxn05572_c0	glucarate transport in via proton symport_c0	H+[e0] + D-Glucarate[e0] <=> H+[c0] + D-Glucarate[c0]
	rxn10215_c0	anteisoheptadecanoyl-1-acylglycerol-3-phosphate O-acyltransferase_c0	1-anteisoheptadecanoyl-sn-glycerol 3-phosphate[c0] + fa12coa[c0] => 1,2-dianteisoheptadecanoyl-sn-glycerol 3-phosphate[c0] + CoA[c0]
	rxn02483_c0	4-Carboxymuconolactone carboxy-lyase_c0	H+[c0] + 4-Carboxymuconolactone[c0] => 3-oxoadipate-enol-lactone[c0] + CO2[c0]
	rxn00802_c0	N-(L-Argininosuccinate) arginie-lyase_c0	L-Argininosuccinate[c0] <=> Fumarate[c0] + L-Arginine[c0]
	rxn03638_c0	Acetyl-CoA:D-glucosamine-1-phosphate N-acetyltransferase_c0	D-Glucosamine1-phosphate[c0] + Acetyl-CoA[c0] => H+[c0] + N-Acetyl-D-glucosamine1-phosphate[c0] + CoA[c0]
	rxn08851_c0	Lysophospholipase L2 (2-acylglycerophosphoglycerol, n-C18:1)_c0	H2O[c0] + 2-Acyl-sn-glycero-3-phosphoglycerol octadec-11-enoyl[c0] <=> octadecenoate[c0] + H+[c0] + Glycerophosphoglycerol[c0]
	rxn06078_c0	O-Acetyl-L-homoserine acetate-lyase (adding methanethiol)_c0	O-Acetyl-L-homoserine[c0] + H2S2O3[c0] + trdrd[c0] => trdox[c0] + Homocysteine[c0] + Sulfite[c0] + Acetate[c0]
	rxn00868_c0	Butanoyl-CoA:(acceptor) 2,3-oxidoreductase_c0	NAD[c0] + Butyryl-CoA[c0] <= H+[c0] + Crotonyl-CoA[c0] + NADH[c0]
	rxn01675_c0	dTTP:alpha-D-glucose-1-phosphate thymidylyltransferase_c0	TTP[c0] + Glucose-1-phosphate[c0] <=> dTDPglucose[c0] + PPi[c0]
	rxn12636_c0	aminopeptidase_c0	H+[c0] + H2O[c0] + met-L-ala-L[c0] <=> L-Methionine[c0] + L-Alanine[c0]
	rxn12644_c0	aminopeptidase_c0	H2O[c0] + ala-L-Thr-L[c0] <=> L-Threonine[c0] + L-Alanine[c0]
	rxn05536_c0	Dipeptide transport via ABC system (met-ala)_c0	ATP[c0] + H2O[c0] + met-L-ala-L[e0] => H+[c0] + Phosphate[c0] + ADP[c0] + met-L-ala-L[c0]
	rxn03422_c0	N-succinyl-L-glutamate 5-semialdehyde:NAD+ oxidoreductase_c0	H2O[c0] + NAD[c0] + N-Succinyl-L-glutamate 5-semialdehyde[c0] => (2)H+[c0] + N-Succinyl-L-glutamate[c0] + NADH[c0]
	rxn08800_c0	Lysophospholipase L1 (2-acylglycerophosphotidate, n-C16:1) (periplasm)_c0	H2O[c0] + 1-hexadec-9-enoyl-sn-glycerol 3-phosphate[c0] <=> H+[c0] + hexadecenoate[c0] + Glycerol-3-phosphate[c0]
	rxn06729_c0	(R)-3-Hydroxytetradecanoly-[acyl-carrier-protein]:UDP-N-acetyl-_c0	HMA[c0] + UDP-N-acetylglucosamine[c0] => ACP[c0] + UDP-3-O-(beta-hydroxymyristoyl)-N-acetylglucosamine[c0]
	rxn01387_c0	Isocitrate:NADP+ oxidoreductase (decarboxylating)_c0	NADP[c0] + Isocitrate[c0] <=> H+[c0] + Oxalosuccinate[c0] + NADPH[c0]
	rxn00124_c0	ATP:pyridoxal 5'-phosphotransferase_c0	Pyridoxal[c0] + ATP[c0] <=> Pyridoxal phosphate[c0] + ADP[c0]
	rxn08823_c0	Lysophospholipase L2 (2-acylglycerophosphotidate, n-C18:1)_c0	2-octadec-11-enoyl-sn-glycerol 3-phosphate[c0] + H2O[c0] <=> octadecenoate[c0] + H+[c0] + Glycerol-3-phosphate[c0]
	rxn05168_c0	L-Valine-ABC transport_c0	ATP[c0] + H2O[c0] + L-Valine[e0] => H+[c0] + Phosphate[c0] + ADP[c0] + L-Valine[c0]
	rxn00433_c0	Sarcosine:oxygen oxidoreductase (demethylating)_c0	H2O[c0] + Sarcosine[c0] + O2[c0] => Formaldehyde[c0] + H2O2[c0] + Glycine[c0]
	rxn05544_c0	Dipeptide transport via ABC system (ala-leu)_c0	ATP[c0] + H2O[c0] + Ala-Leu[e0] => H+[c0] + Phosphate[c0] + ADP[c0] + Ala-Leu[c0]
	rxn05549_c0	Deoxyribose transport via ABC system_c0	ATP[c0] + H2O[c0] + Thyminose[e0] => H+[c0] + Phosphate[c0] + Thyminose[c0] + ADP[c0]
	rxn05330_c0	(3R)-3-Hydroxybutanoyl-[acyl-carrier-protein] hydro-lyase_c0	D-3-Hydroxyhexanoyl-[acp][c0] <=> H2O[c0] + (2E)-Hexenoyl-[acp][c0]
	rxn03910_c0	2-Phospho-4-(cytidine 5'-diphospho)-2-C-methyl-D-erythritol_c0	2-phospho-4--cytidine5-diphospho-2-C-methyl-D-erythritol[c0] <=> 2-C-methyl-D-erythritol2-4-cyclodiphosphate[c0] + CMP[c0]
	rxn03492_c0	precorrin-6Y:NADP+ oxidoreductase_c0	NADP[c0] + Precorrin 6B[c0] <=> Precorrin 6A[c0] + H+[c0] + NADPH[c0]
	rxn05616_c0	magnesium transport in/out via permease (no H+)_c0	Mg[c0] <=> Mg[e0]
	rxn02345_c0	(S)-3-Hydroxybutanoyl-CoA 3-epimerase_c0	(S)-3-Hydroxybutyryl-CoA[c0] <=> (R)-3-Hydroxybutanoyl-CoA[c0]
	rxn01134_c0	Maltose alpha-D-glucosylmutase_c0	Maltose[c0] <=> TRHL[c0]
	rxn08527_c0	fumarate reductase_c0	Fumarate[c0] + Menaquinol 8[c0] <=> Succinate[c0] + Menaquinone 8[c0]
	rxn12848_c0	Gly-Cys ABC transporters_c0	ATP[c0] + Gly-Cys[e0] + H2O[c0] => Gly-Cys[c0] + Phosphate[c0] + ADP[c0]
	rxn08471_c0	FMNH2-dependent monooxygenase (sulfoacetate)_c0	Sulfoacetate[c0] + FMNH2[c0] + O2[c0] => H2O[c0] + Glyoxalate[c0] + Sulfite[c0] + FMN[c0]
	rxn02212_c0	2-Dehydro-3-deoxy-D-arabino-heptonate 7-phosphate phosphate-lyase_c0	DAHP[c0] => H+[c0] + 5-Dehydroquinate[c0] + Phosphate[c0]
	rxn03419_c0	Formamidopyrimidine nucleoside triphosphate 7,8-8,9-dihydrolase_c0	H2O[c0] + Formamidopyrimidine nucleoside triphosphate[c0] <=> H+[c0] + 2,5-Diaminopyrimidine nucleoside triphosphate[c0] + Formate[c0]
	rxn05408_c0	2-methylpropionyl-CoA:[acyl-carrier-protein] transferase_c0	ACP[c0] + Isobutyryl-CoA[c0] <=> CoA[c0] + isobutyryl-ACP[c0]
	rxn02160_c0	L-Histidinol-phosphate phosphohydrolase_c0	H2O[c0] + L-histidinol-phosphate[c0] => L-Histidinol[c0] + H+[c0] + Phosphate[c0]
	rxn10125_c0	NAD(P) transhydrogenase_c0	(2)H+[e0] + NADP[c0] + NADH[c0] <=> (2)H+[c0] + NAD[c0] + NADPH[c0]
	rxn05614_c0	L-methionine R-oxide transport via ABC system_c0	ATP[c0] + H2O[c0] + L-methionine R-oxide[e0] => H+[c0] + Phosphate[c0] + L-methionine R-oxide[c0] + ADP[c0]
	rxn03052_c0	5-Methyltetrahydropteroyltri-L-glutamate:L-homocysteine_c0	Homocysteine[c0] + 5-Methyltetrahydropteroyltri-L-glutamate[c0] <=> Tetrahydropteroyltri-L-glutamate[c0] + L-Methionine[c0]
	rxn09692_c0	choline transport via proton symport_c0	H+[e0] + Choline[e0] <=> H+[c0] + Choline[c0]
	rxn00883_c0	1D-myo-Inositol 3-phosphate phosphahydrolase_c0	Inositol 3-phosphate[c0] + H2O[c0] => L-Inositol[c0] + H+[c0] + Phosphate[c0]
	rxn01923_c0	2-Methylpropanoyl-CoA:oxygen 2,3-oxidoreductase_c0	(2)Isobutyryl-CoA[c0] + O2[c0] => (2)Methacrylyl-CoA[c0] + (2)H2O[c0]
	rxn05734_c0	aldehyde dehydrogenase (glyoxylate, NAD)_c0	H2O[c0] + Glyoxalate[c0] + NAD[c0] <=> (2)H+[c0] + Oxalate[c0] + NADH[c0]
	rxn01302_c0	L-Homoserine:NADP+ oxidoreductase_c0	NADP[c0] + L-Homoserine[c0] <=> H+[c0] + L-Aspartate4-semialdehyde[c0] + NADPH[c0]
	rxn05422_c0	10-methyl-3-oxo-undecanoyl-ACP:NADP+ oxidoreductase_c0	H+[c0] + 10-methyl-3-oxo-undecanoyl-ACP[c0] + NADPH[c0] <=> NADP[c0] + 10-methyl-3-hydroxy-undecanoyl-ACP[c0]
	rxn05448_c0	10-methyl-trans-undec-2-enoyl-ACP:NAD+ oxidoreductase (A-specific)_c0	H+[c0] + NADH[c0] + 10-methyl-trans-undec-2-enoyl-ACP[c0] => NAD[c0] + 10-methyl-undecanoyl-ACP[c0]
	rxn00048_c0	6,7-Dimethyl-8-(1-D-ribityl)lumazine:6,7-dimethyl-8-(1-D-ribityl)_c0	(2)6-7-Dimethyl-8--1-D-ribityllumazine[c0] => 4--1-D-Ribitylamino-5-aminouracil[c0] + Riboflavin[c0]
	rxn07584_c0	ATP:lipoate adenylyltransferase_c0	H+[c0] + ATP[c0] + Lipoate[c0] <=> Lipoyl-AMP[c0] + PPi[c0]
	rxn03164_c0	UDP-N-acetylmuramoyl-L-alanyl-D-glutamyl-meso-2,6-_c0	ATP[c0] + UDP-N-acetylmuramoyl-L-alanyl-D-gamma-glutamyl-meso-2-6-diaminopimelate[c0] + Ala-Ala[c0] => H+[c0] + Phosphate[c0] + ADP[c0] + UDP-N-acetylmuramoyl-L-alanyl-D-glutamyl-6-carboxy-L-lysyl-D-alanyl- D-alanine[c0]
	rxn05229_c0	NCAIR synthetase and NCAIR mutase_c0	ATP[c0] + AIR[c0] + H2CO3[c0] => 5'-Phosphoribosyl-4-carboxy-5-aminoimidazole[c0] + H+[c0] + Phosphate[c0] + ADP[c0]
	rxn12637_c0	aminopeptidase_c0	gly-asp-L[c0] + H2O[c0] <=> L-Aspartate[c0] + Glycine[c0]
	rxn09104_c0	phosphatidylglycerol phosphate phosphatase (n-C16:0)_c0	H2O[c0] + Phosphatidylglycerophosphate dihexadecanoyl[c0] => Phosphatidylglycerol dihexadecanoyl[c0] + H+[c0] + Phosphate[c0]
	rxn07586_c0	rxn07586_c0	H2O[c0] + Cobalt-precorrin 5[c0] <=> Cobalt-precorrin 5B[c0] + H+[c0] + Acetaldehyde[c0]
	rxn05415_c0	6-methyl-3-hydroxy-heptanoyl-ACP hydro-lyase_c0	6-methyl-3-hydroxy-heptanoyl-ACP[c0] <=> H2O[c0] + 6-methyl-trans-hept-2-enoyl-ACP[c0]
	rxn01416_c0	thiosulfate:cyanide sulfurtranserase_c0	H2S2O3[c0] + HCN[c0] <=> Sulfite[c0] + Thiocyanate[c0]
	rxn08807_c0	Lysophospholipase L1 (2-acylglycerophosphoethanolamine, n-C16:1) (periplasm)_c0	H2O[c0] + 1-Acyl-sn-glycero-3-phosphoethanolamine hexadec-9-enoyl[c0] <=> H+[c0] + hexadecenoate[c0] + Glycerophosphoethanolamine[c0]
	rxn05054_c0	adenosylcobyric acid:(R)-1-aminopropan-2-ol ligase (ADP-forming)_c0	ATP[c0] + Adenosylcobyric acid[c0] + 1-Aminopropan-2-ol[c0] <=> H+[c0] + Phosphate[c0] + Adenosyl cobinamide[c0] + ADP[c0]
	rxn08297_c0	diacylglycerol kinase (n-C16:0)_c0	ATP[c0] + 1,2-Diacyl-sn-glycerol dihexadecanoyl[c0] <=> 1,2-dihexadecanoyl-sn-glycerol 3-phosphate[c0] + ADP[c0]
	rxn00902_c0	3-Carboxy-3-hydroxy-4-methylpentanoate 3-methyl-2-oxobutanoate-lyase_c0	H+[c0] + 2-Isopropylmalate[c0] + CoA[c0] <= 3-Methyl-2-oxobutanoate[c0] + H2O[c0] + Acetyl-CoA[c0]
	rxn00952_c0	O-Acetyl-L-homoserine acetate-lyase (adding methanethiol)_c0	O-Acetyl-L-homoserine[c0] + H2S[c0] => H+[c0] + Homocysteine[c0] + Acetate[c0]
	rxn08809_c0	Lysophospholipase L1 (2-acylglycerophosphoethanolamine, n-C18:1) (periplasm)_c0	H2O[c0] + L-2-Lysophosphatidylethanolamine[c0] <=> octadecenoate[c0] + H+[c0] + Glycerophosphoethanolamine[c0]
	rxn00503_c0	L-1-Pyrroline-5-carboxylate:NAD+ oxidoreductase_c0	(2)H2O[c0] + NAD[c0] + 1-Pyrroline-5-carboxylate[c0] <=> H+[c0] + NADH[c0] + L-Glutamate[c0]
	rxn10266_c0	anteisoheptadecanoyl-Phosphatidylglycerophosphate phosphohydrolase_c0	Dianteisoheptadecanoylphosphatidylglycerophosphate[c0] + H2O[c0] => Dianteisoheptadecanoylphosphatidylglycerol[c0] + H+[c0] + Phosphate[c0]
	rxn03909_c0	1-Deoxy-D-xylulose-5-phosphate pyruvate-lyase (carboxylating)_c0	Glyceraldehyde3-phosphate[c0] + H+[c0] + Pyruvate[c0] => 1-deoxy-D-xylulose5-phosphate[c0] + CO2[c0]
	rxn05187_c0	Vitamin ABC transport_c0	ATP[c0] + H2O[c0] + Vitamin B12[e0] => H+[c0] + Phosphate[c0] + Vitamin B12[c0] + ADP[c0]
	rxn05328_c0	Hexadecanoyl-[acyl-carrier protein]:malonyl-CoA_c0	hexadecanoyl-acp[c0] + NAD[c0] <= H+[c0] + NADH[c0] + (2E)-Hexadecenoyl-[acp][c0]
	rxn02853_c0	Imidazole acetaldehyde:NAD+ oxidoreductase_c0	Imidazole acetaldehyde[c0] + H2O[c0] + NAD[c0] => (2)H+[c0] + NADH[c0] + 4-Imidazoleacetate[c0]
	rxn10230_c0	anteisopentadecanoyl-CDPdiacylglycerol-serine O-phosphatidyltransferase_c0	L-Serine[c0] + CDP-1,2-dianteisopentadecanoylglycerol[c0] => H+[c0] + Dianteisopentadecanoylphosphatidylserine[c0] + CMP[c0]
	rxn00999_c0	Phenylpyruvate:oxygen oxidoreductase (hydroxylating,decarboxylating)_c0	Phenylpyruvate[c0] + O2[c0] => 2-Hydroxyphenylacetate[c0] + CO2[c0]
	rxn02056_c0	S-Adenosyl-L-methionine:uroporphyrin-III C-methyltransferase_c0	(2)H+[c0] + Siroheme[c0] <=> Sirohydrochlorin[c0] + Fe2+[c0]
	rxn05372_c0	10-methyl-3-oxo-dodecanoyl-ACP:NADP+ oxidoreductase_c0	H+[c0] + 10-methyl-3-oxo-dodecanoyl-ACP[c0] + NADPH[c0] <=> 10-methyl-3-hydroxy-dodecanoyl-ACP[c0] + NADP[c0]
	rxn00459_c0	2-Phospho-D-glycerate hydro-lyase_c0	2-Phospho-D-glycerate[c0] <=> H2O[c0] + Phosphoenolpyruvate[c0]
	rxn00405_c0	L-Arginine carboxy-lyase_c0	H+[c0] + L-Arginine[c0] => CO2[c0] + Agmatine[c0]
	rxn02949_c0	(S)-3-Hydroxyisobutyryl-CoA hydro-lyase_c0	Methacrylyl-CoA[c0] + H2O[c0] <=> (S)-3-Hydroxyisobutyryl-CoA[c0]
	rxn10225_c0	isohexadecanoyl-phosphatidate cytidylyltransferase_c0	1,2-diisohexadecanoyl-sn-glycerol 3-phosphate[c0] + CTP[c0] <=> CDP-1,2-diisohexadecanoylglycerol[c0] + PPi[c0]
	rxn10259_c0	isoheptadecanoyl-CDPdiacylglycerol:sn-glycerol-3-phosphate 3-phosphatidyltransferase_c0	CDP-1,2-diisoheptadecanoylglycerol[c0] + Glycerol-3-phosphate[c0] <=> Diisoheptadecanoylphosphatidylglycerophosphate[c0] + CMP[c0]
	rxn01011_c0	D-Glycerate:NADP+ 2-oxidoreductase_c0	NAD[c0] + Glycerate[c0] <=> H+[c0] + Hydroxypyruvate[c0] + NADH[c0]
	rxn00929_c0	L-Proline:NAD+ 5-oxidoreductase_c0	L-Proline[c0] + NAD[c0] <=> H+[c0] + NADH[c0] + 1-Pyrroline-5-carboxylate[c0]
	rxn00312_c0	L-Lysine:oxygen 2-oxidoreductase (decarboxylating)_c0	L-Lysine[c0] + O2[c0] => H2O[c0] + CO2[c0] + 5-Aminopentanamide[c0]
	rxn08311_c0	CDP-diacylglycerol synthetase (n-C18:0)_c0	1,2-dioctadecanoyl-sn-glycerol 3-phosphate[c0] + CTP[c0] <=> CDP-1,2-dioctadecanoylglycerol[c0] + PPi[c0]
	rxn01492_c0	ATP:D-fructose-1-phosphate 6-phosphotransferase_c0	D-fructose-1-phosphate[c0] + ATP[c0] <=> ADP[c0] + D-fructose-1,6-bisphosphate[c0]
	rxn01101_c0	3-Phospho-D-glycerate:NAD+ 2-oxidoreductase_c0	NAD[c0] + 3-Phosphoglycerate[c0] <=> H+[c0] + NADH[c0] + 3-Phosphonooxypyruvate[c0]
	rxn08844_c0	Lysophospholipase L2 (2-acylglycerophosphoethanolamine, n-C18:1)_c0	H2O[c0] + 2-Acyl-sn-glycero-3-phosphoethanolamine octadec-11-enoyl[c0] <=> octadecenoate[c0] + H+[c0] + Glycerophosphoethanolamine[c0]
	rxn00302_c0	GTP 7,8-8,9-dihydrolase_c0	H2O[c0] + GTP[c0] => Formamidopyrimidine nucleoside triphosphate[c0]
	rxn05621_c0	methanesulfonate transport via ABC system_c0	ATP[c0] + H2O[c0] + methanesulfonate[e0] => H+[c0] + Phosphate[c0] + ADP[c0] + methanesulfonate[c0]
	rxn01277_c0	D-gluconate:NADP+ oxidoreductase_c0	NADP[c0] + GLCN[c0] <=> H+[c0] + 2-Dehydro-D-gluconate[c0] + NADPH[c0]
	rxn05145_c0	Orthophosphate-ABC transport_c0	ATP[c0] + H2O[c0] + Phosphate[e0] <=> H+[c0] + (2)Phosphate[c0] + ADP[c0]
	rxn05341_c0	(3R)-3-Hydroxyoctanoyl-[acyl-carrier-protein]:NADP+ oxidoreductase_c0	(R)-3-Hydroxyoctanoyl-[acyl-carrier protein][c0] + NADP[c0] <=> H+[c0] + 3-oxooctanoyl-acp[c0] + NADPH[c0]
	rxn02944_c0	N2-succinyl-L-ornithine:2-oxoglutarate 5-aminotransferase_c0	2-Oxoglutarate[c0] + N2-Succinyl-L-ornithine[c0] <=> L-Glutamate[c0] + N-Succinyl-L-glutamate 5-semialdehyde[c0]
	rxn02331_c0	2-Dehydro-3-deoxy-D-octonate-8-phosphate_c0	H+[c0] + Phosphate[c0] + 3-Deoxy-D-manno-octulosonate8-phosphate[c0] <= H2O[c0] + Phosphoenolpyruvate[c0] + D-Arabinose5-phosphate[c0]
	rxn11545_c0	Precorrin 3A + Oxygen <=> Precorrin 3B_c0	Precorrin 3A[c0] + (0.5)O2[c0] <=> Precorrin 3B[c0]
	rxn02988_c0	quinolinate synthase_c0	Quinolinate[c0] + H+[c0] + (2)H2O[c0] + Phosphate[c0] <= Iminoaspartate[c0] + Glycerone-phosphate[c0]
	rxn05460_c0	3-Oxooctodecanoyl-ACP:malonyl-[acyl-carrier-protein] C-acyltransferase (decarboxylating)_c0	H+[c0] + hexadecanoyl-acp[c0] + Malonyl-acyl-carrierprotein-[c0] => ACP[c0] + CO2[c0] + 3-Oxooctodecanoyl-ACP[c0]
	rxn04139_c0	2-Octaprenyl-3-methyl-6-methoxy-1,4-benzoquinone ,NADPH2:oxygen_c0	2-Octaprenyl-3-methyl-6-methoxy-1,4-benzoquinone[c0] + O2[c0] + NADPH[c0] => NADP[c0] + H2O[c0] + 2-Octaprenyl-3-methyl-5-hydroxy-6-methoxy-1,4-benzoquinone[c0]
	rxn00290_c0	Succinyl-CoA:3-oxo-acid CoA-transferase_c0	Succinyl-CoA[c0] + Acetoacetate[c0] <=> Succinate[c0] + Acetoacetyl-CoA[c0]
	rxn10199_c0	Peptidoglycan subunit synthesis_c0	Peptidoglycan polymer (n-1 subunits)[c0] + Undecaprenyl-diphospho-N-acetylmuramoyl--N-acetylglucosamine-L-ala-D-glu-meso-2-6-diaminopimeloyl-D-ala-D-ala[c0] <=> Bactoprenyl diphosphate[c0] + Peptidoglycan polymer (n subunits)[c0]
	rxn03241_c0	(S)-3-Hydroxytetradecanoyl-CoA hydro-lyase_c0	(S)-3-Hydroxytetradecanoyl-CoA[c0] <=> H2O[c0] + (2E)-Tetradecenoyl-CoA[c0]
	rxn09200_c0	Phosphatidylserine decarboxylase (n-C16:0)_c0	(2)H+[c0] + phosphatidylserine dihexadecanoyl[c0] <=> phosphatidylethanolamine dihexadecanoyl[c0] + CO2[c0]
	rxn01573_c0	L-Isoleucine:NAD+ oxidoreductase(deaminating)_c0	H2O[c0] + NAD[c0] + L-Isoleucine[c0] <=> 3MOP[c0] + H+[c0] + NH3[c0] + NADH[c0]
	rxn02937_c0	2-(Formamido)-N1-(5-phosphoribosyl)acetamidine cyclo-ligase_c0	ATP[c0] + 5'-Phosphoribosylformylglycinamidine[c0] <=> H+[c0] + Phosphate[c0] + ADP[c0] + AIR[c0]
	rxn00783_c0	2-Dehydro-3-deoxy-D-galactonate-6-phosphate_c0	2-Dehydro-3-deoxy-D-galactonate 6-phosphate[c0] <=> Glyceraldehyde3-phosphate[c0] + Pyruvate[c0]
	rxn00649_c0	O3-Acetyl-L-serine acetate-lyase (adding hydrogen sulfide)_c0	H2S[c0] + O-Acetyl-L-serine[c0] => H+[c0] + L-Cysteine[c0] + Acetate[c0]
	rxn10806_c0	cytochrome oxidase bd (menaquinol-8: 2 protons)_c0	(2)H+[c0] + (0.5)O2[c0] + Menaquinol 8[c0] => (2)H+[e0] + H2O[c0] + Menaquinone 8[c0]
	rxn12851_c0	Gly-Try ABC transporters_c0	ATP[c0] + H2O[c0] + Gly-Tyr[e0] => Phosphate[c0] + ADP[c0] + Gly-Tyr[c0]
	rxn05153_c0	Sulfate-ABC transport_c0	ATP[c0] + Sulfate[e0] + H2O[c0] => H+[c0] + Sulfate[c0] + Phosphate[c0] + ADP[c0]
	rxn01446_c0	Deoxyguanosine:orthophosphate ribosyltransferase_c0	H+[c0] + Phosphate[c0] + Deoxyguanosine[c0] <=> Guanine[c0] + deoxyribose-1-phosphate[c0]
	rxn05346_c0	butyryl-[acyl-carrier protein]:malonyl-[acyl-carrier-protein]_c0	Butyryl-ACP[c0] + H+[c0] + Malonyl-acyl-carrierprotein-[c0] => ACP[c0] + CO2[c0] + 3-Oxohexanoyl-[acp][c0]
	rxn00671_c0	2-Methyl-3-oxopropanoate:NAD+ oxidoreductase (CoA-propanoylating)_c0	3-Oxo-2-methylpropanoate[c0] + NAD[c0] + CoA[c0] <=> Propionyl-CoA[c0] + CO2[c0] + NADH[c0]
	rxn10340_c0	isopentadecanoyl-cardiolipin synthase_c0	(2)Diisopentadecanoylphosphatidylglycerol[c0] <=> Isopentadecanoylcardiolipin (B. subtilis)[c0] + Glycerol[c0]
	rxn00375_c0	N-Formyl-L-glutamate amidohydrolase_c0	H2O[c0] + N-Formyl-L-glutamate[c0] <=> L-Glutamate[c0] + Formate[c0]
	rxn00512_c0	Glycolate:NAD+ oxidoreductase_c0	NAD[c0] + Glycolate[c0] <=> H+[c0] + Glyoxalate[c0] + NADH[c0]
	rxn05335_c0	(3R)-3-Hydroxypalmitoyl-[acyl-carrier-protein] hydro-lyase_c0	HMA[c0] <=> (2E)-Tetradecenoyl-[acp][c0] + H2O[c0]
	rxn10122_c0	NADH dehydrogenase (ubiquinone-8 & 3.5 protons)_c0	(4.5)H+[c0] + Ubiquinone-8[c0] + NADH[c0] <=> (3.5)H+[e0] + Ubiquinol-8[c0] + NAD[c0]
	rxn00324_c0	Glycolate:NADP+ oxidoreductase_c0	NADP[c0] + Glycolate[c0] <=> H+[c0] + Glyoxalate[c0] + NADPH[c0]
	rxn00187_c0	L-Glutamate:ammonia ligase (ADP-forming)_c0	ATP[c0] + NH3[c0] + L-Glutamate[c0] => H+[c0] + Phosphate[c0] + L-Glutamine[c0] + ADP[c0]
	rxn05305_c0	LYSt3r_c0	H+[e0] + L-Lysine[c0] <=> H+[c0] + L-Lysine[e0]
	rxn00737_c0	L-threonine ammonia-lyase_c0	L-Threonine[c0] => NH3[c0] + 2-Oxobutyrate[c0]
	rxn01200_c0	Sedoheptulose-7-phosphate:D-glyceraldehyde-3-phosphate_c0	Sedoheptulose7-phosphate[c0] + Glyceraldehyde3-phosphate[c0] <=> D-Xylulose5-phosphate[c0] + ribose-5-phosphate[c0]
	rxn03841_c0	4-amino-4-deoxychorismate pyruvate-lyase_c0	ADC[c0] => H+[c0] + Pyruvate[c0] + ABEE[c0]
	rxn00193_c0	L-Glutamate racemase_c0	L-Glutamate[c0] <=> D-Glutamate[c0]
	rxn01834_c0	(R)-S-Lactoylglutathione methylglyoxal-lyase (isomerizing)_c0	(R)-S-Lactoylglutathione[c0] <=> GSH[c0] + 2-Oxopropanal[c0]
	rxn00327_c0	Ureidoglycolate amidohydrolase (decarboxylating)_c0	(2)H+[c0] + H2O[c0] + Ureidoglycolate[c0] => (2)NH3[c0] + Glyoxalate[c0] + CO2[c0]
	rxn01634_c0	5-Dehydro-4-deoxy-D-glucarate hydro-lyase (decarboxylating)_c0	H+[c0] + 5-Dehydro-4-deoxy-D-glucarate[c0] => 2,5-Dioxopentanoate[c0] + H2O[c0] + CO2[c0]
	rxn01073_c0	sn-Glycero-3-phosphoethanolamine glycerophosphohydrolase_c0	H2O[c0] + Glycerophosphoethanolamine[c0] => Aminoethanol[c0] + Glycerol-3-phosphate[c0]
	rxn05175_c0	Spermidine-ABC transport_c0	ATP[c0] + H2O[c0] + Spermidine[e0] => H+[c0] + Phosphate[c0] + Spermidine[c0] + ADP[c0]
	rxn08294_c0	diacylglycerol kinase (n-C12:0)_c0	ATP[c0] + 1,2-Diacyl-sn-glycerol didodecanoyl[c0] <=> 1,2-didodecanoyl-sn-glycerol 3-phosphate[c0] + ADP[c0]
	rxn05381_c0	14-methyl-3-hydroxy-hexa-decanoyl-ACP hydro-lyase_c0	14-methyl-3-hydroxy-hexa-decanoyl-ACP[c0] <=> 14-methyl-trans-hexa-dec-2-enoyl-ACP[c0] + H2O[c0]
	rxn00604_c0	D-Glucose-6-phosphate:NADP+ 1-oxoreductase_c0	NADP[c0] + D-glucose-6-phosphate[c0] <=> H+[c0] + 6-phospho-D-glucono-1-5-lactone[c0] + NADPH[c0]
	rxn05386_c0	5-methyl-3-hydroxy-hexanoyl-ACP hydro-lyase_c0	5-methyl-3-hydroxy-hexanoyl-ACP[c0] <=> H2O[c0] + 5-methyl-trans-hex-2-enoyl-ACP[c0]
	rxn12844_c0	Gly-Cys aminopeptidase_c0	Gly-Cys[c0] + H2O[c0] <=> L-Cysteine[c0] + Glycine[c0]
	rxn01678_c0	ATP:nucleoside-diphosphate phosphatransferase_c0	ATP[c0] + dUDP[c0] <=> dUTP[c0] + ADP[c0]
	rxn08814_c0	Lysophospholipase L1 (2-acylglycerophosphoglycerol, n-C16:1) (periplasm)_c0	1-Acyl-sn-glycero-3-phosphoglycerol hexadec-9-enoyl[c0] + H2O[c0] <=> H+[c0] + hexadecenoate[c0] + Glycerophosphoglycerol[c0]
	rxn01332_c0	Phosphoenolpyruvate:D-erythrose-4-phosphate_c0	D-Erythrose4-phosphate[c0] + H2O[c0] + Phosphoenolpyruvate[c0] => DAHP[c0] + H+[c0] + Phosphate[c0]
	rxn01858_c0	Deoxyadenosine aminohydrolase_c0	Deoxyadenosine[c0] + H+[c0] + H2O[c0] => NH3[c0] + Deoxyinosine[c0]
	rxn08657_c0	Glycolate oxidase_c0	2-Demethylmenaquinone 8[c0] + Glycolate[c0] => Glyoxalate[c0] + 2-Demethylmenaquinol 8[c0]
	rxn08816_c0	Lysophospholipase L1 (2-acylglycerophosphoglycerol, n-C18:1) (periplasm)_c0	1-Acyl-sn-glycero-3-phosphoglycerol octadec-11-enoyl[c0] + H2O[c0] <=> octadecenoate[c0] + H+[c0] + Glycerophosphoglycerol[c0]
	rxn09103_c0	phosphatidylglycerol phosphate phosphatase (n-C14:1)_c0	Phosphatidylglycerophosphate ditetradec-7-enoyl[c0] + H2O[c0] => H+[c0] + Phosphate[c0] + Phosphatidylglycerol ditetradec-7-enoyl[c0]
	rxn09208_c0	Phosphatidylserine syntase (n-C16:0)_c0	L-Serine[c0] + CDP-1,2-dihexadecanoylglycerol[c0] => H+[c0] + phosphatidylserine dihexadecanoyl[c0] + CMP[c0]
	rxn05567_c0	Galactitol transport via PEP:Pyr PTS_c0	Dulcose[e0] + Phosphoenolpyruvate[c0] <=> Pyruvate[c0] + Galactitol 1-phosphate[c0]
	rxn01807_c0	ATP:pyridoxal 5'-phosphotransferase_c0	ATP[c0] + PM[c0] <=> Pyridoxamine phosphate[c0] + ADP[c0]
	rxn10060_c0	NAD kinase (dTTP)_c0	TTP[c0] + NAD[c0] <=> NADP[c0] + dTDP[c0]
	rxn06377_c0	glycine:lipoylprotein oxidoreductase (decarboxylating and_c0	H+[c0] + Lipoylprotein[c0] + Glycine[c0] => CO2[c0] + S-Aminomethyldihydrolipoylprotein[c0]
	rxn00206_c0	Superoxide:superoxide oxidoreductase_c0	(2)O2-[c0] => H2O2[c0] + O2[c0]
	rxn02933_c0	(2S,3S)-3-hydroxy-2-methylbutanoyl-CoA:NAD+ oxidoreductase_c0	2-methyl-3-hydroxy-butyryl-CoA[c0] + NAD[c0] <=> H+[c0] + 2-Methylacetoacetyl-CoA[c0] + NADH[c0]
	rxn00100_c0	ATP:dephospho-CoA 3'-phosphotransferase_c0	Dephospho-CoA[c0] + ATP[c0] => CoA[c0] + ADP[c0]
	rxn01018_c0	Carbamoyl-phosphate:L-aspartate carbamoyltransferase_c0	L-Aspartate[c0] + Carbamoylphosphate[c0] => (2)H+[c0] + Phosphate[c0] + N-Carbamoyl-L-aspartate[c0]
	rxn05656_c0	sulfoacetate transport via ABC system_c0	ATP[c0] + Sulfoacetate[e0] + H2O[c0] => H+[c0] + Sulfoacetate[c0] + Phosphate[c0] + ADP[c0]
	rxn00806_c0	L-Leucine:2-oxoglutarate aminotransferase_c0	2-Oxoglutarate[c0] + L-Leucine[c0] <=> 4MOP[c0] + L-Glutamate[c0]
	rxn02834_c0	Phosphoribosyl-ATP pyrophosphohydrolase_c0	H2O[c0] + Phosphoribosyl-ATP[c0] => Phosphoribosyl-AMP[c0] + PPi[c0]
	rxn00656_c0	L-Alanine:3-oxopropanoate aminotransferase_c0	3-Oxopropanoate[c0] + L-Alanine[c0] <=> beta-Alanine[c0] + Pyruvate[c0]
	rxn05334_c0	(3R)-3-Hydroxybutanoyl-[acyl-carrier-protein] hydro-lyase_c0	(R)-3-Hydroxyoctanoyl-[acyl-carrier protein][c0] <=> (2E)-Octenoyl-[acp][c0] + H2O[c0]
	rxn02341_c0	N-[(R)-4'-Phosphopantothenoyl]-L-cysteine carboxy-lyase_c0	H+[c0] + (R)-4'-Phosphopantothenoyl-L-cysteine[c0] => CO2[c0] + Phosphopantetheine[c0]
	rxn06022_c0	[Acyl-carrier-protein] 4'-pantetheine-phosphohydrolase_c0	ACP[c0] + H2O[c0] => apo-ACP[c0] + Phosphopantetheine[c0]
	rxn09310_c0	thiazole phosphate synthesis_c0	ATP[c0] + 1-deoxy-D-xylulose5-phosphate[c0] + L-Tyrosine[c0] + L-Cysteine[c0] => 4-Hydroxy-benzylalcohol[c0] + AMP[c0] + 4-Methyl-5--2-phosphoethyl-thiazole[c0] + L-Alanine[c0] + H2O[c0] + CO2[c0] + PPi[c0]
	rxn03175_c0	N-(5'-Phospho-D-ribosylformimino)-5-amino-1-_c0	phosphoribosylformiminoaicar-phosphate[c0] <=> phosphoribulosylformimino-AICAR-phosphate[c0]
	rxn10945_c0	EX_pro_L_e_c0	L-Proline[e0] <=> L-Proline[c0]
	rxn05649_c0	D-serine transport in/out via proton symport_c0	H+[e0] + D-Serine[e0] <=> H+[c0] + D-Serine[c0]
	rxn10219_c0	isohexadecanoyl-1-acylglycerol-3-phosphate O-acyltransferase_c0	1-isohexadecanoyl-sn-glycerol 3-phosphate[c0] + fa6coa[c0] => 1,2-diisohexadecanoyl-sn-glycerol 3-phosphate[c0] + CoA[c0]
	rxn00786_c0	D-Fructose-1,6-bisphosphate D-glyceraldehyde-3-phosphate-lyase_c0	D-fructose-1,6-bisphosphate[c0] <=> Glyceraldehyde3-phosphate[c0] + Glycerone-phosphate[c0]
	rxn01637_c0	N2-Acetyl-L-ornithine:2-oxoglutarate aminotransferase_c0	2-Oxoglutarate[c0] + N-Acetylornithine[c0] <=> 2-Acetamido-5-oxopentanoate[c0] + L-Glutamate[c0]
	rxn05158_c0	sn-Glycerol ABC transport_c0	ATP[c0] + Glycerol-3-phosphate[e0] + H2O[c0] => H+[c0] + Glycerol-3-phosphate[c0] + Phosphate[c0] + ADP[c0]
	rxn00379_c0	ATP:sulfate adenylyltransferase_c0	H+[c0] + ATP[c0] + Sulfate[c0] <=> APS[c0] + PPi[c0]
	rxn08803_c0	Lysophospholipase L1 (2-acylglycerophosphoethanolamine, n-C12:0) (periplasm)_c0	1-Acyl-sn-glycero-3-phosphoethanolamine dodecanoyl[c0] + H2O[c0] <=> H+[c0] + ddca[c0] + Glycerophosphoethanolamine[c0]
	rxn05164_c0	L-Histidine-ABC transport_c0	ATP[c0] + H2O[c0] + L-Histidine[e0] => H+[c0] + Phosphate[c0] + L-Histidine[c0] + ADP[c0]
	rxn12640_c0	aminopeptidase_c0	H2O[c0] + ala-L-glu-L[c0] <=> L-Glutamate[c0] + L-Alanine[c0]
	rxn10206_c0	anteisoheptadecanoyl-glycerol-3-phosphate O-acyltransferase_c0	fa12coa[c0] + Glycerol-3-phosphate[c0] => 1-anteisoheptadecanoyl-sn-glycerol 3-phosphate[c0] + CoA[c0]
	rxn05376_c0	12-methyl-3-oxo-tetra-decanoyl-ACP:NADP+ oxidoreductase_c0	H+[c0] + 12-methyl-3-oxo-tetra-decanoyl-ACP[c0] + NADPH[c0] <=> 12-methyl-3-hydroxy-tetra-decanoyl-ACP[c0] + NADP[c0]
	rxn05342_c0	(3R)-3-Hydroxytetradecanoyl-[acyl-carrier-protein]:NADP+_c0	HMA[c0] + NADP[c0] <=> H+[c0] + 3-oxotetradecanoyl-acp[c0] + NADPH[c0]
	rxn06510_c0	Lauroyl-CoA:acetyl-CoA C-acyltransferase_c0	Lauroyl-CoA[c0] + Acetyl-CoA[c0] <=> CoA[c0] + 3-Oxotetradecanoyl-CoA[c0]
	rxn05596_c0	potassium transport out via proton antiport_c0	H+[e0] + K+[c0] <=> H+[c0] + K+[e0]
	rxn02866_c0	3-Methylbutanoyl-CoA:(acceptor) 2,3-oxidoreductase_c0	Isovaleryl-CoA[c0] + FAD[c0] <= Dimethylacryloyl-CoA[c0] + FADH2[c0]
	rxn05733_c0	cysteine synthase (Thiosulfate)_c0	H2S2O3[c0] + trdrd[c0] + O-Acetyl-L-serine[c0] => trdox[c0] + L-Cysteine[c0] + Sulfite[c0] + Acetate[c0]
	rxn05350_c0	hexanoyl-[acyl-carrier protein]:malonyl-[acyl-carrier-protein]_c0	H+[c0] + Hexanoyl-ACP[c0] + Malonyl-acyl-carrierprotein-[c0] => ACP[c0] + CO2[c0] + 3-oxooctanoyl-acp[c0]
	rxn00720_c0	5,6-Dihydrouracil:NADP+ oxidoreductase_c0	NADP[c0] + Hydrouracil[c0] <=> Uracil[c0] + H+[c0] + NADPH[c0]
	rxn07430_c0	rxn07430_c0	H+[c0] + 3-Methyl-2-oxobutanoate[c0] + TPP[c0] => 2-Methyl-1-hydroxypropyl-TPP[c0] + CO2[c0]
	rxn00262_c0	L-Aspartic acid:oxygen oxidoreductase (deaminating)_c0	L-Aspartate[c0] + H2O[c0] + O2[c0] => Oxaloacetate[c0] + NH3[c0] + H2O2[c0]
	rxn02404_c0	3-Deoxy-D-manno-octulosonate-8-phosphate 8-phosphohydrolase_c0	H2O[c0] + 3-Deoxy-D-manno-octulosonate8-phosphate[c0] => H+[c0] + Phosphate[c0] + KDO[c0]
	rxn10255_c0	isotetradecanoyl-Diacylglycerol kinase_c0	ATP[c0] + 1,2-Diisotetradecanoyl-sn-glycerol[c0] <=> 1,2-diisotetradecanoyl-sn-glycerol 3-phosphate[c0] + ADP[c0]
	rxn00704_c0	alpha-D-Glucose 1-phosphate 1,6-phosphomutase_c0	Glucose-1-phosphate[c0] <=> D-glucose-6-phosphate[c0]
	rxn00183_c0	L-Glutamate 5-semialdehyde:NAD+ oxidoreductase_c0	L-Glutamate5-semialdehyde[c0] + H2O[c0] + NAD[c0] => (2)H+[c0] + NADH[c0] + L-Glutamate[c0]
	rxn04750_c0	(S)-3-hydroxyacyl-CoA:NAD+ oxidoreductase_c0	NAD[c0] + (3S)-3-Hydroxyadipyl-CoA[c0] <=> H+[c0] + NADH[c0] + 3-Oxoadipyl-CoA[c0]
	rxn00710_c0	Orotidine-5'-phosphate carboxy-lyase_c0	H+[c0] + Orotidylic acid[c0] => UMP[c0] + CO2[c0]
	rxn05539_c0	Dipeptide transport via ABC system (cgly)_c0	ATP[c0] + H2O[c0] + Cys-Gly[e0] => H+[c0] + Phosphate[c0] + ADP[c0] + Cys-Gly[c0]
	rxn05437_c0	12-methyl-trans-tetra-dec-2-enoyl-ACP:NAD+ oxidoreductase (A-specific)_c0	H+[c0] + NADH[c0] + 12-methyl-trans-tetra-dec-2-enoyl-ACP[c0] => 12-methyl-tetra-decanoyl-ACP[c0] + NAD[c0]
	rxn02775_c0	S-Adenosyl-L-methionine:precorrin-4 C20-methyltransferase_c0	H+[c0] + Precorrin 2[c0] + S-Adenosyl-L-methionine[c0] <=> S-Adenosyl-homocysteine[c0] + Precorrin 3A[c0]
	rxn07589_c0	rxn07589_c0	Cobalt-precorrin 7[c0] + S-Adenosyl-L-methionine[c0] <=> S-Adenosyl-homocysteine[c0] + CO2[c0] + Cobalt-precorrin 8[c0]
	rxn00717_c0	Cytosine aminohydrolase_c0	Cytosine[c0] + H+[c0] + H2O[c0] => Uracil[c0] + NH3[c0]
	rxn01642_c0	4-imidazolone-5-propanoate amidohydrolase_c0	H2O[c0] + 4-Imidazolone-5-propanoate[c0] => N-Formimino-L-glutamate[c0]
	rxn08840_c0	Lysophospholipase L2 (2-acylglycerophosphoethanolamine, n-C14:1)_c0	H2O[c0] + 2-Acyl-sn-glycero-3-phosphoethanolamine tetradec-7-enoyl[c0] => H+[c0] + Glycerophosphoethanolamine[c0] + tetradecenoate[c0]
	rxn05249_c0	FACOAL150(ISO)_c0	H+[c0] + ATP[c0] + CoA[c0] + fa3[c0] => AMP[c0] + PPi[c0] + fa3coa[c0]
	rxn02897_c0	Nicotinate-nucleotide:dimethylbenzimidazole_c0	Dimethylbenzimidazole[c0] + Nicotinate ribonucleotide[c0] <=> H+[c0] + Niacin[c0] + alpha-Ribazole 5'-phosphate[c0]
	rxn01649_c0	Xanthosine:orthophosphate ribosyltransferase_c0	H+[c0] + Xanthosine[c0] + Phosphate[c0] <=> Ribose 1-phosphate[c0] + XAN[c0]
	rxn09107_c0	phosphatidylglycerol phosphate phosphatase (n-C18:1)_c0	Phosphatidylglycerophosphate dioctadec-11-enoyl[c0] + H2O[c0] => H+[c0] + Phosphatidylglycerol dioctadec-11-enoyl[c0] + Phosphate[c0]
	rxn03409_c0	Undecaprenyl-diphospho-N-acetylmuramoyl-(N-acetylglucosamine)-_c0	ATP[c0] + NH3[c0] + Undecaprenyl-diphospho-N-acetylmuramoyl--N-acetylglucosamine-L-ala-D-glu-meso-2-6-diaminopimeloyl-D-ala-D-ala[c0] => H+[c0] + Phosphate[c0] + Undecaprenyl-diphospho-N-acetylmuramoyl-(N-acetylglucosamine)-L-alanyl-D-glutaminyl-meso-2,6-diaminopimeloyl-D-alanyl-D-alanine[c0] + ADP[c0]
	rxn00330_c0	L-Malate glyoxylate-lyase (CoA-acetylating)_c0	L-Malate[c0] + H+[c0] + CoA[c0] <= H2O[c0] + Glyoxalate[c0] + Acetyl-CoA[c0]
	rxn03916_c0	D-glycero-D-manno-hepose 1-phosphate adenyltransferase_c0	ATP[c0] + D-Glycero-D-manno-heptose1-phosphate[c0] <=> ADP-D-glycero-D-manno-heptose[c0] + PPi[c0]
	rxn01301_c0	L-Homoserine:NAD+ oxidoreductase_c0	NAD[c0] + L-Homoserine[c0] <=> H+[c0] + L-Aspartate4-semialdehyde[c0] + NADH[c0]
	rxn05396_c0	9-methyl-decanoyl-ACP:malonyl-[acyl-carrier-protein] C-acyltransferase (decarboxylating)_c0	9-methyl-decanoyl-ACP[c0] + H+[c0] + Malonyl-acyl-carrierprotein-[c0] => ACP[c0] + CO2[c0] + 11-methyl-3-oxo-dodecanoyl-ACP[c0]
	rxn04046_c0	S-adenosyl-L-methionine:cobalt-factor-II C20-methyltransferase_c0	S-Adenosyl-L-methionine[c0] + Cobalt-precorrin 2[c0] <=> H+[c0] + Cobalt-precorrin 3[c0] + S-Adenosyl-homocysteine[c0]
	rxn13782_c0	Protein biosynthesis_c0	=> Protein biosynthesis[c0]
	rxn10334_c0	palmitoyl-cardiolipin synthase_c0	(2)Phosphatidylglycerol dihexadecanoyl[c0] <=> Palmitoylcardiolipin (B. subtilis)[c0] + Glycerol[c0]
	rxn00910_c0	5-methyltetrahydrofolate:NADP+ oxidoreductase_c0	NADP[c0] + 5-Methyltetrahydrofolate[c0] <=> H+[c0] + 5-10-Methylenetetrahydrofolate[c0] + NADPH[c0]
	rxn03407_c0	Undecaprenyl-diphospho-N-acetylmuramoyl-(N-acetylglucosamine)-_c0	ATP[c0] + NH3[c0] + Undecaprenyl-diphospho-N-acetylmuramoyl-(N-acetylglucosamine)-L-alanyl-gamma-D-glutamyl-L-lysyl-D-alanyl-D-alanine[c0] => H+[c0] + Phosphate[c0] + Undecaprenyl-diphospho-N-acetylmuramoyl-(N-acetylglucosamine)-L-alanyl-D-isoglutaminyl-L-lysyl-D-alanyl-D-alanine[c0] + ADP[c0]
	rxn02286_c0	UDP-N-acetylmuramate:L-alanine ligase (ADP-forming)_c0	UDP-MurNAc[c0] + ATP[c0] + L-Alanine[c0] => UDP-N-acetylmuramoyl-L-alanine[c0] + H+[c0] + Phosphate[c0] + ADP[c0]
	rxn03159_c0	UDP-2,3-bis(3-hydroxytetradecanoyl)-beta-D-glucosamine:2,3-bis-(3-_c0	Lipid X[c0] + UDP-2,3-bis(3-hydroxytetradecanoyl)glucosamine[c0] <=> UDP[c0] + Lipid A disaccharide[c0]
	rxn05363_c0	4-methyl-hexanoyl-ACP:malonyl-[acyl-carrier-protein] C-acyltransferase (decarboxylating)_c0	H+[c0] + Malonyl-acyl-carrierprotein-[c0] + 4-methyl-hexanoyl-ACP[c0] => ACP[c0] + CO2[c0] + 6-methyl-3-oxo-octanoyl-ACP[c0]
	rxn01682_c0	(1S,2R)-1-C-(indol-3-yl)glycerol 3-phosphate_c0	Indoleglycerol phosphate[c0] <=> Glyceraldehyde3-phosphate[c0] + indol[c0]
	rxn02474_c0	5-amino-6-(5-phosphoribitylamino)uracil:NADP+ 1'-oxidoreductase_c0	5-Amino-6--5-phosphoribitylaminouracil[c0] + NADP[c0] <=> H+[c0] + 5-Amino-6--5-phosphoribosylaminouracil[c0] + NADPH[c0]
	rxn05324_c0	Dodecanoyl-[acyl-carrier protein]:malonyl-CoA_c0	Dodecanoyl-ACP[c0] + NAD[c0] <= H+[c0] + (2E)-Dodecenoyl-[acp][c0] + NADH[c0]
	rxn01486_c0	trans,trans-Farnesyl-diphosphate:isopentenyl-diphosphate_c0	Isopentenyldiphosphate[c0] + Farnesyldiphosphate[c0] => Geranylgeranyl diphosphate[c0] + PPi[c0]
	rxn05464_c0	trans-Octodec-2-enoyl-ACP:NAD+ oxidoreductase (A-specific)_c0	H+[c0] + NADH[c0] + trans-Octodec-2-enoyl-ACP[c0] => Octodecanoyl-ACP[c0] + NAD[c0]
	rxn08822_c0	Lysophospholipase L2 (2-acylglycerophosphotidate, n-C18:0)_c0	2-octadecanoyl-sn-glycerol 3-phosphate[c0] + H2O[c0] <=> ocdca[c0] + H+[c0] + Glycerol-3-phosphate[c0]
	rxn05359_c0	4-methyl-3-oxo-hexanoyl-ACP:malonyl-[acyl-carrier-protein] C-acyltransferase (decarboxylating)_c0	H+[c0] + 2-methylbutyryl-ACP[c0] + Malonyl-acyl-carrierprotein-[c0] => 4-methyl-3-oxo-hexanoyl-ACP[c0] + ACP[c0] + CO2[c0]
	rxn00898_c0	2,3-Dihydroxy-3-methylbutanoate hydro-lyase_c0	2,3-Dihydroxy-isovalerate[c0] => 3-Methyl-2-oxobutanoate[c0] + H2O[c0]
	rxn10203_c0	myristoyl-glycerol-3-phosphate O-acyltransferase_c0	Myristoyl-CoA[c0] + Glycerol-3-phosphate[c0] => 1-tetradecanoyl-sn-glycerol 3-phosphate[c0] + CoA[c0]
	rxn01069_c0	O-Phospho-L-homoserine phospho-lyase (adding water)_c0	H2O[c0] + O-Phospho-L-homoserine[c0] => L-Threonine[c0] + H+[c0] + Phosphate[c0]
	rxn05322_c0	Butyryl-[acyl-carrier protein]:malonyl-CoA_c0	Butyryl-ACP[c0] + NAD[c0] <= H+[c0] + NADH[c0] + But-2-enoyl-[acyl-carrier protein][c0]
	rxn00117_c0	ATP:nucleoside-diphosphate phosphatransferase_c0	ATP[c0] + UDP[c0] <=> UTP[c0] + ADP[c0]
	rxn07435_c0	rxn07435_c0	Lipoamide[c0] + 2-Methyl-1-hydroxybutyl-TPP[c0] <=> S-(2-Methylbutanoyl)-dihydrolipoamide-E[c0] + TPP[c0]
	rxn01396_c0	ATP:pyridoxal 5'-phosphotransferase_c0	ATP[c0] + Pyridoxol[c0] <=> ADP[c0] + Pyridoxine phosphate[c0]
	rxn01997_c0	dTDPglucose 4,6-hydro-lyase_c0	dTDPglucose[c0] => dTDP-4-oxo-6-deoxy-D-glucose[c0] + H2O[c0]
	rxn05458_c0	hexadecanoyl-ACP:[acyl-carrier-protein] transferase_c0	hexadecanoyl-acp[c0] + CoA[c0] <=> Palmitoyl-CoA[c0] + ACP[c0]
	rxn05453_c0	13-methyl-tetra-decanoyl-ACP:[acyl-carrier-protein] transferase_c0	13-methyl-tetra-decanoyl-ACP[c0] + CoA[c0] <=> ACP[c0] + fa3coa[c0]
	rxn00555_c0	L-Glutamine:D-fructose-6-phosphate aminotransferase (hexose_c0	D-fructose-6-phosphate[c0] + L-Glutamine[c0] <=> L-Glutamate[c0] + D-Glucosamine phosphate[c0]
	rxn05541_c0	Dipeptide transport via ABC system (ala-glu)_c0	ATP[c0] + H2O[c0] + ala-L-glu-L[e0] => H+[c0] + Phosphate[c0] + ADP[c0] + ala-L-glu-L[c0]
	rxn08298_c0	diacylglycerol kinase (n-C16:1)_c0	ATP[c0] + 1,2-Diacyl-sn-glycerol dihexadec-9-enoyl[c0] <=> ADP[c0] + 1,2-dihexadec-9-enoyl-sn-glycerol 3-phosphate[c0]
	rxn00260_c0	L-Aspartate:2-oxoglutarate aminotransferase_c0	L-Aspartate[c0] + 2-Oxoglutarate[c0] <=> Oxaloacetate[c0] + L-Glutamate[c0]
	rxn05219_c0	L-Methionine ABC transport_c0	L-Methionine[e0] + ATP[c0] + H2O[c0] => H+[c0] + L-Methionine[c0] + Phosphate[c0] + ADP[c0]
	rxn05337_c0	(3R)-3-Hydroxyhexanoyl-[acyl-carrier-protein]:NADP+ oxidoreductase_c0	NADP[c0] + D-3-Hydroxyhexanoyl-[acp][c0] <=> H+[c0] + 3-Oxohexanoyl-[acp][c0] + NADPH[c0]
	rxn03137_c0	10-Formyltetrahydrofolate:5'-phosphoribosyl-5-amino-4-_c0	10-Formyltetrahydrofolate[c0] + AICAR[c0] <=> Tetrahydrofolate[c0] + FAICAR[c0]
	rxn05367_c0	6-methyl-octanoyl-ACP:malonyl-[acyl-carrier-protein] C-acyltransferase (decarboxylating)_c0	H+[c0] + 6-methyl-octanoyl-ACP[c0] + Malonyl-acyl-carrierprotein-[c0] => ACP[c0] + CO2[c0] + 8-methyl-3-oxo-decanoyl-ACP[c0]
	rxn00527_c0	L-Tyrosine:2-oxoglutarate aminotransferase_c0	2-Oxoglutarate[c0] + L-Tyrosine[c0] <=> p-hydroxyphenylpyruvate[c0] + L-Glutamate[c0]
	rxn04052_c0	precorrin-8X methylmutase_c0	Cobalt-precorrin 8[c0] <=> Cobyrinate[c0]
	rxn08549_c0	glycerol-3-phosphate acyltransferase (C16:0)_c0	Glycerol-3-phosphate[c0] + Palmitoyl-ACP[c0] => ACP[c0] + 1-hexadecanoyl-sn-glycerol 3-phosphate[c0]
	rxn13783_c0	DNA replication_c0	=> DNA replication[c0]
	rxn08126_c0	Amylomaltase (maltotriose)_c0	Maltose[c0] + Amylotriose[c0] <=> D-Glucose[c0] + Maltotetraose[c0]
	rxn09111_c0	Phosphatidylglycerol synthase (n-C16:0)_c0	Glycerol-3-phosphate[c0] + CDP-1,2-dihexadecanoylglycerol[c0] <=> Phosphatidylglycerophosphate dihexadecanoyl[c0] + CMP[c0]
	rxn09188_c0	Proline dehydrogenase_c0	FAD[c0] + L-Proline[c0] <=> FADH2[c0] + 1-Pyrroline-5-carboxylate[c0]
	rxn08847_c0	Lysophospholipase L2 (2-acylglycerophosphoglycerol, n-C14:1)_c0	H2O[c0] + 2-Acyl-sn-glycero-3-phosphoglycerol tetradec-7-enoyl[c0] => H+[c0] + tetradecenoate[c0] + Glycerophosphoglycerol[c0]
	rxn01974_c0	LL-2,6-Diaminoheptanedioate 2-epimerase_c0	LL-2,6-Diaminopimelate[c0] <=> meso-2,6-Diaminopimelate[c0]
	rxn03244_c0	(S)-Hydroxydecanoyl-CoA:NAD+ oxidoreductase_c0	(S)-Hydroxydecanoyl-CoA[c0] + NAD[c0] <=> H+[c0] + NADH[c0] + 3-Oxodecanoyl-CoA[c0]
	rxn01274_c0	S-(2-Hydroxyacyl)glutathione hydrolase_c0	H2O[c0] + (R)-S-Lactoylglutathione[c0] => H+[c0] + GSH[c0] + D-Lactate[c0]
	rxn12645_c0	aminopeptidase_c0	gly-asn-L[c0] + H2O[c0] <=> L-Asparagine[c0] + Glycine[c0]
	rxn00010_c0	Glyoxylate carboxy-lyase (dimerizing)_c0	H+[c0] + (2)Glyoxalate[c0] => Tartronate semialdehyde[c0] + CO2[c0]
	rxn02008_c0	UDP-N-acetylmuramoyl-L-alanine:D-glutamate ligase(ADP-forming)_c0	UDP-N-acetylmuramoyl-L-alanine[c0] + D-Glutamate[c0] + ATP[c0] => H+[c0] + Phosphate[c0] + UDP-N-acetylmuramoyl-L-alanyl-D-glutamate[c0] + ADP[c0]
	rxn03534_c0	Precorrin 5 <=> Precorrin 6X_c0	H2O[c0] + S-Adenosyl-L-methionine[c0] + Precorrin 5[c0] <=> Precorrin 6A[c0] + (2)H+[c0] + S-Adenosyl-homocysteine[c0] + Acetate[c0]
	rxn05385_c0	5-methyl-3-oxo-hexanoyl-ACP:NADP+ oxidoreductase_c0	5-methyl-3-oxo-hexanoyl-ACP[c0] + H+[c0] + NADPH[c0] <=> NADP[c0] + 5-methyl-3-hydroxy-hexanoyl-ACP[c0]
	rxn05443_c0	13-methyl-trans-tetra-dec-2-enoyl-ACP:NAD+ oxidoreductase (A-specific)_c0	H+[c0] + NADH[c0] + 13-methyl-trans-tetra-dec-2-enoyl-ACP[c0] => 13-methyl-tetra-decanoyl-ACP[c0] + NAD[c0]
	rxn02155_c0	ATP:nicotinamide-nucleotide adenylyltransferase_c0	ATP[c0] + Nicotinate ribonucleotide[c0] <=> PPi[c0] + Deamido-NAD[c0]
	rxn00915_c0	GMP:pyrophosphate phosphoribosyltransferase_c0	GMP[c0] + PPi[c0] <= Guanine[c0] + PRPP[c0]
	rxn00299_c0	GTP 7,8-8,9-dihydrolase_c0	H2O[c0] + GTP[c0] => H+[c0] + 7,8-Dihydroneopterin 3'-triphosphate[c0] + Formate[c0]
	rxn00839_c0	ATP:nucleoside-diphosphate phosphatransferase_c0	ATP[c0] + dADP[c0] <=> dATP[c0] + ADP[c0]
	rxn00461_c0	Phosphoenolpyruvate:UDP-N-acetyl-D-glucosamine_c0	Phosphoenolpyruvate[c0] + UDP-N-acetylglucosamine[c0] <=> UDP-N-acetylglucosamine enolpyruvate[c0] + H+[c0] + Phosphate[c0]
	rxn08089_c0	1-octadec-7-enoyl-sn-glycerol 3-phosphate O-acyltransferase (n-C18:1)_c0	1-octadec-11-enoyl-sn-glycerol 3-phosphate[c0] + Octadecenoyl-ACP[c0] => ACP[c0] + 1,2-dioctadec-11-enoyl-sn-glycerol 3-phosphate[c0]
	rxn05434_c0	6-methyl-trans-oct-2-enoyl-ACP:NAD+ oxidoreductase (A-specific)_c0	H+[c0] + NADH[c0] + 6-methyl-trans-oct-2-enoyl-ACP[c0] => 6-methyl-octanoyl-ACP[c0] + NAD[c0]
	rxn00283_c0	L-Alanine racemase_c0	L-Alanine[c0] <=> D-Alanine[c0]
	rxn10212_c0	myristoyl-1-acylglycerol-3-phosphate O-acyltransferase_c0	1-tetradecanoyl-sn-glycerol 3-phosphate[c0] + Myristoyl-CoA[c0] => 1,2-ditetradecanoyl-sn-glycerol 3-phosphate[c0] + CoA[c0]
	rxn00953_c0	L-Serine hydro-lyase (adding homocysteine)_c0	Homocysteine[c0] + L-Serine[c0] <=> H2O[c0] + Cystathionine[c0]
	rxn10337_c0	isoheptadecanoyl-cardiolipin synthase_c0	(2)Diisoheptadecanoylphosphatidylglycerol[c0] <=> Isoheptadecanoylcardiolipin (B. subtilis)[c0] + Glycerol[c0]
	rxn10235_c0	isopentadecanoyl-phosphatidylserine decarboxylase_c0	(2)H+[c0] + Diisopentadecanoylphosphatidylserine[c0] <=> Diisopentadecanoylphosphatidylethanolamine[c0] + CO2[c0]
	rxn00137_c0	Adenosine 3',5'-bisphosphate 3'(2')-phosphohydrolase_c0	Adenosine 3-5-bisphosphate[c0] + H2O[c0] => H+[c0] + AMP[c0] + Phosphate[c0]
	rxn08812_c0	Lysophospholipase L1 (2-acylglycerophosphoglycerol, n-C14:1) (periplasm)_c0	H2O[c0] + 1-Acyl-sn-glycero-3-phosphoglycerol tetradec-7-enoyl[c0] <=> H+[c0] + tetradecenoate[c0] + Glycerophosphoglycerol[c0]
	rxn05417_c0	6-methyl-heptanoyl-ACP:malonyl-[acyl-carrier-protein] C-acyltransferase (decarboxylating)_c0	H+[c0] + Malonyl-acyl-carrierprotein-[c0] + 6-methyl-heptanoyl-ACP[c0] => 8-methyl-3-oxo-nonanoyl-ACP[c0] + ACP[c0] + CO2[c0]
	rxn01022_c0	5'-Methylthioadenosine:orthophosphate_c0	H+[c0] + 5-Methylthioadenosine[c0] + Phosphate[c0] <=> Adenine[c0] + methylthioribose-1-phosphate[c0]
	rxn10221_c0	anteisoheptadecanoyl-phosphatidate cytidylyltransferase_c0	1,2-dianteisoheptadecanoyl-sn-glycerol 3-phosphate[c0] + CTP[c0] <=> CDP-1,2-dianteisoheptadecanoylglycerol[c0] + PPi[c0]
	rxn09177_c0	phosphopantothenate-cysteine ligase_c0	L-Cysteine[c0] + 4-phosphopantothenate[c0] + CTP[c0] => PPi[c0] + (R)-4'-Phosphopantothenoyl-L-cysteine[c0] + CMP[c0]
	rxn03437_c0	(R)-2,3-Dihydroxy-3-methylpentanoate hydro-lyase_c0	2,3-Dihydroxy-3-methylvalerate[c0] => 3MOP[c0] + H2O[c0]
	rxn09199_c0	Phosphatidylserine decarboxylase (n-C14:1)_c0	(2)H+[c0] + phosphatidylserine ditetradec-7-enoyl[c0] <=> phosphatidylethanolamine ditetradec-7-enoyl[c0] + CO2[c0]
	rxn02320_c0	5-Amino-2-oxopentanoate:2-oxoglutarate aminotransferase_c0	L-histidinol-phosphate[c0] + 2-Oxoglutarate[c0] <=> imidazole acetol-phosphate[c0] + L-Glutamate[c0]
	rxn00882_c0	myo-Inositol 4-phosphate phosphahydrolase_c0	H2O[c0] + Inositol 4-phosphate[c0] => L-Inositol[c0] + H+[c0] + Phosphate[c0]
	rxn10126_c0	succinate dehyrdogenase_c0	Ubiquinone-8[c0] + FADH2[c0] => FAD[c0] + Ubiquinol-8[c0]
	rxn12405_c0	transport of (r)-3-hydroxybutanoate [extraorganism-cytosol](passive)_c0	(R)-3-Hydroxybutanoate[e0] <=> (R)-3-Hydroxybutanoate[c0]
	rxn07587_c0	rxn07587_c0	Cobalt-precorrin 5B[c0] + S-Adenosyl-L-methionine[c0] <=> Cobalt-precorrin 6[c0] + H+[c0] + S-Adenosyl-homocysteine[c0]
	rxn08083_c0	1-tetradecanoyl-sn-glycerol 3-phosphate O-acyltransferase (n-C12:0)_c0	1-dodecanoyl-sn-glycerol 3-phosphate[c0] + Dodecanoyl-ACP[c0] => 1,2-didodecanoyl-sn-glycerol 3-phosphate[c0] + ACP[c0]
	rxn08808_c0	Lysophospholipase L1 (2-acylglycerophosphoethanolamine, n-C18:0) (periplasm)_c0	H+[c0] + H2O[c0] + L-2-Lysophosphatidylethanolamine[c0] => ocdca[c0] + Glycerophosphoethanolamine[c0]
	rxn02507_c0	1-(2-Carboxyphenylamino)-1-deoxy-D-ribulose-5-phosphate_c0	H+[c0] + 1-(2-carboxyphenylamino)-1-deoxyribulose 5-phosphate[c0] => Indoleglycerol phosphate[c0] + H2O[c0] + CO2[c0]
	rxn03901_c0	Undecaprenyl-diphosphate phosphohydrolase_c0	Bactoprenyl diphosphate[c0] + H2O[c0] => H+[c0] + Phosphate[c0] + Undecaprenylphosphate[c0]
	rxn03933_c0	UDP-N-acetylglucosamine-N-acetylmuramyl-(pentapeptide)pyrophosphoryl-undecaprenol N-acetylglucosamine transferase_c0	MurAc(oyl-L-Ala-D-gamma-Glu-L-Lys-D-Ala-D-Ala)-diphospho- undecaprenol[c0] + UDP-N-acetylglucosamine[c0] <=> UDP[c0] + Undecaprenyl-diphospho-N-acetylmuramoyl-(N-acetylglucosamine)-L-alanyl-gamma-D-glutamyl-L-lysyl-D-alanyl-D-alanine[c0]
	rxn00669_c0	Propanoate:CoA ligase (ADP-forming)_c0	ATP[c0] + Propionate[c0] + CoA[c0] <=> Propionyl-CoA[c0] + Phosphate[c0] + ADP[c0]
	rxn05202_c0	Xanthine ion-coupled transport_c0	H+[e0] + XAN[e0] <=> H+[c0] + XAN[c0]
	rxn00601_c0	succinyl-CoA:L-arginine N2-succinyltransferase_c0	Succinyl-CoA[c0] + L-Arginine[c0] => N2-Succinyl-L-arginine[c0] + H+[c0] + CoA[c0]
	rxn05226_c0	Glucose-phosphotransferase (PTS) system_c0	D-Glucose[e0] + Phosphoenolpyruvate[c0] <=> Pyruvate[c0] + D-glucose-6-phosphate[c0]
	rxn05537_c0	Dipeptide transport via ABC system (gly-asp)_c0	gly-asp-L[e0] + ATP[c0] + H2O[c0] => H+[c0] + gly-asp-L[c0] + Phosphate[c0] + ADP[c0]
	rxn10209_c0	anteisopentadecanoyl-glycerol-3-phosphate O-acyltransferase_c0	Glycerol-3-phosphate[c0] + fa4coa[c0] => CoA[c0] + 1-anteisopentadecanoyl-sn-glycerol 3-phosphate[c0]
	rxn09105_c0	phosphatidylglycerol phosphate phosphatase (n-C16:1)_c0	H2O[c0] + Phosphatidylglycerophosphate dihexadec-9-enoyl[c0] => Phosphatidylglycerol dihexadec-9-enoyl[c0] + H+[c0] + Phosphate[c0]
	rxn01333_c0	Sedoheptulose-7-phosphate:D-glyceraldehyde-3-phosphate_c0	Sedoheptulose7-phosphate[c0] + Glyceraldehyde3-phosphate[c0] <=> D-Erythrose4-phosphate[c0] + D-fructose-6-phosphate[c0]
	rxn01626_c0	5,6-Dihydrouracil amidohydrolase_c0	H2O[c0] + Hydrouracil[c0] => H+[c0] + 3-Ureidopropanoate[c0]
	rxn08806_c0	Lysophospholipase L1 (2-acylglycerophosphoethanolamine, n-C16:0) (periplasm)_c0	H2O[c0] + 1-Acyl-sn-glycero-3-phosphoethanolamine hexadecanoyl[c0] <=> H+[c0] + Palmitate[c0] + Glycerophosphoethanolamine[c0]
	rxn05560_c0	D-fructose transport via PEP:Pyr PTS_c0	Phosphoenolpyruvate[c0] + D-Fructose[e0] <=> D-fructose-1-phosphate[c0] + Pyruvate[c0]
	rxn00714_c0	P1,P4-Bis(5'-nucleosyl)-tetraphosphate nucleotidohydrolase_c0	H2O[c0] + UppppU[c0] => UMP[c0] + UTP[c0]
	rxn08291_c0	D-Amino acid dehydrogenase_c0	FAD[c0] + H2O[c0] + D-Alanine[c0] <=> Pyruvate[c0] + NH3[c0] + FADH2[c0]
	rxn05737_c0	FMN-dependent monooxygenase (taurine)_c0	Taurine[c0] + FMNH2[c0] + O2[c0] => H2O[c0] + Aminoacetaldehyde[c0] + Sulfite[c0] + FMN[c0]
	rxn06865_c0	Endotoxin Synthesis (lauroyl transferase)_c0	ACP[c0] + Lauroyl-KDO2-lipid IV(A)[c0] <= Dodecanoyl-ACP[c0] + kdo2-lipid iva[c0]
	rxn00303_c0	ATP:GTP 3'-pyrophosphotransferase_c0	ATP[c0] + GTP[c0] <=> AMP[c0] + Guanosine 5'-triphosphate,3'-diphosphate[c0]
	rxn01434_c0	L-Citrulline:L-aspartate ligase (AMP-forming)_c0	ATP[c0] + L-Aspartate[c0] + Citrulline[c0] <=> AMP[c0] + L-Argininosuccinate[c0] + PPi[c0]
	rxn00693_c0	5-Methyltetrahydrofolate:L-homocysteine S-methyltransferase_c0	5-Methyltetrahydrofolate[c0] + Homocysteine[c0] <=> L-Methionine[c0] + Tetrahydrofolate[c0]
	rxn00638_c0	GDP-D-mannose:NAD+ 6-oxidoreductase_c0	H2O[c0] + (2)NAD[c0] + GDP-mannose[c0] <=> (3)H+[c0] + (2)NADH[c0] + GDP-D-mannuronate[c0]
	rxn00122_c0	ATP:FMN adenylyltransferase_c0	ATP[c0] + FMN[c0] => FAD[c0] + PPi[c0]
	rxn01116_c0	D-Ribulose-5-phosphate 3-epimerase_c0	D-Ribulose5-phosphate[c0] <=> D-Xylulose5-phosphate[c0]
	rxn00470_c0	L-Ornithine carboxy-lyase_c0	H+[c0] + Ornithine[c0] => Putrescine[c0] + CO2[c0]
	rxn05585_c0	hexanesulfonate transport via ABC system_c0	ATP[c0] + H2O[c0] + hexanesulfonate[e0] => H+[c0] + Phosphate[c0] + hexanesulfonate[c0] + ADP[c0]
	rxn03908_c0	ATP: 4-(Cytidine 5'-diphospho)-2-C-methyl-D-erythritol_c0	4--cytidine5-diphospho-2-C-methyl-D-erythritol[c0] + ATP[c0] <=> 2-phospho-4--cytidine5-diphospho-2-C-methyl-D-erythritol[c0] + ADP[c0]
	rxn05436_c0	10-methyl-trans-dodec-2-enoyl-ACP:NAD+ oxidoreductase (A-specific)_c0	H+[c0] + NADH[c0] + 10-methyl-trans-dodec-2-enoyl-ACP[c0] => 10-methyl-dodecanoyl-ACP[c0] + NAD[c0]
	rxn08551_c0	glycerol-3-phosphate acyltransferase (C18:0)_c0	Octadecanoyl-ACP[c0] + Glycerol-3-phosphate[c0] => 1-octadecanoyl-sn-glycerol 3-phosphate[c0] + ACP[c0]
	rxn08308_c0	CDP-diacylglycerol synthetase (n-C14:1)_c0	1,2-ditetradec-7-enoyl-sn-glycerol 3-phosphate[c0] + CTP[c0] <=> PPi[c0] + CDP-1,2-ditetradec-7-enoylglycerol[c0]
	rxn00409_c0	ATP:nucleoside-diphosphate phosphatransferase_c0	ATP[c0] + CDP[c0] <=> ADP[c0] + CTP[c0]
	rxn06526_c0	NADPH:protein-disulfide oxidoreductase_c0	NADP[c0] + Protein dithiol[c0] <=> Protein disulfide[c0] + H+[c0] + NADPH[c0]
	rxn08841_c0	Lysophospholipase L2 (2-acylglycerophosphoethanolamine, n-C16:0)_c0	2-Acyl-sn-glycero-3-phosphoethanolamine (n-C16:0)[c0] + H2O[c0] <=> H+[c0] + Palmitate[c0] + Glycerophosphoethanolamine[c0]
	rxn07434_c0	rxn07434_c0	3MOP[c0] + H+[c0] + TPP[c0] => CO2[c0] + 2-Methyl-1-hydroxybutyl-TPP[c0]
	rxn02213_c0	3-Dehydroquinate hydro-lyase_c0	5-Dehydroquinate[c0] => H2O[c0] + 3-Dehydroshikimate[c0]
	rxn08669_c0	Glycerophosphodiester phosphodiesterase (Glycerophosphoglycerol)_c0	H2O[c0] + Glycerophosphoglycerol[c0] => Glycerol-3-phosphate[c0] + Glycerol[c0]
	rxn02200_c0	2-Amino-4-hydroxy-6-hydroxymethyl-7,8-dihydropteridine:4-_c0	6-hydroxymethyl dihydropterin[c0] + ABEE[c0] <=> Dihydropteroate[c0] + H2O[c0]
	rxn05397_c0	11-methyl-3-oxo-dodecanoyl-ACP:NADP+ oxidoreductase_c0	H+[c0] + 11-methyl-3-oxo-dodecanoyl-ACP[c0] + NADPH[c0] <=> 11-methyl-3-hydroxy-dodecanoyl-ACP[c0] + NADP[c0]
	rxn00616_c0	sn-Glycerol-3-phosphate:(acceptor) 2-oxidoreductase_c0	FAD[c0] + Glycerol-3-phosphate[c0] <=> FADH2[c0] + Glycerone-phosphate[c0]
	rxn04308_c0	di-trans,poly-cis-Decaprenyl-diphosphate:isopentenyl-diphosphate_c0	(7)Isopentenyldiphosphate[c0] + trans,trans,cis-Geranylgeranyl diphosphate[c0] => Bactoprenyl diphosphate[c0] + (7)PPi[c0]
	rxn03062_c0	3-Isopropylmalate:NAD+ oxidoreductase_c0	NAD[c0] + 3-Isopropylmalate[c0] <=> 2-isopropyl-3-oxosuccinate[c0] + H+[c0] + NADH[c0]
	rxn01973_c0	N-Succinyl-LL-2,6-diaminoheptanedioate amidohydrolase_c0	N-Succinyl-L-2,6-diaminopimelate[c0] + H2O[c0] <=> LL-2,6-Diaminopimelate[c0] + Succinate[c0]
	rxn00506_c0	Acetaldehyde:NAD+ oxidoreductase_c0	H2O[c0] + NAD[c0] + Acetaldehyde[c0] => (2)H+[c0] + NADH[c0] + Acetate[c0]
	rxn04384_c0	adenosylcobyric acid:(R)-1-aminopropan-2-yl phosphate ligase_c0	ATP[c0] + Adenosylcobyric acid[c0] + (R)-1-Aminopropan-2-yl phosphate[c0] <=> (2)H+[c0] + Phosphate[c0] + Adenosyl cobinamide phosphate[c0] + ADP[c0]
	rxn01388_c0	isocitrate hydro-lyase_c0	Isocitrate[c0] <=> cis-Aconitate[c0] + H2O[c0]
	rxn05421_c0	8-methyl-nonanoyl-ACP:malonyl-[acyl-carrier-protein] C-acyltransferase (decarboxylating)_c0	8-methyl-nonanoyl-ACP[c0] + H+[c0] + Malonyl-acyl-carrierprotein-[c0] => ACP[c0] + 10-methyl-3-oxo-undecanoyl-ACP[c0] + CO2[c0]
	rxn10214_c0	isoheptadecanoyl-1-acylglycerol-3-phosphate O-acyltransferase_c0	fa11coa[c0] + 1-isoheptadecanoyl-sn-glycerol 3-phosphate[c0] => 1,2-diisoheptadecanoyl-sn-glycerol 3-phosphate[c0] + CoA[c0]
	rxn01791_c0	(R)-Pantoate:beta-alanine ligase (AMP-forming)_c0	beta-Alanine[c0] + ATP[c0] + Pantoate[c0] => AMP[c0] + PAN[c0] + PPi[c0]
	rxn05578_c0	glycerol-3-phosphate transport in via proton symport_c0	H+[e0] + Glycerol-3-phosphate[e0] <=> H+[c0] + Glycerol-3-phosphate[c0]
	rxn03245_c0	(S)-Hydroxydecanoyl-CoA hydro-lyase_c0	(S)-Hydroxydecanoyl-CoA[c0] <=> H2O[c0] + (2E)-Decenoyl-CoA[c0]
	rxn00020_c0	beta-D-Glucoside glucohydrolase_c0	H2O[c0] + CELB[c0] => (2)beta-D-Glucose[c0]
	rxn03446_c0	O-Phospho-4-hydroxy-L-threonine phospho-lyase (adding water)_c0	H2O[c0] + 4-(Phosphonooxy)-threonine[c0] => 4-Hydroxy-L-threonine[c0] + H+[c0] + Phosphate[c0]
	rxn01519_c0	dUTP nucleotidohydrolase_c0	dUTP[c0] + H2O[c0] => PPi[c0] + dUMP[c0]
	rxn00029_c0	5-Aminolevulinate hydro-lyase(adding 5-aminolevulinate and_c0	(2)5-Aminolevulinate[c0] => H+[c0] + (2)H2O[c0] + Porphobilinogen[c0]
	rxn03060_c0	2-Hydroxybutane-1,2,3-tricarboxylate hydro-lyase_c0	2-Methylcitrate[c0] <=> cis-2-Methylaconitate[c0] + H2O[c0]
	rxn00242_c0	Guanosine-3',5'-bis(diphosphate) 3'-pyrophosphohydrolase_c0	Guanosine 3',5'-bis(diphosphate)[c0] + H2O[c0] => PPi[c0] + GDP[c0]
	rxn01975_c0	beta-D-Glucose-6-phosphate:NADP+ 1-oxoreductase_c0	NADP[c0] + beta-D-Glucose 6-phosphate[c0] <=> H+[c0] + 6-phospho-D-glucono-1-5-lactone[c0] + NADPH[c0]
	rxn10338_c0	anteisoheptadecanoyl-cardiolipin synthase_c0	(2)Dianteisoheptadecanoylphosphatidylglycerol[c0] <=> Anteisoheptadecanoylcardiolipin (B. subtilis)[c0] + Glycerol[c0]
	rxn03491_c0	S-Adenosyl-L-methionine:1-precorrin-6Y C5,15-methyltransferase_c0	Precorrin 6B[c0] + (2)S-Adenosyl-L-methionine[c0] <=> (2)H+[c0] + Precorrin 8[c0] + (2)S-Adenosyl-homocysteine[c0] + CO2[c0]
	rxn04413_c0	rxn04413_c0	Adenosyl cobinamide[c0] + GTP[c0] <=> H+[c0] + Adenosyl cobinamide phosphate[c0] + GDP[c0]
	rxn05329_c0	(3R)-3-Hydroxybutanoyl-[acyl-carrier-protein] hydro-lyase_c0	(R)-3-Hydroxybutanoyl-[acyl-carrier protein][c0] <=> H2O[c0] + But-2-enoyl-[acyl-carrier protein][c0]
	rxn10263_c0	anteisopentadecanoyl-CDPdiacylglycerol:sn-glycerol-3-phosphate 3-phosphatidyltransferase_c0	Glycerol-3-phosphate[c0] + CDP-1,2-dianteisopentadecanoylglycerol[c0] <=> Dianteisopentadecanoylphosphatidylglycerophosphate[c0] + CMP[c0]
	rxn05647_c0	salicin transport via PEP:Pyr PTS_c0	Salicin[e0] + Phosphoenolpyruvate[c0] <=> Pyruvate[c0] + Salicin-6P[c0]
	rxn01964_c0	L-Serine hydro-lyase (adding indoleglycerol-phosphate)_c0	Indoleglycerol phosphate[c0] + L-Serine[c0] => L-Tryptophan[c0] + Glyceraldehyde3-phosphate[c0] + H2O[c0]
	rxn10113_c0	cytochrome oxidase bo3 (ubiquinol-8: 2.5 protons)_c0	(2.5)H+[c0] + Ubiquinol-8[c0] + (0.5)O2[c0] => (2.5)H+[e0] + H2O[c0] + Ubiquinone-8[c0]
	rxn08615_c0	glycogen synthase (ADPGlc)_c0	ADPglucose[c0] + glycogen(n-1)[c0] <=> ADP[c0] + Glycogen[c0]
	rxn00559_c0	D-Mannose-6-phosphate ketol-isomerase_c0	D-mannose-6-phosphate[c0] <=> D-fructose-6-phosphate[c0]
	rxn03919_c0	D-glycero-D-manno-heptose 1,7-bisphosphate phosphatase_c0	H2O[c0] + D-Glycero-D-manno-heptose1-7-bisphosphate[c0] => H+[c0] + Phosphate[c0] + D-Glycero-D-manno-heptose1-phosphate[c0]
	rxn10341_c0	anteisopentadecanoyl-cardiolipin synthase_c0	(2)Dianteisopentadecanoylphosphatidylglycerol[c0] <=> Anteisopentadecanoylcardiolipin (B. subtilis)[c0] + Glycerol[c0]
	rxn00208_c0	Pyridoxamine-5'-phosphate:oxygen oxidoreductase (deaminating)_c0	H2O[c0] + Pyridoxamine phosphate[c0] + O2[c0] => Pyridoxal phosphate[c0] + NH3[c0] + H2O2[c0]
	rxn10043_c0	cytochrome-c oxidase (H+/e- = 2)_c0	(6)H+[c0] + (2)Cytochrome c2+[c0] + (0.5)O2[c0] <=> (4)H+[e0] + H2O[c0] + (2)Cytochrome c3+[c0]
	rxn03537_c0	Adenosyl cobinamide phosphate guanyltransferase_c0	H+[c0] + Adenosyl cobinamide phosphate[c0] + GTP[c0] <=> Adenosylcobinamide-GDP[c0] + PPi[c0]
	rxn05427_c0	12-methyl-3-hydroxy-tridecanoyl-ACP hydro-lyase_c0	12-methyl-3-hydroxy-tridecanoyl-ACP[c0] <=> H2O[c0] + 12-methyl-trans-tridec-2-enoyl-ACP[c0]
	rxn10269_c0	anteisopentadecanoyl-Phosphatidylglycerophosphate phosphohydrolase_c0	H2O[c0] + Dianteisopentadecanoylphosphatidylglycerophosphate[c0] => Dianteisopentadecanoylphosphatidylglycerol[c0] + H+[c0] + Phosphate[c0]
	rxn05392_c0	7-methyl-octanoyl-ACP:malonyl-[acyl-carrier-protein] C-acyltransferase (decarboxylating)_c0	H+[c0] + Malonyl-acyl-carrierprotein-[c0] + 7-methyl-octanoyl-ACP[c0] => 9-methyl-3-oxo-decanoyl-ACP[c0] + ACP[c0] + CO2[c0]
	rxn05176_c0	Thiosulfate-ABC transport_c0	ATP[c0] + H2O[c0] + H2S2O3[e0] => H+[c0] + Phosphate[c0] + H2S2O3[c0] + ADP[c0]
	rxn00161_c0	(S)-Malate:NADP+ oxidoreductase(oxaloacetate-decarboxylating)_c0	L-Malate[c0] + NADP[c0] => Pyruvate[c0] + CO2[c0] + NADPH[c0]
	rxn05231_c0	Ribonucleotide reductase: ADP_c0	trdrd[c0] + ADP[c0] => trdox[c0] + H2O[c0] + dADP[c0]
	rxn09207_c0	Phosphatidylserine syntase (n-C14:1)_c0	L-Serine[c0] + CDP-1,2-ditetradec-7-enoylglycerol[c0] => H+[c0] + phosphatidylserine ditetradec-7-enoyl[c0] + CMP[c0]
	rxn01477_c0	6-Phospho-D-gluconate hydro-lyase_c0	6-Phospho-D-gluconate[c0] => H2O[c0] + 2-Keto-3-deoxy-6-phosphogluconate[c0]
	rxn00474_c0	L-Serine hydro-lyase (adding indoleglycerol-phosphate)_c0	indol[c0] + L-Serine[c0] => L-Tryptophan[c0] + H2O[c0]
	rxn09114_c0	Phosphatidylglycerol synthase (n-C18:1)_c0	CDP-1,2-dioctadec-11-enoylglycerol[c0] + Glycerol-3-phosphate[c0] <=> Phosphatidylglycerophosphate dioctadec-11-enoyl[c0] + CMP[c0]
	rxn05306_c0	PHEt6_c0	H+[e0] + L-Phenylalanine[e0] <=> H+[c0] + L-Phenylalanine[c0]
	rxn05582_c0	glycine transport in/out via proton symport_c0	H+[e0] + Glycine[e0] <=> H+[c0] + Glycine[c0]
	rxn03435_c0	(R)-2,3-Dihydroxy-3-methylpentanoate:NADP+ oxidoreductase_c0	NADP[c0] + 2,3-Dihydroxy-3-methylvalerate[c0] <=> H+[c0] + (R)-3-Hydroxy-3-methyl-2-oxopentanoate[c0] + NADPH[c0]
	rxn01635_c0	1-Pyrroline-4-hydroxy-2-carboxylate aminohydrolase (decyclizing)_c0	H+[c0] + 1-Pyrroline-4-hydroxy-2-carboxylate[c0] + H2O[c0] <= 2,5-Dioxopentanoate[c0] + NH3[c0]
	rxn08815_c0	Lysophospholipase L1 (2-acylglycerophosphoglycerol, n-C18:0) (periplasm)_c0	H2O[c0] + 1-Acyl-sn-glycero-3-phosphoglycerol octadecanoyl[c0] <=> ocdca[c0] + H+[c0] + Glycerophosphoglycerol[c0]
	rxn01673_c0	ATP:nucleoside-diphosphate phosphatransferase_c0	ATP[c0] + dCDP[c0] <=> dCTP[c0] + ADP[c0]
	rxn12845_c0	Gly-Leu aminopeptidase_c0	Gly-Leu[c0] + H2O[c0] <=> L-Leucine[c0] + Glycine[c0]
	rxn00085_c0	L-Glutamate:NADP+ oxidoreductase (transaminating)_c0	NADP[c0] + (2)L-Glutamate[c0] <=> H+[c0] + 2-Oxoglutarate[c0] + L-Glutamine[c0] + NADPH[c0]
	rxn05340_c0	(3R)-3-Hydroxydodecanoyl-[acyl-carrier-protein]:NADP+ oxidoreductase_c0	NADP[c0] + D-3-Hydroxydodecanoyl-[acp][c0] <=> 3-oxododecanoyl-acp[c0] + H+[c0] + NADPH[c0]
	rxn00832_c0	IMP 1,2-hydrolase (decyclizing)_c0	IMP[c0] + H2O[c0] <=> FAICAR[c0]
	rxn01746_c0	Allantoate amidinohydrolase_c0	H2O[c0] + Allantoate[c0] <=> Urea[c0] + Ureidoglycolate[c0]
	rxn08817_c0	Lysophospholipase L2 (2-acylglycerophosphotidate, n-C12:0)_c0	H2O[c0] + 2-dodecanoyl-sn-glycerol 3-phosphate[c0] <=> H+[c0] + ddca[c0] + Glycerol-3-phosphate[c0]
	rxn00251_c0	Orthophosphate:oxaloacetate carboxyl-lyase (phosphorylating)_c0	(2)H+[c0] + Oxaloacetate[c0] + Phosphate[c0] <=> H2O[c0] + CO2[c0] + Phosphoenolpyruvate[c0]
	rxn00295_c0	UDP-N-acetyl-D-glucosamine 4-epimerase_c0	UDP-N-acetylglucosamine[c0] <=> UDP-N-acetyl-D-galactosamine[c0]
	rxn02187_c0	2-Acetolactate methylmutase_c0	ALCTT[c0] <=> 2-Oxo-3-hydroxyisovalerate[c0]
	rxn01578_c0	L-Pipecolate:NAD+ 2-oxidoreductase_c0	L-Pipecolate[c0] + NAD[c0] <=> delta1-Piperideine-2-carboxylate[c0] + H+[c0] + NADH[c0]
	rxn08467_c0	FMNH2-dependent monooxygenase_c0	Isethionate[c0] + FMNH2[c0] + O2[c0] => H2O[c0] + Sulfite[c0] + Glycolaldehyde[c0] + FMN[c0]
	rxn01219_c0	ATP:CMP phosphotransferase_c0	ATP[c0] + dCMP[c0] <=> dCDP[c0] + ADP[c0]
	rxn03514_c0	S-adenosyl-L-methionine:precorrin-4 C11 methyltransferase_c0	Precorrin 4[c0] + S-Adenosyl-L-methionine[c0] <=> H+[c0] + S-Adenosyl-homocysteine[c0] + Precorrin 5[c0]
	rxn01270_c0	L-Aspartate:2-oxoglutarate aminotransferase_c0	Pretyrosine[c0] + Oxaloacetate[c0] <=> Prephenate[c0] + L-Aspartate[c0]
	rxn08799_c0	Lysophospholipase L1 (2-acylglycerophosphotidate, n-C16:0) (periplasm)_c0	H2O[c0] + 1-hexadecanoyl-sn-glycerol 3-phosphate[c0] <=> H+[c0] + Glycerol-3-phosphate[c0] + Palmitate[c0]
	rxn05543_c0	Dipeptide transport via ABC system (ala-his)_c0	ATP[c0] + H2O[c0] + Ala-His[e0] => H+[c0] + Phosphate[c0] + Ala-His[c0] + ADP[c0]
	rxn01127_c0	ATP:AMP phosphotransferase_c0	dAMP[c0] + ATP[c0] <=> dADP[c0] + ADP[c0]
	rxn08309_c0	CDP-diacylglycerol synthetase (n-C16:0)_c0	1,2-dihexadecanoyl-sn-glycerol 3-phosphate[c0] + CTP[c0] <=> PPi[c0] + CDP-1,2-dihexadecanoylglycerol[c0]
	rxn03892_c0	PPTT_c0	pendp[c0] + Isopentenyldiphosphate[c0] => all-trans-Hexaprenyl diphosphate[c0] + PPi[c0]
	rxn10181_c0	NMN permease_c0	Nicotinamide ribonucleotide[e0] <=> Nicotinamide ribonucleotide[c0]
	rxn05461_c0	3-Hydroxyoctodecanoyl-ACP:NADP+ oxidoreductase_c0	H+[c0] + 3-Oxooctodecanoyl-ACP[c0] + NADPH[c0] <=> NADP[c0] + 3-Hydroxyoctodecanoyl-ACP[c0]
	rxn08312_c0	CDP-diacylglycerol synthetase (n-C18:1)_c0	1,2-dioctadec-11-enoyl-sn-glycerol 3-phosphate[c0] + CTP[c0] <=> CDP-1,2-dioctadec-11-enoylglycerol[c0] + PPi[c0]
	rxn00291_c0	N-succinyl-L-glutamate amidohydrolase_c0	N-Succinyl-L-glutamate[c0] + H2O[c0] <=> Succinate[c0] + L-Glutamate[c0]
	rxn12849_c0	Gly-Leu ABC transporters_c0	ATP[c0] + Gly-Leu[e0] + H2O[c0] => Gly-Leu[c0] + Phosphate[c0] + ADP[c0]
	rxn00772_c0	ATP:D-ribose 5-phosphotransferase_c0	D-Ribose[c0] + ATP[c0] <=> ADP[c0] + ribose-5-phosphate[c0]
	rxn00410_c0	UTP:ammonia ligase(ADP-forming)_c0	ATP[c0] + NH3[c0] + UTP[c0] <=> (2)H+[c0] + Phosphate[c0] + ADP[c0] + CTP[c0]
	rxn05160_c0	D-Ribose ABC transport_c0	D-Ribose[e0] + ATP[c0] + H2O[c0] => H+[c0] + D-Ribose[c0] + Phosphate[c0] + ADP[c0]
	rxn05152_c0	L-Aspartate-ABC transport_c0	ATP[c0] + L-Aspartate[e0] + H2O[c0] => H+[c0] + L-Aspartate[c0] + Phosphate[c0] + ADP[c0]
	rxn02792_c0	(5-Glutamyl)-peptide:amino-acid 5-glutamyltransferase_c0	L-3-Cyanoalanine[c0] + H+[c0] + L-Glutamate[c0] => gamma-Glutamyl-3-aminopropiononitrile[c0] + H2O[c0] + CO2[c0]
	rxn05368_c0	8-methyl-3-oxo-decanoyl-ACP:NADP+ oxidoreductase_c0	H+[c0] + 8-methyl-3-oxo-decanoyl-ACP[c0] + NADPH[c0] <=> NADP[c0] + 8-methyl-3-hydroxy-decanoyl-ACP[c0]
	rxn05221_c0	Na+:proline symport_c0	Na+[e0] + L-Proline[e0] <=> Na+[c0] + L-Proline[c0]
	rxn01013_c0	D-Glycerate:NADP+ 2-oxidoreductase_c0	NADP[c0] + Glycerate[c0] <=> H+[c0] + Hydroxypyruvate[c0] + NADPH[c0]
	rxn00872_c0	Butanoyl-CoA:oxygen 2-oxidoreductase_c0	FAD[c0] + Butyryl-CoA[c0] <= Crotonyl-CoA[c0] + FADH2[c0]
	rxn09210_c0	Phosphatidylserine syntase (n-C18:0)_c0	CDP-1,2-dioctadecanoylglycerol[c0] + L-Serine[c0] => H+[c0] + phosphatidylserine dioctadecanoyl[c0] + CMP[c0]
	rxn12224_c0	2-octaprenyl-6-methoxyphenol hydroxylase_c0	2-Octaprenyl-6-methoxyphenol[c0] + O2[c0] => H2O[c0] + 2-Octaprenyl-6-methoxy-1,4-benzoquinone[c0]
	rxn02405_c0	CTP:3-deoxy-D-manno-octulosonate cytidylyltransferase_c0	KDO[c0] + CTP[c0] => PPi[c0] + CMP-KDO[c0]
	rxn00782_c0	D-Glyceraldehyde-3-phosphate:NADP+ oxidoreductase(phosphorylating)_c0	Glyceraldehyde3-phosphate[c0] + NADP[c0] + Phosphate[c0] <= 1,3-Bisphospho-D-glycerate[c0] + NADPH[c0]
	rxn00395_c0	L-Arginine iminohydrolase_c0	H2O[c0] + L-Arginine[c0] => NH3[c0] + Citrulline[c0]
	rxn10256_c0	isopentadecanoyl-Diacylglycerol kinase_c0	ATP[c0] + 1,2-Diisopentadecanoyl-sn-glycerol[c0] <=> 1,2-diisopentadecanoyl-sn-glycerol 3-phosphate[c0] + ADP[c0]
	rxn01000_c0	Prephenate hydro-lyase (decarboxylating)_c0	Prephenate[c0] + H+[c0] => H2O[c0] + CO2[c0] + Phenylpyruvate[c0]
	rxn00675_c0	Propinol adenylate:CoA ligase (AMP-forming)_c0	CoA[c0] + Propionyladenylate[c0] => Propionyl-CoA[c0] + AMP[c0]
	rxn03630_c0	Taurine, 2-oxoglutarate:O2 oxidoreductase (sulfite-forming)_c0	Taurine[c0] + 2-Oxoglutarate[c0] + O2[c0] => Succinate[c0] + CO2[c0] + Aminoacetaldehyde[c0] + Sulfite[c0]
	rxn01138_c0	Adenosine:orthophosphate ribosyltransferase_c0	H+[c0] + Adenosine[c0] + Phosphate[c0] <=> Ribose 1-phosphate[c0] + Adenine[c0]
	rxn01867_c0	p-cumic alcohol:NAD+ oxidoreductase_c0	H2O[c0] + NAD[c0] + Betaine aldehyde[c0] => (2)H+[c0] + BET[c0] + NADH[c0]
	rxn02305_c0	2-Methyl-4-amino-5-hydroxymethylpyrimidine-diphosphate:4-methyl-5-_c0	H+[c0] + 4-Amino-2-methyl-5-diphosphomethylpyrimidine[c0] + 4-Methyl-5--2-phosphoethyl-thiazole[c0] <=> Thiamine phosphate[c0] + PPi[c0]
	rxn03384_c0	Uroporphyrinogen I carboxy-lyase_c0	(4)H+[c0] + UroporphyrinogenI[c0] <=> CoproporphyrinogenI[c0] + (4)CO2[c0]
	rxn05551_c0	ethanolamine transport in/out via proton symport_c0	Aminoethanol[e0] + H+[e0] <=> Aminoethanol[c0] + H+[c0]
	rxn05533_c0	Dipeptide transport via ABC system (ala-asp)_c0	ATP[c0] + H2O[c0] + ala-L-asp-L[e0] => H+[c0] + Phosphate[c0] + ADP[c0] + ala-L-asp-L[c0]
	rxn01507_c0	2'-Deoxyadenosine 5'-monophosphate phosphohydrolase_c0	dAMP[c0] + H2O[c0] => Deoxyadenosine[c0] + H+[c0] + Phosphate[c0]
	rxn10211_c0	palmitoyl-1-acylglycerol-3-phosphate O-acyltransferase_c0	Palmitoyl-CoA[c0] + 1-hexadecanoyl-sn-glycerol 3-phosphate[c0] => 1,2-dihexadecanoyl-sn-glycerol 3-phosphate[c0] + CoA[c0]
	rxn08838_c0	Lysophospholipase L2 (2-acylglycerophosphoethanolamine, n-C12:0)_c0	2-Acyl-sn-glycero-3-phosphoethanolamine dodecanoyl[c0] + H2O[c0] <=> H+[c0] + ddca[c0] + Glycerophosphoethanolamine[c0]
	rxn12641_c0	aminopeptidase_c0	H2O[c0] + L-alanylglycine[c0] <=> L-Alanine[c0] + Glycine[c0]
	rxn10116_c0	Glucose dehydrogenase (ubiquinone-8 as acceptor)_c0	D-Glucose[e0] + H2O[e0] + Ubiquinone-8[c0] => H+[e0] + Ubiquinol-8[c0] + GLCN[e0]
	rxn08821_c0	Lysophospholipase L2 (2-acylglycerophosphotidate, n-C16:1)_c0	H2O[c0] + 2-hexadec-9-enoyl-sn-glycerol 3-phosphate[c0] <=> H+[c0] + hexadecenoate[c0] + Glycerol-3-phosphate[c0]
	rxn10205_c0	isoheptadecanoyl-glycerol-3-phosphate O-acyltransferase_c0	Glycerol-3-phosphate[c0] + fa11coa[c0] => 1-isoheptadecanoyl-sn-glycerol 3-phosphate[c0] + CoA[c0]
	rxn00239_c0	ATP:(d)GMP phosphotransferase_c0	ATP[c0] + GMP[c0] <=> ADP[c0] + GDP[c0]
	rxn00612_c0	sn-Glycerol-3-phosphate:NADP+ 2-oxidoreductase_c0	NADP[c0] + Glycerol-3-phosphate[c0] <=> H+[c0] + Glycerone-phosphate[c0] + NADPH[c0]
	rxn05418_c0	8-methyl-3-oxo-nonanoyl-ACP:NADP+ oxidoreductase_c0	8-methyl-3-oxo-nonanoyl-ACP[c0] + H+[c0] + NADPH[c0] <=> 8-methyl-3-hydroxy-nonanoyl-ACP[c0] + NADP[c0]
	rxn00711_c0	UMP:pyrophosphate phosphoribosyltransferase_c0	UMP[c0] + PPi[c0] <= Uracil[c0] + PRPP[c0]
	rxn00991_c0	(S)-3-Hydroxy-3-methylglutaryl-CoA acetoacetate-lyase_c0	HMG-CoA[c0] <=> Acetoacetate[c0] + Acetyl-CoA[c0]
	rxn12633_c0	aminopeptidase_c0	H2O[c0] + ala-L-asp-L[c0] <=> L-Aspartate[c0] + L-Alanine[c0]
	rxn04113_c0	isopentenyl-diphosphate:NAD(P)+ oxidoreductase_c0	H+[c0] + 1-Hydroxy-2-methyl-2-butenyl 4-diphosphate[c0] + NADPH[c0] => Isopentenyldiphosphate[c0] + NADP[c0] + H2O[c0]
	rxn05250_c0	FACOAL160(ISO)_c0	H+[c0] + ATP[c0] + fa6[c0] + CoA[c0] => AMP[c0] + PPi[c0] + fa6coa[c0]
	rxn06023_c0	CoA:apo-[acyl-carrier-protein] pantetheinephosphotransferase_c0	apo-ACP[c0] + CoA[c0] <=> ACP[c0] + Adenosine 3-5-bisphosphate[c0]
	rxn01315_c0	L-Phenylalanine,tetrahydrobiopterin:oxygen oxidoreductase_c0	L-Phenylalanine[c0] + Tetrahydrobiopterin[c0] + O2[c0] => Dihydrobiopterin[c0] + H2O[c0] + L-Tyrosine[c0]
	rxn08850_c0	Lysophospholipase L2 (2-acylglycerophosphoglycerol, n-C18:0)_c0	H2O[c0] + 2-Acyl-sn-glycero-3-phosphoglycerol octadecanoyl[c0] <=> ocdca[c0] + H+[c0] + Glycerophosphoglycerol[c0]
	rxn03174_c0	2-Amino-4-hydroxy-6-(erythro-1,2,3-trihydroxypropyl)_c0	H2O[c0] + 7,8-Dihydroneopterin 3'-triphosphate[c0] <= 2,5-Diamino-6-(5'-triphosphoryl-3',4'-trihydroxy-2'-oxopentyl)- amino-4-oxopyrimidine[c0]
	rxn00146_c0	(R)-Lactate:ferricytochrome-c 2-oxidoreductase_c0	(2)Cytochrome c3+[c0] + D-Lactate[c0] <=> (2)H+[c0] + Pyruvate[c0] + (2)Cytochrome c2+[c0]
	rxn06586_c0	3-methylbutanoyl-CoA:enzyme N6-(dihydrolipoyl)lysine_c0	Isovaleryl-CoA[c0] + Dihydrolipoamide[c0] <=> S-(3-Methylbutanoyl)-dihydrolipoamide-E[c0] + CoA[c0]
	rxn00763_c0	Glycerol:NAD+ oxidoreductase_c0	NAD[c0] + Glycerol[c0] <=> H+[c0] + NADH[c0] + D-Glyceraldehyde[c0]
	rxn05393_c0	9-methyl-3-oxo-decanoyl-ACP:NADP+ oxidoreductase_c0	9-methyl-3-oxo-decanoyl-ACP[c0] + H+[c0] + NADPH[c0] <=> NADP[c0] + 9-methyl-3-hydroxy-decanoyl-ACP[c0]
	rxn00138_c0	Deamino-NAD+:ammonia ligase (AMP-forming)_c0	ATP[c0] + NH3[c0] + Deamido-NAD[c0] => AMP[c0] + NAD[c0] + PPi[c0]
	rxn00338_c0	L-aspartate oxidase_c0	L-Aspartate[c0] + O2[c0] => H+[c0] + Iminoaspartate[c0] + H2O2[c0]
	rxn03136_c0	1-(5'-Phosphoribosyl)-5-amino-4-(N-succinocarboxamide)-imidazole_c0	SAICAR[c0] <=> AICAR[c0] + Fumarate[c0]
	rxn01137_c0	Adenosine aminohydrolase_c0	H+[c0] + H2O[c0] + Adenosine[c0] => Inosine[c0] + NH3[c0]
	rxn05165_c0	L-Proline-ABC transport_c0	ATP[c0] + H2O[c0] + L-Proline[e0] => H+[c0] + Phosphate[c0] + L-Proline[c0] + ADP[c0]
	rxn08194_c0	cob(I)alamin adenosyltransferase_c0	ATP[c0] + Cbl[c0] <=> Triphosphate[c0] + Calomide[c0]
	rxn05440_c0	7-methyl-trans-oct-2-enoyl-ACP:NAD+ oxidoreductase (A-specific)_c0	7-methyl-trans-oct-2-enoyl-ACP[c0] + H+[c0] + NADH[c0] => NAD[c0] + 7-methyl-octanoyl-ACP[c0]
	rxn00988_c0	Acetoacetate:CoA ligase (AMP-forming)_c0	H+[c0] + ATP[c0] + Acetoacetate[c0] + CoA[c0] => AMP[c0] + PPi[c0] + Acetoacetyl-CoA[c0]
	rxn08557_c0	glycerol-3-phosphate dehydrogenase (menaquinone-8)_c0	Glycerol-3-phosphate[c0] + Menaquinone 8[c0] => Menaquinol 8[c0] + Glycerone-phosphate[c0]
	rxn05617_c0	mannitol transport via PEP:Pyr PTS_c0	D-Mannitol[e0] + Phosphoenolpyruvate[c0] <=> Pyruvate[c0] + D-mannitol-1-phosphate[c0]
	rxn04996_c0	dimethyallyl diphosphate:NADP+ oxidoreductase_c0	NADP[c0] + H2O[c0] + DMAPP[c0] <= H+[c0] + 1-Hydroxy-2-methyl-2-butenyl 4-diphosphate[c0] + NADPH[c0]
	rxn02835_c0	1-(5-phospho-D-ribosyl)-AMP 1,6-hydrolase_c0	H2O[c0] + Phosphoribosyl-AMP[c0] <=> phosphoribosylformiminoaicar-phosphate[c0]
	rxn02373_c0	L-Glutamate-5-semialdehyde:NADP+ 5-oxidoreductase (phosphorylationg)_c0	L-Glutamate5-semialdehyde[c0] + NADP[c0] + Phosphate[c0] <= L-Glutamyl 5-phosphate[c0] + NADPH[c0]
	rxn05581_c0	glycerol transport in/out via diffusion reversible_c0	Glycerol[c0] <=> Glycerol[e0]
	rxn00726_c0	Chorismate pyruvate-lyase (amino-accepting)_c0	NH3[c0] + Chorismate[c0] => H+[c0] + Pyruvate[c0] + H2O[c0] + Anthranilate[c0]
	rxn05287_c0	GGTT_c0	Isopentenyldiphosphate[c0] + Geranylgeranyl diphosphate[c0] => pendp[c0] + PPi[c0]
	rxn05345_c0	dodecanoyl-[acyl-carrier-protein]:malonyl-[acyl-carrier-protein]_c0	H+[c0] + Malonyl-acyl-carrierprotein-[c0] + Dodecanoyl-ACP[c0] => ACP[c0] + CO2[c0] + 3-oxotetradecanoyl-acp[c0]
	rxn02177_c0	Isochorismate pyruvate-hydrolase_c0	Isochorismate[c0] + H2O[c0] => Pyruvate[c0] + 2,3-Dihydroxy-2,3-dihydrobenzoate[c0]
	rxn10218_c0	anteisopentadecanoyl-1-acylglycerol-3-phosphate O-acyltransferase_c0	fa4coa[c0] + 1-anteisopentadecanoyl-sn-glycerol 3-phosphate[c0] => 1,2-dianteisopentadecanoyl-sn-glycerol 3-phosphate[c0] + CoA[c0]
	rxn03147_c0	1-(5-Phosphoribosyl)-5-amino-4-carboxyimidazole:L-aspartate ligase_c0	5'-Phosphoribosyl-4-carboxy-5-aminoimidazole[c0] + ATP[c0] + L-Aspartate[c0] => (2)H+[c0] + Phosphate[c0] + ADP[c0] + SAICAR[c0]
	rxn00095_c0	P1,P4-Bis(5'-nucleosyl)-tetraphosphate nucleotidebisphosphohydrolase_c0	H2O[c0] + AppppA[c0] => (2)ADP[c0]
	rxn02911_c0	(S)-3-Hydroxydodecanoyl-CoA hydro-lyase_c0	(S)-3-Hydroxydodecanoyl-CoA[c0] <=> (2E)-Dodecenoyl-CoA[c0] + H2O[c0]
	rxn01211_c0	5,10-Methenyltetrahydrofolate 5-hydrolase(decyclizing)_c0	H2O[c0] + 5-10-Methenyltetrahydrofolate[c0] <=> 10-Formyltetrahydrofolate[c0] + H+[c0]
	rxn08802_c0	Lysophospholipase L1 (2-acylglycerophosphotidate, n-C18:1) (periplasm)_c0	H2O[c0] + 1-octadec-11-enoyl-sn-glycerol 3-phosphate[c0] <=> octadecenoate[c0] + H+[c0] + Glycerol-3-phosphate[c0]
	rxn01602_c0	Dihydrofolate:NADP+ oxidoreductase_c0	NADP[c0] + Dihydrofolate[c0] <=> H+[c0] + Folate[c0] + NADPH[c0]
	rxn00670_c0	acetyl-CoA:phosphate acetyltransferase_c0	Propionyl-CoA[c0] + H+[c0] + Phosphate[c0] <=> Propionyl phosphate[c0] + CoA[c0]
	rxn10335_c0	myristoyl-cardiolipin synthase_c0	(2)Phosphatidylglycerol ditetradecanoyl[c0] <=> Myristoylcardiolipin (B. subtilis)[c0] + Glycerol[c0]
	rxn00371_c0	Formate:NAD+ oxidoreductase_c0	NAD[c0] + Formate[c0] => CO2[c0] + NADH[c0]
	rxn00539_c0	Ethanolamine ammonia-lyase_c0	Aminoethanol[c0] => NH3[c0] + Acetaldehyde[c0]
	rxn01924_c0	2-Methylpropanoyl-CoA:(acceptor) 2,3-oxidoreductase_c0	FAD[c0] + Isobutyryl-CoA[c0] <= Methacrylyl-CoA[c0] + FADH2[c0]
	rxn08848_c0	Lysophospholipase L2 (2-acylglycerophosphoglycerol, n-C16:0)_c0	H2O[c0] + 2-Acyl-sn-glycero-3-phosphoglycerol hexadecanoyl[c0] <=> H+[c0] + Palmitate[c0] + Glycerophosphoglycerol[c0]
	rxn05444_c0	15-methyl-trans-hexa-dec-2-enoyl-ACP:NAD+ oxidoreductase (A-specific)_c0	H+[c0] + NADH[c0] + 15-methyl-trans-hexa-dec-2-enoyl-ACP[c0] => NAD[c0] + 15-methyl-hexa-decanoyl-ACP[c0]
	rxn05431_c0	14-methyl-3-hydroxy-pentadecanoyl-ACP hydro-lyase_c0	14-methyl-3-hydroxy-pentadecanoyl-ACP[c0] <=> 14-methyl-trans-pentadec-2-enoyl-ACP[c0] + H2O[c0]
	rxn00537_c0	2-Phosphonoacetaldehyde phosphonohydrolase_c0	H2O[c0] + Phosphonoacetaldehyde[c0] => Phosphate[c0] + Acetaldehyde[c0]
	rxn00650_c0	membrane alanyl aminopeptidase_c0	H2O[c0] + Cys-Gly[c0] <=> L-Cysteine[c0] + Glycine[c0]
	rxn01241_c0	Dihydrolipoamide:NAD+ oxidoreductase_c0	Dihydrolipoamide[c0] + NAD[c0] <=> Lipoamide[c0] + H+[c0] + NADH[c0]
	rxn10229_c0	isopentadecanoyl-CDPdiacylglycerol-serine O-phosphatidyltransferase_c0	L-Serine[c0] + CDP-1,2-diisopentadecanoylglycerol[c0] => H+[c0] + Diisopentadecanoylphosphatidylserine[c0] + CMP[c0]
	rxn01522_c0	xanthine:NAD+ oxidoreductase_c0	XAN[c0] + H2O[c0] + NAD[c0] => H+[c0] + Urate[c0] + NADH[c0]
	rxn01117_c0	D-Arabinose-5-phosphate ketol-isomerase_c0	D-Arabinose5-phosphate[c0] <=> D-Ribulose5-phosphate[c0]
	rxn08300_c0	diacylglycerol kinase (n-C18:1)_c0	ATP[c0] + 1,2-Diacyl-sn-glycerol dioctadec-11-enoyl[c0] <=> 1,2-dioctadec-11-enoyl-sn-glycerol 3-phosphate[c0] + ADP[c0]
	rxn00836_c0	IMP:pyrophosphate phosphoribosyltransferase_c0	IMP[c0] + PPi[c0] <= HYXN[c0] + PRPP[c0]
	rxn00776_c0	Uracil hydro-lyase (adding D-ribose 5-phosphate)_c0	Uracil[c0] + ribose-5-phosphate[c0] => H2O[c0] + Pseudouridine 5'-phosphate[c0]
	rxn09110_c0	Phosphatidylglycerol synthase (n-C14:1)_c0	Glycerol-3-phosphate[c0] + CDP-1,2-ditetradec-7-enoylglycerol[c0] <=> Phosphatidylglycerophosphate ditetradec-7-enoyl[c0] + CMP[c0]
	rxn12646_c0	aminopeptidase_c0	H2O[c0] + Gly-Gln[c0] <=> L-Glutamine[c0] + Glycine[c0]
	rxn09296_c0	hydrogen peroxide reductase (thioredoxin)_c0	trdrd[c0] + H2O2[c0] => trdox[c0] + (2)H2O[c0]
	rxn01255_c0	5-O-(1-Carboxyvinyl)-3-phosphoshikimate phosphate-lyase_c0	5-O--1-Carboxyvinyl-3-phosphoshikimate[c0] => H+[c0] + Phosphate[c0] + Chorismate[c0]
	rxn03194_c0	(S)-2-Aceto-2-hydroxybutanoate pyruvate-lyase (carboxylating)_c0	2-Hydroxyethyl-ThPP[c0] + 2-Oxobutyrate[c0] <=> 2-Aceto-2-hydroxybutanoate[c0] + TPP[c0]
	rxn01360_c0	(S)-Dihydroorotate:oxygen oxidoreductase_c0	S-Dihydroorotate[c0] + O2[c0] => Orotate[c0] + H2O2[c0]
	rxn08552_c0	glycerol-3-phosphate acyltransferase (C18:1)_c0	Glycerol-3-phosphate[c0] + Octadecenoyl-ACP[c0] => ACP[c0] + 1-octadec-11-enoyl-sn-glycerol 3-phosphate[c0]
	rxn02927_c0	N2-succinyl-L-arginine iminohydrolase (decarboxylating)_c0	N2-Succinyl-L-arginine[c0] + (2)H+[c0] + (2)H2O[c0] => (2)NH3[c0] + CO2[c0] + N2-Succinyl-L-ornithine[c0]
	rxn03958_c0	1-Deoxy-D-xylulose-5-phosphate isomeroreductase_c0	NADP[c0] + 2-C-methyl-D-erythritol4-phosphate[c0] <=> H+[c0] + 1-deoxy-D-xylulose5-phosphate[c0] + NADPH[c0]
	rxn10267_c0	isotetradecanoyl-Phosphatidylglycerophosphate phosphohydrolase_c0	H2O[c0] + Diisotetradecanoylphosphatidylglycerophosphate[c0] => H+[c0] + Phosphate[c0] + Diisotetradecanoylphosphatidylglycerol[c0]
	rxn05433_c0	4-methyl-trans-hex-2-enoyl-ACP:NAD+ oxidoreductase (A-specific)_c0	H+[c0] + 4-methyl-trans-hex-2-enoyl-ACP[c0] + NADH[c0] => NAD[c0] + 4-methyl-hexanoyl-ACP[c0]
	rxn05373_c0	10-methyl-3-hydroxy-dodecanoyl-ACP hydro-lyase_c0	10-methyl-3-hydroxy-dodecanoyl-ACP[c0] <=> H2O[c0] + 10-methyl-trans-dodec-2-enoyl-ACP[c0]
	rxn10236_c0	anteisopentadecanoyl-phosphatidylserine decarboxylase_c0	(2)H+[c0] + Dianteisopentadecanoylphosphatidylserine[c0] <=> Dianteisopentadecanoylphosphatidylethanolamine[c0] + CO2[c0]
	rxn05465_c0	malonyl-ACP:[acyl-carrier-protein] transferase_c0	ACP[c0] + Malonyl-CoA[c0] <=> Malonyl-acyl-carrierprotein-[c0] + CoA[c0]
	rxn05452_c0	14-methyl-hexa-decanoyl-ACP:[acyl-carrier-protein] transferase_c0	14-methyl-hexa-decanoyl-ACP[c0] + CoA[c0] <=> fa12coa[c0] + ACP[c0]
	rxn10222_c0	isotetradecanoyl-phosphatidate cytidylyltransferase_c0	1,2-diisotetradecanoyl-sn-glycerol 3-phosphate[c0] + CTP[c0] <=> CDP-1,2-diisotetradecanoylglycerol[c0] + PPi[c0]
	rxn00392_c0	ATP:riboflavin 5'-phosphotransferase_c0	ATP[c0] + Riboflavin[c0] <=> FMN[c0] + ADP[c0]
	rxn02400_c0	Nicotinate D-ribonucleotide phosphohydrolase_c0	H2O[c0] + Nicotinate ribonucleotide[c0] => Nicotinate D-ribonucleoside[c0] + H+[c0] + Phosphate[c0]
	rxn01280_c0	(R)-Glycerate:NAD+ oxidoreductase_c0	NAD[c0] + Glycerate[c0] <=> Tartronate semialdehyde[c0] + H+[c0] + NADH[c0]
	rxn00758_c0	sn-Glycero-3-phosphocholine glycerophosphohydrolase_c0	Glycerophosphocholine[c0] + H2O[c0] => Glycerol-3-phosphate[c0] + Choline[c0]
	rxn01729_c0	glutarate-semialdehyde:NAD+ oxidoreductase_c0	H2O[c0] + NAD[c0] + 5-Oxopentanoate[c0] => (2)H+[c0] + Glutarate[c0] + NADH[c0]
	rxn01670_c0	Nicotinamide ribonucleotide phosphohydrolase_c0	Nicotinamide ribonucleotide[c0] + H2O[c0] => H+[c0] + Phosphate[c0] + N-Ribosylnicotinamide[c0]
	rxn05336_c0	(3R)-3-Hydroxypalmitoyl-[acyl-carrier-protein]:NADP+ oxidoreductase_c0	R-3-hydroxypalmitoyl-acyl-carrierprotein-[c0] + NADP[c0] <=> 3-oxohexadecanoyl-acp[c0] + H+[c0] + NADPH[c0]
	rxn02287_c0	S-Adenosyl-L-methionine:uroporphyrin-III C-methyltransferase_c0	UroporphyrinogenIII[c0] + (2)S-Adenosyl-L-methionine[c0] <=> (2)H+[c0] + (2)S-Adenosyl-homocysteine[c0] + Precorrin 2[c0]
	rxn02475_c0	2,5-Diamino-6-hydroxy-4-(5-phosphoribosylamino)-pyrimidine_c0	2,5-Diamino-6-(5'-phosphoribosylamino)-4-pyrimidineone[c0] + H+[c0] + H2O[c0] => 5-Amino-6--5-phosphoribosylaminouracil[c0] + NH3[c0]
	rxn08295_c0	diacylglycerol kinase (n-C14:0)_c0	ATP[c0] + 1,2-Diacyl-sn-glycerol ditetradecanoyl[c0] <=> 1,2-ditetradecanoyl-sn-glycerol 3-phosphate[c0] + ADP[c0]
	rxn00147_c0	ATP:pyruvate,water phosphotransferase_c0	ATP[c0] + Pyruvate[c0] + H2O[c0] => H+[c0] + AMP[c0] + Phosphate[c0] + Phosphoenolpyruvate[c0]
	rxn05312_c0	PIt6_c0	H+[e0] + Phosphate[e0] <= H+[c0] + Phosphate[c0]
	rxn02774_c0	S-Adenosyl-L-methionine:uroporphyrin-III C-methyltransferase_c0	NAD[c0] + Precorrin 2[c0] <=> H+[c0] + NADH[c0] + Sirohydrochlorin[c0]
	rxn05325_c0	Octanoyl-[acyl-carrier protein]:malonyl-CoA_c0	Octanoyl-ACP[c0] + NAD[c0] <= (2E)-Octenoyl-[acp][c0] + H+[c0] + NADH[c0]
	rxn05172_c0	Taurine-ABC transport_c0	Taurine[e0] + ATP[c0] + H2O[c0] => H+[c0] + Taurine[c0] + Phosphate[c0] + ADP[c0]
	rxn03057_c0	5-Methylthio-5-deoxy-D-ribose-1-phosphate ketol-isomerase_c0	methylthioribose-1-phosphate[c0] <=> methylthioribulose-1-phosphate[c0]
	rxn00646_c0	L-Glutamate:L-cysteine gamma-ligase (ADP-forming)_c0	ATP[c0] + L-Cysteine[c0] + L-Glutamate[c0] => H+[c0] + gamma-Glutamylcysteine[c0] + Phosphate[c0] + ADP[c0]
	rxn08708_c0	LPS heptose kinase I (LPS core synthesis)_c0	ATP[c0] + heptosyl-heptosyl-kdo2-lipidA[c0] <=> ADP[c0] + phospho-heptosyl-heptosyl-kdo2-lipidA[c0]
	rxn09240_c0	Sulfate adenyltransferase_c0	ATP[c0] + Sulfate[c0] + H2O[c0] + GTP[c0] <=> APS[c0] + Phosphate[c0] + PPi[c0] + GDP[c0]
	rxn00471_c0	L-Ornithine ammonia-lyase(cyclizing)_c0	Ornithine[c0] => H+[c0] + NH3[c0] + L-Proline[c0]
	rxn03408_c0	UDP-N-acetylglucosamine-N-acetylmuramyl-(pentapeptide)pyrophosphoryl-undecaprenol N-acetylglucosamine transferase_c0	Undecaprenyl-diphospho-N-acetylmuramoyl-L-alanyl-D-glutamyl-meso-2-6-diaminopimeloyl-D-alanyl-D-alanine[c0] + UDP-N-acetylglucosamine[c0] <=> UDP[c0] + Undecaprenyl-diphospho-N-acetylmuramoyl--N-acetylglucosamine-L-ala-D-glu-meso-2-6-diaminopimeloyl-D-ala-D-ala[c0]
	rxn09203_c0	Phosphatidylserine decarboxylase (n-C18:1)_c0	phosphatidylserine dioctadec-11-enoyl[c0] + (2)H+[c0] <=> CO2[c0] + phosphatidylethanolamine dioctadec-11-enoyl[c0]
	rxn05156_c0	L-Ornithine-ABC transport_c0	ATP[c0] + H2O[c0] + Ornithine[e0] => H+[c0] + Phosphate[c0] + Ornithine[c0] + ADP[c0]
	rxn00441_c0	2-Oxoglutarate:Thiamin diphosphate 2-oxidoreductase(decarboxylating_c0	H+[c0] + 2-Oxoglutarate[c0] + TPP[c0] => 3-Carboxy-1-hydroxypropyl-ThPP[c0] + CO2[c0]
	rxn01485_c0	D-Glucosamine 1-phosphate 1,6-phosphomutase_c0	D-Glucosamine1-phosphate[c0] <=> D-Glucosamine phosphate[c0]
	rxn13784_c0	RNA transcription_c0	=> RNA transcription[c0]
	rxn10184_c0	D-sorbitol transport via PEP:Pyr PTS_c0	Phosphoenolpyruvate[c0] + Sorbitol[e0] <=> Pyruvate[c0] + Sorbitol 6-phosphate[c0]
	rxn01987_c0	Deoxyribokinase_c0	deoxyribose-5-phosphate[c0] + ADP[c0] <=> ATP[c0] + Thyminose[c0]
	rxn05540_c0	Dipeptide transport via ABC system (ala-gln)_c0	ATP[c0] + H2O[c0] + Ala-Gln[e0] => H+[c0] + Phosphate[c0] + ADP[c0] + Ala-Gln[c0]
	rxn00363_c0	Cytidine-5'-monophosphate phosphohydrolase_c0	H2O[c0] + CMP[c0] => Cytidine[c0] + H+[c0] + Phosphate[c0]
	rxn04704_c0	coproporphyrinogen-III:S-adenosyl-L-methionine_c0	CoproporphyrinogenIII[c0] + (2)S-Adenosyl-L-methionine[c0] <=> (2)5'-Deoxyadenosine[c0] + (2)L-Methionine[c0] + (2)CO2[c0] + ProtoporphyrinogenIX[c0]
	rxn01629_c0	(S)-4-Amino-5-oxopentanoate 4,5-aminomutase_c0	5-Aminolevulinate[c0] <=> L-Glutamate1-semialdehyde[c0]
	rxn10204_c0	stearoyl-glycerol-3-phosphate O-acyltransferase_c0	Glycerol-3-phosphate[c0] + strcoa[c0] => 1-octadecanoyl-sn-glycerol 3-phosphate[c0] + CoA[c0]
	rxn05179_c0	L-Isoleucine-ABC transport_c0	ATP[c0] + H2O[c0] + L-Isoleucine[e0] => H+[c0] + Phosphate[c0] + ADP[c0] + L-Isoleucine[c0]
	rxn05669_c0	L-valine transport in via proton symport_c0	H+[e0] + L-Valine[e0] <=> H+[c0] + L-Valine[c0]
	rxn08086_c0	1-hexadecanoyl-sn-glycerol 3-phosphate O-acyltransferase (n-C16:0)_c0	1-hexadecanoyl-sn-glycerol 3-phosphate[c0] + Palmitoyl-ACP[c0] => ACP[c0] + 1,2-dihexadecanoyl-sn-glycerol 3-phosphate[c0]
	rxn05151_c0	L-Lysine-ABC transport_c0	ATP[c0] + H2O[c0] + L-Lysine[e0] => H+[c0] + Phosphate[c0] + L-Lysine[c0] + ADP[c0]
	rxn08129_c0	Amylomaltase (maltohexaose)_c0	Maltose[c0] + Maltohexaose[c0] <=> D-Glucose[c0] + Maltoheptaose[c0]
	rxn01548_c0	guanosine:orthophosphate ribosyltransferase_c0	H+[c0] + Phosphate[c0] + Guanosine[c0] <=> Ribose 1-phosphate[c0] + Guanine[c0]
	rxn05449_c0	12-methyl-trans-tridec-2-enoyl-ACP:NAD+ oxidoreductase (A-specific)_c0	H+[c0] + NADH[c0] + 12-methyl-trans-tridec-2-enoyl-ACP[c0] => 12-methyl-tridecanoyl-ACP[c0] + NAD[c0]
	rxn05377_c0	12-methyl-3-hydroxy-tetra-decanoyl-ACP hydro-lyase_c0	12-methyl-3-hydroxy-tetra-decanoyl-ACP[c0] <=> H2O[c0] + 12-methyl-trans-tetra-dec-2-enoyl-ACP[c0]
	rxn05459_c0	stearyl-ACP:[acyl-carrier-protein] transferase_c0	Octodecanoyl-ACP[c0] + CoA[c0] <=> ACP[c0] + strcoa[c0]
	rxn05313_c0	PIt8_c0	(3)Na+[e0] + Phosphate[e0] <=> (3)Na+[c0] + Phosphate[c0]
	rxn00966_c0	chorismate pyruvate-lyase (4-hydroxybenzoate-forming)_c0	4-Hydroxybenzoate[c0] + Pyruvate[c0] <= Chorismate[c0]
	rxn01451_c0	(S)-3-Hydroxybutanoyl-CoA:NAD+ oxidoreductase_c0	(S)-3-Hydroxybutyryl-CoA[c0] + NAD[c0] <=> H+[c0] + NADH[c0] + Acetoacetyl-CoA[c0]
	rxn00785_c0	D-Fructose 6-phosphate:D-glyceraldehyde-3-phosphate glycolaldehyde_c0	Glyceraldehyde3-phosphate[c0] + D-fructose-6-phosphate[c0] <=> D-Erythrose4-phosphate[c0] + D-Xylulose5-phosphate[c0]
	rxn05092_c0	1,2-dihydroxy-5-(methylthio)pent-1-en-3-one:oxygen oxidoreductase_c0	1,2-dihydroxy-3-keto-5-methylthiopentene[c0] + O2[c0] => H+[c0] + 4-methylthio 2-oxobutyrate[c0] + Formate[c0]
	rxn08127_c0	Amylomaltase (maltotetraose)_c0	Maltose[c0] + Maltotetraose[c0] <=> D-Glucose[c0] + Maltopentaose[c0]
	rxn08842_c0	Lysophospholipase L2 (2-acylglycerophosphoethanolamine, n-C16:1)_c0	2-Acyl-sn-glycero-3-phosphoethanolamine hexadec-9-enoyl[c0] + H2O[c0] <=> H+[c0] + hexadecenoate[c0] + Glycerophosphoethanolamine[c0]
	rxn05323_c0	Tetradecanoyl-[acyl-carrier protein]:malonyl-CoA_c0	NAD[c0] + Myristoyl-ACP[c0] <= H+[c0] + (2E)-Tetradecenoyl-[acp][c0] + NADH[c0]
	rxn03084_c0	5'-Phosphoribosylformylglycinamide:L-glutamine amido-ligase_c0	ATP[c0] + H2O[c0] + L-Glutamine[c0] + N-Formyl-GAR[c0] => H+[c0] + 5'-Phosphoribosylformylglycinamidine[c0] + Phosphate[c0] + L-Glutamate[c0] + ADP[c0]
	rxn03887_c0	D-galactarate hydro-lyase_c0	D-Mucic acid[c0] => H2O[c0] + 5-Dehydro-4-deoxy-D-glucarate[c0]
	rxn00011_c0	pyruvate:thiamin diphosphate acetaldehydetransferase_c0	2-Hydroxyethyl-ThPP[c0] + CO2[c0] <= H+[c0] + Pyruvate[c0] + TPP[c0]
	rxn05252_c0	FACOAL170(ISO)_c0	H+[c0] + ATP[c0] + CoA[c0] + fa11[c0] => AMP[c0] + fa11coa[c0] + PPi[c0]
	rxn00196_c0	2,5-dioxopentanoate:NADP+ 5-oxidoreductase_c0	2,5-Dioxopentanoate[c0] + NADP[c0] + H2O[c0] => (2)H+[c0] + 2-Oxoglutarate[c0] + NADPH[c0]
	rxn05466_c0	Ammonia transport via diffusion_c0	NH3[e0] <=> NH3[c0]
	rxn05398_c0	11-methyl-3-hydroxy-dodecanoyl-ACP hydro-lyase_c0	11-methyl-3-hydroxy-dodecanoyl-ACP[c0] <=> H2O[c0] + 11-methyl-trans-dodec-2-enoyl-ACP[c0]
	rxn08707_c0	Heme O synthase_c0	Heme[c0] + H2O[c0] + Farnesyldiphosphate[c0] <=> PPi[c0] + hemeO[c0]
	rxn00927_c0	Adenosine ribohydrolase_c0	H2O[c0] + Adenosine[c0] <=> D-Ribose[c0] + Adenine[c0]
	rxn02173_c0	D-Galactonate hydro-lyase_c0	D-Galactonate[c0] => H2O[c0] + 2-Dehydro-3-deoxy-D-galactonate[c0]
	rxn10161_c0	Octadecanoate transport via proton symport_c0	ocdca[e0] + H+[e0] <=> ocdca[c0] + H+[c0]
	rxn00708_c0	Uridine 5'-monophosphate phosphohydrolase_c0	UMP[c0] + H2O[c0] => Uridine[c0] + H+[c0] + Phosphate[c0]
	rxn01513_c0	ATP:dTMP phosphotransferase_c0	ATP[c0] + dTMP[c0] <=> dTDP[c0] + ADP[c0]
	rxn02476_c0	Phosphoenolpyruvate:3-phosphoshikimate_c0	3-phosphoshikimate[c0] + Phosphoenolpyruvate[c0] <=> 5-O--1-Carboxyvinyl-3-phosphoshikimate[c0] + H+[c0] + Phosphate[c0]
	rxn05333_c0	(3R)-3-Hydroxybutanoyl-[acyl-carrier-protein] hydro-lyase_c0	(R)-3-Hydroxydecanoyl-[acyl-carrier protein][c0] <=> (2E)-Decenoyl-[acp][c0] + H2O[c0]
	rxn01870_c0	D-Fructose 1-phosphate D-glyceraldehyde-3-phosphate-lyase_c0	D-fructose-1-phosphate[c0] <=> D-Glyceraldehyde[c0] + Glycerone-phosphate[c0]
	rxn04954_c0	5-methyltetrahydrofolate:NAD+ oxidoreductase_c0	5-Methyltetrahydrofolate[c0] + NAD[c0] <=> H+[c0] + NADH[c0] + 5-10-Methylenetetrahydrofolate[c0]
	rxn01575_c0	L-Isoleucine:2-oxoglutarate aminotransferase_c0	2-Oxoglutarate[c0] + L-Isoleucine[c0] <=> 3MOP[c0] + L-Glutamate[c0]
	rxn09206_c0	Phosphatidylserine syntase (n-C14:0)_c0	CDP-1,2-ditetradecanoylglycerol[c0] + L-Serine[c0] => phosphatidylserine ditetradecanoyl[c0] + H+[c0] + CMP[c0]
	rxn02342_c0	2-(alpha-Hydroxyethyl)thiamine diphosphate:lipoamide_c0	Lipoamide[c0] + 2-Hydroxyethyl-ThPP[c0] <=> S-Acetyldihydrolipoamide[c0] + TPP[c0]
	rxn00781_c0	D-Glyceraldehyde-3-phosphate:NAD+ oxidoreductase(phosphorylating)_c0	Glyceraldehyde3-phosphate[c0] + Phosphate[c0] + NAD[c0] <=> NADH[c0] + 1,3-Bisphospho-D-glycerate[c0]
	rxn00973_c0	citrate hydro-lyase_c0	Citrate[c0] <=> Isocitrate[c0]
	rxn05181_c0	Betaine-ABC transport_c0	ATP[c0] + BET[e0] + H2O[c0] => H+[c0] + BET[c0] + Phosphate[c0] + ADP[c0]
	rxn01985_c0	Deoxyinosine:orthophosphate ribosyltransferase_c0	H+[c0] + Deoxyinosine[c0] + Phosphate[c0] <=> HYXN[c0] + deoxyribose-1-phosphate[c0]
	rxn00775_c0	ADPribose ribophosphohydrolase_c0	H2O[c0] + ADPribose[c0] => AMP[c0] + ribose-5-phosphate[c0]
	rxn00364_c0	ATP:CMP phosphotransferase_c0	ATP[c0] + CMP[c0] <=> CDP[c0] + ADP[c0]
	rxn00515_c0	ATP:nucleoside-diphosphate phosphatransferase_c0	ATP[c0] + IDP[c0] <=> ITP[c0] + ADP[c0]
	rxn01025_c0	5-Methylcytosine aminohydrolase_c0	H+[c0] + 5-Methylcytosine[c0] + H2O[c0] => Thymine[c0] + NH3[c0]
	rxn02011_c0	UDP-N-acetylmuramoyl-L-alanyl-D-glutamate:meso-2,6-_c0	ATP[c0] + UDP-N-acetylmuramoyl-L-alanyl-D-glutamate[c0] + meso-2,6-Diaminopimelate[c0] => H+[c0] + Phosphate[c0] + UDP-N-acetylmuramoyl-L-alanyl-D-gamma-glutamyl-meso-2-6-diaminopimelate[c0] + ADP[c0]
	rxn02186_c0	2,3-Dihydroxy-3-methylbutanoate:NADP+ oxidoreductase (isomerizing)_c0	H+[c0] + ALCTT[c0] + NADPH[c0] <=> NADP[c0] + 2,3-Dihydroxy-isovalerate[c0]
	rxn10227_c0	anteisoheptadecanoyl-CDPdiacylglycerol-serine O-phosphatidyltransferase_c0	CDP-1,2-dianteisoheptadecanoylglycerol[c0] + L-Serine[c0] => Dianteisoheptadecanoylphosphatidylserine[c0] + H+[c0] + CMP[c0]
	rxn09113_c0	Phosphatidylglycerol synthase (n-C18:0)_c0	CDP-1,2-dioctadecanoylglycerol[c0] + Glycerol-3-phosphate[c0] <=> Phosphatidylglycerophosphate dioctadecanoyl[c0] + CMP[c0]
	rxn03536_c0	Adenosyl cobinamide kinase_c0	ATP[c0] + Adenosyl cobinamide[c0] <=> H+[c0] + Adenosyl cobinamide phosphate[c0] + ADP[c0]
	rxn12846_c0	Gly-Phe aminopeptidase_c0	Gly-Phe[c0] + H2O[c0] <=> L-Phenylalanine[c0] + Glycine[c0]
	rxn01218_c0	2'-Deoxycytidine 5'-monophosphate phosphohydrolase_c0	dCMP[c0] + H2O[c0] => H+[c0] + Phosphate[c0] + Deoxycytidine[c0]
	rxn05161_c0	L-Leucine-ABC transport_c0	ATP[c0] + H2O[c0] + L-Leucine[e0] => H+[c0] + Phosphate[c0] + ADP[c0] + L-Leucine[c0]
	rxn01297_c0	Xanthine:NAD+ oxidoreductase_c0	HYXN[c0] + H2O[c0] + NAD[c0] <=> H+[c0] + XAN[c0] + NADH[c0]
	rxn05239_c0	adenosine 3',5'-bisphosphate,sulfite:oxidized-thioredoxin oxidoreductase_c0	3-phosphoadenylylsulfate[c0] + trdrd[c0] => trdox[c0] + Adenosine 3-5-bisphosphate[c0] + Sulfite[c0]
	rxn08547_c0	glycerol-3-phosphate acyltransferase (C14:0)_c0	Glycerol-3-phosphate[c0] + Myristoyl-ACP[c0] => 1-tetradecanoyl-sn-glycerol 3-phosphate[c0] + ACP[c0]
	rxn05201_c0	Hypoxanthine ion-coupled transport_c0	HYXN[e0] + H+[e0] <=> HYXN[c0] + H+[c0]
	rxn10233_c0	anteisoheptadecanoyl-phosphatidylserine decarboxylase_c0	Dianteisoheptadecanoylphosphatidylserine[c0] + (2)H+[c0] <=> Dianteisoheptadecanoylphosphatidylethanolamine[c0] + CO2[c0]
	rxn08976_c0	NADH dehydrogenase (demethylmenaquinone-8 & 0 protons)_c0	H+[c0] + NADH[c0] + 2-Demethylmenaquinone 8[c0] => NAD[c0] + 2-Demethylmenaquinol 8[c0]
	rxn02789_c0	2-Isopropylmalate hydro-lyase_c0	2-Isopropylmalate[c0] <=> 2-Isopropylmaleate[c0] + H2O[c0]
	rxn05383_c0	3-methylbutanoyl-CoA:[acyl-carrier-protein] transferase_c0	ACP[c0] + Isovaleryl-CoA[c0] <=> isovaleryl-ACP[c0] + CoA[c0]
	rxn08180_c0	Biotin synthase_c0	Dethiobiotin[c0] + S-Adenosyl-L-methionine[c0] + S[c0] => 5'-Deoxyadenosine[c0] + H+[c0] + L-Methionine[c0] + BIOT[c0]
	rxn01331_c0	D-erythrose 4-phosphate:NAD+ oxidoreductase_c0	D-Erythrose4-phosphate[c0] + H2O[c0] + NAD[c0] => (2)H+[c0] + NADH[c0] + 4-Phosphoerythronate[c0]
	rxn10042_c0	ATP synthase (four protons for one ATP)_c0	(4)H+[e0] + Phosphate[c0] + ADP[c0] <=> ATP[c0] + (3)H+[c0] + H2O[c0]
	rxn00800_c0	N6-(1,2-Dicarboxyethyl)AMP AMP-lyase_c0	Adenylosuccinate[c0] <=> AMP[c0] + Fumarate[c0]
	rxn01520_c0	5,10-Methylenetetrahydrofolate:dUMP C-methyltransferase_c0	dUMP[c0] + 5-10-Methylenetetrahydrofolate[c0] => Dihydrofolate[c0] + dTMP[c0]
	rxn08783_c0	D-lactate dehydrogenase_c0	Ubiquinone-8[c0] + D-Lactate[c0] => Ubiquinol-8[c0] + Pyruvate[c0]
	rxn00322_c0	L-Lysine carboxy-lyase_c0	H+[c0] + L-Lysine[c0] => CO2[c0] + Cadaverine[c0]
	rxn05441_c0	9-methyl-trans-dec-2-enoyl-ACP:NAD+ oxidoreductase (A-specific)_c0	H+[c0] + NADH[c0] + 9-methyl-trans-dec-2-enoyl-ACP[c0] => 9-methyl-decanoyl-ACP[c0] + NAD[c0]
	rxn10342_c0	isohexadecanoyl-cardiolipin synthase_c0	(2)Diisohexadecanoylphosphatidylglycerol[c0] <=> Isohexadecanoylcardiolipin (B. subtilis)[c0] + Glycerol[c0]
	rxn05426_c0	12-methyl-3-oxo-tridecanoyl-ACP:NADP+ oxidoreductase_c0	12-methyl-3-oxo-tridecanoyl-ACP[c0] + H+[c0] + NADPH[c0] <=> NADP[c0] + 12-methyl-3-hydroxy-tridecanoyl-ACP[c0]
	rxn08818_c0	Lysophospholipase L2 (2-acylglycerophosphotidate, n-C14:0)_c0	2-tetradecanoyl-sn-glycerol 3-phosphate[c0] + H2O[c0] <=> H+[c0] + Glycerol-3-phosphate[c0] + Myristic acid[c0]
	rxn02314_c0	ATP:D-tagatose-6-phosphate 1-phosphotransferase_c0	ATP[c0] + D-Tagatose 6-phosphate[c0] <=> ADP[c0] + D-Tagatose 1,6-biphosphate[c0]
	rxn05307_c0	SERt2_c0	H+[e0] + L-Serine[e0] <=> H+[c0] + L-Serine[c0]
	rxn05126_c0	rxn05126_c0	H2O[c0] + NAD[c0] + gamma-glutamyl-gamma-butyraldehyde[c0] => (2)H+[c0] + NADH[c0] + gamma-Glutamyl-GABA[c0]
	rxn03991_c0	nitric oxide, NADPH2:oxygen oxidoreductase_c0	(2)NO[c0] + (2)O2[c0] + NADPH[c0] <=> H+[c0] + NADP[c0] + (2)Nitrate[c0]
	rxn01465_c0	(S)-Dihydroorotate amidohydrolase_c0	H2O[c0] + S-Dihydroorotate[c0] <=> H+[c0] + N-Carbamoyl-L-aspartate[c0]
	rxn05364_c0	6-methyl-3-oxo-octanoyl-ACP:NADP+ oxidoreductase_c0	H+[c0] + 6-methyl-3-oxo-octanoyl-ACP[c0] + NADPH[c0] <=> 6-methyl-3-hydroxy-octanoyl-ACP[c0] + NADP[c0]
	rxn00863_c0	L-Histidinal:NAD+ oxidoreductase_c0	L-Histidinal[c0] + H2O[c0] + NAD[c0] => (2)H+[c0] + L-Histidine[c0] + NADH[c0]
	rxn01299_c0	Inosine ribohydrolase_c0	Inosine[c0] + H2O[c0] <=> HYXN[c0] + D-Ribose[c0]
	rxn00209_c0	Pyridoxine 5-phosphate:oxygen oxidoreductase (deaminating)_c0	O2[c0] + Pyridoxine phosphate[c0] => Pyridoxal phosphate[c0] + H2O2[c0]
	rxn03150_c0	alpha-ribazole 5-phosphate phosphatase_c0	H2O[c0] + alpha-Ribazole 5'-phosphate[c0] => H+[c0] + alpha-Ribazole[c0] + Phosphate[c0]
	rxn10217_c0	isopentadecanoyl-1-acylglycerol-3-phosphate O-acyltransferase_c0	1-isopentadecanoyl-sn-glycerol 3-phosphate[c0] + fa3coa[c0] => 1,2-diisopentadecanoyl-sn-glycerol 3-phosphate[c0] + CoA[c0]
	rxn09449_c0	fatty-acid--CoA ligase (octadecanoate)_c0	ocdca[c0] + H+[c0] + ATP[c0] + CoA[c0] => AMP[c0] + PPi[c0] + strcoa[c0]
	rxn02167_c0	(S)-3-Hydroxybutanoyl-CoA hydro-lyase_c0	(S)-3-Hydroxybutyryl-CoA[c0] <=> Crotonyl-CoA[c0] + H2O[c0]
	rxn10168_c0	Potassium ABC transporter_c0	ATP[c0] + H2O[c0] + K+[e0] => H+[c0] + Phosphate[c0] + ADP[c0] + K+[c0]
	rxn05419_c0	8-methyl-3-hydroxy-nonanoyl-ACP hydro-lyase_c0	8-methyl-3-hydroxy-nonanoyl-ACP[c0] <=> 8-methyl-trans-non-2-enoyl-ACP[c0] + H2O[c0]
	rxn01504_c0	(S)-3-Hydroxy-3-methylglutaryl-CoA hydro-lyase_c0	HMG-CoA[c0] <=> 3-Methylglutaconyl-CoA[c0] + H2O[c0]
	rxn03436_c0	(S)-2-Aceto-2-hydroxybutanoate:NADP+ oxidoreductase (isomerizing)_c0	2-Aceto-2-hydroxybutanoate[c0] <=> (R)-3-Hydroxy-3-methyl-2-oxopentanoate[c0]
	rxn08756_c0	1-hydroxy-2-methyl-2-(E)-butenyl 4-diphosphate reductase (ipdp)_c0	H+[c0] + NADH[c0] + 1-Hydroxy-2-methyl-2-butenyl 4-diphosphate[c0] => Isopentenyldiphosphate[c0] + H2O[c0] + NAD[c0]
	rxn00423_c0	serine O-acetyltransferase_c0	L-Serine[c0] + Acetyl-CoA[c0] => CoA[c0] + O-Acetyl-L-serine[c0]
	rxn03975_c0	FMNH2:NADP+ oxidoreductase_c0	NADP[c0] + FMNH2[c0] <= H+[c0] + FMN[c0] + NADPH[c0]
	rxn05430_c0	14-methyl-3-oxo-pentadecanoyl-ACP:NADP+ oxidoreductase_c0	H+[c0] + 14-methyl-3-oxo-pentadecanoyl-ACP[c0] + NADPH[c0] <=> NADP[c0] + 14-methyl-3-hydroxy-pentadecanoyl-ACP[c0]
	rxn00615_c0	ATP:glycerol 3-phosphotransferase_c0	ATP[c0] + Glycerol[c0] <=> Glycerol-3-phosphate[c0] + ADP[c0]
	rxn08810_c0	Lysophospholipase L1 (2-acylglycerophosphoglycerol, n-C12:0) (periplasm)_c0	1-Acyl-sn-glycero-3-phosphoglycerol dodecanoyl[c0] + H2O[c0] <=> H+[c0] + ddca[c0] + Glycerophosphoglycerol[c0]
	rxn03248_c0	Hexanoyl-CoA:acetyl-CoA C-acyltransferase_c0	Hexanoyl-CoA[c0] + Acetyl-CoA[c0] <=> 3-Oxooctanoyl-CoA[c0] + CoA[c0]
	rxn08307_c0	CDP-diacylglycerol synthetase (n-C14:0)_c0	1,2-ditetradecanoyl-sn-glycerol 3-phosphate[c0] + CTP[c0] <=> CDP-1,2-ditetradecanoylglycerol[c0] + PPi[c0]
	rxn02201_c0	2-Amino-4-hydroxy-6-hydroxymethyl-7,8-dihydropteridine-_c0	7,8-Dihydropterin pyrophosphate[c0] + ABEE[c0] => Dihydropteroate[c0] + PPi[c0]
	rxn05555_c0	iron (II) transport via ABC system_c0	ATP[c0] + H2O[c0] + Fe2+[e0] => H+[c0] + Phosphate[c0] + Fe2+[c0] + ADP[c0]
	rxn05402_c0	13-methyl-3-hydroxy-tetra-decanoyl-ACP hydro-lyase_c0	13-methyl-3-hydroxy-tetra-decanoyl-ACP[c0] <=> H2O[c0] + 13-methyl-trans-tetra-dec-2-enoyl-ACP[c0]
	rxn00742_c0	L-Cystathionine Lysteine-lyase (deaminating)_c0	H2O[c0] + Cystathionine[c0] => L-Cysteine[c0] + NH3[c0] + 2-Oxobutyrate[c0]
	rxn02159_c0	L-Histidinol:NAD+ oxidoreductase_c0	L-Histidinol[c0] + NAD[c0] <=> L-Histidinal[c0] + H+[c0] + NADH[c0]
	rxn10067_c0	FMN-dependent monooxygenase (hexanesulfonate)_c0	FMNH2[c0] + hexanesulfonate[c0] + O2[c0] => hexanal[c0] + H2O[c0] + Sulfite[c0] + FMN[c0]
	rxn00727_c0	Chorismate pyruvate-lyase (amino-accepting)_c0	L-Glutamine[c0] + Chorismate[c0] => H+[c0] + Pyruvate[c0] + L-Glutamate[c0] + Anthranilate[c0]
	rxn03891_c0	trans-hexaprenyltranstransferase_c0	all-trans-Hexaprenyl diphosphate[c0] + Isopentenyldiphosphate[c0] => all-trans-Heptaprenyl diphosphate[c0] + PPi[c0]
	rxn06076_c0	2'-Deoxycytidine diphosphate:oxidized-thioredoxin 2'-oxidoreductase_c0	trdox[c0] + H2O[c0] + dCDP[c0] <= CDP[c0] + trdrd[c0]
	rxn05413_c0	4-methyl-pentanoyl-ACP:malonyl-[acyl-carrier-protein] C-acyltransferase (decarboxylating)_c0	H+[c0] + Malonyl-acyl-carrierprotein-[c0] + 4-methyl-pentanoyl-ACP[c0] => 6-methyl-3-oxo-heptanoyl-ACP[c0] + ACP[c0] + CO2[c0]
	rxn04385_c0	L-threonine-O-3-phosphate carboxy-lyase_c0	H+[c0] + L-Threonine phosphate[c0] => CO2[c0] + (R)-1-Aminopropan-2-yl phosphate[c0]
	rxn05348_c0	Decanoyl-[acyl-carrier protein]:malonyl-[acyl-carrier-protein]_c0	Decanoyl-ACP[c0] + H+[c0] + Malonyl-acyl-carrierprotein-[c0] => 3-oxododecanoyl-acp[c0] + ACP[c0] + CO2[c0]
	rxn02914_c0	3-Phosphoserine:2-oxoglutarate aminotransferase_c0	phosphoserine[c0] + 2-Oxoglutarate[c0] <=> 3-Phosphonooxypyruvate[c0] + L-Glutamate[c0]
	rxn01300_c0	ATP:L-homoserine O-phosphotransferase_c0	ATP[c0] + L-Homoserine[c0] <=> O-Phospho-L-homoserine[c0] + ADP[c0]
	rxn00175_c0	Acetate:CoA ligase (AMP-forming)_c0	H+[c0] + ATP[c0] + Acetate[c0] + CoA[c0] <=> AMP[c0] + PPi[c0] + Acetyl-CoA[c0]
	rxn10264_c0	isohexadecanoyl-CDPdiacylglycerol:sn-glycerol-3-phosphate 3-phosphatidyltransferase_c0	CDP-1,2-diisohexadecanoylglycerol[c0] + Glycerol-3-phosphate[c0] <=> Diisohexadecanoylphosphatidylglycerophosphate[c0] + CMP[c0]
	rxn10208_c0	isopentadecanoyl-glycerol-3-phosphate O-acyltransferase_c0	Glycerol-3-phosphate[c0] + fa3coa[c0] => 1-isopentadecanoyl-sn-glycerol 3-phosphate[c0] + CoA[c0]
	rxn05445_c0	4-methyl-trans-pent-2-enoyl-ACP:NAD+ oxidoreductase (A-specific)_c0	H+[c0] + NADH[c0] + 4-methyl-trans-pent-2-enoyl-ACP[c0] => NAD[c0] + 4-methyl-pentanoyl-ACP[c0]
	rxn01647_c0	Nicotinate D-ribonucleoside:orthophosphate ribosyltransferase_c0	Nicotinate D-ribonucleoside[c0] + Phosphate[c0] <=> Ribose 1-phosphate[c0] + Niacin[c0]
	rxn06979_c0	rxn06979_c0	(2)ATP[c0] + (2)H2O[c0] + (2)L-Glutamine[c0] + Cobyrinate[c0] <=> (2)H+[c0] + (2)Phosphate[c0] + Cob(II)yrinate diamide[c0] + (2)L-Glutamate[c0] + (2)ADP[c0]
	rxn12642_c0	aminopeptidase_c0	H2O[c0] + Ala-His[c0] <=> L-Histidine[c0] + L-Alanine[c0]
	rxn01192_c0	Protocatechuate:oxygen 3,4-oxidoreductase (decyclizing)_c0	Protocatechuate[c0] + O2[c0] => (2)H+[c0] + 3-Carboxy-cis,cis-muconate[c0]
	rxn00881_c0	myo-Inositol 1-phosphate phosphahydrolase_c0	Inositol 1-phosphate[c0] + H2O[c0] => L-Inositol[c0] + H+[c0] + Phosphate[c0]
	rxn05247_c0	FACOAL140(ISO)_c0	H+[c0] + ATP[c0] + fa1[c0] + CoA[c0] => AMP[c0] + PPi[c0] + fa1coa[c0]
	rxn00986_c0	Propanoate:CoA ligase (AMP-forming)_c0	H+[c0] + ATP[c0] + Propionate[c0] <= PPi[c0] + Propionyladenylate[c0]
	rxn00501_c0	3-Oxopropanoate:NAD+ oxidoreductase (decarboxylating,_c0	NAD[c0] + CoA[c0] + 3-Oxopropanoate[c0] <=> CO2[c0] + NADH[c0] + Acetyl-CoA[c0]
	rxn07588_c0	rxn07588_c0	Cobalt-precorrin 6B[c0] + S-Adenosyl-L-methionine[c0] <=> Cobalt-precorrin 7[c0] + H+[c0] + S-Adenosyl-homocysteine[c0]
	rxn07845_c0	D-glucarate hydro-lyase_c0	D-Glucarate[c0] => H2O[c0] + 2-Dehydro-3-deoxy-D-glucarate[c0]
	rxn05369_c0	8-methyl-3-hydroxy-decanoyl-ACP hydro-lyase_c0	8-methyl-3-hydroxy-decanoyl-ACP[c0] <=> 8-methyl-trans-dec-2-enoyl-ACP[c0] + H2O[c0]
	rxn05594_c0	Isethionate transport via ABC system_c0	ATP[c0] + Isethionate[e0] + H2O[c0] => H+[c0] + Isethionate[c0] + Phosphate[c0] + ADP[c0]
	rxn02504_c0	2-Amino-4-hydroxy-6-(D-erythro-1,2,3-trihydroxypropyl)-7,8-_c0	Dihydroneopterin[c0] <=> 6-hydroxymethyl dihydropterin[c0] + Glycolaldehyde[c0]
	rxn01672_c0	dCTP aminohydrolase_c0	H+[c0] + H2O[c0] + dCTP[c0] => dUTP[c0] + NH3[c0]
	rxn10473_c0	chlorideion transport out via diffusion_c0	Cl-[e0] <=> Cl-[c0]
	rxn08975_c0	NADH dehydrogenase (ubiquinone-8 )_c0	H+[c0] + Ubiquinone-8[c0] + NADH[c0] => Ubiquinol-8[c0] + NAD[c0]
	rxn01226_c0	Guanosine ribohydrolase_c0	H2O[c0] + Guanosine[c0] <=> Guanine[c0] + D-Ribose[c0]
	rxn01640_c0	N-Formimino-L-glutamate iminohydrolase_c0	N-Formimino-L-glutamate[c0] + H2O[c0] <=> NH3[c0] + N-Formyl-L-glutamate[c0]
	rxn00904_c0	L-Valine:pyruvate aminotransferase_c0	Pyruvate[c0] + L-Valine[c0] <=> 3-Methyl-2-oxobutanoate[c0] + L-Alanine[c0]
	rxn05534_c0	Dipeptide transport via ABC system (gly-glu)_c0	ATP[c0] + H2O[c0] + gly-glu-L[e0] => H+[c0] + Phosphate[c0] + gly-glu-L[c0] + ADP[c0]
	rxn03918_c0	D-glycero-D-manno-heptose 7-phosphate kinase_c0	ATP[c0] + D-Glycero-D-manno-heptose7-phosphate[c0] <=> D-Glycero-D-manno-heptose1-7-bisphosphate[c0] + ADP[c0]
	rxn08556_c0	glycerol-3-phosphate dehydrogenase (ubiquinone-8)_c0	Glycerol-3-phosphate[c0] + Ubiquinone-8[c0] => Ubiquinol-8[c0] + Glycerone-phosphate[c0]
	rxn00912_c0	5,10-Methylenetetrahydrofolate:3-methyl-2-oxobutanoate_c0	3-Methyl-2-oxobutanoate[c0] + H2O[c0] + 5-10-Methylenetetrahydrofolate[c0] <=> 2-Dehydropantoate[c0] + Tetrahydrofolate[c0]
	rxn05446_c0	6-methyl-trans-hept-2-enoyl-ACP:NAD+ oxidoreductase (A-specific)_c0	H+[c0] + 6-methyl-trans-hept-2-enoyl-ACP[c0] + NADH[c0] => NAD[c0] + 6-methyl-heptanoyl-ACP[c0]
	rxn05435_c0	8-methyl-trans-dec-2-enoyl-ACP:NAD+ oxidoreductase (A-specific)_c0	8-methyl-trans-dec-2-enoyl-ACP[c0] + H+[c0] + NADH[c0] => 8-methyl-decanoyl-ACP[c0] + NAD[c0]
	rxn01358_c0	inosine:orthophosphate ribosyltransferase_c0	Inosine[c0] + H+[c0] + Phosphate[c0] <=> Ribose 1-phosphate[c0] + HYXN[c0]
	rxn00692_c0	5,10-Methylenetetrahydrofolate:glycine hydroxymethyltransferase_c0	H2O[c0] + 5-10-Methylenetetrahydrofolate[c0] + Glycine[c0] <=> Tetrahydrofolate[c0] + L-Serine[c0]
	rxn09108_c0	Phosphatidylglycerol synthase (n-C12:0)_c0	Glycerol-3-phosphate[c0] + CDP-1,2-didodecanoylglycerol[c0] <=> Phosphatidylglycerophosphate didodecanoyl[c0] + CMP[c0]
	rxn03068_c0	(R)-2,3-Dihydroxy-3-methylbutanoate:NADP+ oxidoreductase_c0	NADP[c0] + 2,3-Dihydroxy-isovalerate[c0] <=> H+[c0] + 2-Oxo-3-hydroxyisovalerate[c0] + NADPH[c0]
	rxn00566_c0	L-Cysteine L-homocysteine-lyase (deaminating)_c0	L-Cysteine[c0] + H2O[c0] => Pyruvate[c0] + NH3[c0] + H2S[c0]
	rxn07431_c0	rxn07431_c0	2-Methyl-1-hydroxypropyl-TPP[c0] + Lipoamide[c0] <=> S-(2-Methylpropionyl)-dihydrolipoamide[c0] + TPP[c0]
	rxn08299_c0	diacylglycerol kinase (n-C18:0)_c0	ATP[c0] + 1,2-Diacyl-sn-glycerol dioctadecanoyl[c0] <=> 1,2-dioctadecanoyl-sn-glycerol 3-phosphate[c0] + ADP[c0]
	rxn00992_c0	(R)-3-Hydroxybutanoate:NAD+ oxidoreductase_c0	NAD[c0] + (R)-3-Hydroxybutanoate[c0] <=> H+[c0] + NADH[c0] + Acetoacetate[c0]
	rxn05361_c0	4-methyl-3-hydroxy-hexanoyl-ACP hydro-lyase_c0	4-methyl-3-hydroxy-hexanoyl-ACP[c0] <=> H2O[c0] + 4-methyl-trans-hex-2-enoyl-ACP[c0]
	rxn00002_c0	Urea-1-carboxylate amidohydrolase_c0	(3)H+[c0] + Allophanate[c0] + H2O[c0] => (2)NH3[c0] + (2)CO2[c0]
	rxn00654_c0	N-Carbamoyl-beta-alanine amidohydrolase_c0	(2)H+[c0] + H2O[c0] + 3-Ureidopropanoate[c0] => beta-Alanine[c0] + NH3[c0] + CO2[c0]
	rxn08971_c0	NADH dehydrogenase (menaquinone-8 & 0 protons)_c0	H+[c0] + NADH[c0] + Menaquinone 8[c0] => NAD[c0] + Menaquinol 8[c0]
	rxn01303_c0	Acetyl-CoA:L-homoserine O-acetyltransferase_c0	L-Homoserine[c0] + Acetyl-CoA[c0] => O-Acetyl-L-homoserine[c0] + CoA[c0]
	rxn12634_c0	aminopeptidase_c0	H2O[c0] + gly-glu-L[c0] <=> L-Glutamate[c0] + Glycine[c0]
	rxn05456_c0	14-methyl-pentadecanoyl-ACP:[acyl-carrier-protein] transferase_c0	14-methyl-pentadecanoyl-ACP[c0] + CoA[c0] <=> ACP[c0] + fa6coa[c0]
	rxn10261_c0	isotetradecanoyl-CDPdiacylglycerol:sn-glycerol-3-phosphate 3-phosphatidyltransferase_c0	Glycerol-3-phosphate[c0] + CDP-1,2-diisotetradecanoylglycerol[c0] <=> Diisotetradecanoylphosphatidylglycerophosphate[c0] + CMP[c0]
	rxn10232_c0	isoheptadecanoyl-phosphatidylserine decarboxylase_c0	(2)H+[c0] + Diisoheptadecanoylphosphatidylserine[c0] <=> Diisoheptadecanoylphosphatidylethanolamine[c0] + CO2[c0]
	rxn00300_c0	GTP 7,8-8,9-dihydrolase (pyrophosphate-forming)_c0	(3)H2O[c0] + GTP[c0] => 2,5-Diamino-6-(5'-phosphoribosylamino)-4-pyrimidineone[c0] + H+[c0] + PPi[c0] + Formate[c0]
	rxn02288_c0	Uroporphyrinogen-III carboxy-lyase_c0	UroporphyrinogenIII[c0] + (4)H+[c0] <=> CoproporphyrinogenIII[c0] + (4)CO2[c0]
	rxn00907_c0	5,10-methylenetetrahydrofolate:NADP+ oxidoreductase_c0	NADP[c0] + 5-10-Methylenetetrahydrofolate[c0] <=> 5-10-Methenyltetrahydrofolate[c0] + NADPH[c0]
	rxn05410_c0	4-methyl-3-oxo-pentanoyl-ACP:NADP+ oxidoreductase_c0	H+[c0] + 4-methyl-3-oxo-pentanoyl-ACP[c0] + NADPH[c0] <=> NADP[c0] + 4-methyl-3-hydroxy-pentanoyl-ACP[c0]
	rxn00509_c0	Succinate-semialdehyde:NADP+ oxidoreductase_c0	NADP[c0] + H2O[c0] + 4-Oxobutanoate[c0] => (2)H+[c0] + Succinate[c0] + NADPH[c0]
	rxn01269_c0	Prephenate:NADP+ oxidoreductase(decarboxylating)_c0	Prephenate[c0] + NADP[c0] => p-hydroxyphenylpyruvate[c0] + CO2[c0] + NADPH[c0]
	rxn04048_c0	cobalt-precorrin-4 methyltransferase_c0	Cobalt-precorrin 4[c0] + S-Adenosyl-L-methionine[c0] <=> S-Adenosyl-homocysteine[c0] + Cobalt-precorrin 5[c0]
	rxn00205_c0	Glutathione:hydrogen-peroxide oxidoreductase_c0	(2)GSH[c0] + H2O2[c0] => Oxidized glutathione[c0] + (2)H2O[c0]
	rxn06673_c0	Acetyl-CoA:carbon-dioxide ligase (ADP-forming)_c0	Carboxybiotin-carboxyl-carrier protein[c0] + Acetyl-CoA[c0] => Holo-[carboxylase][c0] + Malonyl-CoA[c0]
	rxn00790_c0	5-Phosphoribosylamine:pyrophosphate phosphoribosyltransferase_c0	5-Phosphoribosylamine[c0] + PPi[c0] + L-Glutamate[c0] <= H2O[c0] + L-Glutamine[c0] + PRPP[c0]
	rxn08296_c0	diacylglycerol kinase (n-C14:1)_c0	1,2-Diacyl-sn-glycerol ditetradec-7-enoyl[c0] + ATP[c0] <=> ADP[c0] + 1,2-ditetradec-7-enoyl-sn-glycerol 3-phosphate[c0]
	rxn05569_c0	D-glucosamine transport via PEP:Pyr PTS_c0	GLUM[e0] + Phosphoenolpyruvate[c0] <=> Pyruvate[c0] + D-Glucosamine phosphate[c0]
	rxn05574_c0	glucuronate transport in via proton symport_c0	H+[e0] + Glucuronate[e0] <=> H+[c0] + Glucuronate[c0]
	rxn08805_c0	Lysophospholipase L1 (2-acylglycerophosphoethanolamine, n-C14:1) (periplasm)_c0	H2O[c0] + 1-Acyl-sn-glycero-3-phosphoethanolamine tetradec-7-enoyl[c0] <=> H+[c0] + Glycerophosphoethanolamine[c0] + tetradecenoate[c0]
	rxn00006_c0	hydrogen-peroxide:hydrogen-peroxide oxidoreductase_c0	(2)H2O2[c0] => (2)H2O[c0] + O2[c0]
	rxn09202_c0	Phosphatidylserine decarboxylase (n-C18:0)_c0	(2)H+[c0] + phosphatidylserine dioctadecanoyl[c0] <=> phosphatidylethanolamine dioctadecanoyl[c0] + CO2[c0]
	rxn03239_c0	(S)-3-Hydroxyhexadecanoyl-CoA:NAD+ oxidoreductase_c0	NAD[c0] + (S)-3-Hydroxyhexadecanoyl-CoA[c0] <=> H+[c0] + 3-Oxopalmitoyl-CoA[c0] + NADH[c0]
	rxn05394_c0	9-methyl-3-hydroxy-decanoyl-ACP hydro-lyase_c0	9-methyl-3-hydroxy-decanoyl-ACP[c0] <=> H2O[c0] + 9-methyl-trans-dec-2-enoyl-ACP[c0]
	rxn04050_c0	precorrin-6A reductase_c0	Cobalt-precorrin 6[c0] + H+[c0] + NADPH[c0] <=> NADP[c0] + Cobalt-precorrin 6B[c0]
	rxn02473_c0	D-erythro-1-(Imidazol-4-yl)glycerol 3-phosphate hydro-lyase_c0	D-erythro-imidazol-glycerol-phosphate[c0] => imidazole acetol-phosphate[c0] + H2O[c0]
	rxn08128_c0	Amylomaltase (maltopentaose)_c0	Maltose[c0] + Maltopentaose[c0] <=> D-Glucose[c0] + Maltohexaose[c0]
	rxn00834_c0	IMP:NAD+ oxidoreductase_c0	IMP[c0] + H2O[c0] + NAD[c0] <=> H+[c0] + XMP[c0] + NADH[c0]
	rxn05293_c0	MECDPDH_c0	H+[c0] + 2-C-methyl-D-erythritol2-4-cyclodiphosphate[c0] + NADH[c0] => H2O[c0] + NAD[c0] + 1-Hydroxy-2-methyl-2-butenyl 4-diphosphate[c0]
	rxn12639_c0	aminopeptidase_c0	H2O[c0] + Ala-Gln[c0] <=> L-Glutamine[c0] + L-Alanine[c0]
	rxn03080_c0	6,7-Dimethyl-8-(1-D-ribityl)lumazine:6,7-dimethyl-8-(1-D-ribityl)_c0	4--1-D-Ribitylamino-5-aminouracil[c0] + 3-4-dihydroxy-2-butanone4-phosphate[c0] <=> 6-7-Dimethyl-8--1-D-ribityllumazine[c0] + H+[c0] + (2)H2O[c0] + Phosphate[c0]
	rxn05150_c0	Zinc-ABC transport_c0	ATP[c0] + H2O[c0] + Zn2+[e0] => H+[c0] + Phosphate[c0] + ADP[c0] + Zn2+[c0]
	rxn02429_c0	ATP:2-dehydro-3-deoxy-galactonokinase_c0	ATP[c0] + 2-Dehydro-3-deoxy-D-galactonate[c0] <=> 2-Dehydro-3-deoxy-D-galactonate 6-phosphate[c0] + ADP[c0]
	rxn05040_c0	3,4-Dihydroxy-2-butanone 4-phosphate synthase_c0	D-Ribulose5-phosphate[c0] => H+[c0] + 3-4-dihydroxy-2-butanone4-phosphate[c0] + Formate[c0]
	rxn01204_c0	4-Aminobutanoate:2-oxoglutarate aminotransferase_c0	GABA[c0] + 2-Oxoglutarate[c0] <=> 4-Oxobutanoate[c0] + L-Glutamate[c0]
	rxn00350_c0	glutathione hydralase (periplasmic)_c0	GSH[c0] + H2O[c0] <=> L-Glutamate[c0] + Cys-Gly[c0]
	rxn05326_c0	Hexanoyl-[acyl-carrier protein]:malonyl-CoA_c0	Hexanoyl-ACP[c0] + NAD[c0] <= H+[c0] + NADH[c0] + (2E)-Hexenoyl-[acp][c0]
	rxn08813_c0	Lysophospholipase L1 (2-acylglycerophosphoglycerol, n-C16:0) (periplasm)_c0	1-Acyl-sn-glycero-3-phosphoglycerol hexadecanoyl[c0] + H2O[c0] <=> H+[c0] + Palmitate[c0] + Glycerophosphoglycerol[c0]
	rxn09562_c0	guanylate kinase (GMP:dATP)_c0	GMP[c0] + dATP[c0] <=> dADP[c0] + GDP[c0]
	rxn00799_c0	(S)-Malate hydro-lyase_c0	L-Malate[c0] <=> H2O[c0] + Fumarate[c0]
	rxn00313_c0	meso-2,6-Diaminoheptanedioate carboxy-lyase_c0	H+[c0] + meso-2,6-Diaminopimelate[c0] => CO2[c0] + L-Lysine[c0]
	rxn09197_c0	Phosphatidylserine decarboxylase (n-C12:0)_c0	(2)H+[c0] + phosphatidylserine didodecanoyl[c0] <=> phosphatidylethanolamine didodecanoyl[c0] + CO2[c0]
	rxn02369_c0	2-Carboxy-2,5-dihydro-5-oxofuran-2-acetate lyase (decyclizing)_c0	4-Carboxymuconolactone[c0] <=> H+[c0] + 3-Carboxy-cis,cis-muconate[c0]
	rxn02791_c0	(5-Glutamyl)-peptide:amino-acid 5-glutamyltransferase_c0	L-3-Cyanoalanine[c0] + L-Glutamate[c0] <=> H2O[c0] + gamma-Glutamyl-beta-cyanoalanine[c0]
	rxn05455_c0	12-methyl-tridecanoyl-ACP:[acyl-carrier-protein] transferase_c0	12-methyl-tridecanoyl-ACP[c0] + CoA[c0] <=> ACP[c0] + fa1coa[c0]
	rxn00086_c0	glutathione:NADP+ oxidoreductase_c0	NADP[c0] + (2)GSH[c0] <=> H+[c0] + Oxidized glutathione[c0] + NADPH[c0]
	rxn11944_c0	Methyltransferase_c0	H+[c0] + S-Adenosyl-homocysteine[c0] + 5-Methyltetrahydropteroyltri-L-glutamate[c0] <= Tetrahydropteroyltri-L-glutamate[c0] + S-Adenosyl-L-methionine[c0]
	rxn11268_c0	phosphate ABC transporter permease protein_c0	H+[e0] + PPi[e0] <= H+[c0] + PPi[c0]
	rxn05344_c0	Tetradecanoyl-[acyl-carrier protein]:malonyl-[acyl-carrier-protein]_c0	H+[c0] + Malonyl-acyl-carrierprotein-[c0] + Myristoyl-ACP[c0] => ACP[c0] + 3-oxohexadecanoyl-acp[c0] + CO2[c0]
	rxn00676_c0	Propanoyl-CoA:acetyl-CoA C-acyltransferase_c0	Propionyl-CoA[c0] + Acetyl-CoA[c0] <=> 2-Methylacetoacetyl-CoA[c0] + CoA[c0]
	rxn01281_c0	(R)-Glycerate:NADP+ oxidoreductase_c0	NADP[c0] + Glycerate[c0] <=> Tartronate semialdehyde[c0] + H+[c0] + NADPH[c0]
	rxn10339_c0	isotetradecanoyl-cardiolipin synthase_c0	(2)Diisotetradecanoylphosphatidylglycerol[c0] <=> Isotetradecanoylcardiolipin (B. subtilis)[c0] + Glycerol[c0]
	rxn10226_c0	isoheptadecanoyl-CDPdiacylglycerol-serine O-phosphatidyltransferase_c0	CDP-1,2-diisoheptadecanoylglycerol[c0] + L-Serine[c0] => H+[c0] + Diisoheptadecanoylphosphatidylserine[c0] + CMP[c0]
	rxn03246_c0	(S)-Hydroxyoctanoyl-CoA:NAD+ oxidoreductase_c0	(S)-Hydroxyoctanoyl-CoA[c0] + NAD[c0] <=> H+[c0] + NADH[c0] + 3-Oxooctanoyl-CoA[c0]
	rxn10237_c0	isohexadecanoyl-phosphatidylserine decarboxylase_c0	(2)H+[c0] + Diisohexadecanoylphosphatidylserine[c0] <=> Diisohexadecanoylphosphatidylethanolamine[c0] + CO2[c0]
	rxn05248_c0	FACOAL150(anteiso)_c0	H+[c0] + ATP[c0] + fa4[c0] + CoA[c0] => AMP[c0] + fa4coa[c0] + PPi[c0]
	rxn08796_c0	Lysophospholipase L1 (2-acylglycerophosphotidate, n-C12:0) (periplasm)_c0	1-dodecanoyl-sn-glycerol 3-phosphate[c0] + H2O[c0] <=> H+[c0] + ddca[c0] + Glycerol-3-phosphate[c0]
	rxn03433_c0	(S)-3-Hydroxyisobutyryl-CoA hydrolase_c0	H2O[c0] + (S)-3-Hydroxyisobutyryl-CoA[c0] => H+[c0] + 3-Hydroxyisobutyrate[c0] + CoA[c0]
	rxn03242_c0	(S)-3-Hydroxydodecanoyl-CoA:NAD+ oxidoreductase_c0	(S)-3-Hydroxydodecanoyl-CoA[c0] + NAD[c0] <=> H+[c0] + NADH[c0] + 3-Oxododecanoyl-CoA[c0]
	rxn10223_c0	isopentadecanoyl-phosphatidate cytidylyltransferase_c0	1,2-diisopentadecanoyl-sn-glycerol 3-phosphate[c0] + CTP[c0] <=> PPi[c0] + CDP-1,2-diisopentadecanoylglycerol[c0]
	rxn01459_c0	4-Aminobutyraldehyde:NAD+ oxidoreductase_c0	4-Aminobutanal[c0] + NADP[c0] + H2O[c0] => (2)H+[c0] + GABA[c0] + NADPH[c0]
	rxn10210_c0	isohexadecanoyl-glycerol-3-phosphate O-acyltransferase_c0	Glycerol-3-phosphate[c0] + fa6coa[c0] => 1-isohexadecanoyl-sn-glycerol 3-phosphate[c0] + CoA[c0]
	rxn08618_c0	glucosyltransferase I (LPS core synthesis)_c0	inner core oligosaccharide lipid A[c0] + UDP-glucose[c0] <=> glucosyl-inner core oligosaccharide lipid A[c0] + UDP[c0]
	rxn00256_c0	Citrate oxaloacetate-lyase ((pro-3S)-CH2COO- -> acetyl-CoA)_c0	Citrate[c0] + H+[c0] + CoA[c0] <= Oxaloacetate[c0] + H2O[c0] + Acetyl-CoA[c0]
	rxn02503_c0	ATP:2-amino-4-hydroxy-6-hydroxymethyl-7,8-dihydropteridine_c0	6-hydroxymethyl dihydropterin[c0] + ATP[c0] <=> AMP[c0] + 7,8-Dihydropterin pyrophosphate[c0]
	rxn09101_c0	phosphatidylglycerol phosphate phosphatase (n-C14:0)_c0	H2O[c0] + Phosphatidylglycerophosphate didodecanoyl[c0] => H+[c0] + Phosphate[c0] + Phosphatidylglycerol didodecanoyl[c0]
	rxn05349_c0	acetyl-CoA:[acyl-carrier-protein] S-acetyltransferase_c0	ACP[c0] + Acetyl-CoA[c0] <=> CoA[c0] + Acetyl-ACP[c0]
	rxn00131_c0	AMP phosphoribohydrolase_c0	AMP[c0] + H2O[c0] <=> Adenine[c0] + ribose-5-phosphate[c0]
	rxn00285_c0	Succinate:CoA ligase (ADP-forming)_c0	Succinate[c0] + ATP[c0] + CoA[c0] <=> Succinyl-CoA[c0] + Phosphate[c0] + ADP[c0]
	rxn00547_c0	ATP:D-fructose 6-phosphotransferase_c0	ATP[c0] + D-Fructose[c0] <=> D-fructose-6-phosphate[c0] + ADP[c0]
	rxn08845_c0	Lysophospholipase L2 (2-acylglycerophosphoglycerol, n-C12:0)_c0	2-Acyl-sn-glycero-3-phosphoglycerol dodecanoyl[c0] + H2O[c0] <=> H+[c0] + ddca[c0] + Glycerophosphoglycerol[c0]
	rxn08655_c0	Glycolate oxidase_c0	Ubiquinone-8[c0] + Glycolate[c0] <=> Ubiquinol-8[c0] + Glyoxalate[c0]
	rxn01989_c0	D-Glucarate hydro-lyase_c0	D-Glucarate[c0] => H2O[c0] + 5-Dehydro-4-deoxy-D-glucarate[c0]
	rxn00250_c0	Pyruvate:carbon-dioxide ligase (ADP-forming)_c0	ATP[c0] + Pyruvate[c0] + H2CO3[c0] <=> H+[c0] + Oxaloacetate[c0] + Phosphate[c0] + ADP[c0]
	rxn01334_c0	Sedoheptulose 1,7-bisphosphate D-glyceraldehyde-3-phosphate-lyase_c0	Sedoheptulose 1,7-bisphosphate[c0] <=> D-Erythrose4-phosphate[c0] + Glycerone-phosphate[c0]
	rxn01028_c0	5,6-Dihydrothymine:NADP+ oxidoreductase_c0	Dihydrothymine[c0] + NADP[c0] <=> Thymine[c0] + H+[c0] + NADPH[c0]
	rxn08087_c0	1-hexadec-7-enoyl-sn-glycerol 3-phosphate O-acyltransferase (n-C16:1)_c0	Hexadecenoyl-ACP[c0] + 1-hexadec-9-enoyl-sn-glycerol 3-phosphate[c0] => ACP[c0] + 1,2-dihexadec-9-enoyl-sn-glycerol 3-phosphate[c0]
	rxn03188_c0	3-Ureidoisobutyrate amidohydrolase_c0	(2)H+[c0] + H2O[c0] + 3-Ureidoisobutyrate[c0] => 3-Aminoisobutanoate[c0] + NH3[c0] + CO2[c0]
	rxn03146_c0	UDP-3-O-acetylglucosamine deacetylase_c0	H2O[c0] + UDP-3-O-(beta-hydroxymyristoyl)-N-acetylglucosamine[c0] <=> UDP-3-O-(beta-hydroxymyristoyl)-D-glucosamine[c0] + Acetate[c0]
	rxn00770_c0	ATP:D-ribose-5-phosphate pyrophosphotransferase_c0	ATP[c0] + ribose-5-phosphate[c0] <=> AMP[c0] + PRPP[c0]
	rxn00192_c0	Acetyl-CoA:L-glutamate N-acetyltransferase_c0	L-Glutamate[c0] + Acetyl-CoA[c0] => H+[c0] + N-Acetyl-L-glutamate[c0] + CoA[c0]
	rxn00611_c0	sn-Glycerol-3-phosphate:NAD+ 2-oxidoreductase_c0	Glycerol-3-phosphate[c0] + NAD[c0] <=> H+[c0] + NADH[c0] + Glycerone-phosphate[c0]
	rxn00211_c0	UDPglucose:NAD+ oxidoreductase_c0	H2O[c0] + UDP-glucose[c0] + (2)NAD[c0] <=> (3)H+[c0] + (2)NADH[c0] + UDPglucuronate[c0]
	rxn00182_c0	L-Glutamate:NAD+ oxidoreductase (deaminating)_c0	H2O[c0] + NAD[c0] + L-Glutamate[c0] <=> H+[c0] + NH3[c0] + NADH[c0] + 2-Oxoglutarate[c0]
	rxn00289_c0	(2S,3R)-3-Hydroxybutane-1,2,3-tricarboxylate pyruvate-lyase_c0	Methylisocitrate[c0] <=> Succinate[c0] + Pyruvate[c0]
	rxn03393_c0	Octaprenyl-hydroxybenzoate decarboxylase_c0	3-Octaprenyl-4-hydroxybenzoate[c0] + H+[c0] => CO2[c0] + 2-Octaprenylphenol[c0]
	rxn05388_c0	5-methyl-hexanoyl-ACP:malonyl-[acyl-carrier-protein] C-acyltransferase (decarboxylating)_c0	H+[c0] + 5-methyl-hexanoyl-ACP[c0] + Malonyl-acyl-carrierprotein-[c0] => ACP[c0] + CO2[c0] + 7-methyl-3-oxo-octanoyl-ACP[c0]
	rxn04783_c0	glycinamide ribonucleotide transformylase_c0	ATP[c0] + GAR[c0] + Formate[c0] => H+[c0] + Phosphate[c0] + ADP[c0] + N-Formyl-GAR[c0]
	rxn08849_c0	Lysophospholipase L2 (2-acylglycerophosphoglycerol, n-C16:1)_c0	H2O[c0] + 2-Acyl-sn-glycero-3-phosphoglycerol hexadec-9-enoyl[c0] <=> H+[c0] + hexadecenoate[c0] + Glycerophosphoglycerol[c0]
	rxn05429_c0	12-methyl-tridecanoyl-ACP:malonyl-[acyl-carrier-protein] C-acyltransferase (decarboxylating)_c0	H+[c0] + 12-methyl-tridecanoyl-ACP[c0] + Malonyl-acyl-carrierprotein-[c0] => ACP[c0] + CO2[c0] + 14-methyl-3-oxo-pentadecanoyl-ACP[c0]
	rxn01739_c0	ATP:shikimate 3-phosphotransferase_c0	ATP[c0] + Shikimate[c0] <=> 3-phosphoshikimate[c0] + ADP[c0]
	rxn00543_c0	Ethanol:NAD+ oxidoreductase_c0	Ethanol[c0] + NAD[c0] <=> H+[c0] + NADH[c0] + Acetaldehyde[c0]
	rxn00347_c0	L-Aspartate ammonia-lyase_c0	L-Aspartate[c0] <=> NH3[c0] + Fumarate[c0]
	rxn10052_c0	adenylate kinase (Inorganic triphosphate)_c0	H+[c0] + AMP[c0] + Triphosphate[c0] <=> PPi[c0] + ADP[c0]
	rxn05406_c0	15-methyl-3-hydroxy-hexa-decanoyl-ACP hydro-lyase_c0	15-methyl-3-hydroxy-hexa-decanoyl-ACP[c0] <=> H2O[c0] + 15-methyl-trans-hexa-dec-2-enoyl-ACP[c0]
	rxn05206_c0	Potassium uptake_c0	K+[e0] <=> K+[c0]
	rxn05552_c0	ethanesulfonate transport via ABC system_c0	ATP[c0] + H2O[c0] + ethanesulfonate[e0] => H+[c0] + Phosphate[c0] + ADP[c0] + ethanesulfonate[c0]
	rxn00102_c0	Carbonic acid hydro-lyase_c0	H+[c0] + H2CO3[c0] <=> H2O[c0] + CO2[c0]
	rxn03236_c0	4a-hydroxytetrahydrobiopterin hydro-lyase_c0	4a-Hydroxytetrahydrobiopterin[c0] <=> Dihydrobiopterin[c0] + H2O[c0]
	rxn00804_c0	L-leucine:NAD+ oxidoreductase(deaminating)_c0	H2O[c0] + NAD[c0] + L-Leucine[c0] <=> H+[c0] + NH3[c0] + NADH[c0] + 4MOP[c0]
	rxn01521_c0	5'-nucleotidase (dUMP)_c0	H2O[c0] + dUMP[c0] => Deoxyuridine[c0] + H+[c0] + Phosphate[c0]
	rxn00097_c0	ATP:AMP phosphotransferase_c0	AMP[c0] + ATP[c0] <=> (2)ADP[c0]
	rxn06591_c0	L-glutamate-semialdehyde: NADP+_c0	H+[c0] + L-Glutamyl-tRNA-Glu[c0] + NADPH[c0] <=> NADP[c0] + tRNA-Glu[c0] + L-Glutamate1-semialdehyde[c0]
	rxn00126_c0	ATP:L-methione S-adenosyltransferase_c0	L-Methionine[c0] + ATP[c0] + H2O[c0] => Phosphate[c0] + S-Adenosyl-L-methionine[c0] + PPi[c0]
	rxn00414_c0	Carbon-dioxide:L-glutamine amido-ligase (ADP-forming,_c0	(2)ATP[c0] + H2O[c0] + L-Glutamine[c0] + H2CO3[c0] => H+[c0] + Phosphate[c0] + Carbamoylphosphate[c0] + L-Glutamate[c0] + (2)ADP[c0]
	rxn05547_c0	Dipeptide transport via ABC system (gly-gln)_c0	ATP[c0] + H2O[c0] + Gly-Gln[e0] => H+[c0] + Phosphate[c0] + ADP[c0] + Gly-Gln[c0]
	rxn05937_c0	Ferredoxin:NADP+ oxidoreductase_c0	H+[c0] + NADP[c0] + Reducedferredoxin[c0] <=> Oxidizedferredoxin[c0] + NADPH[c0]
	rxn00980_c0	2-Phosphoglycolate phosphohydrolase_c0	H2O[c0] + 2-Phosphoglycolate[c0] => H+[c0] + Phosphate[c0] + Glycolate[c0]
	rxn05244_c0	Branched chain amino acid:H+ symporter (Isoleucine)_c0	H+[e0] + L-Isoleucine[e0] <=> H+[c0] + L-Isoleucine[c0]
	rxn02900_c0	(2-Aminoethyl)phosphonate:pyruvate aminotransferase_c0	Pyruvate[c0] + Ciliatine[c0] <=> Phosphonoacetaldehyde[c0] + L-Alanine[c0]
	rxn05365_c0	6-methyl-3-hydroxy-octanoyl-ACP hydro-lyase_c0	6-methyl-3-hydroxy-octanoyl-ACP[c0] <=> H2O[c0] + 6-methyl-trans-oct-2-enoyl-ACP[c0]
	rxn03445_c0	O-Phospho-4-hydroxy-L-threonine:2-oxoglutarate aminotransferase_c0	4-(Phosphonooxy)-threonine[c0] + 2-Oxoglutarate[c0] <=> 2-Oxo-3-hydroxy-4-phosphobutanoate[c0] + L-Glutamate[c0]
	rxn01868_c0	p-Cumic alcohol:NADP+ oxidoreductase_c0	NADP[c0] + H2O[c0] + Betaine aldehyde[c0] => (2)H+[c0] + BET[c0] + NADPH[c0]
	rxn05546_c0	Dipeptide transport via ABC system (gly-asn)_c0	gly-asn-L[e0] + ATP[c0] + H2O[c0] => H+[c0] + gly-asn-L[c0] + Phosphate[c0] + ADP[c0]
	rxn02508_c0	N-(5-Phospho-beta-D-ribosyl)anthranilate ketol-isomerase_c0	N-5-phosphoribosyl-anthranilate[c0] <=> 1-(2-carboxyphenylamino)-1-deoxyribulose 5-phosphate[c0]
	rxn02190_c0	5,6-Dihydrothymine amidohydrolase_c0	Dihydrothymine[c0] + H2O[c0] => H+[c0] + 3-Ureidoisobutyrate[c0]
	rxn05638_c0	L-proline transport in via proton symport_c0	H+[e0] + L-Proline[e0] <=> H+[c0] + L-Proline[c0]
	rxn08801_c0	Lysophospholipase L1 (2-acylglycerophosphotidate, n-C18:0) (periplasm)_c0	1-octadecanoyl-sn-glycerol 3-phosphate[c0] + H2O[c0] <=> ocdca[c0] + H+[c0] + Glycerol-3-phosphate[c0]
	rxn01644_c0	L-Aspartate-4-semialdehyde hydro-lyase (adding pyruvate and_c0	L-Aspartate4-semialdehyde[c0] + Pyruvate[c0] => Dihydrodipicolinate[c0] + H+[c0] + (2)H2O[c0]
	rxn05251_c0	FACOAL170(anteiso)_c0	H+[c0] + ATP[c0] + fa12[c0] + CoA[c0] => fa12coa[c0] + AMP[c0] + PPi[c0]
	rxn04016_c0	S-adenosyl-L-methionine:(E)-prop-1-ene-1,2,3-tricarboxylate_c0	S-Adenosyl-L-methionine[c0] + trans-Aconitate[c0] <=> S-Adenosyl-homocysteine[c0] + (E)-3-(Methoxycarbonyl)pent-2-enedioate[c0]
	rxn05516_c0	cadmium transport out via ABC system_c0	ATP[c0] + H2O[c0] + Cd2+[c0] => H+[c0] + Phosphate[c0] + Cd2+[e0] + ADP[c0]
	rxn02938_c0	1-(5-Phospho-D-ribosyl)-5-amino-4-imidazolecarboxylate carboxy-lyase_c0	5'-Phosphoribosyl-4-carboxy-5-aminoimidazole[c0] + H+[c0] => CO2[c0] + AIR[c0]
	rxn05439_c0	5-methyl-trans-hex-2-enoyl-ACP:NAD+ oxidoreductase (A-specific)_c0	H+[c0] + NADH[c0] + 5-methyl-trans-hex-2-enoyl-ACP[c0] => 5-methyl-hexanoyl-ACP[c0] + NAD[c0]
	rxn01256_c0	Chorismate pyruvatemutase_c0	Chorismate[c0] => Prephenate[c0]
	rxn05339_c0	(3R)-3-Hydroxybutanoyl-[acyl-carrier protein]:NADP+ oxidoreductase_c0	NADP[c0] + (R)-3-Hydroxybutanoyl-[acyl-carrier protein][c0] <=> H+[c0] + Acetoacetyl-ACP[c0] + NADPH[c0]
	rxn01580_c0	L-Pipecolate:oxygen 1,6-oxidoreductase_c0	L-Pipecolate[c0] + O2[c0] => delta1-Piperideine-6-L-carboxylate[c0] + H2O2[c0]
	rxn10268_c0	isopentadecanoyl-Phosphatidylglycerophosphate phosphohydrolase_c0	Diisopentadecanoylphosphatidylglycerophosphate[c0] + H2O[c0] => H+[c0] + Phosphate[c0] + Diisopentadecanoylphosphatidylglycerol[c0]
	rxn05644_c0	D-ribose transport out via ABC system_c0	D-Ribose[c0] + ATP[c0] + H2O[c0] => H+[c0] + D-Ribose[e0] + Phosphate[c0] + ADP[c0]
	rxn00224_c0	Protoporphyrin ferro-lyase_c0	Fe2+[c0] + Protoporphyrin[c0] <=> Heme[c0] + (2)H+[c0]
	rxn00139_c0	AMP:pyrophosphate phosphoribosyltransferase_c0	AMP[c0] + PPi[c0] <= Adenine[c0] + PRPP[c0]
	rxn05451_c0	12-methyl-tetra-decanoyl-ACP:[acyl-carrier-protein] transferase_c0	12-methyl-tetra-decanoyl-ACP[c0] + CoA[c0] <=> ACP[c0] + fa4coa[c0]
	rxn05736_c0	fatty-acid--CoA ligase (tetradecanoate)_c0	H+[c0] + ATP[c0] + Myristic acid[c0] + CoA[c0] => Myristoyl-CoA[c0] + AMP[c0] + PPi[c0]
	rxn05527_c0	cytosine transport in via proton symport_c0	Cytosine[e0] + H+[e0] <=> Cytosine[c0] + H+[c0]
	rxn10253_c0	isoheptadecanoyl-Diacylglycerol kinase_c0	ATP[c0] + 1,2-Diisoheptadecanoyl-sn-glycerol[c0] <=> 1,2-diisoheptadecanoyl-sn-glycerol 3-phosphate[c0] + ADP[c0]
	rxn00931_c0	L-Proline:NADP+ 5-oxidoreductase_c0	NADP[c0] + L-Proline[c0] <=> H+[c0] + 1-Pyrroline-5-carboxylate[c0] + NADPH[c0]
	rxn03904_c0	UDPMurAc(oyl-L-Ala-D-gamma-Glu-L-Lys-D-Ala-D-Ala):undecaprenyl-_c0	UDP-N-acetylmuramoyl-L-alanyl-D-glutamyl-6-carboxy-L-lysyl-D-alanyl- D-alanine[c0] + Undecaprenylphosphate[c0] <=> Undecaprenyl-diphospho-N-acetylmuramoyl-L-alanyl-D-glutamyl-meso-2-6-diaminopimeloyl-D-alanyl-D-alanine[c0] + UMP[c0]
	rxn02465_c0	N-Acetyl-L-glutamate-5-semialdehyde:NADP+ 5-oxidoreductase_c0	NADP[c0] + 2-Acetamido-5-oxopentanoate[c0] + Phosphate[c0] <= n-acetylglutamyl-phosphate[c0] + NADPH[c0]
	rxn08335_c0	dihydoorotic acid dehydrogenase (quinone8)_c0	Ubiquinone-8[c0] + S-Dihydroorotate[c0] => Ubiquinol-8[c0] + Orotate[c0]
	rxn09205_c0	Phosphatidylserine syntase (n-C12:0)_c0	CDP-1,2-didodecanoylglycerol[c0] + L-Serine[c0] => H+[c0] + phosphatidylserine didodecanoyl[c0] + CMP[c0]
	rxn08711_c0	heptosyltransferase II (LPS core synthesis)_c0	heptosyl-kdo2-lipidA[c0] + ADP-L-glycero-D-manno-heptose[c0] <=> ADP[c0] + heptosyl-heptosyl-kdo2-lipidA[c0]
	rxn05957_c0	O-Succinyl-L-homoserine succinate-lyase (adding cysteine)_c0	H2S[c0] + O-Succinyl-L-homoserine[c0] => H+[c0] + Succinate[c0] + Homocysteine[c0]
	rxn03513_c0	S-Adenosyl-L-methionine:precorrin-3B C17-methyltransferase_c0	Precorrin 3B[c0] + S-Adenosyl-L-methionine[c0] <=> (2)H+[c0] + Precorrin 4[c0] + S-Adenosyl-homocysteine[c0]
	rxn00549_c0	D-Fructose-1,6-bisphosphate 1-phosphohydrolase_c0	H2O[c0] + D-fructose-1,6-bisphosphate[c0] => H+[c0] + D-fructose-6-phosphate[c0] + Phosphate[c0]
	rxn08468_c0	FMNH2-dependent monooxygenase (methanesulfonate)_c0	FMNH2[c0] + methanesulfonate[c0] + O2[c0] => H2O[c0] + Sulfite[c0] + Formaldehyde[c0] + FMN[c0]
	rxn08820_c0	Lysophospholipase L2 (2-acylglycerophosphotidate, n-C16:0)_c0	2-hexadecanoyl-sn-glycerol 3-phosphate[c0] + H2O[c0] <=> H+[c0] + Glycerol-3-phosphate[c0] + Palmitate[c0]
	rxn01871_c0	acetyl-CoA:enzyme N6-(dihydrolipoyl)lysine S-acetyltransferase_c0	Dihydrolipoamide[c0] + Acetyl-CoA[c0] <=> CoA[c0] + S-Acetyldihydrolipoamide[c0]
	rxn05029_c0	ATP:cobinamide Cobeta-adenosyltransferase_c0	ATP[c0] + Cobinamide[c0] <=> Adenosyl cobinamide[c0] + Triphosphate[c0]
	rxn01045_c0	L-Valine:NAD+ oxidoreductase(deaminating)_c0	H2O[c0] + NAD[c0] + L-Valine[c0] <=> H+[c0] + 3-Methyl-2-oxobutanoate[c0] + NH3[c0] + NADH[c0]
	rxn05401_c0	13-methyl-3-oxo-tetra-decanoyl-ACP:NADP+ oxidoreductase_c0	13-methyl-3-oxo-tetra-decanoyl-ACP[c0] + H+[c0] + NADPH[c0] <=> NADP[c0] + 13-methyl-3-hydroxy-tetra-decanoyl-ACP[c0]
	rxn05613_c0	L-methionine S-oxide transport via ABC system_c0	ATP[c0] + H2O[c0] + L-Methionine S-oxide[e0] => H+[c0] + Phosphate[c0] + L-Methionine S-oxide[c0] + ADP[c0]
	rxn01265_c0	Nicotinate D-ribonucleotide:pyrophosphate phosphoribosyltransferase_c0	Nicotinate ribonucleotide[c0] + PPi[c0] <=> H+[c0] + Niacin[c0] + PRPP[c0]
	rxn05127_c0	gamma-glutamyl-gamma aminobutyric acid dehydrogenase_c0	NADP[c0] + H2O[c0] + gamma-glutamyl-gamma-butyraldehyde[c0] => (2)H+[c0] + gamma-Glutamyl-GABA[c0] + NADPH[c0]
	rxn03535_c0	ATP:cob(I)yrinic acid-a,c-diamide Cobeta-adenosyltransferase_c0	ATP[c0] + Cob(I)yrinate diamide[c0] <=> Adenosyl cobyrinate diamide[c0] + Triphosphate[c0]
	rxn01740_c0	Shikimate:NADP+ 5-oxidoreductase_c0	NADP[c0] + Shikimate[c0] <=> H+[c0] + 3-Dehydroshikimate[c0] + NADPH[c0]
	rxn08548_c0	glycerol-3-phosphate acyltransferase (C14:1)_c0	Tetradecenoyl-ACP[c0] + Glycerol-3-phosphate[c0] => ACP[c0] + 1-tetradec-7-enoyl-sn-glycerol 3-phosphate[c0]
	rxn08546_c0	glycerol-3-phosphate acyltransferase (C12:0)_c0	Glycerol-3-phosphate[c0] + Dodecanoyl-ACP[c0] => 1-dodecanoyl-sn-glycerol 3-phosphate[c0] + ACP[c0]
	rxn12847_c0	Gly-Try aminopeptidase_c0	H2O[c0] + Gly-Tyr[c0] <=> L-Tyrosine[c0] + Glycine[c0]
	rxn03250_c0	(S)-Hydroxyhexanoyl-CoA hydro-lyase_c0	(S)-Hydroxyhexanoyl-CoA[c0] <=> H2O[c0] + (2E)-Hexenoyl-CoA[c0]
	rxn05371_c0	8-methyl-decanoyl-ACP:malonyl-[acyl-carrier-protein] C-acyltransferase (decarboxylating)_c0	8-methyl-decanoyl-ACP[c0] + H+[c0] + Malonyl-acyl-carrierprotein-[c0] => ACP[c0] + CO2[c0] + 10-methyl-3-oxo-dodecanoyl-ACP[c0]
	rxn00083_c0	NADPH:NAD+ oxidoreductase (B-specific)_c0	NAD[c0] + NADPH[c0] <=> NADP[c0] + NADH[c0]
	rxn05347_c0	Acyl-[acyl-carrier-protein]:malonyl-[acyl-carrier-protein]_c0	H+[c0] + Malonyl-acyl-carrierprotein-[c0] + Acetyl-ACP[c0] => ACP[c0] + CO2[c0] + Acetoacetyl-ACP[c0]
	rxn05338_c0	(3R)-3-Hydroxydecanoyl-[acyl-carrier-protein]:NADP+ oxidoreductase_c0	(R)-3-Hydroxydecanoyl-[acyl-carrier protein][c0] + NADP[c0] <=> H+[c0] + 3-oxodecanoyl-acp[c0] + NADPH[c0]
	rxn00165_c0	L-serine ammonia-lyase_c0	L-Serine[c0] => Pyruvate[c0] + NH3[c0]
	rxn09112_c0	Phosphatidylglycerol synthase (n-C16:1)_c0	Glycerol-3-phosphate[c0] + CDP-1,2-dihexadec-9-enoylglycerol[c0] <=> Phosphatidylglycerophosphate dihexadec-9-enoyl[c0] + CMP[c0]
	rxn00903_c0	L-Valine:2-oxoglutarate aminotransferase_c0	2-Oxoglutarate[c0] + L-Valine[c0] <=> 3-Methyl-2-oxobutanoate[c0] + L-Glutamate[c0]
	rxn00947_c0	Palmitate:CoA ligase (AMP-forming)_c0	H+[c0] + ATP[c0] + Palmitate[c0] + CoA[c0] => Palmitoyl-CoA[c0] + AMP[c0] + PPi[c0]
	rxn03394_c0	rxn03394_c0	H+[c0] + O2[c0] + 2-Octaprenylphenol[c0] + NADPH[c0] => NADP[c0] + H2O[c0] + 2-Octaprenyl-6-hydroxyphenol[c0]
	rxn05400_c0	11-methyl-dodecanoyl-ACP:malonyl-[acyl-carrier-protein] C-acyltransferase (decarboxylating)_c0	H+[c0] + Malonyl-acyl-carrierprotein-[c0] + 11-methyl-dodecanoyl-ACP[c0] => 13-methyl-3-oxo-tetra-decanoyl-ACP[c0] + ACP[c0] + CO2[c0]
	rxn05599_c0	cysteate transport via ABC system_c0	ATP[c0] + H2O[c0] + L-Cysteate[e0] => H+[c0] + Phosphate[c0] + ADP[c0] + L-Cysteate[c0]
	rxn08088_c0	1-octadecanoyl-sn-glycerol 3-phosphate O-acyltransferase (n-C18:0)_c0	Octadecanoyl-ACP[c0] + 1-octadecanoyl-sn-glycerol 3-phosphate[c0] => ACP[c0] + 1,2-dioctadecanoyl-sn-glycerol 3-phosphate[c0]
	rxn10343_c0	Mercury (Hg+2) ABC transporter_c0	ATP[c0] + H2O[c0] + Hg2+[c0] => H+[c0] + Phosphate[c0] + ADP[c0] + Hg2+[e0]
	rxn05154_c0	L-Arginine-ABC transport_c0	ATP[c0] + H2O[c0] + L-Arginine[e0] => H+[c0] + Phosphate[c0] + ADP[c0] + L-Arginine[c0]
	rxn02360_c0	trans-4-Hydroxy-L-proline 2-epimerase_c0	trans-4-Hydroxy-L-proline[c0] <=> cis-4-Hydroxy-D-proline[c0]
	rxn05512_c0	butanesulfonate transport via ABC system_c0	ATP[c0] + H2O[c0] + butanesulfonate[e0] => H+[c0] + Phosphate[c0] + ADP[c0] + butanesulfonate[c0]
	rxn05233_c0	Ribonucleotide reductase: GDP_c0	trdrd[c0] + GDP[c0] => trdox[c0] + H2O[c0] + dGDP[c0]
	rxn05442_c0	11-methyl-trans-dodec-2-enoyl-ACP:NAD+ oxidoreductase (A-specific)_c0	H+[c0] + NADH[c0] + 11-methyl-trans-dodec-2-enoyl-ACP[c0] => NAD[c0] + 11-methyl-dodecanoyl-ACP[c0]
	rxn08819_c0	Lysophospholipase L2 (2-acylglycerophosphotidate, n-C14:1)_c0	H2O[c0] + 2-tetradec-7-enoyl-sn-glycerol 3-phosphate[c0] => H+[c0] + Glycerol-3-phosphate[c0] + tetradecenoate[c0]
	rxn00838_c0	IMP:L-aspartate ligase (GDP-forming)_c0	IMP[c0] + L-Aspartate[c0] + GTP[c0] => (2)H+[c0] + Phosphate[c0] + Adenylosuccinate[c0] + GDP[c0]
	rxn10265_c0	isoheptadecanoyl-Phosphatidylglycerophosphate phosphohydrolase_c0	H2O[c0] + Diisoheptadecanoylphosphatidylglycerophosphate[c0] => H+[c0] + Phosphate[c0] + Diisoheptadecanoylphosphatidylglycerol[c0]
	rxn00065_c0	ATP pyrophosphate-lyase (cyclizing)_c0	ATP[c0] => cAMP[c0] + PPi[c0]
	rxn00141_c0	S-Adenosyl-L-homocysteine hydrolase_c0	H2O[c0] + S-Adenosyl-homocysteine[c0] <=> Adenosine[c0] + Homocysteine[c0]
	rxn05651_c0	sulfate transport in via proton symport_c0	H+[e0] + Sulfate[e0] <=> H+[c0] + Sulfate[c0]
	rxn09102_c0	phosphatidylglycerol phosphate phosphatase (n-C14:0)_c0	Phosphatidylglycerophosphate ditetradecanoyl[c0] + H2O[c0] => H+[c0] + Phosphate[c0] + Phosphatidylglycerol ditetradecanoyl[c0]
	rxn03990_c0	nitric oxide, NAD(P)H2:oxygen oxidoreductase_c0	(2)NO[c0] + NADH[c0] + (2)O2[c0] <=> H+[c0] + (2)Nitrate[c0] + NAD[c0]
	rxn05425_c0	10-methyl-undecanoyl-ACP:malonyl-[acyl-carrier-protein] C-acyltransferase (decarboxylating)_c0	H+[c0] + Malonyl-acyl-carrierprotein-[c0] + 10-methyl-undecanoyl-ACP[c0] => 12-methyl-3-oxo-tridecanoyl-ACP[c0] + ACP[c0] + CO2[c0]
	rxn10234_c0	isotetradecanoyl-phosphatidylserine decarboxylase_c0	(2)H+[c0] + Diisotetradecanoylphosphatidylserine[c0] <=> CO2[c0] + Diisotetradecanoylphosphatidylethanolamine[c0]
	rxn01859_c0	Deoxyadenosine:orthophosphate ribosyltransferase_c0	Deoxyadenosine[c0] + H+[c0] + Phosphate[c0] <=> Adenine[c0] + deoxyribose-1-phosphate[c0]
	rxn05565_c0	galactarate transport in via proton symport_c0	H+[e0] + D-Mucic acid[e0] <=> H+[c0] + D-Mucic acid[c0]
	rxn10202_c0	palmitoyl-glycerol-3-phosphate O-acyltransferase_c0	Palmitoyl-CoA[c0] + Glycerol-3-phosphate[c0] => 1-hexadecanoyl-sn-glycerol 3-phosphate[c0] + CoA[c0]
	rxn00337_c0	ATP:L-aspartate 4-phosphotransferase_c0	H+[c0] + ATP[c0] + L-Aspartate[c0] <=> 4-Phospho-L-aspartate[c0] + ADP[c0]
	rxn05673_c0	galacturonate transport in via proton symport_c0	D-Galacturonate[e0] + H+[e0] <=> D-Galacturonate[c0] + H+[c0]
	rxn01445_c0	2'-Deoxyguanosine 5'-monophosphate phosphohydrolase_c0	dGMP[c0] + H2O[c0] => H+[c0] + Phosphate[c0] + Deoxyguanosine[c0]
	rxn00777_c0	D-Ribose-5-phosphate ketol-isomerase_c0	ribose-5-phosphate[c0] <=> D-Ribulose5-phosphate[c0]
	rxn02889_c0	3-Methylcrotonoyl-CoA:carbon-dioxide ligase (ADP-forming)_c0	ATP[c0] + Dimethylacryloyl-CoA[c0] + H2CO3[c0] <=> H+[c0] + 3-Methylglutaconyl-CoA[c0] + Phosphate[c0] + ADP[c0]
	rxn05602_c0	L-lactate reversible transport via proton symport_c0	H+[e0] + L-Lactate[e0] <=> H+[c0] + L-Lactate[c0]
	rxn01512_c0	ATP:nucleoside-diphosphate phosphatransferase_c0	ATP[c0] + dTDP[c0] <=> TTP[c0] + ADP[c0]
	rxn01466_c0	Geranyl-diphosphate:isopentenyl-diphosphate geranyltrans-transferase_c0	Isopentenyldiphosphate[c0] + Geranyldiphosphate[c0] => PPi[c0] + Farnesyldiphosphate[c0]
	rxn02185_c0	2-Acetolactate pyruvate-lyase (carboxylating)_c0	ALCTT[c0] + TPP[c0] <=> 2-Hydroxyethyl-ThPP[c0] + Pyruvate[c0]
	rxn03406_c0	Undecaprenyl-diphospho-N-acetylmuramoyl-(N-acetylglucosamine)-_c0	ATP[c0] + NH3[c0] + Undecaprenyl-diphospho-N-acetylmuramoyl-(N-acetylglucosamine)-L-alanyl-D-glutamyl-L-lysyl-D-alanyl-D-alanine[c0] => H+[c0] + Phosphate[c0] + Undecaprenyl-diphospho-N-acetylmuramoyl-(N-acetylglucosamine)-L-alanyl-D-glutaminyl-L-lysyl-D-alanyl-D-alanine[c0] + ADP[c0]
	rxn00500_c0	(R)-Lactate:NAD+ oxidoreductase_c0	NAD[c0] + D-Lactate[c0] <=> H+[c0] + Pyruvate[c0] + NADH[c0]
	rxn05358_c0	2-methylbutanoyl-CoA:[acyl-carrier-protein] transferase_c0	ACP[c0] + 2-Methylbutyryl-CoA[c0] <=> 2-methylbutyryl-ACP[c0] + CoA[c0]
	rxn01106_c0	2-Phospho-D-glycerate 2,3-phosphomutase_c0	2-Phospho-D-glycerate[c0] <=> 3-Phosphoglycerate[c0]
	rxn00342_c0	L-Asparagine amidohydrolase_c0	L-Asparagine[c0] + H2O[c0] => L-Aspartate[c0] + NH3[c0]
	rxn08811_c0	Lysophospholipase L1 (2-acylglycerophosphoglycerol, n-C14:0) (periplasm)_c0	H2O[c0] + 1-Acyl-sn-glycero-3-phosphoglycerol tetradecanoyl[c0] <=> H+[c0] + Myristic acid[c0] + Glycerophosphoglycerol[c0]
	rxn00361_c0	ATP:adenylylsulfate 3'-phosphotransferase_c0	ATP[c0] + APS[c0] <=> 3-phosphoadenylylsulfate[c0] + ADP[c0]
	rxn02804_c0	myristoyl-CoA:acetylCoA C-myristoyltransferase_c0	Myristoyl-CoA[c0] + Acetyl-CoA[c0] <=> 3-Oxopalmitoyl-CoA[c0] + CoA[c0]
	rxn10162_c0	Hexadecanoate transport via proton symport_c0	H+[e0] + Palmitate[e0] <=> H+[c0] + Palmitate[c0]
	rxn00293_c0	UTP:N-acetyl-alpha-D-glucosamine-1-phosphate uridylyltransferase_c0	N-Acetyl-D-glucosamine1-phosphate[c0] + UTP[c0] <=> PPi[c0] + UDP-N-acetylglucosamine[c0]
	rxn05542_c0	Dipeptide transport via ABC system (ala-gly)_c0	ATP[c0] + H2O[c0] + L-alanylglycine[e0] => H+[c0] + Phosphate[c0] + L-alanylglycine[c0] + ADP[c0]
	rxn03538_c0	Adenosylcobalamin 5'-phosphate synthase_c0	Adenosylcobinamide-GDP[c0] + alpha-Ribazole[c0] <=> GMP[c0] + Calomide[c0]
	rxn01480_c0	3-Hydroxy-2-methylpropanoate:NAD+ oxidoreductase_c0	3-Hydroxyisobutyrate[c0] + NAD[c0] <=> H+[c0] + 3-Oxo-2-methylpropanoate[c0] + NADH[c0]
	rxn05740_c0	cpd00155 phosphorylase_c0	H+[c0] + Phosphate[c0] + Glycogen[c0] <=> Glucose-1-phosphate[c0] + glycogen(n-1)[c0]
	rxn03181_c0	ATP:2,3,2',3'-tetrakis(3-hydroxytetradecanoyl)-D-glucosaminyl-beta-_c0	ATP[c0] + Lipid A disaccharide[c0] <=> Lipid IV(A)[c0] + ADP[c0]
	rxn05620_c0	MOPS transport via ABC system_c0	ATP[c0] + H2O[c0] + MOPS[e0] => H+[c0] + Phosphate[c0] + ADP[c0] + MOPS[c0]
	rxn00974_c0	citrate hydro-lyase_c0	Citrate[c0] <=> cis-Aconitate[c0] + H2O[c0]
	rxn05485_c0	N-Acetyl-D-glucosamine transport via PEP:Pyr PTS_c0	Phosphoenolpyruvate[c0] + N-Acetyl-D-glucosamine[e0] <=> Pyruvate[c0] + N-Acetyl-D-glucosamine 6-phosphate[c0]
	rxn00119_c0	ATP:nucleoside-phosphate phosphotransferase_c0	UMP[c0] + ATP[c0] <=> UDP[c0] + ADP[c0]
	rxn04070_c0	pyridoxine 5'-phosphate synthase_c0	1-deoxy-D-xylulose5-phosphate[c0] + 3-Amino-2-oxopropyl phosphate[c0] => (2)H+[c0] + (2)H2O[c0] + Phosphate[c0] + Pyridoxine phosphate[c0]
	rxn01646_c0	N-Ribosylnicotinamide:orthophosphate ribosyltransferase_c0	Phosphate[c0] + N-Ribosylnicotinamide[c0] <=> Ribose 1-phosphate[c0] + Nicotinamide[c0]
	rxn05332_c0	(3R)-3-Hydroxypalmitoyl-[acyl-carrier-protein] hydro-lyase_c0	R-3-hydroxypalmitoyl-acyl-carrierprotein-[c0] <=> H2O[c0] + (2E)-Hexadecenoyl-[acp][c0]
	rxn03004_c0	10-Formyltetrahydrofolate:5'-phosphoribosylglycinamide_c0	10-Formyltetrahydrofolate[c0] + GAR[c0] <=> H+[c0] + Tetrahydrofolate[c0] + N-Formyl-GAR[c0]
	rxn11544_c0	Hydrogenobyrinate <=> Hydrogenobyrinate a,c diamide_c0	(2)ATP[c0] + H2O[c0] + Hydrogenobyrinate[c0] + (2)L-Glutamine[c0] <=> Hydrogenobyrinate diamide[c0] + PPi[c0] + (2)L-Glutamate[c0] + (2)ADP[c0]
	rxn02925_c0	L-Alanine:3-oxopropanoate aminotransferase_c0	3-Oxo-2-methylpropanoate[c0] + L-Alanine[c0] <=> L-3-Amino-isobutyrate[c0] + Pyruvate[c0]
	rxn02277_c0	7,8-Diaminononanoate:carbon-dioxide cyclo-ligase_c0	ATP[c0] + CO2[c0] + 7-8-Diaminononanoate[c0] => Dethiobiotin[c0] + (3)H+[c0] + Phosphate[c0] + ADP[c0]
	rxn10147_c0	Cob(1)alamin transport via ABC system_c0	ATP[c0] + H2O[c0] + Cbl[e0] => H+[c0] + Phosphate[c0] + Cbl[c0] + ADP[c0]
	rxn09657_c0	Thiamine transport in via proton symport_c0	H+[e0] + Thiamin[e0] <=> H+[c0] + Thiamin[c0]
	rxn05735_c0	aldehyde dehydrogenase (aminoacetaldehyde, NAD)_c0	H2O[c0] + NAD[c0] + Aminoacetaldehyde[c0] => (2)H+[c0] + NADH[c0] + Glycine[c0]
	rxn00691_c0	10-Formyltetrahydrofolate amidohydrolase_c0	10-Formyltetrahydrofolate[c0] + H2O[c0] => H+[c0] + Tetrahydrofolate[c0] + Formate[c0]
	rxn12638_c0	aminopeptidase_c0	gly-pro-L[c0] + H2O[c0] => H+[c0] + L-Proline[c0] + Glycine[c0]
	rxn12643_c0	aminopeptidase_c0	H2O[c0] + Ala-Leu[c0] => L-Leucine[c0] + L-Alanine[c0]
	rxn10207_c0	isotetradecanoyl-glycerol-3-phosphate O-acyltransferase_c0	Glycerol-3-phosphate[c0] + fa1coa[c0] => 1-isotetradecanoyl-sn-glycerol 3-phosphate[c0] + CoA[c0]
	rxn05663_c0	L-tryptophan transport in via proton symport_c0	L-Tryptophan[e0] + H+[e0] <=> L-Tryptophan[c0] + H+[c0]
	rxn08558_c0	glycerol-3-phosphate dehydrogenase (demethylmenaquinone-8)_c0	Glycerol-3-phosphate[c0] + 2-Demethylmenaquinone 8[c0] => 2-Demethylmenaquinol 8[c0] + Glycerone-phosphate[c0]
	rxn11650_c0	cob(II)yrinic acid-a,c-diamide:FMN oxidoreductase_c0	(2)Cob(II)yrinate diamide[c0] + FMNH2[c0] <=> (2)H+[c0] + FMN[c0] + (2)Cob(I)yrinate diamide[c0]
	rxn02264_c0	Hydroxymethylbilane hydro-lyase(cyclizing)_c0	Hydroxymethylbilane[c0] <=> UroporphyrinogenIII[c0] + H2O[c0]
	rxn01225_c0	Guanine aminohydrolase_c0	Guanine[c0] + H+[c0] + H2O[c0] => XAN[c0] + NH3[c0]
	rxn04989_c0	L-phenylalanine,tetrahydrobiopterin:oxygen_c0	L-Phenylalanine[c0] + Tetrahydrobiopterin[c0] + O2[c0] => 4a-Hydroxytetrahydrobiopterin[c0] + L-Tyrosine[c0]
	rxn03903_c0	UDPMurAc(oyl-L-Ala-D-gamma-Glu-L-Lys-D-Ala-D-Ala):undecaprenyl-_c0	UDPMurAc(oyl-L-Ala-D-gamma-Glu-L-Lys-D-Ala-D-Ala)[c0] + Undecaprenylphosphate[c0] <=> UMP[c0] + MurAc(oyl-L-Ala-D-gamma-Glu-L-Lys-D-Ala-D-Ala)-diphospho- undecaprenol[c0]
	rxn10132_c0	Cyanate transport via proton symport_c0	H+[e0] + Cyanate[e0] <=> H+[c0] + Cyanate[c0]
	rxn00623_c0	hydrogen-sulfide:NADP+ oxidoreductase_c0	(3)NADP[c0] + (3)H2O[c0] + H2S[c0] <=> (4)H+[c0] + Sulfite[c0] + (3)NADPH[c0]
	rxn05627_c0	nitrate transport in via proton symport_c0	H+[e0] + Nitrate[e0] <=> H+[c0] + Nitrate[c0]
	rxn05447_c0	8-methyl-trans-non-2-enoyl-ACP:NAD+ oxidoreductase (A-specific)_c0	8-methyl-trans-non-2-enoyl-ACP[c0] + H+[c0] + NADH[c0] => 8-methyl-nonanoyl-ACP[c0] + NAD[c0]
	rxn07432_c0	rxn07432_c0	H+[c0] + 4MOP[c0] + TPP[c0] => 3-Methyl-1-hydroxybutyl-TPP[c0] + CO2[c0]
	rxn08352_c0	1-hydroxy-2-methyl-2-(E)-butenyl 4-diphosphate reductase (dmpp)_c0	H+[c0] + NADH[c0] + 1-Hydroxy-2-methyl-2-butenyl 4-diphosphate[c0] => H2O[c0] + NAD[c0] + DMAPP[c0]
	rxn06335_c0	(S)-2-methylbutanoyl-CoA:enzyme N6-(dihydrolipoyl)lysine_c0	Dihydrolipoamide[c0] + 2-Methylbutyryl-CoA[c0] <=> CoA[c0] + S-(2-Methylbutanoyl)-dihydrolipoamide-E[c0]
	rxn05209_c0	Proton sodium antiport_c0	H+[c0] + Na+[e0] <=> H+[e0] + Na+[c0]
	rxn08306_c0	CDP-diacylglycerol synthetase (n-C12:0)_c0	1,2-didodecanoyl-sn-glycerol 3-phosphate[c0] + CTP[c0] <=> PPi[c0] + CDP-1,2-didodecanoylglycerol[c0]
	rxn05535_c0	Dipeptide transport via ABC system (gly-met)_c0	ATP[c0] + Gly-Met[e0] + H2O[c0] => H+[c0] + Gly-Met[c0] + Phosphate[c0] + ADP[c0]
	rxn05360_c0	4-methyl-3-oxo-hexanoyl-ACP:NADP+ oxidoreductase_c0	4-methyl-3-oxo-hexanoyl-ACP[c0] + H+[c0] + NADPH[c0] <=> NADP[c0] + 4-methyl-3-hydroxy-hexanoyl-ACP[c0]
	rxn03031_c0	Succinyl-CoA:2,3,4,5-tetrahydropyridine-2,6-dicarboxylate_c0	Succinyl-CoA[c0] + H2O[c0] + tetrahydrodipicolinate[c0] <= CoA[c0] + N-Succinyl-L-2-amino-6-oxopimelate[c0]
	rxn00148_c0	ATP:pyruvate O2-phosphotransferase_c0	ATP[c0] + Pyruvate[c0] <=> Phosphoenolpyruvate[c0] + ADP[c0]
	rxn08804_c0	Lysophospholipase L1 (2-acylglycerophosphoethanolamine, n-C14:0) (periplasm)_c0	H2O[c0] + 1-Acyl-sn-glycero-3-phosphoethanolamine tetradecanoyl[c0] <=> H+[c0] + Myristic acid[c0] + Glycerophosphoethanolamine[c0]
	rxn00913_c0	Guanosine 5'-monophosphate phosphohydrolase_c0	GMP[c0] + H2O[c0] => H+[c0] + Phosphate[c0] + Guanosine[c0]
	rxn00214_c0	UDPglucose 4-epimerase_c0	UDP-glucose[c0] <=> UDP-galactose[c0]
	rxn00874_c0	Acetyl-CoA:acetyl-CoA C-acetyltransferase_c0	Butyryl-CoA[c0] + Acetyl-CoA[c0] <=> CoA[c0] + 3-Oxohexanoyl-CoA[c0]
	rxn05197_c0	Uracil ion-coupled transport_c0	Uracil[e0] + H+[e0] <=> Uracil[c0] + H+[c0]
	rxn06600_c0	S-aminomethyldihydrolipoylprotein:(6S)-tetrahydrofolate_c0	Tetrahydrofolate[c0] + S-Aminomethyldihydrolipoylprotein[c0] => NH3[c0] + 5-10-Methylenetetrahydrofolate[c0] + Dihydrolipolprotein[c0]
	rxn05438_c0	14-methyl-trans-hexa-dec-2-enoyl-ACP:NAD+ oxidoreductase (A-specific)_c0	14-methyl-trans-hexa-dec-2-enoyl-ACP[c0] + H+[c0] + NADH[c0] => 14-methyl-hexa-decanoyl-ACP[c0] + NAD[c0]
	rxn08085_c0	1-tetradec-7-enoyl-sn-glycerol 3-phosphate O-acyltransferase (n-C14:1)_c0	Tetradecenoyl-ACP[c0] + 1-tetradec-7-enoyl-sn-glycerol 3-phosphate[c0] => ACP[c0] + 1,2-ditetradec-7-enoyl-sn-glycerol 3-phosphate[c0]
	rxn09109_c0	Phosphatidylglycerol synthase (n-C14:0)_c0	CDP-1,2-ditetradecanoylglycerol[c0] + Glycerol-3-phosphate[c0] <=> Phosphatidylglycerophosphate ditetradecanoyl[c0] + CMP[c0]
	rxn08839_c0	Lysophospholipase L2 (2-acylglycerophosphoethanolamine, n-C14:0)_c0	2-Acyl-sn-glycero-3-phosphoethanolamine tetradecanoyl[c0] + H2O[c0] <=> H+[c0] + Myristic acid[c0] + Glycerophosphoethanolamine[c0]
	rxn10258_c0	isohexadecanoyl-Diacylglycerol kinase_c0	ATP[c0] + 1,2-Diisohexadecanoyl-sn-glycerol[c0] <=> 1,2-diisohexadecanoyl-sn-glycerol 3-phosphate[c0] + ADP[c0]
	rxn05289_c0	TRDR_c0	trdox[c0] + H+[c0] + NADPH[c0] <=> NADP[c0] + trdrd[c0]
	rxn02000_c0	dTDP-4-dehydro-6-deoxy-D-glucose 3,5-epimerase_c0	dTDP-4-oxo-6-deoxy-D-glucose[c0] <=> dTDP-4-oxo-L-rhamnose[c0]
	rxn10228_c0	isotetradecanoyl-CDPdiacylglycerol-serine O-phosphatidyltransferase_c0	CDP-1,2-diisotetradecanoylglycerol[c0] + L-Serine[c0] => H+[c0] + Diisotetradecanoylphosphatidylserine[c0] + CMP[c0]
	rxn03249_c0	(S)-Hydroxyhexanoyl-CoA:NAD+ oxidoreductase_c0	NAD[c0] + (S)-Hydroxyhexanoyl-CoA[c0] <=> H+[c0] + NADH[c0] + 3-Oxohexanoyl-CoA[c0]
	rxn09448_c0	fatty-acid--CoA ligase (octadecenoate)_c0	octadecenoate[c0] + H+[c0] + ATP[c0] + CoA[c0] => AMP[c0] + Octadecenoyl-CoA[c0] + PPi[c0]
	rxn01851_c0	4-aminobutanal:NAD+ 1-oxidoreductase_c0	4-Aminobutanal[c0] + H2O[c0] + NAD[c0] => (2)H+[c0] + NADH[c0] + GABA[c0]
	rxn03421_c0	GTP 7,8-8,9-dihydrolase_c0	2,5-Diaminopyrimidine nucleoside triphosphate[c0] <=> 2,5-Diamino-6-(5'-triphosphoryl-3',4'-trihydroxy-2'-oxopentyl)- amino-4-oxopyrimidine[c0]
	rxn08843_c0	Lysophospholipase L2 (2-acylglycerophosphoethanolamine, n-C18:0)_c0	2-Acyl-sn-glycero-3-phosphoethanolamine (n-C18:0)[c0] + H2O[c0] <=> ocdca[c0] + H+[c0] + Glycerophosphoethanolamine[c0]
	rxn00867_c0	L-Histidine ammonia-lyase_c0	L-Histidine[c0] => NH3[c0] + Urocanate[c0]
	rxn03540_c0	adenosylcobyric acid synthase (glutamine-hydrolysing)_c0	(4)ATP[c0] + (4)H2O[c0] + Adenosyl cobyrinate diamide[c0] + (4)L-Glutamine[c0] <=> (4)H+[c0] + Adenosylcobyric acid[c0] + (4)Phosphate[c0] + (4)L-Glutamate[c0] + (4)ADP[c0]
	rxn12635_c0	aminopeptidase_c0	Gly-Met[c0] + H2O[c0] <=> L-Methionine[c0] + Glycine[c0]
	rxn00213_c0	UTP:alpha-D-glucose-1-phosphate uridylyltransferase_c0	Glucose-1-phosphate[c0] + UTP[c0] <=> UDP-glucose[c0] + PPi[c0]
	rxn05409_c0	2-methylpropionyl-ACP:malonyl-[acyl-carrier-protein] C-acyltransferase (decarboxylating)_c0	H+[c0] + Malonyl-acyl-carrierprotein-[c0] + isobutyryl-ACP[c0] => ACP[c0] + CO2[c0] + 4-methyl-3-oxo-pentanoyl-ACP[c0]
	rxn02934_c0	(2S,3S)-3-Hydroxy-2-methylbutanoyl-CoA hydro-liase_c0	2-methyl-3-hydroxy-butyryl-CoA[c0] <=> H2O[c0] + Tiglyl-CoA[c0]
	rxn10131_c0	arginine/ornithine antiporter_c0	Ornithine[c0] + L-Arginine[e0] <=> Ornithine[e0] + L-Arginine[c0]
	rxn01145_c0	Thymidylate 5'-phosphohydrolase_c0	H2O[c0] + dTMP[c0] => H+[c0] + Thymidine[c0] + Phosphate[c0]
	rxn00493_c0	L-Phenylalanine:2-oxoglutarate aminotransferase_c0	L-Phenylalanine[c0] + 2-Oxoglutarate[c0] <=> Phenylpyruvate[c0] + L-Glutamate[c0]
	rxn00173_c0	Acetyl-CoA:orthophosphate acetyltransferase_c0	H+[c0] + Phosphate[c0] + Acetyl-CoA[c0] <=> Acetylphosphate[c0] + CoA[c0]
	rxn08528_c0	fumarate reductase_c0	Fumarate[c0] + 2-Demethylmenaquinol 8[c0] <=> Succinate[c0] + 2-Demethylmenaquinone 8[c0]
	rxn01509_c0	ATP:(d)GMP phosphotransferase_c0	dGMP[c0] + ATP[c0] <=> dGDP[c0] + ADP[c0]
	rxn03240_c0	(S)-3-Hydroxyhexadecanoyl-CoA hydro-lyase_c0	(S)-3-Hydroxyhexadecanoyl-CoA[c0] <=> (2E)-Hexadecenoyl-CoA[c0] + H2O[c0]
	rxn05414_c0	6-methyl-3-oxo-heptanoyl-ACP:NADP+ oxidoreductase_c0	6-methyl-3-oxo-heptanoyl-ACP[c0] + H+[c0] + NADPH[c0] <=> NADP[c0] + 6-methyl-3-hydroxy-heptanoyl-ACP[c0]
	rxn00789_c0	1-(5-Phospho-D-ribosyl)-ATP:pyrophosphate phosphoribosyl-transferase_c0	PPi[c0] + Phosphoribosyl-ATP[c0] <= ATP[c0] + PRPP[c0]
	rxn05390_c0	7-methyl-3-hydroxy-octanoyl-ACP hydro-lyase_c0	7-methyl-3-hydroxy-octanoyl-ACP[c0] <=> 7-methyl-trans-oct-2-enoyl-ACP[c0] + H2O[c0]
	rxn10481_c0	Copper transport via ABC system_c0	Cu2+[e0] + ATP[c0] + H2O[c0] => Cu2+[c0] + H+[c0] + Phosphate[c0] + ADP[c0]
	rxn06077_c0	L-methionine:oxidized-thioredoxin S-oxidoreductase_c0	trdox[c0] + L-Methionine[c0] + H2O[c0] <=> L-Methionine S-oxide[c0] + trdrd[c0]
	rxn01545_c0	Xanthosine ribohydrolase_c0	H2O[c0] + Xanthosine[c0] <=> D-Ribose[c0] + XAN[c0]
	rxn02895_c0	5-Phospho-D-ribosylamine:glycine ligase (ADP-forming)_c0	ATP[c0] + 5-Phosphoribosylamine[c0] + Glycine[c0] => H+[c0] + GAR[c0] + Phosphate[c0] + ADP[c0]
	rxn10216_c0	isotetradecanoyl-1-acylglycerol-3-phosphate O-acyltransferase_c0	1-isotetradecanoyl-sn-glycerol 3-phosphate[c0] + fa1coa[c0] => CoA[c0] + 1,2-diisotetradecanoyl-sn-glycerol 3-phosphate[c0]
	rxn09211_c0	Phosphatidylserine syntase (n-C18:1)_c0	CDP-1,2-dioctadec-11-enoylglycerol[c0] + L-Serine[c0] => phosphatidylserine dioctadec-11-enoyl[c0] + H+[c0] + CMP[c0]
	rxn01115_c0	6-Phospho-D-gluconate:NADP+ 2-oxidoreductase (decarboxylating)_c0	NADP[c0] + 6-Phospho-D-gluconate[c0] => CO2[c0] + D-Ribulose5-phosphate[c0] + NADPH[c0]
	rxn02312_c0	S-Adenosyl-L-methionine:8-amino-7-oxononanoate aminotransferase_c0	S-Adenosyl-L-methionine[c0] + 8-Amino-7-oxononanoate[c0] <=> S-Adenosyl-4-methylthio-2-oxobutanoate[c0] + 7-8-Diaminononanoate[c0]
	rxn05256_c0	APSPTi_c0	APS[c0] + trdrd[c0] => trdox[c0] + AMP[c0] + Sulfite[c0]
	rxn06075_c0	2'-Deoxyuridine 5'-diphosphate:oxidized-thioredoxin_c0	trdox[c0] + H2O[c0] + dUDP[c0] <= UDP[c0] + trdrd[c0]
	rxn05405_c0	15-methyl-3-oxo-hexa-decanoyl-ACP:NADP+ oxidoreductase_c0	15-methyl-3-oxo-hexa-decanoyl-ACP[c0] + H+[c0] + NADPH[c0] <=> NADP[c0] + 15-methyl-3-hydroxy-hexa-decanoyl-ACP[c0]
	rxn00679_c0	2-Methylcitrate oxaloacetate-lyase_c0	H+[c0] + CoA[c0] + 2-Methylcitrate[c0] <= Propionyl-CoA[c0] + Oxaloacetate[c0] + H2O[c0]
	rxn03951_c0	NAD-dependent threonine 4-phosphate dehydrogenase_c0	NAD[c0] + 4-(Phosphonooxy)-threonine[c0] <=> H+[c0] + 2-Amino-3-oxo-4-phosphonooxybutyrate[c0] + NADH[c0]
	rxn05327_c0	Decanoyl-[acyl-carrier protein]:malonyl-CoA_c0	Decanoyl-ACP[c0] + NAD[c0] <= (2E)-Decenoyl-[acp][c0] + H+[c0] + NADH[c0]
	rxn05423_c0	10-methyl-3-hydroxy-undecanoyl-ACP hydro-lyase_c0	10-methyl-3-hydroxy-undecanoyl-ACP[c0] <=> H2O[c0] + 10-methyl-trans-undec-2-enoyl-ACP[c0]
	rxn10344_c0	Lead (Pb+2) ABC transporter_c0	ATP[c0] + H2O[c0] + Pb[c0] => H+[c0] + Phosphate[c0] + ADP[c0] + Pb[e0]
	rxn12206_c0	malonate decarboxylase_c0	H+[c0] + Malonate[c0] => CO2[c0] + Acetate[c0]
	rxn10474_c0	cobalt transport in/out via permease (no H+)_c0	Co2+[c0] <=> Co2+[e0]
	rxn05404_c0	13-methyl-tetra-decanoyl-ACP:malonyl-[acyl-carrier-protein] C-acyltransferase (decarboxylating)_c0	13-methyl-tetra-decanoyl-ACP[c0] + H+[c0] + Malonyl-acyl-carrierprotein-[c0] => 15-methyl-3-oxo-hexa-decanoyl-ACP[c0] + ACP[c0] + CO2[c0]
	rxn08798_c0	Lysophospholipase L1 (2-acylglycerophosphotidate, n-C14:1) (periplasm)_c0	H2O[c0] + 1-tetradec-7-enoyl-sn-glycerol 3-phosphate[c0] => H+[c0] + Glycerol-3-phosphate[c0] + tetradecenoate[c0]
	rxn05462_c0	trans-Octodec-2-enoyl-ACP hydro-lyase_c0	3-Hydroxyoctodecanoyl-ACP[c0] <=> H2O[c0] + trans-Octodec-2-enoyl-ACP[c0]
	rxn08797_c0	Lysophospholipase L1 (2-acylglycerophosphotidate, n-C14:0) (periplasm)_c0	1-tetradecanoyl-sn-glycerol 3-phosphate[c0] + H2O[c0] <=> H+[c0] + Glycerol-3-phosphate[c0] + Myristic acid[c0]
	rxn01102_c0	ATP:(R)-glycerate 3-phosphotransferase_c0	ATP[c0] + Glycerate[c0] <=> 3-Phosphoglycerate[c0] + ADP[c0]
	rxn08550_c0	glycerol-3-phosphate acyltransferase (C16:1)_c0	Hexadecenoyl-ACP[c0] + Glycerol-3-phosphate[c0] => ACP[c0] + 1-hexadec-9-enoyl-sn-glycerol 3-phosphate[c0]
	rxn02144_c0	4-Carboxymethylbut-3-en-4-olide enol-lactonohydrolase_c0	3-oxoadipate-enol-lactone[c0] + H2O[c0] => 3-Oxoadipate[c0] + H+[c0]
	rxn10336_c0	stearoyl-cardiolipin synthase_c0	(2)Phosphatidylglycerol dioctadecanoyl[c0] <=> Stearoylcardiolipin (B. subtilis)[c0] + Glycerol[c0]
	rxn01643_c0	L-Aspartate-4-semialdehyde:NADP+ oxidoreductase (phosphorylating)_c0	NADP[c0] + L-Aspartate4-semialdehyde[c0] + Phosphate[c0] <= 4-Phospho-L-aspartate[c0] + NADPH[c0]
	rxn01275_c0	ATP:D-Gluconate 6-phosphotransferase_c0	ATP[c0] + GLCN[c0] <=> 6-Phospho-D-gluconate[c0] + ADP[c0]
	rxn10257_c0	anteisopentadecanoyl-Diacylglycerol kinase_c0	ATP[c0] + 1,2-Dianteisopentadecanoyl-sn-glycerol[c0] <=> 1,2-dianteisopentadecanoyl-sn-glycerol 3-phosphate[c0] + ADP[c0]
	rxn00897_c0	N-Acyl-D-glucosamine 2-epimerase_c0	N-Acetyl-D-glucosamine[c0] <=> N-Acetyl-D-mannosamine[c0]
	rxn09209_c0	Phosphatidylserine syntase (n-C16:1)_c0	L-Serine[c0] + CDP-1,2-dihexadec-9-enoylglycerol[c0] => H+[c0] + phosphatidylserine dihexadec-9-enoyl[c0] + CMP[c0]
	rxn02005_c0	trehalose transport via PEP:Pyr PTS_c0	Phosphoenolpyruvate[c0] + TRHL[e0] <=> Trehalose 6-phosphate[c0] + Pyruvate[c0]
	rxn01653_c0	5-Formyltetrahydrofolate cyclo-ligase (ADP-forming)_c0	ATP[c0] + 5-Formyltetrahydrofolate[c0] => 5-10-Methenyltetrahydrofolate[c0] + Phosphate[c0] + ADP[c0]
	rxn08656_c0	Glycolate oxidase_c0	Menaquinone 8[c0] + Glycolate[c0] => Glyoxalate[c0] + Menaquinol 8[c0]
	rxn01029_c0	Agmatine iminohydrolase_c0	H2O[c0] + Agmatine[c0] => NH3[c0] + N-Carbamoylputrescine[c0]
	rxn09198_c0	Phosphatidylserine decarboxylase (n-C14:0)_c0	phosphatidylserine ditetradecanoyl[c0] + (2)H+[c0] <=> CO2[c0] + phosphatidylethanolamine ditetradecanoyl[c0]
	rxn01671_c0	ATP:N-ribosylnicotinamide 5'-phosphotransferase_c0	ATP[c0] + N-Ribosylnicotinamide[c0] <=> Nicotinamide ribonucleotide[c0] + ADP[c0]
	rxn01362_c0	Orotidine-5'-phosphate:pyrophosphate phosphoribosyltransferase_c0	PPi[c0] + Orotidylic acid[c0] <= Orotate[c0] + PRPP[c0]
	rxn09106_c0	phosphatidylglycerol phosphate phosphatase (n-C18:0)_c0	H2O[c0] + Phosphatidylglycerophosphate dioctadecanoyl[c0] => H+[c0] + Phosphate[c0] + Phosphatidylglycerol dioctadecanoyl[c0]
	rxn10270_c0	isohexadecanoyl-Phosphatidylglycerophosphate phosphohydrolase_c0	H2O[c0] + Diisohexadecanoylphosphatidylglycerophosphate[c0] => Diisohexadecanoylphosphatidylglycerol[c0] + H+[c0] + Phosphate[c0]
	rxn02929_c0	2,3,4,5-Tetrahydrodipicolinate:NADP+ oxidoreductase_c0	NADP[c0] + tetrahydrodipicolinate[c0] <=> Dihydrodipicolinate[c0] + H+[c0] + NADPH[c0]
	rxn08846_c0	Lysophospholipase L2 (2-acylglycerophosphoglycerol, n-C14:0)_c0	H2O[c0] + 2-Acyl-sn-glycero-3-phosphoglycerol tetradecanoyl[c0] <=> H+[c0] + Myristic acid[c0] + Glycerophosphoglycerol[c0]
	rxn05450_c0	14-methyl-trans-pentadec-2-enoyl-ACP:NAD+ oxidoreductase (A-specific)_c0	14-methyl-trans-pentadec-2-enoyl-ACP[c0] + H+[c0] + NADH[c0] => 14-methyl-pentadecanoyl-ACP[c0] + NAD[c0]
	rxn06493_c0	dihydrolipoylprotein:NAD+ oxidoreductase_c0	NAD[c0] + Dihydrolipolprotein[c0] <=> H+[c0] + NADH[c0] + Lipoylprotein[c0]
	rxn02402_c0	Nicotinate-nucleotide:pyrophosphate phosphoribosyltransferase_c0	CO2[c0] + Nicotinate ribonucleotide[c0] + PPi[c0] <= Quinolinate[c0] + (2)H+[c0] + PRPP[c0]
	rxn03243_c0	Decanoyl-CoA:acetyl-CoA C-acyltransferase_c0	Decanoyl-CoA[c0] + Acetyl-CoA[c0] <=> 3-Oxododecanoyl-CoA[c0] + CoA[c0]
	rxn03974_c0	FMNH2:NAD+ oxidoreductase_c0	FMNH2[c0] + NAD[c0] <= H+[c0] + NADH[c0] + FMN[c0]
	rxn05375_c0	10-methyl-dodecanoyl-ACP:malonyl-[acyl-carrier-protein] C-acyltransferase (decarboxylating)_c0	10-methyl-dodecanoyl-ACP[c0] + H+[c0] + Malonyl-acyl-carrierprotein-[c0] => ACP[c0] + CO2[c0] + 12-methyl-3-oxo-tetra-decanoyl-ACP[c0]
	rxn10224_c0	anteisopentadecanoyl-phosphatidate cytidylyltransferase_c0	1,2-dianteisopentadecanoyl-sn-glycerol 3-phosphate[c0] + CTP[c0] <=> PPi[c0] + CDP-1,2-dianteisopentadecanoylglycerol[c0]
	rxn00351_c0	gamma-L-Glutamyl-L-cysteine:glycine ligase (ADP-forming)_c0	ATP[c0] + gamma-Glutamylcysteine[c0] + Glycine[c0] => H+[c0] + GSH[c0] + Phosphate[c0] + ADP[c0]
	rxn10231_c0	isohexadecanoyl-CDPdiacylglycerol-serine O-phosphatidyltransferase_c0	CDP-1,2-diisohexadecanoylglycerol[c0] + L-Serine[c0] => H+[c0] + Diisohexadecanoylphosphatidylserine[c0] + CMP[c0]
	rxn02811_c0	3-Isopropylmalate hydro-lyase_c0	3-Isopropylmalate[c0] <=> 2-Isopropylmaleate[c0] + H2O[c0]
	rxn00333_c0	(S)-2-Hydroxy-acid:oxygen 2-oxidoreductase_c0	O2[c0] + Glycolate[c0] => Glyoxalate[c0] + H2O2[c0]
	rxn10262_c0	isopentadecanoyl-CDPdiacylglycerol:sn-glycerol-3-phosphate 3-phosphatidyltransferase_c0	Glycerol-3-phosphate[c0] + CDP-1,2-diisopentadecanoylglycerol[c0] <=> Diisopentadecanoylphosphatidylglycerophosphate[c0] + CMP[c0]
	rxn01286_c0	D-Glyceraldehyde:NAD+ oxidoreductase_c0	H2O[c0] + NAD[c0] + D-Glyceraldehyde[c0] => (2)H+[c0] + NADH[c0] + Glycerate[c0]
	rxn08469_c0	FMNH2-dependent monooxygenase (ethanesulfonate)_c0	FMNH2[c0] + O2[c0] + ethanesulfonate[c0] => H2O[c0] + Sulfite[c0] + FMN[c0] + Acetaldehyde[c0]
	rxn05610_c0	D-mannose transport via PEP:Pyr PTS_c0	D-Mannose[e0] + Phosphoenolpyruvate[c0] <=> D-mannose-6-phosphate[c0] + Pyruvate[c0]
	rxn00199_c0	Oxalosuccinate:NADP+ oxidoreductase (decarboxylating)_c0	H+[c0] + Oxalosuccinate[c0] => CO2[c0] + 2-Oxoglutarate[c0]
	rxn01019_c0	Carbamoyl-phosphate:L-ornithine carbamoyltransferase_c0	Ornithine[c0] + Carbamoylphosphate[c0] => (2)H+[c0] + Phosphate[c0] + Citrulline[c0]
	rxn00412_c0	UTP:ammonia ligase(ADP-forming)_c0	ATP[c0] + H2O[c0] + UTP[c0] + L-Glutamine[c0] => (2)H+[c0] + Phosphate[c0] + L-Glutamate[c0] + ADP[c0] + CTP[c0]
	rxn05457_c0	tetradecanoyl-ACP:[acyl-carrier-protein] transferase_c0	CoA[c0] + Myristoyl-ACP[c0] <=> ACP[c0] + Myristoyl-CoA[c0]
	rxn08310_c0	CDP-diacylglycerol synthetase (n-C16:1)_c0	1,2-dihexadec-9-enoyl-sn-glycerol 3-phosphate[c0] + CTP[c0] <=> PPi[c0] + CDP-1,2-dihexadec-9-enoylglycerol[c0]
	rxn03917_c0	sedoheptulose 7-phosphate isomerase_c0	Sedoheptulose7-phosphate[c0] <=> D-Glycero-D-manno-heptose7-phosphate[c0]
	rxn03135_c0	Imidazole-glycerol-3-phosphate synthase_c0	H+[c0] + AICAR[c0] + L-Glutamate[c0] + D-erythro-imidazol-glycerol-phosphate[c0] <= phosphoribulosylformimino-AICAR-phosphate[c0] + L-Glutamine[c0]
	rxn00469_c0	N2-Acetyl-L-ornithine amidohydrolase_c0	H2O[c0] + N-Acetylornithine[c0] <=> Ornithine[c0] + Acetate[c0]
	rxn05655_c0	sucrose transport via PEP:Pyr PTS_c0	Sucrose[e0] + Phosphoenolpyruvate[c0] <=> 6-Phosphosucrose[c0] + Pyruvate[c0]
	rxn12512_c0	(R)-4'-Phosphopantothenate:L-cysteine ligase_c0	ATP[c0] + L-Cysteine[c0] + 4-phosphopantothenate[c0] => AMP[c0] + PPi[c0] + (R)-4'-Phosphopantothenoyl-L-cysteine[c0]
	rxn09272_c0	succinate dehydrogenase (irreversible)_c0	Succinate[c0] + Ubiquinone-8[c0] <=> Ubiquinol-8[c0] + Fumarate[c0]
	rxn00686_c0	5,6,7,8-Tetrahydrofolate:NADP+ oxidoreductase_c0	NADP[c0] + Tetrahydrofolate[c0] <=> H+[c0] + Dihydrofolate[c0] + NADPH[c0]
	rxn00791_c0	N-(5-Phospho-D-ribosyl)anthranilate:pyrophosphate_c0	N-5-phosphoribosyl-anthranilate[c0] + PPi[c0] <= Anthranilate[c0] + PRPP[c0]
	rxn09201_c0	Phosphatidylserine decarboxylase (n-C16:1)_c0	(2)H+[c0] + phosphatidylserine dihexadec-9-enoyl[c0] <=> CO2[c0] + phosphatidylethanolamine dihexadec-9enoyl[c0]
	rxn05494_c0	D-alanine transport in via proton symport_c0	H+[e0] + D-Alanine[e0] <=> H+[c0] + D-Alanine[c0]
	rxn12432_c0	transport of malonate [extraorganism-cytosol](secondary symport)_c0	Na+[e0] + Malonate[e0] <=> Na+[c0] + Malonate[c0]
	rxn08084_c0	1-tetradecanoyl-sn-glycerol 3-phosphate O-acyltransferase (n-C14:0)_c0	1-tetradecanoyl-sn-glycerol 3-phosphate[c0] + Myristoyl-ACP[c0] => 1,2-ditetradecanoyl-sn-glycerol 3-phosphate[c0] + ACP[c0]
	rxn01636_c0	N2-Acetyl-L-ornithine:L-glutamate N-acetyltransferase_c0	L-Glutamate[c0] + N-Acetylornithine[c0] <=> Ornithine[c0] + N-Acetyl-L-glutamate[c0]
	rxn02303_c0	Coproporphyrinogen:oxygen oxidoreductase(decarboxylating)_c0	(2)H+[c0] + CoproporphyrinogenIII[c0] + O2[c0] <=> (2)H2O[c0] + (2)CO2[c0] + ProtoporphyrinogenIX[c0]
	rxn12850_c0	Gly-Phe ABC transporters_c0	Gly-Phe[e0] + ATP[c0] + H2O[c0] => Gly-Phe[c0] + Phosphate[c0] + ADP[c0]
	rxn05411_c0	4-methyl-3-hydroxy-pentanoyl-ACP hydro-lyase_c0	4-methyl-3-hydroxy-pentanoyl-ACP[c0] <=> H2O[c0] + 4-methyl-trans-pent-2-enoyl-ACP[c0]
	rxn00756_c0	Choline sulfate sulfohydrolase_c0	Choline sulfate[c0] + H2O[c0] => H+[c0] + Sulfate[c0] + Choline[c0]
	rxn01579_c0	L-Pipecolate:NADP+ 2-oxidoreductase_c0	L-Pipecolate[c0] + NADP[c0] <=> delta1-Piperideine-2-carboxylate[c0] + H+[c0] + NADPH[c0]
	rxn03843_c0	Farnesyl diphosphate:Isopentenyl diphosphate farnesyl transferase_c0	Isopentenyldiphosphate[c0] + Farnesyldiphosphate[c0] => PPi[c0] + trans,trans,cis-Geranylgeranyl diphosphate[c0]
	rxn10260_c0	anteisoheptadecanoyl-CDPdiacylglycerol:sn-glycerol-3-phosphate 3-phosphatidyltransferase_c0	CDP-1,2-dianteisoheptadecanoylglycerol[c0] + Glycerol-3-phosphate[c0] <=> Dianteisoheptadecanoylphosphatidylglycerophosphate[c0] + CMP[c0]
	rxn06672_c0	biotin-carboxyl-carrier-protein:carbon-dioxide ligase (ADP-forming)_c0	ATP[c0] + Holo-[carboxylase][c0] + H2CO3[c0] <=> H+[c0] + Phosphate[c0] + Carboxybiotin-carboxyl-carrier protein[c0] + ADP[c0]
	rxn03087_c0	N-Succinyl-L-2,6-diaminoheptanedioate:2-ocoglytarate_c0	N-Succinyl-L-2,6-diaminopimelate[c0] + 2-Oxoglutarate[c0] <=> L-Glutamate[c0] + N-Succinyl-L-2-amino-6-oxopimelate[c0]
	rxn01329_c0	D-Mannose 6-phosphate 1,6-phosphomutase_c0	D-mannose-6-phosphate[c0] <=> D-Mannose1-phosphate[c0]
	rxn04047_c0	precorrin-3B C17-methyltransferase_c0	Cobalt-precorrin 3[c0] + S-Adenosyl-L-methionine[c0] <=> H+[c0] + S-Adenosyl-homocysteine[c0] + Cobalt-precorrin 4[c0]
	rxn05177_c0	Thiamin-ABC transport_c0	ATP[c0] + H2O[c0] + Thiamin[e0] => H+[c0] + Phosphate[c0] + ADP[c0] + Thiamin[c0]
	rxn01353_c0	ATP:nucleoside-diphosphate phosphatransferase_c0	ATP[c0] + dGDP[c0] <=> dGTP[c0] + ADP[c0]
	rxn00077_c0	ATP:NAD+ 2'-phosphotransferase_c0	ATP[c0] + NAD[c0] <=> NADP[c0] + ADP[c0]
	rxn00247_c0	ATP:oxaloacetate carboxy-lyase (transphosphorylating)_c0	H+[c0] + ATP[c0] + Oxaloacetate[c0] => CO2[c0] + Phosphoenolpyruvate[c0] + ADP[c0]
	rxn05379_c0	12-methyl-tetra-decanoyl-ACP:malonyl-[acyl-carrier-protein] C-acyltransferase (decarboxylating)_c0	12-methyl-tetra-decanoyl-ACP[c0] + H+[c0] + Malonyl-acyl-carrierprotein-[c0] => ACP[c0] + CO2[c0] + 14-methyl-3-oxo-hexa-decanoyl-ACP[c0]
	rxn05667_c0	Urea transport via facilitate diffusion_c0	Urea[e0] <=> Urea[c0]
	rxn09450_c0	fatty-acid--CoA ligase (hexadecenoate), peroxisomal_c0	H+[c0] + ATP[c0] + hexadecenoate[c0] + CoA[c0] => Hexadecenoyl-CoA[c0] + AMP[c0] + PPi[c0]
	rxn01213_c0	Dimethylallyl-diphosphate:isopentenyl-diphosphate_c0	Isopentenyldiphosphate[c0] + DMAPP[c0] => PPi[c0] + Geranyldiphosphate[c0]
	rxn05384_c0	3-methylbutanoyl-ACP:malonyl-[acyl-carrier-protein] C-acyltransferase (decarboxylating)_c0	H+[c0] + isovaleryl-ACP[c0] + Malonyl-acyl-carrierprotein-[c0] => 5-methyl-3-oxo-hexanoyl-ACP[c0] + ACP[c0] + CO2[c0]
	rxn01917_c0	ATP:N-acetyl-L-glutamate 5-phosphotransferase_c0	H+[c0] + ATP[c0] + N-Acetyl-L-glutamate[c0] <=> n-acetylglutamyl-phosphate[c0] + ADP[c0]
	rxn01100_c0	ATP:3-phospho-D-glycerate 1-phosphotransferase_c0	H+[c0] + ATP[c0] + 3-Phosphoglycerate[c0] <=> ADP[c0] + 1,3-Bisphospho-D-glycerate[c0]
	rxn01631_c0	5-Aminopentanoate:2-oxoglutarate aminotransferase_c0	5-Aminopentanoate[c0] + 2-Oxoglutarate[c0] <=> L-Glutamate[c0] + 5-Oxopentanoate[c0]
	rxn05389_c0	7-methyl-3-oxo-octanoyl-ACP:NADP+ oxidoreductase_c0	H+[c0] + 7-methyl-3-oxo-octanoyl-ACP[c0] + NADPH[c0] <=> NADP[c0] + 7-methyl-3-hydroxy-octanoyl-ACP[c0]
	rxn05163_c0	Putrescine-ABC transport_c0	Putrescine[e0] + ATP[c0] + H2O[c0] => H+[c0] + Putrescine[c0] + Phosphate[c0] + ADP[c0]
	rxn05515_c0	Cobalamin uptake in via ABC transport_c0	ATP[c0] + H2O[c0] + Vitamin B12r[e0] => H+[c0] + Phosphate[c0] + Vitamin B12r[c0] + ADP[c0]
	rxn03247_c0	(S)-Hydroxyoctanoyl-CoA hydro-lyase_c0	(S)-Hydroxyoctanoyl-CoA[c0] <=> H2O[c0] + (2E)-Octenoyl-CoA[c0]
	rxn01581_c0	L-Pipecolate:(acceptor) 1,6-oxidoreductase_c0	L-Pipecolate[c0] + FAD[c0] <=> delta1-Piperideine-6-L-carboxylate[c0] + FADH2[c0]
	rxn05607_c0	maltose transport via PEP:Pyr PTS_c0	Maltose[e0] + Phosphoenolpyruvate[c0] <=> Pyruvate[c0] + maltose-6-phosphate[c0]
	rxn06777_c0	(S)-3-Hydroxytetradecanoyl-CoA:NAD+ oxidoreductase_c0	NAD[c0] + (S)-3-Hydroxytetradecanoyl-CoA[c0] <=> H+[c0] + NADH[c0] + 3-Oxotetradecanoyl-CoA[c0]
	rxn02939_c0	4-phospho-D-erythronate:NAD+ 2-oxidoreductase_c0	NAD[c0] + 4-Phosphoerythronate[c0] <=> H+[c0] + 2-Oxo-3-hydroxy-4-phosphobutanoate[c0] + NADH[c0]
	rxn00178_c0	Acetyl-CoA:acetyl-CoA C-acetyltransferase_c0	(2)Acetyl-CoA[c0] <=> CoA[c0] + Acetoacetyl-CoA[c0]
	rxn01015_c0	Hydroxypyruvate ketol-isomerase_c0	Hydroxypyruvate[c0] <=> Tartronate semialdehyde[c0]
	rxn10254_c0	anteisoheptadecanoyl-Diacylglycerol kinase_c0	1,2-Dianteisoheptadecanoyl-sn-glycerol[c0] + ATP[c0] <=> 1,2-dianteisoheptadecanoyl-sn-glycerol 3-phosphate[c0] + ADP[c0]
	rxn05545_c0	Dipeptide transport via ABC system (ala-thr)_c0	ATP[c0] + H2O[c0] + ala-L-Thr-L[e0] => H+[c0] + Phosphate[c0] + ala-L-Thr-L[c0] + ADP[c0]
	rxn02339_c0	4-Hydroxy-L-glutamate:2-oxoglutarate aminotransferase_c0	4-Hydroxy-L-glutamate[c0] + 2-Oxoglutarate[c0] <=> 4-Hydroxy-2-oxoglutarate[c0] + L-Glutamate[c0]
	rxn02175_c0	ATP:pantetheine-4'-phosphate adenylyltransferase_c0	ATP[c0] + Phosphopantetheine[c0] <=> Dephospho-CoA[c0] + PPi[c0]
	rxn10163_c0	Tetradecanoate transport via proton symport_c0	H+[e0] + Myristic acid[e0] <=> H+[c0] + Myristic acid[c0]
	rxn07433_c0	rxn07433_c0	3-Methyl-1-hydroxybutyl-TPP[c0] + Lipoamide[c0] <=> S-(3-Methylbutanoyl)-dihydrolipoamide-E[c0] + TPP[c0]
	rxn01544_c0	XMP:pyrophosphate phosphoribosyltransferase_c0	XMP[c0] + PPi[c0] <= XAN[c0] + PRPP[c0]
	rxn00288_c0	Succinate:(acceptor) oxidoreductase_c0	Succinate[c0] + FAD[c0] <= FADH2[c0] + Fumarate[c0]
	rxn00132_c0	Adenosine 5'-monophosphate phosphohydrolase_c0	AMP[c0] + H2O[c0] => H+[c0] + Adenosine[c0] + Phosphate[c0]
	rxn05183_c0	D-Methionine-ABC transport_c0	ATP[c0] + H2O[c0] + D-Methionine[e0] => H+[c0] + Phosphate[c0] + ADP[c0] + D-Methionine[c0]
	rxn01925_c0	2-methylpropanoyl-CoA:enzyme N6-(dihydrolipoyl)lysine_c0	Dihydrolipoamide[c0] + Isobutyryl-CoA[c0] <=> CoA[c0] + S-(2-Methylpropionyl)-dihydrolipoamide[c0]
	rxn01790_c0	(R)-Pantoate:NADP+ 2-oxidoreductase_c0	NADP[c0] + Pantoate[c0] <=> H+[c0] + 2-Dehydropantoate[c0] + NADPH[c0]
	rxn05528_c0	Copper export via ATPase_c0	Cu2+[c0] + ATP[c0] + H2O[c0] => Cu2+[e0] + H+[c0] + Phosphate[c0] + ADP[c0]
	rxn00747_c0	D-Glyceraldehyde-3-phosphate ketol-isomerase_c0	Glyceraldehyde3-phosphate[c0] <=> Glycerone-phosphate[c0]
	rxn01872_c0	succinyl-CoA:enzyme N6-(dihydrolipoyl)lysine S-succinyltransferase_c0	Dihydrolipoamide[c0] + Succinyl-CoA[c0] <=> S-Succinyldihydrolipoamide[c0] + CoA[c0]
	rxn05538_c0	Dipeptide transport via ABC system (gly-pro-L)_c0	ATP[c0] + gly-pro-L[e0] + H2O[c0] => H+[c0] + gly-pro-L[c0] + Phosphate[c0] + ADP[c0]
	rxn02359_c0	trans-4-Hydroxy-L-proline:NAD+ oxidoreductase_c0	FAD[c0] + trans-4-Hydroxy-L-proline[c0] <=> 3-Hydroxy-L-1-pyrroline-5-carboxylate[c0] + FADH2[c0]
	rxn05682_c0	allantoin transport in via proton symport_c0	Allantoin[e0] + H+[e0] <=> Allantoin[c0] + H+[c0]
	rxn00707_c0	ITP:cytidine 5'-phosphotransferase_c0	Cytidine[c0] + ITP[c0] <=> IDP[c0] + CMP[c0]
	rxn03893_c0	Hydroxybenzoate octaprenyltransferase_c0	4-Hydroxybenzoate[c0] + Farnesylfarnesylgeraniol[c0] => 3-Octaprenyl-4-hydroxybenzoate[c0] + PPi[c0]
	rxn02270_c0	(S)-2-methylbutanoyl-CoA:acceptor 2,3-oxidoreductase_c0	FAD[c0] + 2-Methylbutyryl-CoA[c0] <= FADH2[c0] + Tiglyl-CoA[c0]
	rxn02285_c0	UDP-N-acetylmuramate:NADP+ oxidoreductase_c0	UDP-MurNAc[c0] + NADP[c0] <=> UDP-N-acetylglucosamine enolpyruvate[c0] + H+[c0] + NADPH[c0]
	rxn03512_c0	Precorrin 8X 11,12-methylmutase_c0	H+[c0] + Precorrin 8[c0] <=> Hydrogenobyrinate[c0]
	rxn08710_c0	heptosyltransferase I (LPS core synthesis)_c0	kdo2-lipid a[c0] + ADP-L-glycero-D-manno-heptose[c0] <=> heptosyl-kdo2-lipidA[c0] + ADP[c0]
	rxn05146_c0	L-Glutamate-ABC transport_c0	ATP[c0] + H2O[c0] + L-Glutamate[e0] => H+[c0] + Phosphate[c0] + L-Glutamate[c0] + ADP[c0]
	rxn10213_c0	stearoyl-1-acylglycerol-3-phosphate O-acyltransferase_c0	1-octadecanoyl-sn-glycerol 3-phosphate[c0] + strcoa[c0] => 1,2-dioctadecanoyl-sn-glycerol 3-phosphate[c0] + CoA[c0]
	rxn01799_c0	deoxyuridine:orthophosphate 2-deoxy-D-ribosyltransferase_c0	Deoxyuridine[c0] + H+[c0] + Phosphate[c0] <=> Uracil[c0] + deoxyribose-1-phosphate[c0]
	rxn05380_c0	14-methyl-3-oxo-hexa-decanoyl-ACP:NADP+ oxidoreductase_c0	H+[c0] + 14-methyl-3-oxo-hexa-decanoyl-ACP[c0] + NADPH[c0] <=> 14-methyl-3-hydroxy-hexa-decanoyl-ACP[c0] + NADP[c0]
	rxn00237_c0	ATP:nucleoside-diphosphate phosphatransferase_c0	ATP[c0] + GDP[c0] <=> GTP[c0] + ADP[c0]
	rxn05331_c0	(3R)-3-Hydroxybutanoyl-[acyl-carrier-protein] hydro-lyase_c0	D-3-Hydroxydodecanoyl-[acp][c0] <=> H2O[c0] + (2E)-Dodecenoyl-[acp][c0]
	rxn00114_c0	ATP:carbamate phosphotransferase_c0	ATP[c0] + NH3[c0] + CO2[c0] <=> H+[c0] + Carbamoylphosphate[c0] + ADP[c0]
	rxn00420_c0	L-O-Phosphoserine phosphohydrolase_c0	phosphoserine[c0] + H2O[c0] => H+[c0] + Phosphate[c0] + L-Serine[c0]
	rxn00001_c0	Pyrophosphate phosphohydrolase_c0	H2O[c0] + PPi[c0] => (2)H+[c0] + (2)Phosphate[c0]
	rxn01476_c0	6-Phospho-D-glucono-1,5-lactone lactonohydrolase_c0	H2O[c0] + 6-phospho-D-glucono-1-5-lactone[c0] => H+[c0] + 6-Phospho-D-gluconate[c0]
	rxn00058_c0	Ferrocytochrome-c:oxygen oxidoreductase_c0	(4)H+[c0] + (4)Cytochrome c2+[c0] + O2[c0] <=> (2)H2O[c0] + (4)Cytochrome c3+[c0]
	rxn02003_c0	dTDP-6-deoxy-L-mannose:NADP+ 4-oxidoreductase_c0	NADP[c0] + dTDP-rhamnose[c0] <=> dTDP-4-oxo-L-rhamnose[c0] + H+[c0] + NADPH[c0]
	rxn06723_c0	UDP-3-O-(3-hydroxymyristoyl)glucosamine acyltransferase_c0	ACP[c0] + H+[c0] + UDP-2,3-bis(3-hydroxytetradecanoyl)glucosamine[c0] <= HMA[c0] + UDP-3-O-(beta-hydroxymyristoyl)-D-glucosamine[c0]
	rxn01268_c0	Prephenate:NAD+ oxidoreductase(decarboxylating)_c0	Prephenate[c0] + NAD[c0] => p-hydroxyphenylpyruvate[c0] + CO2[c0] + NADH[c0]
	rxn07438_c0	peptide-methionine:thioredoxin-disulfide S-oxidoreductase_c0	trdox[c0] + H2O[c0] + Peptide-L-methionine[c0] <=> Peptide-L-methionine (R)-S-oxide[c0] + trdrd[c0]
	rxn08336_c0	dihydroorotic acid (menaquinone-8)_c0	S-Dihydroorotate[c0] + Menaquinone 8[c0] => Orotate[c0] + Menaquinol 8[c0]
	rxn01961_c0	Xanthosine 5'-phosphate phosphohydrolase_c0	H2O[c0] + XMP[c0] => H+[c0] + Xanthosine[c0] + Phosphate[c0]
	rxn10770_c0	choline dehydrogenase_c0	NAD[c0] + Choline[c0] <=> H+[c0] + NADH[c0] + Betaine aldehyde[c0]
	rxn05501_c0	arbutin transport via PEP:Pyr PTS_c0	Ursin[e0] + Phosphoenolpyruvate[c0] <=> Pyruvate[c0] + Arbutin-6P[c0]
	rxn10220_c0	isoheptadecanoyl-phosphatidate cytidylyltransferase_c0	1,2-diisoheptadecanoyl-sn-glycerol 3-phosphate[c0] + CTP[c0] <=> CDP-1,2-diisoheptadecanoylglycerol[c0] + PPi[c0]
	rxn03907_c0	CTP: 2-C-Methyl-D-erythritol 4-phosphate cytidylyltransferase_c0	2-C-methyl-D-erythritol4-phosphate[c0] + CTP[c0] <=> 4--cytidine5-diphospho-2-C-methyl-D-erythritol[c0] + PPi[c0]
	rxn01517_c0	ATP:dTMP phosphotransferase_c0	ATP[c0] + dUMP[c0] <=> dUDP[c0] + ADP[c0]
	rxn00851_c0	D-AlanineD-Alanine ligase (ADP-forming)_c0	ATP[c0] + (2)D-Alanine[c0] => H+[c0] + Phosphate[c0] + Ala-Ala[c0] + ADP[c0]
	rxn00858_c0	Agmatine amidinohydrolase_c0	H2O[c0] + Agmatine[c0] => Putrescine[c0] + Urea[c0]
	rxn02268_c0	(S)-2-methylbutanoyl-CoA:oxygen 2,3-oxidoreductase_c0	(2)2-Methylbutyryl-CoA[c0] + O2[c0] => (2)H2O[c0] + (2)Tiglyl-CoA[c0]
	rxn00831_c0	Inosine 5'-monophosphate phosphohydrolase_c0	IMP[c0] + H2O[c0] => Inosine[c0] + H+[c0] + Phosphate[c0]
	rxn00407_c0	CTP aminohydrolase_c0	H+[c0] + H2O[c0] + CTP[c0] => NH3[c0] + UTP[c0]
	rxn05454_c0	15-methyl-hexa-decanoyl-ACP:[acyl-carrier-protein] transferase_c0	15-methyl-hexa-decanoyl-ACP[c0] + CoA[c0] <=> ACP[c0] + fa11coa[c0]
	rxn05625_c0	nitrite transport in via proton symport_c0	Nitrite[e0] + H+[e0] <=> Nitrite[c0] + H+[c0]
	rxn00101_c0	Urea amidohydrolase_c0	(2)H+[c0] + Urea[c0] + H2O[c0] => (2)NH3[c0] + CO2[c0]
	rxn02376_c0	3-Carboxy-1-hydroxypropyl-ThPP:lipoamde_c0	Lipoamide[c0] + 3-Carboxy-1-hydroxypropyl-ThPP[c0] <=> S-Succinyldihydrolipoamide[c0] + TPP[c0]
	rxn02680_c0	Octanoyl-CoA:acetyl-CoA C-acyltransferase_c0	Octanoyl-CoA[c0] + Acetyl-CoA[c0] <=> 3-Oxodecanoyl-CoA[c0] + CoA[c0]
	rxn05301_c0	TYRt6_c0	H+[e0] + L-Tyrosine[e0] <=> H+[c0] + L-Tyrosine[c0]
	rxn08470_c0	FMNH2-dependent monooxygenase (butanesulfonate)_c0	FMNH2[c0] + butanesulfonate[c0] + O2[c0] => H2O[c0] + Sulfite[c0] + FMN[c0] + Butanal[c0]
	rxn05343_c0	Octanoyl-[acyl-carrier protein]:malonyl-[acyl-carrier-protein]_c0	H+[c0] + Malonyl-acyl-carrierprotein-[c0] + Octanoyl-ACP[c0] => ACP[c0] + CO2[c0] + 3-oxodecanoyl-acp[c0]
	rxn00336_c0	Isocitrate glyoxylate-lyase_c0	Isocitrate[c0] <=> Succinate[c0] + Glyoxalate[c0]
	rxn05243_c0	Branched chain amino acid:H+ symporter (Leucine)_c0	H+[e0] + L-Leucine[e0] <=> H+[c0] + L-Leucine[c0]
	rxn10571_c0	magnesium transport via ABC system_c0	ATP[c0] + H2O[c0] + Mg[e0] => H+[c0] + Phosphate[c0] + ADP[c0] + Mg[c0]
	rxn05195_c0	Fe3+-ABC transport_c0	fe3[e0] + ATP[c0] + H2O[c0] => fe3[c0] + H+[c0] + Phosphate[c0] + ADP[c0]
	rxn00062_c0	ATP phosphohydrolase (protein-secreting)_c0	ATP[c0] + H2O[c0] => H+[c0] + Phosphate[c0] + ADP[c0]
	rxn01208_c0	2-Oxo-4-methyl-3-carboxypentanoate decarboxylation_c0	CO2[c0] + 4MOP[c0] <= 2-isopropyl-3-oxosuccinate[c0] + H+[c0]
	rxn04132_c0	rxn04132_c0	H2O[c0] + 5-Hydroxyisourate[c0] => CO2[c0] + (R)-Allantoin[c0]
	rxn04133_c0	rxn04133_c0	H2O[c0] + 5-Hydroxyisourate[c0] => Allantoin[c0] + CO2[c0]
	rxn05319_c0	H2Ot5_c0	H2O[e0] <= H2O[c0]
	rxn05467_c0	CO2 transport via diffusion_c0	CO2[e0] <=> CO2[c0]
	rxn05468_c0	O2 transport via diffusion_c0	O2[e0] <=> O2[c0]
	rxn02374_c0	L-glutamate 5-semialdehyde dehydratase (spontaneous)_c0	L-Glutamate5-semialdehyde[c0] => H+[c0] + H2O[c0] + 1-Pyrroline-5-carboxylate[c0]
	rxn05116_c0	rxn05116_c0	H+[c0] + 2-Amino-3-oxo-4-phosphonooxybutyrate[c0] => CO2[c0] + 3-Amino-2-oxopropyl phosphate[c0]
	rxn03012_c0	rxn03012_c0	L-2-Amino-6-oxopimelate[c0] => H+[c0] + H2O[c0] + tetrahydrodipicolinate[c0]
	rxn05064_c0	carbamate hydro-lyase_c0	(2)H+[c0] + Carbamate[c0] <=> NH3[c0] + CO2[c0]
	rxn02666_c0	L-2-amino-3-oxobutanoate decarboxylation (spontaneous)_c0	Aminoacetone[c0] + CO2[c0] <= L-2-Amino-acetoacetate[c0] + H+[c0]
	rxn04457_c0	rxn04457_c0	H+[c0] + 5-Hydroxy-2-oxo-4-ureido-2,5-dihydro-1H-imidazole-5-carboxylate[c0] => CO2[c0] + (R)-Allantoin[c0]
	rxn04456_c0	rxn04456_c0	H+[c0] + 5-Hydroxy-2-oxo-4-ureido-2,5-dihydro-1H-imidazole-5-carboxylate[c0] => Allantoin[c0] + CO2[c0]
	rxn01664_c0	2-Aminoadipate 6-semialdehyde_c0	delta1-Piperideine-6-L-carboxylate[c0] + H+[c0] + H2O[c0] <= 2-Aminoadipate 6-semialdehyde[c0]
	rxn02916_c0	6-Amino-2-oxohexanoate cyclation_c0	2-Oxo-6-aminocaproate[c0] => delta1-Piperideine-2-carboxylate[c0] + H+[c0] + H2O[c0]

## Sheet: ORTHOMCL
	Cluster	Description	Rhizosphere				Endosphere
			GM25	GM48	GM49	GM74	GM16	GM24	GM30	GM80	GM33	GM55	GM78	GM102	GM18	GM21	GM41	GM50	GM60	GM67	GM79
	ORTHOMCL6052	Acyl-CoA dehydrogenases( EC:1.3.99.3 )	1	1	1	1	0	0	0	0	1	1	0	0	0	1	0	0	0	0	0
	ORTHOMCL6053	Acyl-CoA dehydrogenases	1	1	1	1	0	0	0	0	1	1	0	0	0	1	0	0	0	0	0
	ORTHOMCL6054	Protein of unknown function (DUF1329).	1	1	1	1	0	0	0	0	1	1	0	0	0	1	0	0	0	0	0
	ORTHOMCL4194	carbon-nitrogen hydrolase family protein( EC:3.5.1.53 )	0	0	0	0	1	1	0	1	0	0	1	1	1	1	1	1	1	1	1
	ORTHOMCL4357	ABC transporter, ATP-binding/permease protein	0	0	0	0	1	1	1	1	0	0	1	1	1	1	1	1	1	1	1
	ORTHOMCL5776	Acyl-CoA synthetases (AMP-forming)/AMP-acid ligases II( EC:6.2.1.- )	1	1	1	1	0	0	0	0	1	1	1	0	0	1	0	0	0	0	0
	ORTHOMCL5777	Predicted hydrolases or acyltransferases (alpha/beta hydrolase superfamily)( EC:3.7.1.- )	1	1	1	1	0	0	0	0	1	1	1	0	0	1	0	0	0	0	0
	ORTHOMCL5778	Acyl CoA:acetate/3-ketoacid CoA transferase, alpha subunit( EC:2.8.3.12 )	1	1	1	1	0	0	0	0	1	1	1	0	0	1	0	0	0	0	0
	ORTHOMCL5779	hypothetical protein( EC:2.8.3.12 )	1	1	1	1	0	0	0	0	1	1	1	0	0	1	0	0	0	0	0
	ORTHOMCL5780	Enoyl-CoA hydratase/carnithine racemase( EC:4.2.1.17 )	1	1	1	1	0	0	0	0	1	1	1	0	0	1	0	0	0	0	0
	ORTHOMCL5781	Enoyl-CoA hydratase/carnithine racemase( EC:4.2.1.17 )	1	1	1	1	0	0	0	0	1	1	1	0	0	1	0	0	0	0	0
	ORTHOMCL5782	Acyl-CoA dehydrogenases( EC:1.3.99.10 )	1	1	1	1	0	0	0	0	1	1	1	0	0	1	0	0	0	0	0
	ORTHOMCL5783	Acyl-CoA dehydrogenases( EC:1.3.8.1 )	1	1	1	1	0	0	0	0	1	1	1	0	0	1	0	0	0	0	0
	ORTHOMCL5784	acetyl-CoA acetyltransferases( EC:2.3.1.9 )	1	1	1	1	0	0	0	0	1	1	1	0	0	1	0	0	0	0	0
	ORTHOMCL5785	Dehydrogenases with different specificities (related to short-chain alcohol dehydrogenases)	1	1	1	1	0	0	0	0	1	1	1	0	0	1	0	0	0	0	0
	ORTHOMCL5786	Dehydrogenases with different specificities (related to short-chain alcohol dehydrogenases)( EC:1.1.1.100 )	1	1	1	1	0	0	0	0	1	1	1	0	0	1	0	0	0	0	0
	ORTHOMCL5787	Acyl dehydratase	1	1	1	1	0	0	0	0	1	1	1	0	0	1	0	0	0	0	0
	ORTHOMCL5788	Rieske [2Fe-2S] domain.	1	1	1	1	0	0	0	0	1	1	1	0	0	1	0	0	0	0	0
	ORTHOMCL5790	2-keto-4-pentenoate hydratase( EC:4.1.1.77 )	1	1	1	1	0	0	0	0	1	1	1	0	0	1	0	0	0	0	0
	ORTHOMCL5791	DNA-binding HTH domain-containing proteins	1	1	1	1	0	0	0	0	1	1	1	0	0	1	0	0	0	0	0
	ORTHOMCL5806	Succinate dehydrogenase/fumarate reductase, flavoprotein subunit	1	1	1	1	0	0	0	0	1	1	1	0	0	1	0	0	0	0	0
	ORTHOMCL5807	Dehydrogenases with different specificities (related to short-chain alcohol dehydrogenases)	1	1	1	1	0	0	0	0	1	1	1	0	0	1	0	0	0	0	0
	ORTHOMCL5808	Protein of unknown function (DUF1302).	1	1	1	1	0	0	0	0	1	1	1	0	0	1	0	0	0	0	0
	ORTHOMCL4208	hypothetical protein	0	0	0	0	1	1	0	1	1	0	1	1	0	1	1	1	1	1	1
	ORTHOMCL5432	hypothetical protein	1	1	1	1	0	0	0	0	1	1	1	1	0	1	0	0	0	0	0
	ORTHOMCL5582	Flavodoxin reductases (ferredoxin-NADPH reductases) family 1	1	1	1	1	0	0	0	0	1	1	1	0	0	1	0	0	0	0	0
	ORTHOMCL5620	Predicted ring-cleavage extradiol dioxygenase( EC:1.13.11.39,EC:1.13.11.- )	1	1	1	1	0	0	0	0	1	1	1	1	0	1	0	0	0	0	0
	ORTHOMCL4119	homocysteine S-methyltransferase family protein	0	0	0	0	1	1	0	1	0	0	0	1	1	0	1	1	1	1	1
	ORTHOMCL4244	hypothetical protein	0	0	0	0	1	1	1	1	0	0	0	1	1	0	0	1	1	1	1
	ORTHOMCL4382	phenazine biosynthesis protein, PhzF family	0	0	0	0	0	0	1	0	0	0	1	1	1	1	1	1	1	1	1
	ORTHOMCL4492	von Willebrand factor, type A( EC:2.7.11.1 )	0	0	0	0	0	0	0	0	1	1	1	1	0	1	1	1	1	1	1
	ORTHOMCL4493	ABC transporter	0	0	0	0	0	0	0	0	1	1	1	1	0	1	1	1	1	1	1
	ORTHOMCL4494	Protein of unknown function DUF214	0	0	0	0	0	0	0	0	1	1	1	1	0	1	1	1	1	1	1
	ORTHOMCL4495	Protein of unknown function DUF323	0	0	0	0	0	0	0	0	1	1	1	1	0	1	1	1	1	1	1
	ORTHOMCL4911	Long-chain acyl-CoA synthetases (AMP-forming)	0	0	0	0	1	1	0	0	1	0	1	1	0	1	0	1	1	1	1
	ORTHOMCL4912	Thermostable hemolysin.	0	0	0	0	1	1	0	0	1	0	1	1	0	1	0	1	1	1	1
	ORTHOMCL5042	3-methyl-2-oxobutanoate hydroxymethyltransferase( EC:2.1.2.11 )	0	0	0	0	1	1	0	1	1	1	0	1	1	0	1	1	0	0	1
	ORTHOMCL5043	acyl carrier protein phosphodiesterase, putative( EC:1.7.- )	0	0	0	0	1	1	0	1	0	0	0	1	1	0	1	1	1	1	1
	ORTHOMCL5044	Transcriptional regulator	0	0	0	0	1	1	0	1	0	0	0	1	1	0	1	1	1	1	1
	ORTHOMCL3883	senescence marker protein-30 family protein	0	0	0	0	1	1	0	2	1	0	2	1	0	1	1	2	1	1	1
	ORTHOMCL4193	universal stress protein family	0	0	0	0	1	1	0	0	1	0	1	1	2	0	1	1	2	1	2
	ORTHOMCL5431	acetaldehyde dehydrogenase (acetylating)( EC:1.2.1.10 )	1	1	1	1	0	0	0	1	1	1	1	1	0	1	0	0	0	0	0
	ORTHOMCL4351	branched-chain amino acid ABC transporter, permease protein	0	0	0	0	0	0	0	1	0	0	1	1	1	0	1	1	1	1	1
	ORTHOMCL5243	hypothetical protein	0	0	0	0	1	1	1	1	0	0	0	1	1	0	1	1	0	0	1
	ORTHOMCL5247	hypothetical protein	0	0	0	0	1	1	1	1	0	0	1	1	0	1	1	1	0	0	1
	ORTHOMCL5422	hypothetical protein	0	0	0	0	1	1	1	1	0	0	0	1	1	0	1	1	0	0	1
	ORTHOMCL5622	Hydroxypyruvate isomerase( EC:5.3.1.22 )	0	0	0	0	1	1	0	0	1	1	0	1	1	1	0	1	1	0	1
	ORTHOMCL4359	Uncharacterized protein conserved in bacteria	0	0	0	0	1	1	0	1	1	0	2	1	0	1	0	0	1	1	2
	ORTHOMCL5363	Dioxygenases related to 2-nitropropane dioxygenase( EC:1.13.12.16 )	1	1	1	1	0	0	0	0	1	1	1	0	0	2	0	0	0	0	0
	ORTHOMCL4271	exopolysaccharide production protein ExoZ, putative	1	1	1	1	1	1	1	1	1	0	0	0	0	0	0	0	0	1	1
	ORTHOMCL5224	4-hydroxy-2-oxovalerate aldolase( EC:4.1.3.39 )	1	1	1	1	0	0	0	1	1	1	1	1	0	1	0	0	0	0	0
	ORTHOMCL4220	sensor histidine kinase QseC, putative( EC:2.7.13.3 )	0	0	0	0	1	1	1	0	1	0	1	0	0	1	0	0	1	1	0
	ORTHOMCL4521	hypothetical protein	0	0	0	0	0	0	0	0	0	0	1	1	1	0	1	1	1	1	1
	ORTHOMCL4522	branched-chain amino acid ABC transporter, permease protein	0	0	0	0	0	0	0	0	0	0	1	1	1	0	1	1	1	1	1
	ORTHOMCL4523	branched-chain amino acid ABC transporter, ATP-binding protein	0	0	0	0	0	0	0	0	0	0	1	1	1	0	1	1	1	1	1
	ORTHOMCL4678	ankyrin AnkB	0	0	0	0	1	1	1	1	0	0	0	1	1	0	0	1	0	0	1
	ORTHOMCL4724	transcriptional regulator, GntR family	0	0	0	0	0	0	0	0	0	0	1	1	1	0	1	1	1	1	1
	ORTHOMCL4892	aldose 1-epimerase family protein	0	0	0	0	0	0	0	0	1	1	1	1	0	1	1	1	1	1	0
	ORTHOMCL4896	branched-chain amino acid ABC transporter, ATP-binding protein	0	0	0	0	0	0	0	0	0	0	1	1	1	0	1	1	1	1	1
	ORTHOMCL5483	molybdenum-pterin binding domain	0	0	0	0	0	0	0	0	0	0	1	1	0	1	1	1	1	1	1
	ORTHOMCL5603	Flp pilus assembly protein, pilin Flp	0	0	0	0	0	0	0	1	1	0	1	1	1	0	1	1	0	0	1
	ORTHOMCL5650	Protein of unknown function (DUF1696).	0	0	0	0	1	1	0	1	0	0	1	0	0	1	1	0	1	1	0
	ORTHOMCL5919	hypothetical protein	0	0	0	0	1	1	1	1	0	0	0	1	1	0	1	1	1	0	0
	ORTHOMCL4038	bacterial luciferase family protein	0	0	0	0	2	2	1	0	1	0	2	0	1	0	2	1	1	1	0
	ORTHOMCL4699	PAS domain S-box/diguanylate cyclase (GGDEF) domain	0	0	0	0	1	1	1	1	0	0	0	1	1	0	2	1	0	0	1
	ORTHOMCL5267	hypothetical protein	0	0	0	0	0	0	0	1	0	0	1	1	1	1	2	1	1	0	1
	ORTHOMCL5632	hypothetical protein	0	0	0	0	1	1	1	1	0	0	1	1	0	0	1	1	0	0	2
	ORTHOMCL4146	Amino acid transporters	1	1	1	1	1	1	1	0	0	1	0	0	1	0	1	0	1	1	0
	ORTHOMCL4198	Glycine/D-amino acid oxidases (deaminating)( EC:1.4.99.1 )	1	1	1	1	0	0	1	0	1	0	1	1	0	0	1	1	0	0	1
	ORTHOMCL5046	EF hand domain protein	0	0	0	0	1	1	1	1	0	0	0	1	1	0	0	0	1	0	1
	ORTHOMCL5328	rhomboid family protein	0	0	0	0	0	0	0	0	0	0	0	1	1	1	0	1	1	1	1
	ORTHOMCL5394	D-galactose 1-dehydrogenase( EC:1.1.1.48 )	0	0	0	0	1	1	1	1	0	0	0	0	0	1	0	0	1	1	0
	ORTHOMCL5418	hypothetical protein	0	0	0	0	0	0	0	0	1	0	0	1	1	1	0	1	1	1	1
	ORTHOMCL5447	hypothetical protein	0	0	0	0	0	0	0	0	1	1	1	1	0	1	0	0	1	1	1
	ORTHOMCL5448	Predicted transcriptional regulator	0	0	0	0	0	0	0	1	0	0	1	1	0	0	1	1	1	1	1
	ORTHOMCL5477	hypothetical protein	0	0	0	0	1	1	0	0	1	0	1	0	0	1	0	0	1	1	0
	ORTHOMCL5478	Short-chain dehydrogenases of various substrate specificities	0	0	0	0	1	1	0	0	1	0	1	0	0	1	0	0	1	1	0
	ORTHOMCL5489	sorbitol dehydrogenase( EC:1.1.99.21,EC:1.1.1.14 )	0	0	0	0	1	1	0	0	1	0	0	1	1	0	1	1	0	0	1
	ORTHOMCL5608	Predicted transcriptional regulators	0	0	0	0	0	0	0	0	0	0	0	1	1	0	1	1	1	1	1
	ORTHOMCL5630	Universal stress protein UspA and related nucleotide-binding proteins	0	0	0	0	0	0	0	0	1	0	1	1	1	0	0	1	1	0	1
	ORTHOMCL5635	RNA polymerase sigma factor, sigma-70 family	0	0	0	0	1	1	1	1	0	0	0	1	0	0	0	1	1	0	0
	ORTHOMCL5677	Deacetylases, including yeast histone deacetylase and acetoin utilization protein	0	0	0	0	1	1	0	1	1	0	0	1	0	0	1	1	0	0	1
	ORTHOMCL5709	Putative threonine efflux protein	0	0	0	0	0	0	0	1	1	0	1	0	1	0	0	1	1	1	1
	ORTHOMCL5844	queuosine biosynthesis protein QueC	0	0	0	0	1	1	0	0	1	0	1	0	0	1	1	1	0	0	0
	ORTHOMCL5853	Uncharacterized conserved protein( EC:1.13.11.8 )	0	0	0	0	1	1	0	1	1	0	1	0	0	1	0	0	0	0	1
	ORTHOMCL5854	Transcriptional regulator	0	0	0	0	1	1	0	1	1	0	1	0	0	1	0	0	0	0	1
	ORTHOMCL5855	Uncharacterized proteins, LmbE homologs	0	0	0	0	1	1	0	1	1	0	1	0	0	1	0	0	0	0	1
	ORTHOMCL5865	Putative intracellular protease/amidase	0	0	0	0	0	0	1	0	1	1	1	0	1	0	0	0	1	1	0
	ORTHOMCL5866	Transcriptional regulator	0	0	0	0	0	0	1	0	1	1	1	0	1	0	0	0	1	1	0
	ORTHOMCL5907	potassium channel protein, putative	0	0	0	0	0	0	0	0	0	0	0	1	1	1	0	1	1	1	1
	ORTHOMCL6083	hypothetical protein	0	0	0	0	1	1	1	1	0	0	1	0	0	1	1	0	1	0	0
	ORTHOMCL6128	Sugar phosphate permease	0	0	0	0	1	1	0	1	1	0	1	0	0	1	0	0	0	0	1
	ORTHOMCL6172	hypothetical protein	0	0	0	0	0	0	0	0	1	0	1	1	1	1	1	1	0	0	1
	ORTHOMCL6199	hypothetical protein	0	0	0	0	1	1	1	1	0	0	0	1	0	0	1	1	1	0	0
	ORTHOMCL6200	hypothetical protein	0	0	0	0	1	1	1	1	0	0	0	1	0	0	1	1	1	0	0
	ORTHOMCL4106	vanillate monooxygenase, oxygenase subunit( EC:1.14.13.82 )	0	0	0	0	1	1	0	1	0	0	1	1	1	3	0	1	0	0	1
	ORTHOMCL5274	outer membrane porin	0	0	0	0	0	0	0	0	1	0	0	2	1	1	0	1	1	0	1
	ORTHOMCL5612	Dienelactone hydrolase and related enzymes( EC:3.1.1.45 )	0	0	0	0	0	0	0	0	0	0	0	2	1	1	1	1	1	1	1
	ORTHOMCL5892	hypothetical protein	0	0	0	0	1	1	1	1	0	0	0	2	0	1	0	1	0	0	1
	ORTHOMCL5457	Permeases of the drug/metabolite transporter (DMT) superfamily	0	0	0	0	1	1	0	2	1	0	0	0	1	0	1	1	0	0	2
	ORTHOMCL5008	Uncharacterized conserved protein	0	0	0	0	2	2	1	1	0	0	0	1	1	0	0	2	0	0	0
	ORTHOMCL4121	Uncharacterized membrane protein	1	1	1	1	1	1	1	1	1	1	0	0	0	0	0	0	1	1	0
	ORTHOMCL4156	Radical SAM	1	1	1	1	0	0	0	0	1	1	1	0	1	1	1	0	1	1	0
	ORTHOMCL4274	Type II secretory pathway, ATPase PulE/Tfp pilus assembly pathway, ATPase PilB	1	1	1	1	1	1	0	1	1	1	1	0	0	1	0	0	1	1	0
	ORTHOMCL4280	ABC-type multidrug transport system, ATPase and permease components	1	1	1	1	0	0	0	0	1	1	1	0	1	1	1	0	1	1	0
	ORTHOMCL4287	Quinohemoprotein amine dehydrogenase, gamma subunit.	1	1	1	1	0	0	0	0	1	1	1	0	1	1	1	0	1	1	0
	ORTHOMCL4400	Type II secretory pathway, component PulF	1	1	1	1	1	1	0	1	1	1	1	0	0	1	0	0	1	1	0
	ORTHOMCL4401	general secretion pathway protein G	1	1	1	1	1	1	0	1	1	1	1	0	0	1	0	0	1	1	0
	ORTHOMCL4403	Response regulator containing CheY-like receiver, AAA-type ATPase, and DNA-binding domains	1	1	1	1	1	1	0	1	1	1	1	0	0	1	0	0	1	1	0
	ORTHOMCL4404	Signal transduction histidine kinase	1	1	1	1	1	1	0	1	1	1	1	0	0	1	0	0	1	1	0
	ORTHOMCL4405	Uncharacterized protein SCO1/SenC/PrrC, involved in biogenesis of respiratory and photosynthetic systems	1	1	1	1	1	1	0	1	1	1	1	0	0	1	0	0	1	1	0
	ORTHOMCL4412	hypothetical protein	1	1	1	1	1	1	0	1	1	1	1	0	0	1	0	0	1	1	0
	ORTHOMCL4413	Signal transduction histidine kinase	1	1	1	1	1	1	0	1	1	1	1	0	0	1	0	0	1	1	0
	ORTHOMCL4414	hypothetical protein	1	1	1	1	1	1	0	1	1	1	1	0	0	1	0	0	1	1	0
	ORTHOMCL4415	prepilin-type N-terminal cleavage/methylation domain	1	1	1	1	1	1	0	1	1	1	1	0	0	1	0	0	1	1	0
	ORTHOMCL4416	prepilin-type N-terminal cleavage/methylation domain	1	1	1	1	1	1	0	1	1	1	1	0	0	1	0	0	1	1	0
	ORTHOMCL4417	Type II secretory pathway, component HofQ	1	1	1	1	1	1	0	1	1	1	1	0	0	1	0	0	1	1	0
	ORTHOMCL4418	General secretion pathway protein M.	1	1	1	1	1	1	0	1	1	1	1	0	0	1	0	0	1	1	0
	ORTHOMCL4419	Fimbrial assembly protein (PilN).	1	1	1	1	1	1	0	1	1	1	1	0	0	1	0	0	1	1	0
	ORTHOMCL4420	hypothetical protein	1	1	1	1	1	1	0	1	1	1	1	0	0	1	0	0	1	1	0
	ORTHOMCL4421	Response regulator containing a CheY-like receiver domain and an HD-GYP domain	1	1	1	1	1	1	0	1	1	1	1	0	0	1	0	0	1	1	0
	ORTHOMCL4422	ABC-type branched-chain amino acid transport systems, periplasmic component	1	1	1	1	1	1	0	1	1	1	1	0	0	1	0	0	1	1	0
	ORTHOMCL4423	Uncharacterized protein SCO1/SenC/PrrC, involved in biogenesis of respiratory and photosynthetic systems	1	1	1	1	1	1	0	1	1	1	1	0	0	1	0	0	1	1	0
	ORTHOMCL4424	Uncharacterized protein SCO1/SenC/PrrC, involved in biogenesis of respiratory and photosynthetic systems	1	1	1	1	1	1	0	1	1	1	1	0	0	1	0	0	1	1	0
	ORTHOMCL4425	Predicted soluble lytic transglycosylase fused to an ABC-type amino acid-binding protein	1	1	1	1	1	1	0	1	1	1	1	0	0	1	0	0	1	1	0
	ORTHOMCL4438	Dehydrogenases (flavoproteins)	1	1	1	1	0	0	0	0	1	1	1	0	1	1	1	0	1	1	0
	ORTHOMCL4439	hypothetical protein	1	1	1	1	0	0	0	0	1	1	1	0	1	1	1	0	1	1	0
	ORTHOMCL4440	Transcriptional activator of acetoin/glycerol metabolism	1	1	1	1	0	0	0	0	1	1	1	0	1	1	1	0	1	1	0
	ORTHOMCL4452	quinohemoprotein amine dehydrogenase, alpha subunit	1	1	1	1	0	0	0	0	1	1	1	0	1	1	1	0	1	1	0
	ORTHOMCL4577	hypothetical protein	1	1	1	1	1	1	0	1	1	1	1	0	0	1	0	0	1	1	0
	ORTHOMCL4893	TRAP dicarboxylate transporter, DctP subunit	0	0	0	0	1	1	0	1	0	0	1	1	0	1	0	1	0	0	0
	ORTHOMCL4895	acyl-CoA dehydrogenase family protein	0	0	0	0	0	0	0	0	0	0	1	1	0	0	1	1	1	1	0
	ORTHOMCL5061	TRAP dicarboxylate transporter, DctQ subunit, putative	0	0	0	0	1	1	0	1	0	0	1	1	0	1	0	1	0	0	0
	ORTHOMCL5102	lipoprotein, putative	0	0	0	0	1	1	1	0	0	0	0	1	1	0	0	1	0	0	0
	ORTHOMCL5279	ABC transporter, ATP-binding protein	0	0	0	0	0	0	0	0	0	0	0	1	1	1	0	1	1	1	0
	ORTHOMCL5340	threonine efflux protein	0	0	0	0	1	1	1	1	0	0	0	0	0	0	1	0	1	1	0
	ORTHOMCL5465	hypothetical protein	0	0	0	0	0	0	0	0	0	0	1	1	0	0	1	1	1	1	0
	ORTHOMCL5474	hypothetical protein	0	0	0	0	1	1	1	0	1	1	0	1	1	0	0	0	0	0	0
	ORTHOMCL5543	Transcriptional regulator	0	0	0	0	0	0	0	0	1	1	1	0	0	1	0	0	1	1	1
	ORTHOMCL5670	Acyl-CoA synthetases (AMP-forming)/AMP-acid ligases II	0	0	0	0	0	0	0	0	0	0	1	1	0	0	1	1	1	1	0
	ORTHOMCL5673	Thioredoxin reductase	0	0	0	0	1	1	0	0	0	0	0	1	0	0	0	1	1	1	1
	ORTHOMCL5793	hypothetical protein	0	0	0	0	0	0	0	0	1	1	1	0	0	1	1	0	1	1	0
	ORTHOMCL5795	Uncharacterized protein conserved in bacteria	0	0	0	0	0	0	0	0	1	1	1	0	0	1	0	0	1	1	1
	ORTHOMCL5822	hypothetical protein	0	0	0	0	0	0	0	0	1	1	1	0	0	1	1	0	1	1	0
	ORTHOMCL5823	virulence protein SrfB	0	0	0	0	0	0	0	0	1	1	1	0	0	1	1	0	1	1	0
	ORTHOMCL5824	type III effector HopL1	0	0	0	0	0	0	0	0	1	1	1	0	0	1	1	0	1	1	0
	ORTHOMCL5825	hypothetical protein	0	0	0	0	0	0	0	0	1	1	1	0	0	1	1	0	1	1	0
	ORTHOMCL5826	lipoprotein, putative	0	0	0	0	0	0	0	0	1	1	1	0	0	1	1	0	1	1	0
	ORTHOMCL5827	lipoprotein, putative	0	0	0	0	0	0	0	0	1	1	1	0	0	1	1	0	1	1	0
	ORTHOMCL5837	AraC-like ligand binding domain.	0	0	0	0	1	1	1	1	0	0	1	0	1	0	0	0	1	0	0
	ORTHOMCL5838	Arabinose efflux permease	0	0	0	0	1	1	1	1	0	0	1	0	1	0	0	0	1	0	0
	ORTHOMCL5863	hypothetical protein	0	0	0	0	1	1	0	0	0	0	0	0	0	1	1	1	0	0	1
	ORTHOMCL5901	Hemolysin-type calcium-binding repeat (2 copies).	0	0	0	0	1	1	1	1	0	0	0	1	0	0	1	1	0	0	0
	ORTHOMCL5905	Ketosteroid isomerase-related protein	0	0	0	0	0	0	0	0	0	0	0	1	1	0	0	1	1	1	1
	ORTHOMCL5930	Transcriptional regulator	0	0	0	0	0	0	1	0	0	0	0	1	1	0	1	0	1	1	0
	ORTHOMCL6061	Pyridoxal phosphate biosynthesis protein( EC:1.1.1.262 )	0	0	0	0	0	0	0	0	1	1	1	0	0	1	0	0	1	1	1
	ORTHOMCL6062	Predicted metal-dependent hydrolase of the TIM-barrel fold	0	0	0	0	0	0	0	0	1	1	1	0	0	1	0	0	1	1	1
	ORTHOMCL6063	Uncharacterized protein conserved in bacteria	0	0	0	0	0	0	0	0	1	1	1	0	0	1	0	0	1	1	1
	ORTHOMCL6064	Tripartite tricarboxylate transporter TctB family.	0	0	0	0	0	0	0	0	1	1	1	0	0	1	0	0	1	1	1
	ORTHOMCL6165	Sugar phosphate isomerases/epimerases	0	0	0	0	1	1	0	0	0	0	1	1	0	0	0	1	0	0	1
	ORTHOMCL6183	arginine N-succinyltransferase( EC:2.3.1.109 )	0	0	0	0	0	0	0	0	0	0	0	1	1	0	1	1	1	1	1
	ORTHOMCL6196	hypothetical protein	0	0	0	0	1	1	1	1	0	1	0	1	0	0	0	1	0	0	0
	ORTHOMCL6231	Sugar phosphate permease	0	0	0	0	0	0	0	0	1	0	1	0	0	1	1	0	1	1	1
	ORTHOMCL6284	Uncharacterized conserved small protein	0	0	0	0	0	0	0	0	0	0	0	1	0	0	1	1	1	1	1
	ORTHOMCL6395	hypothetical protein	0	0	0	0	1	1	1	0	0	0	0	0	1	1	1	0	0	0	1
	ORTHOMCL6464	hypothetical protein	0	0	0	0	0	1	0	1	0	0	0	1	0	0	1	1	1	0	1
	ORTHOMCL6475	Response regulators consisting of a CheY-like receiver domain and a winged-helix DNA-binding domain	0	0	0	0	0	0	0	0	0	0	0	1	0	1	1	1	1	1	1
	ORTHOMCL6483	Uncharacterized protein, possibly involved in glyoxylate utilization	0	0	0	0	0	0	0	0	0	0	1	1	0	0	1	1	1	1	1
	ORTHOMCL6487	hypothetical protein	0	0	0	0	0	0	0	0	0	0	0	1	0	1	1	1	1	1	1
	ORTHOMCL4954	Alkyl sulfatase and related hydrolases	1	1	1	2	0	0	0	0	2	0	1	0	0	1	0	0	0	0	0
	ORTHOMCL5125	oxidoreductase, short chain dehydrogenase/reductase family	1	1	2	1	0	0	0	0	1	1	1	0	0	1	0	0	0	0	0
	ORTHOMCL4705	transcriptional regulator VanR, putative	0	0	0	0	0	0	0	0	0	0	1	1	1	2	0	1	0	0	1
	ORTHOMCL4769	acetyltransferase, GNAT family	0	0	0	0	1	1	0	0	1	0	0	0	1	0	0	0	1	0	1
	ORTHOMCL5070	vanillin dehydrogenase	0	0	0	0	1	1	0	0	1	0	0	1	1	0	0	2	0	0	1
	ORTHOMCL5557	hypothetical protein	0	0	0	0	0	0	1	0	1	0	1	0	1	2	0	1	0	0	1
	ORTHOMCL5879	Uncharacterized protein related to plant photosystem II stability/assembly factor	0	0	0	0	1	1	0	0	0	0	0	1	1	2	1	1	0	0	0
	ORTHOMCL4528	prophage PSPPH03, host specificity protein J, truncated	0	0	0	0	0	0	1	1	0	0	2	0	1	0	0	0	2	1	1
	ORTHOMCL4315	Protein of unknown function (DUF2950).	1	1	1	1	0	0	0	0	1	1	1	1	0	1	1	1	1	1	1
	ORTHOMCL4388	Sugar phosphate permease	1	1	1	1	0	0	0	1	1	1	1	1	1	0	1	1	1	1	0
	ORTHOMCL4455	Spermidine/putrescine-binding periplasmic protein	1	1	1	1	0	0	1	1	1	1	1	1	0	1	1	0	1	1	0
	ORTHOMCL4456	Glycine/D-amino acid oxidases (deaminating)	1	1	1	1	0	0	1	1	1	1	1	1	0	1	1	0	1	1	0
	ORTHOMCL4457	Transcriptional regulator	1	1	1	1	0	0	1	1	1	1	1	1	0	1	1	0	1	1	0
	ORTHOMCL4707	conserved hypothetical protein, putative DNA helicase	0	0	0	0	0	0	1	1	1	0	1	0	0	0	0	1	0	0	1
	ORTHOMCL4956	hypothetical protein	0	0	0	0	0	0	1	0	1	0	1	0	1	1	1	0	0	0	0
	ORTHOMCL5104	transcriptional regulator, LysR family	0	0	0	0	1	1	0	0	1	0	1	0	0	0	0	1	0	0	0
	ORTHOMCL5108	acid phosphatase	0	0	0	0	1	1	1	1	0	0	0	0	1	0	0	0	0	0	0
	ORTHOMCL5322	xanthine/uracil permease family protein	0	0	0	0	1	1	1	1	0	0	0	0	0	1	0	0	0	0	0
	ORTHOMCL5417	hypothetical protein	0	0	0	0	1	1	1	1	0	0	0	1	1	0	0	0	0	0	0
	ORTHOMCL5453	sulfatase family protein	0	0	0	0	0	0	1	0	0	0	1	0	0	1	1	0	1	1	0
	ORTHOMCL5454	hypothetical protein	0	0	0	0	0	0	1	0	0	0	1	0	0	1	1	0	1	1	0
	ORTHOMCL5455	BNR/Asp-box repeat protein	0	0	0	0	0	0	1	0	0	0	1	0	0	1	1	0	1	1	0
	ORTHOMCL5460	esterase, putative	0	0	0	0	1	1	1	1	0	0	0	1	0	0	0	0	0	0	0
	ORTHOMCL5480	Phage tail tape measure protein lambda	0	0	0	0	0	0	1	1	0	0	0	0	1	0	0	0	1	1	1
	ORTHOMCL5625	0	0	0	0	0	1	1	0	0	1	1	0	1	0	0	0	1	0	0	0
	ORTHOMCL5661	hypothetical protein	0	0	0	0	0	0	0	0	0	1	1	1	1	0	1	0	0	0	1
	ORTHOMCL5662	acetyltransferase, GNAT family	0	0	0	0	0	0	0	0	0	1	1	1	1	0	1	0	0	0	1
	ORTHOMCL5663	hypothetical protein	0	0	0	0	0	0	0	0	0	1	1	1	1	0	1	0	0	0	1
	ORTHOMCL5664	pyridine nucleotide-disulphide oxidoreductase family protein	0	0	0	0	0	0	0	0	0	1	1	1	1	0	1	0	0	0	1
	ORTHOMCL5665	oxidoreductase, FAD-binding	0	0	0	0	0	0	0	0	0	1	1	1	1	0	1	0	0	0	1
	ORTHOMCL5666	acetylornithine deacetylase (ArgE)( EC:3.5.1.16 )	0	0	0	0	0	0	0	0	0	1	1	1	1	0	1	0	0	0	1
	ORTHOMCL5667	4-aminobutyrate transaminase( EC:2.6.1.19,EC:2.6.1.22 )	0	0	0	0	0	0	0	0	0	1	1	1	1	0	1	0	0	0	1
	ORTHOMCL5668	hypothetical protein	0	0	0	0	0	0	0	0	0	1	1	1	1	0	1	0	0	0	1
	ORTHOMCL5687	NLP/P60	0	0	0	0	0	0	1	1	0	0	0	0	1	0	0	0	1	1	1
	ORTHOMCL5688	Phage minor tail protein L	0	0	0	0	0	0	1	1	0	0	0	0	1	0	0	0	1	1	1
	ORTHOMCL5689	Phage minor tail	0	0	0	0	0	0	1	1	0	0	0	0	1	0	0	0	1	1	1
	ORTHOMCL5802	shufflon-specific recombinase	0	0	0	0	0	0	0	1	1	0	0	0	0	1	1	1	1	0	0
	ORTHOMCL5872	outer membrane efflux protein	0	0	0	0	0	0	0	0	0	0	1	1	1	0	0	1	0	0	1
	ORTHOMCL5873	HlyD family secretion protein	0	0	0	0	0	0	0	0	0	0	1	1	1	0	0	1	0	0	1
	ORTHOMCL5882	1-aminocyclopropane-1-carboxylate deaminase( EC:3.5.99.7 )	0	0	0	0	0	0	0	0	0	1	0	1	1	0	0	0	1	1	1
	ORTHOMCL5886	hypothetical protein	0	0	0	0	1	1	1	1	0	0	0	1	1	0	0	0	0	0	0
	ORTHOMCL5940	FAD dependent oxidoreductase	0	0	0	0	0	0	0	0	0	1	1	1	1	0	1	0	0	0	1
	ORTHOMCL5941	Succinic semialdehyde dehydrogenase( EC:1.2.1.16 )	0	0	0	0	0	0	0	0	0	1	1	1	1	0	1	0	0	0	1
	ORTHOMCL5958	outer membrane porin, OprD family.	0	0	0	0	0	0	0	0	1	0	1	1	0	0	0	0	1	1	1
	ORTHOMCL5962	Bacteriophage Lambda NinG	0	0	0	0	0	0	1	1	0	1	0	0	1	0	0	0	0	1	1
	ORTHOMCL5972	Glyoxalase/Bleomycin resistance protein/Dioxygenase superfamily.	0	0	0	0	1	1	0	1	0	0	1	0	0	1	0	0	0	0	0
	ORTHOMCL6159	Alkaline protease secretion ATP-binding protein aprD	0	0	0	0	0	0	0	0	0	0	1	1	1	0	0	1	0	0	1
	ORTHOMCL6203	hypothetical protein	0	0	0	0	1	1	0	0	1	0	0	0	0	1	1	0	0	1	0
	ORTHOMCL6206	Predicted transcriptional regulators	0	0	0	0	1	1	1	0	0	0	1	1	0	1	0	0	0	0	0
	ORTHOMCL6236	Helix-turn-helix, AraC type	0	0	0	0	1	1	0	0	1	0	0	0	0	0	1	1	0	0	1
	ORTHOMCL6237	Cytochrome B561	0	0	0	0	1	1	1	0	0	0	0	0	0	0	0	0	1	1	1
	ORTHOMCL6377	Transcriptional regulator	0	0	0	0	1	1	0	1	1	0	1	0	0	1	0	0	0	0	0
	ORTHOMCL6378	monooxygenase, flavin-binding family( EC:1.14.13.8 )	0	0	0	0	1	1	0	0	1	0	1	0	0	1	0	1	0	0	0
	ORTHOMCL6419	Predicted transcriptional regulators	0	0	0	0	1	1	0	0	1	0	1	0	0	0	0	1	0	0	0
	ORTHOMCL6420	conserved hypothetical integral membrane protein	0	0	0	0	1	1	0	0	1	0	1	0	0	0	0	1	0	0	0
	ORTHOMCL6455	pyruvate dehydrogenase E1 component, alpha subunit( EC:1.2.4.1 )	0	0	0	0	0	0	0	0	0	0	0	1	1	0	1	1	0	0	1
	ORTHOMCL6456	Pyruvate/2-oxoglutarate dehydrogenase complex, dehydrogenase (E1) component, eukaryotic type, beta subunit( EC:1.2.4.1 )	0	0	0	0	0	0	0	0	0	0	0	1	1	0	1	1	0	0	1
	ORTHOMCL6457	Pyruvate/2-oxoglutarate dehydrogenase complex, dihydrolipoamide acyltransferase (E2) component, and related enzymes( EC:2.3.1.12 )	0	0	0	0	0	0	0	0	0	0	0	1	1	0	1	1	0	0	1
	ORTHOMCL6466	hypothetical protein	0	0	0	0	1	1	0	1	0	0	0	1	1	0	0	1	0	0	0
	ORTHOMCL6467	hypothetical protein	0	0	0	0	1	1	0	1	0	0	0	1	1	0	0	1	0	0	0
	ORTHOMCL6470	Erythromycin esterase homolog	0	0	0	0	0	0	0	0	0	0	0	1	1	0	1	1	0	0	1
	ORTHOMCL6488	Molecular chaperone (small heat shock protein)	0	0	0	0	0	0	0	0	0	0	0	1	1	0	1	1	0	0	1
	ORTHOMCL6492	hypothetical protein	0	0	0	0	0	0	0	1	0	0	0	0	0	1	1	0	1	1	0
	ORTHOMCL6512	Predicted thioesterase	0	0	0	0	0	0	1	0	0	0	0	1	0	0	1	1	0	0	1
	ORTHOMCL6523	Transcriptional regulator	0	0	0	0	1	1	1	1	0	0	0	0	1	0	0	0	0	0	1
	ORTHOMCL6627	hypothetical protein	0	0	0	0	1	1	0	1	0	0	0	0	0	0	0	1	1	1	0
	ORTHOMCL6739	hypothetical protein	0	0	0	0	1	1	1	0	0	0	0	0	0	1	1	0	0	0	1
	ORTHOMCL6746	Zn-dependent alcohol dehydrogenases, class III( EC:1.1.1.90 )	0	0	0	0	1	1	0	0	1	0	0	0	0	1	0	1	1	0	0
	ORTHOMCL6750	hypothetical protein	0	0	0	0	0	0	0	0	0	0	1	0	0	1	1	1	1	1	0
	ORTHOMCL6767	hypothetical protein	0	0	0	0	1	0	0	1	0	1	0	0	1	0	0	0	1	1	0
	ORTHOMCL6775	Predicted nucleoside-diphosphate-sugar epimerases	0	0	0	0	0	0	0	1	0	1	0	0	1	1	1	0	0	0	1
	ORTHOMCL6850	Transcriptional regulators	0	0	0	0	1	1	0	0	0	0	1	1	0	0	0	1	0	0	1
	ORTHOMCL6851	Nucleoside H+ symporter.	0	0	0	0	1	1	0	0	0	0	1	1	0	0	0	1	0	0	1
	ORTHOMCL6853	hypothetical protein	0	0	0	0	0	0	0	0	0	0	0	1	1	0	1	1	0	0	1
	ORTHOMCL6854	hypothetical protein	0	0	0	0	0	0	0	0	0	0	1	1	1	0	0	0	1	0	1
	ORTHOMCL6855	Uncharacterized protein conserved in bacteria	0	0	0	0	1	1	0	0	1	0	0	1	0	1	0	0	0	0	0
	ORTHOMCL6859	hypothetical protein	0	0	0	0	1	1	0	0	0	0	0	1	1	1	0	1	0	0	0
	ORTHOMCL6866	hypothetical protein	0	0	0	0	0	0	0	0	0	0	1	1	1	1	0	1	0	0	1
	ORTHOMCL6880	hypothetical protein	0	0	0	0	1	1	1	0	0	0	0	1	0	0	1	1	0	0	0
	ORTHOMCL6881	hypothetical protein	0	0	0	0	1	1	0	0	0	1	1	1	0	1	0	0	0	0	0
	ORTHOMCL6882	hypothetical protein	0	0	0	0	1	1	0	0	0	1	1	1	0	1	0	0	0	0	0
	ORTHOMCL6894	Cytotoxic./S-type Pyocin.	0	0	0	0	1	1	0	0	0	0	0	1	0	0	0	0	1	1	0
	ORTHOMCL4753	acetyl-CoA acetyltransferases( EC:2.3.1.9 )	1	1	1	1	0	0	0	0	1	1	2	0	0	1	1	0	0	0	0
	ORTHOMCL2567	hypothetical protein	0	0	0	0	2	2	0	1	1	0	1	1	1	0	1	1	1	1	1
	ORTHOMCL3023	NADH:flavin oxidoreductase/NADH oxidase	0	1	0	0	2	2	1	3	1	2	2	0	0	0	0	0	1	1	1
	ORTHOMCL4475	Predicted membrane protein	1	1	1	1	0	0	1	0	1	1	0	1	0	0	0	2	1	1	0
	ORTHOMCL6373	hypothetical protein	0	0	0	0	1	1	0	0	0	0	0	0	0	2	0	1	1	1	0
	ORTHOMCL6477	PAS domain S-box( EC:2.1.1.80,EC:3.1.1.61 )	0	0	0	0	0	0	0	0	0	0	2	1	0	0	1	0	1	1	1
	ORTHOMCL4355	benzaldehyde dehydrogenase (NAD+)( EC:1.2.1.28 )	0	0	0	0	0	0	0	0	0	0	1	2	1	0	0	2	2	0	0
	ORTHOMCL5508	Arabinose efflux permease	0	0	0	0	1	1	0	1	0	0	0	1	0	2	0	2	0	0	0
	ORTHOMCL3524	hypothetical protein	0	1	0	0	1	1	0	0	1	0	1	3	3	2	0	4	0	0	1
	ORTHOMCL6974	Predicted acid phosphatase( EC:3.1.3.5 )	1	1	1	1	0	0	0	0	1	0	0	0	0	0	0	0	0	0	0
	ORTHOMCL7225	hypothetical protein	1	1	1	1	0	0	0	0	1	0	0	0	0	0	0	0	0	0	0
	ORTHOMCL7230	hypothetical protein	1	1	1	1	0	0	0	0	0	1	0	0	0	0	0	0	0	0	0
	ORTHOMCL7256	Coenzyme F420-dependent N5,N10-methylene tetrahydromethanopterin reductase and related flavin-dependent oxidoreductases( EC:1.14.14.3 )	1	1	1	1	0	0	0	0	1	0	0	0	0	0	0	0	0	0	0
	ORTHOMCL7257	Dehydrogenases with different specificities (related to short-chain alcohol dehydrogenases)	1	1	1	1	0	0	0	0	1	0	0	0	0	0	0	0	0	0	0
	ORTHOMCL7258	3,4-dihydroxy-2-butanone 4-phosphate synthase( EC:4.1.99.12,EC:3.5.4.25 )	1	1	1	1	0	0	0	0	1	0	0	0	0	0	0	0	0	0	0
	ORTHOMCL7259	Short-chain alcohol dehydrogenase of unknown specificity	1	1	1	1	0	0	0	0	1	0	0	0	0	0	0	0	0	0	0
	ORTHOMCL7260	hypothetical protein	1	1	1	1	0	0	0	0	1	0	0	0	0	0	0	0	0	0	0
	ORTHOMCL7261	Polyketide cyclase / dehydrase and lipid transport.	1	1	1	1	0	0	0	0	1	0	0	0	0	0	0	0	0	0	0
	ORTHOMCL7262	Nuclear transport factor 2 (NTF2) domain.( EC:5.3.3.1 )	1	1	1	1	0	0	0	0	1	0	0	0	0	0	0	0	0	0	0
	ORTHOMCL7265	formaldehyde-activating enzyme( EC:4.3.- )	1	1	1	1	0	0	0	0	0	0	0	0	0	0	0	0	0	1	0
	ORTHOMCL7266	Transcriptional regulator	1	1	1	1	0	0	0	0	0	0	0	0	0	0	0	0	0	1	0
	ORTHOMCL7267	Transcriptional regulator	1	1	1	1	0	0	0	0	0	0	0	0	0	0	0	0	0	1	0
	ORTHOMCL7268	Sugar phosphate permease	1	1	1	1	0	0	0	0	0	0	0	0	0	0	0	0	0	1	0
	ORTHOMCL7269	L-alanine-DL-glutamate epimerase and related enzymes of enolase superfamily( EC:4.1.2.21 )	1	1	1	1	0	0	0	0	0	0	0	0	0	0	0	0	0	1	0
	ORTHOMCL7270	Choline dehydrogenase and related flavoproteins( EC:1.1.99.1 )	1	1	1	1	0	0	0	0	0	0	0	0	0	0	0	0	0	1	0
	ORTHOMCL4567	Cytosine deaminase and related metal-dependent hydrolases( EC:3.5.99.4,EC:3.5.4.1 )	1	1	2	1	0	0	1	1	1	1	1	0	0	0	1	0	1	1	0
	ORTHOMCL3393	TonB-dependent outer membrane heme receptor	1	1	1	1	1	1	1	1	0	1	1	1	0	0	0	1	1	1	0
	ORTHOMCL3771	phosphoesterase, putative	1	1	1	1	0	0	0	1	1	1	1	1	0	1	1	1	1	1	0
	ORTHOMCL4047	Threonine dehydratase	1	1	1	1	0	0	0	0	1	1	0	1	1	1	1	1	1	1	1
	ORTHOMCL4049	hypothetical protein	1	1	1	1	0	0	0	0	1	1	1	1	1	1	1	1	1	1	0
	ORTHOMCL4149	Small-conductance mechanosensitive channel	1	1	1	1	1	1	1	1	1	1	0	0	1	0	1	0	1	1	1
	ORTHOMCL4248	Isopropylmalate/homocitrate/citramalate synthases( EC:4.1.3.4 )	1	1	1	1	0	0	0	1	1	1	1	1	1	0	1	1	1	1	1
	ORTHOMCL4873	coenzyme PQQ biosynthesis protein A	0	0	0	0	1	1	0	1	0	0	1	0	0	0	1	0	0	0	0
	ORTHOMCL5260	ABC transporter, periplasmic substrate-binding protein, aliphatic sulfonates family	0	0	0	0	0	0	0	0	0	0	1	0	1	1	0	1	0	0	0
	ORTHOMCL5500	dipeptide ABC transporter, permease protein DppC, putative	0	0	0	0	0	0	0	1	0	0	1	1	1	0	0	1	0	0	0
	ORTHOMCL5678	major facilitator family transporter	0	0	0	0	0	0	0	0	0	0	0	1	1	0	0	1	0	0	1
	ORTHOMCL5682	sensor histidine kinase	0	0	0	0	0	0	0	0	0	0	0	1	1	0	0	1	0	0	1
	ORTHOMCL5683	sensory box histidine kinase/response regulator	0	0	0	0	0	0	0	0	0	0	0	1	1	0	0	1	0	0	1
	ORTHOMCL5684	response regulator	0	0	0	0	0	0	0	0	0	0	0	1	1	0	0	1	0	0	1
	ORTHOMCL5753	hypothetical protein	0	0	0	0	1	1	1	1	0	0	1	0	0	0	0	0	0	0	0
	ORTHOMCL5936	DNA-binding response regulator CpxR	0	0	0	0	0	0	0	0	0	0	1	1	1	0	0	1	0	0	1
	ORTHOMCL5937	sensor histidine kinase	0	0	0	0	0	0	0	0	0	0	1	1	1	0	0	1	0	0	1
	ORTHOMCL5961	hypothetical protein	0	0	0	0	0	0	1	1	0	0	0	0	1	0	0	0	0	1	1
	ORTHOMCL5964	transcriptional regulator, AraC family	0	0	0	0	0	0	0	0	0	0	0	1	1	0	1	1	0	0	1
	ORTHOMCL5985	esterase/lipase/thioesterase family protein	0	0	0	0	1	1	1	1	0	0	0	0	0	0	0	0	0	0	0
	ORTHOMCL6017	Transcriptional activator of acetoin/glycerol metabolism	0	0	0	0	1	1	0	0	1	0	0	0	0	0	1	1	0	0	0
	ORTHOMCL6018	regulatory protein, LysR:LysR, substrate-binding	0	0	0	0	1	1	0	0	1	1	0	0	0	0	0	1	0	0	0
	ORTHOMCL6126	Threonine dehydrogenase and related Zn-dependent dehydrogenases	0	0	0	0	1	1	0	0	0	0	1	0	0	0	0	0	1	0	0
	ORTHOMCL6127	transcriptional regulator, Crp/Fnr family	0	0	0	0	0	0	0	0	1	0	0	0	1	0	0	0	1	0	1
	ORTHOMCL6151	Transcriptional regulator	0	0	0	0	1	1	1	1	0	0	0	0	0	0	0	0	0	0	0
	ORTHOMCL6152	Arabinose efflux permease	0	0	0	0	1	1	1	1	0	0	0	0	0	0	0	0	0	0	0
	ORTHOMCL6208	Permeases of the drug/metabolite transporter (DMT) superfamily	0	0	0	0	1	1	0	1	0	0	0	0	0	0	0	0	1	1	0
	ORTHOMCL6209	hypothetical protein	0	0	0	0	1	1	1	0	0	0	0	0	1	0	0	0	0	1	0
	ORTHOMCL6218	DNA-binding response regulator BaeS	0	0	0	0	0	0	0	0	0	0	1	1	1	0	0	1	0	0	1
	ORTHOMCL6219	sensor histidine kinase BaeS( EC:2.7.13.3,EC:2.7.13.3 )	0	0	0	0	0	0	0	0	0	0	1	1	1	0	0	1	0	0	1
	ORTHOMCL6220	multidrug resistance protein	0	0	0	0	0	0	0	0	0	0	1	1	1	0	0	1	0	0	1
	ORTHOMCL6221	outer membrane protein	0	0	0	0	0	0	0	0	0	0	1	1	1	0	0	1	0	0	1
	ORTHOMCL6225	oxidoreductase, short chain dehydrogenase/reductase family	0	0	0	0	1	1	0	0	1	0	1	0	0	0	0	1	0	0	0
	ORTHOMCL6226	ribose ABC transporter, permease protein	0	0	0	0	0	0	0	0	1	0	1	1	0	0	0	0	1	1	0
	ORTHOMCL6238	citrate transporter, CitMHS family	0	0	0	0	0	0	0	0	0	0	1	1	0	0	0	0	1	1	1
	ORTHOMCL6241	hypothetical protein	0	0	0	0	0	0	1	1	0	0	0	0	1	0	0	0	0	1	1
	ORTHOMCL6242	hypothetical protein	0	0	0	0	0	0	1	1	0	0	0	0	1	0	0	0	0	1	1
	ORTHOMCL6243	hypothetical protein	0	0	0	0	0	0	1	1	0	0	0	0	1	0	0	0	0	1	1
	ORTHOMCL6244	hypothetical protein	0	0	0	0	0	0	1	1	0	0	0	0	1	0	0	0	0	1	1
	ORTHOMCL6245	Phage putative head morphogenesis protein, SPP1 gp7	0	0	0	0	0	0	1	1	0	0	0	0	1	0	0	0	0	1	1
	ORTHOMCL6246	hypothetical protein	0	0	0	0	0	0	1	1	0	0	0	0	1	0	0	0	0	1	1
	ORTHOMCL6250	hypothetical protein	0	0	0	0	0	0	0	1	0	0	0	0	1	1	0	0	0	1	1
	ORTHOMCL6268	NAD dependent epimerase/dehydratase family.	0	0	0	0	1	1	0	1	0	0	1	0	0	1	0	0	0	0	0
	ORTHOMCL6285	Uncharacterized protein conserved in bacteria	0	0	0	0	0	0	0	0	0	0	0	1	1	0	0	1	0	0	1
	ORTHOMCL6309	Lactate dehydrogenase and related dehydrogenases	0	0	0	0	0	0	0	0	0	1	1	0	0	0	1	1	0	0	1
	ORTHOMCL6371	Uncharacterized NAD(FAD)-dependent dehydrogenases	0	0	0	0	0	0	1	0	0	0	0	0	0	1	1	0	1	1	0
	ORTHOMCL6372	Protein of unknown function (DUF1641).	0	0	0	0	0	0	1	0	0	0	0	0	0	1	1	0	1	1	0
	ORTHOMCL6408	hypothetical protein	0	0	0	0	1	1	1	1	0	0	0	0	0	0	0	0	0	0	0
	ORTHOMCL6409	Protein of unknown function (DUF3144).	0	0	0	0	1	1	0	1	0	0	0	0	0	0	0	0	1	0	0
	ORTHOMCL6410	Uncharacterized protein, possibly involved in aromatic compounds catabolism	0	0	0	0	1	1	0	1	1	0	0	0	0	0	0	0	0	0	0
	ORTHOMCL6427	Phenylpropionate dioxygenase and related ring-hydroxylating dioxygenases, large terminal subunit	0	0	0	0	1	1	0	1	0	0	1	0	0	0	0	0	0	0	0
	ORTHOMCL6430	Universal stress protein UspA and related nucleotide-binding proteins	0	0	0	0	0	0	0	0	1	0	1	0	0	0	0	0	1	0	1
	ORTHOMCL6458	Na+/phosphate symporter	0	0	0	0	0	0	0	0	0	0	0	1	1	0	0	1	0	0	1
	ORTHOMCL6485	esterase/lipase/thioesterase family protein	0	0	0	0	1	1	0	0	0	0	1	1	0	0	0	1	0	0	0
	ORTHOMCL6508	Predicted lactoylglutathione lyase	0	0	0	0	0	0	0	0	0	0	0	1	1	0	0	1	0	0	1
	ORTHOMCL6514	Predicted transcriptional regulator	0	0	0	0	1	1	0	1	0	0	0	0	0	0	0	0	1	1	0
	ORTHOMCL6518	Predicted kinase	0	0	0	0	0	0	1	1	0	0	0	1	0	0	0	1	0	0	0
	ORTHOMCL6526	hypothetical protein	0	0	0	0	0	0	0	0	1	0	1	0	0	0	1	1	0	0	1
	ORTHOMCL6559	hypothetical protein	0	0	0	0	1	1	0	1	0	0	0	0	0	1	0	0	1	0	0
	ORTHOMCL6579	Arabinose efflux permease	0	0	0	0	0	0	0	1	0	0	0	1	0	1	0	1	1	0	0
	ORTHOMCL6663	Transcriptional regulator	0	0	0	0	1	1	0	0	1	0	0	0	0	0	1	1	0	0	0
	ORTHOMCL6664	Hemolysin-type calcium-binding region:Haemolysin-type calcium binding related	0	0	0	0	1	1	0	0	1	0	1	0	0	0	1	0	0	0	0
	ORTHOMCL6682	Surfeit locus 4-related	0	0	0	0	1	1	0	0	1	1	0	0	0	0	0	1	0	0	0
	ORTHOMCL6683	Phospholipase/Carboxylesterase	0	0	0	0	1	1	0	0	1	1	0	0	0	0	0	1	0	0	0
	ORTHOMCL6684	Catalytic LigB subunit of aromatic ring-opening dioxygenase	0	0	0	0	1	1	0	0	1	1	0	0	0	0	0	1	0	0	0
	ORTHOMCL6685	NADP oxidoreductase, coenzyme F420-dependent	0	0	0	0	1	1	0	0	1	1	0	0	0	0	0	1	0	0	0
	ORTHOMCL6686	3-oxoacid CoA-transferase, B subunit( EC:2.8.3.6 )	0	0	0	0	1	1	0	1	1	0	1	0	0	0	0	0	0	0	0
	ORTHOMCL6687	3-oxoacid CoA-transferase, A subunit( EC:2.8.3.6 )	0	0	0	0	1	1	0	1	1	0	1	0	0	0	0	0	0	0	0
	ORTHOMCL6692	hypothetical protein	0	0	0	0	1	1	1	1	0	0	0	0	0	0	0	0	0	1	0
	ORTHOMCL6693	Transcriptional regulator	0	0	0	0	1	1	1	0	1	0	0	0	0	0	0	1	0	0	0
	ORTHOMCL6695	hypothetical protein	0	0	0	0	0	0	1	1	0	0	1	0	0	0	1	0	0	0	1
	ORTHOMCL6736	Uncharacterized protein conserved in bacteria	0	0	0	0	1	1	1	1	0	0	0	0	0	1	0	0	0	0	0
	ORTHOMCL6741	Predicted amidohydrolase( EC:3.5.5.1 )	0	0	0	0	0	0	0	0	0	0	1	0	0	1	1	0	1	1	0
	ORTHOMCL6769	Methyl-accepting chemotaxis protein	0	0	0	0	0	0	0	0	0	0	1	0	1	0	0	0	1	1	1
	ORTHOMCL6770	hypothetical protein	0	0	0	0	1	1	0	0	0	0	1	0	1	0	1	0	0	0	0
	ORTHOMCL6780	hypothetical protein	0	0	0	0	1	1	0	0	0	0	0	0	1	0	0	1	0	0	1
	ORTHOMCL6784	Nitric oxide reductase large subunit( EC:1.7.2.5 )	0	0	0	0	0	0	0	0	0	0	0	0	0	0	1	0	1	1	1
	ORTHOMCL6785	Cytochrome c.	0	0	0	0	0	0	0	0	0	0	0	0	0	0	1	0	1	1	1
	ORTHOMCL6786	Heme/copper-type cytochrome/quinol oxidase, subunit 3	0	0	0	0	0	0	0	0	0	0	0	0	0	0	1	0	1	1	1
	ORTHOMCL6787	MoxR-like ATPases	0	0	0	0	0	0	0	0	0	0	0	0	0	0	1	0	1	1	1
	ORTHOMCL6793	hypothetical protein	0	0	0	0	1	1	1	1	0	0	0	0	0	0	0	0	0	0	0
	ORTHOMCL6795	Parvulin-like peptidyl-prolyl isomerase( EC:5.2.1.8 )	0	0	0	0	0	0	0	0	0	0	0	0	0	0	1	0	1	1	1
	ORTHOMCL6796	respiratory nitrate reductase, gamma subunit( EC:1.7.99.4 )	0	0	0	0	0	0	0	0	0	0	0	0	0	0	1	0	1	1	1
	ORTHOMCL6797	nitrate reductase molybdenum cofactor assembly chaperone( EC:1.7.99.4 )	0	0	0	0	0	0	0	0	0	0	0	0	0	0	1	0	1	1	1
	ORTHOMCL6798	nitrate reductase, beta subunit( EC:1.7.99.4 )	0	0	0	0	0	0	0	0	0	0	0	0	0	0	1	0	1	1	1
	ORTHOMCL6799	respiratory nitrate reductase, alpha subunit( EC:1.7.99.4 )	0	0	0	0	0	0	0	0	0	0	0	0	0	0	1	0	1	1	1
	ORTHOMCL6800	nitrite extrusion protein (nitrite facilitator)	0	0	0	0	0	0	0	0	0	0	0	0	0	0	1	0	1	1	1
	ORTHOMCL6801	Nitrate/nitrite transporter	0	0	0	0	0	0	0	0	0	0	0	0	0	0	1	0	1	1	1
	ORTHOMCL6802	Putative lipid carrier protein	0	0	0	0	0	0	0	0	0	0	0	0	0	0	1	0	1	1	1
	ORTHOMCL6808	Collagenase and related proteases	0	0	0	0	0	0	0	0	0	0	0	0	0	0	1	0	1	1	1
	ORTHOMCL6809	Collagenase and related proteases( EC:3.4.- )	0	0	0	0	0	0	0	0	0	0	0	0	0	0	1	0	1	1	1
	ORTHOMCL6810	molybdenum cofactor synthesis domain	0	0	0	0	0	0	0	0	0	0	0	0	0	0	1	0	1	1	1
	ORTHOMCL6811	molybdenum cofactor biosynthesis protein B, proteobacterial	0	0	0	0	0	0	0	0	0	0	0	0	0	0	1	0	1	1	1
	ORTHOMCL6812	cAMP-binding proteins - catabolite gene activator and regulatory subunit of cAMP-dependent protein kinases	0	0	0	0	0	0	0	0	0	0	0	0	0	0	1	0	1	1	1
	ORTHOMCL6813	Nitric oxide reductase activation protein	0	0	0	0	0	0	0	0	0	0	0	0	0	0	1	0	1	1	1
	ORTHOMCL6822	Universal stress protein UspA and related nucleotide-binding proteins	0	0	0	0	0	0	0	0	1	0	0	0	1	0	0	0	1	0	1
	ORTHOMCL6828	Predicted periplasmic protein	0	0	0	0	1	1	0	1	0	0	0	0	0	1	0	0	0	0	0
	ORTHOMCL6838	hypothetical protein	0	0	0	0	0	0	0	0	0	0	0	1	1	0	0	1	0	0	1
	ORTHOMCL6843	hypothetical protein	0	0	0	0	1	1	0	0	0	0	1	1	0	0	0	0	1	0	0
	ORTHOMCL6846	Transcriptional regulators	0	0	0	0	0	0	0	0	0	1	1	1	0	0	0	1	0	0	1
	ORTHOMCL6867	hypothetical protein	0	0	0	0	0	0	1	1	0	0	0	1	0	1	0	1	0	0	0
	ORTHOMCL6872	hypothetical protein	0	0	0	0	0	0	0	1	0	0	1	1	0	1	0	1	0	0	0
	ORTHOMCL6873	Glycosyltransferases involved in cell wall biogenesis	0	0	0	0	1	1	0	0	0	0	0	1	1	0	0	0	0	0	1
	ORTHOMCL6897	Transcriptional regulator	0	0	0	0	0	0	0	0	0	0	0	1	1	0	1	1	0	0	1
	ORTHOMCL6900	hypothetical protein	0	0	0	0	1	1	1	0	0	0	0	1	0	0	0	1	0	0	0
	ORTHOMCL6916	Transcriptional regulator	0	0	0	0	0	0	0	0	1	0	0	1	1	0	0	1	1	0	0
	ORTHOMCL6917	hypothetical protein	0	0	0	0	0	0	0	0	0	0	1	1	1	0	0	1	0	0	1
	ORTHOMCL6930	Coproporphyrinogen III oxidase and related Fe-S oxidoreductases( EC:1.3.99.22 )	0	0	0	0	0	0	0	0	0	0	0	0	0	0	1	0	1	1	1
	ORTHOMCL6931	hypothetical protein	0	0	0	0	0	0	0	0	0	0	0	1	1	0	0	1	0	0	1
	ORTHOMCL6951	hypothetical protein	0	0	0	0	0	0	1	1	0	1	0	0	0	0	0	0	0	1	1
	ORTHOMCL6973	Glutathione S-transferase( EC:2.5.1.18 )	0	0	0	0	0	0	0	0	0	0	0	0	1	1	1	0	1	1	0
	ORTHOMCL7003	Uncharacterized phage-associated protein	0	0	0	0	1	1	0	1	0	0	0	0	1	0	0	0	0	0	1
	ORTHOMCL7134	Methyl-accepting chemotaxis protein	0	0	0	0	0	0	0	0	1	0	0	0	0	0	1	1	1	1	0
	ORTHOMCL7149	Glycerol dehydrogenase and related enzymes( EC:1.1.1.6 )	0	0	0	0	1	1	0	0	1	0	1	0	0	0	0	0	1	0	0
	ORTHOMCL7151	hypothetical protein	0	0	0	0	0	0	0	0	1	1	1	0	0	0	0	0	1	1	0
	ORTHOMCL7206	hypothetical protein	0	0	0	0	1	1	1	0	0	0	0	0	0	0	0	0	1	1	0
	ORTHOMCL7273	Transcriptional regulator	0	0	0	0	0	0	0	0	1	0	1	0	0	1	0	0	1	1	0
	ORTHOMCL7274	hypothetical protein	0	0	0	0	0	0	0	0	1	0	1	0	0	1	0	0	1	1	0
	ORTHOMCL7295	hypothetical protein	0	0	0	0	0	0	0	0	0	0	0	0	0	1	1	0	1	1	1
	ORTHOMCL7296	type VI secretion system effector, Hcp1 family	0	0	0	0	0	0	0	0	0	0	0	0	0	1	1	0	1	1	1
	ORTHOMCL7299	hypothetical protein	0	0	0	0	1	1	0	0	0	0	0	0	0	1	1	0	0	0	1
	ORTHOMCL7300	Predicted transcriptional regulators	0	0	0	0	0	0	0	0	0	0	1	0	0	1	1	0	1	1	0
	ORTHOMCL7301	Uncharacterized conserved protein	0	0	0	0	0	0	0	0	0	0	1	0	0	1	1	0	1	1	0
	ORTHOMCL7316	Response regulators consisting of a CheY-like receiver domain and a winged-helix DNA-binding domain	0	0	0	0	0	0	0	0	0	0	1	0	0	1	1	0	1	1	0
	ORTHOMCL7318	hypothetical protein	0	0	0	0	1	1	0	1	0	0	1	0	0	1	0	0	0	0	0
	ORTHOMCL7336	Transcriptional regulator	0	0	0	0	1	1	0	1	0	0	0	0	1	1	0	0	0	0	0
	ORTHOMCL7339	Predicted branched-chain amino acid permease (azaleucine resistance)	0	0	0	0	0	0	0	0	0	0	1	0	1	1	0	0	1	1	0
	ORTHOMCL7340	Predicted membrane protein	0	0	0	0	0	0	0	0	0	0	1	0	1	1	0	0	1	1	0
	ORTHOMCL7344	Protein of unknown function (DUF3630).	0	0	0	0	0	0	0	1	0	0	0	0	1	0	0	1	1	1	0
	ORTHOMCL7362	hypothetical protein	0	0	0	0	1	1	1	1	0	0	0	0	0	0	0	0	0	0	0
	ORTHOMCL7368	hypothetical protein	0	0	0	0	0	0	0	0	0	0	0	0	1	1	1	1	0	0	0
	ORTHOMCL7370	hypothetical protein	0	0	0	0	0	0	1	0	0	0	0	0	1	0	0	1	0	1	0
	ORTHOMCL7380	cAMP-binding proteins - catabolite gene activator and regulatory subunit of cAMP-dependent protein kinases	0	0	0	0	0	0	0	0	0	0	0	0	0	0	1	0	1	1	1
	ORTHOMCL7389	pyridoxamine-phosphate oxidase( EC:1.4.3.5 )	0	0	0	0	0	0	0	0	0	0	0	0	0	0	1	0	1	1	1
	ORTHOMCL7390	Transcriptional regulator containing GAF, AAA-type ATPase, and DNA binding domains	0	0	0	0	0	0	0	0	0	0	0	0	0	0	1	0	1	1	1
	ORTHOMCL7391	iron-sulfur cluster repair di-iron protein	0	0	0	0	0	0	0	0	0	0	0	0	0	0	1	0	1	1	1
	ORTHOMCL7392	Uncharacterized protein conserved in bacteria	0	0	0	0	0	0	0	0	0	0	0	0	0	0	1	0	1	1	1
	ORTHOMCL7393	hypothetical protein	0	0	0	0	0	0	0	0	0	0	0	0	0	0	1	0	1	1	1
	ORTHOMCL7400	Xanthine and CO dehydrogenases maturation factor, XdhC/CoxF family	0	0	0	0	1	1	1	1	0	0	0	0	0	0	0	0	0	0	0
	ORTHOMCL7434	Transcriptional regulator	0	0	0	0	0	0	0	0	0	1	1	1	1	0	0	1	0	0	0
	ORTHOMCL7435	Na+/H+-dicarboxylate symporters	0	0	0	0	0	0	0	0	0	1	1	1	1	0	0	1	0	0	0
	ORTHOMCL7436	aspartate racemase( EC:5.1.1.13 )	0	0	0	0	0	0	0	0	0	1	1	1	1	0	0	1	0	0	0
	ORTHOMCL7437	Asp-tRNAAsn/Glu-tRNAGln amidotransferase A subunit and related amidases( EC:3.5.1.4 )	0	0	0	0	0	0	0	1	0	0	0	1	1	0	1	1	0	0	0
	ORTHOMCL7438	4-aminobutyrate aminotransferase and related aminotransferases( EC:2.6.1.76 )	0	0	0	0	1	0	0	0	0	0	0	1	1	0	0	1	0	0	0
	ORTHOMCL7441	Common central domain of tyrosinase.( EC:1.14.18.1 )	0	0	0	0	1	1	0	0	0	0	0	1	0	0	0	1	0	0	1
	ORTHOMCL7442	Domain of unknown function (DUF1905).	0	0	0	0	0	0	0	0	1	0	1	1	0	1	0	0	0	0	1
	ORTHOMCL7444	hypothetical protein	0	0	0	0	0	0	1	1	0	0	0	1	1	0	0	1	0	0	0
	ORTHOMCL7456	hypothetical protein	0	0	0	0	0	0	0	0	0	0	0	1	1	0	1	1	0	0	1
	ORTHOMCL7458	Uncharacterized conserved protein, contains double-stranded beta-helix domain	0	0	0	0	0	0	0	0	0	0	0	1	1	0	1	1	0	0	0
	ORTHOMCL7468	hypothetical protein	0	0	0	0	1	1	0	0	0	0	0	1	1	0	0	1	0	0	0
	ORTHOMCL7471	hypothetical protein	0	0	0	0	1	1	0	0	0	0	0	1	0	0	0	1	0	1	0
	ORTHOMCL7476	Phosphodiesterase/alkaline phosphatase D	0	0	0	0	0	0	0	0	0	0	1	1	1	0	0	1	0	0	1
	ORTHOMCL7477	Thiamine pyrophosphate enzyme, C-terminal TPP binding domain.( EC:2.2.1.6 )	0	0	0	0	1	0	0	0	0	0	1	1	0	0	0	1	0	0	1
	ORTHOMCL7486	Integrase	0	0	0	0	0	0	0	0	1	0	1	1	0	1	0	1	0	0	0
	ORTHOMCL7487	hypothetical protein	0	0	0	0	0	0	0	0	0	0	0	1	1	0	1	1	0	0	1
	ORTHOMCL7488	ATP-dependent metalloprotease FtsH( EC:3.4.24.- )	0	0	0	0	0	0	0	0	0	0	0	1	1	0	1	1	0	0	1
	ORTHOMCL7489	Histidine kinase-, DNA gyrase B-, and HSP90-like ATPase.	0	0	0	0	0	0	0	0	0	0	0	1	1	0	1	1	0	0	1
	ORTHOMCL4292	Transcriptional regulator	1	2	1	2	0	0	0	0	1	1	0	1	1	0	1	1	1	1	0
	ORTHOMCL3870	hypothetical protein	1	0	0	0	1	1	1	1	0	0	2	1	1	0	1	1	1	1	1
	ORTHOMCL6745	Esterase/lipase	1	1	1	1	0	0	0	0	1	0	0	0	0	1	0	0	0	0	0
	ORTHOMCL3878	hypothetical protein	0	0	0	0	0	0	1	1	1	1	1	1	1	1	1	1	1	1	1
	ORTHOMCL6385	ATPases involved in chromosome partitioning	0	1	1	1	0	0	0	0	1	0	0	0	0	1	0	0	0	0	0
	ORTHOMCL3773	hypothetical protein	1	0	0	0	1	1	1	1	1	0	1	1	0	1	1	1	1	1	1
	ORTHOMCL3967	hypothetical protein	1	0	0	0	1	1	1	1	0	1	1	1	1	0	1	1	1	1	1
	ORTHOMCL4058	hypothetical protein	1	0	0	0	1	1	1	1	1	0	1	1	0	1	1	1	1	1	1
	ORTHOMCL4095	regulatory protein, GntR:Bacterial regulatory protein, GntR	1	0	0	0	1	1	1	1	0	1	1	1	1	0	1	1	1	1	1
	ORTHOMCL4096	ADP-ribosylglycohydrolase( EC:3.2.- )	1	0	0	0	1	1	1	1	0	1	1	1	1	0	1	1	1	1	1
	ORTHOMCL2808	hypothetical protein	1	0	0	1	1	1	1	2	1	0	1	1	2	0	2	1	2	2	1
	ORTHOMCL4154	outer membrane porin, OprD family.	1	1	1	1	1	1	0	1	0	1	0	0	1	0	1	0	0	1	1
	ORTHOMCL5560	hypothetical protein	0	0	0	0	1	1	1	0	0	0	0	0	2	0	0	0	0	0	1
	ORTHOMCL5623	Domain of unknown function (DUF1910)./Domain of unknown function (DUF1911).	0	0	0	0	1	1	0	1	0	0	0	2	1	0	0	0	0	0	0
	ORTHOMCL5724	hypothetical protein	0	0	0	0	0	0	0	0	1	0	1	0	2	0	1	0	0	1	0
	ORTHOMCL6329	hypothetical protein	0	0	0	0	0	0	1	2	0	0	0	0	0	0	1	0	1	1	0
	ORTHOMCL6403	hypothetical protein	0	0	0	0	1	1	1	2	0	0	0	0	1	0	0	0	0	0	0
	ORTHOMCL6491	hypothetical protein	0	0	0	0	1	1	0	2	0	0	0	1	0	0	0	0	0	0	1
	ORTHOMCL6827	TnsA endonuclease N terminal.	0	0	0	0	0	0	0	0	0	1	1	0	0	2	0	0	1	0	0
	ORTHOMCL6870	hypothetical protein	0	0	0	0	0	0	0	1	0	1	0	1	0	0	0	2	0	0	1
	ORTHOMCL6890	Predicted hydrolases or acyltransferases (alpha/beta hydrolase superfamily)	0	0	0	0	0	0	0	0	0	0	0	2	1	0	1	1	0	0	1
	ORTHOMCL3936	N-carbamoyl-L-amino acid amidohydrolase( EC:3.5.1.6,EC:3.5.1.87 )	1	1	1	2	0	0	0	0	1	1	0	1	1	1	1	1	1	1	0
	ORTHOMCL5690	hypothetical protein	0	0	0	0	0	0	0	2	0	2	1	0	1	0	0	0	0	0	1
	ORTHOMCL6328	hypothetical protein	0	0	0	0	0	0	1	2	0	0	0	0	0	0	2	0	1	1	0
	ORTHOMCL3918	Transcriptional regulator	1	1	2	2	1	1	1	1	2	0	1	0	0	0	0	0	1	1	0
	ORTHOMCL5475	oxidoreductase, short chain dehydrogenase/reductase family	1	1	1	1	0	0	0	0	1	0	0	1	0	0	1	0	0	0	0
	ORTHOMCL5971	hypothetical protein	1	1	1	1	0	0	0	0	0	0	1	0	0	0	0	0	0	1	0
	ORTHOMCL6022	Cytochrome c peroxidase	1	1	1	0	0	0	0	1	1	1	0	0	0	0	0	0	0	0	0
	ORTHOMCL6039	Transcriptional regulator	1	1	1	1	0	0	0	0	0	0	0	0	0	0	1	1	0	0	1
	ORTHOMCL6362	hypothetical protein	1	1	1	1	0	0	0	0	1	0	1	0	0	0	1	0	0	0	0
	ORTHOMCL5527	isochorismatase family protein( EC:3.- )	0	1	1	1	0	0	0	0	1	1	1	0	0	0	0	0	0	0	0
	ORTHOMCL5754	Threonine dehydratase( EC:4.3.1.19 )	1	0	1	1	0	0	0	0	1	1	1	0	0	0	0	0	0	0	0
	ORTHOMCL6010	hypothetical protein	0	1	1	1	0	0	0	0	1	1	1	0	0	0	0	0	0	0	0
	ORTHOMCL6319	Purine-cytosine permease and related proteins	0	1	1	1	0	0	0	0	1	1	1	0	0	0	0	0	0	0	0
	ORTHOMCL6322	Predicted xylanase/chitin deacetylase( EC:3.5.1.41 )	0	1	1	1	0	0	0	0	1	1	1	0	0	0	0	0	0	0	0
	ORTHOMCL6323	Predicted acyltransferase	0	1	1	1	0	0	0	0	1	1	1	0	0	0	0	0	0	0	0
	ORTHOMCL3762	bacterial luciferase family protein( EC:1.14.14.5 )	1	0	0	0	1	1	1	1	0	0	1	1	1	0	1	1	1	1	1
	ORTHOMCL3785	RNA polymerase sigma-70 family protein	1	0	0	0	1	1	1	1	0	0	1	1	1	0	1	1	1	1	1
	ORTHOMCL3786	sigma factor regulatory protein, FecR/PupR family	1	0	0	0	1	1	1	1	0	0	1	1	1	0	1	1	1	1	1
	ORTHOMCL3787	iron(III) dicitrate transport protein fecA	1	0	0	0	1	1	1	1	0	0	1	1	1	0	1	1	1	1	1
	ORTHOMCL3907	alkanesulfonate monooxygenase family protein( EC:1.14.14.5 )	1	0	0	0	1	1	1	1	1	0	1	1	1	0	1	1	1	1	0
	ORTHOMCL3913	alcohol dehydrogenase II( EC:1.1.1.1,EC:1.1.1.1 )	1	0	0	0	1	1	1	1	0	0	1	1	1	0	1	1	1	1	1
	ORTHOMCL3975	hypothetical protein	1	0	0	0	1	1	1	1	0	0	1	1	1	0	1	1	1	1	1
	ORTHOMCL4002	hydrolase, HAD-superfamily, subfamily IIB	1	0	0	0	1	1	1	1	0	0	1	1	1	0	1	1	1	1	1
	ORTHOMCL4065	hypothetical protein	1	0	0	0	1	1	1	1	0	0	1	1	1	0	1	1	1	1	1
	ORTHOMCL4205	Permease for cytosine/purines, uracil, thiamine, allantoin	1	0	0	0	1	1	1	1	0	0	1	1	1	0	1	1	1	1	1
	ORTHOMCL4206	Carbohydrate kinase, PfkB	1	0	0	0	1	1	1	1	0	0	1	1	1	0	1	1	1	1	1
	ORTHOMCL4214	serine/threonine phosphoprotein phosphatase( EC:3.1.3.16 )	1	0	0	0	1	1	1	1	0	0	1	1	1	0	1	1	1	1	1
	ORTHOMCL4264	RNA polymerase sigma factor, sigma-70 family	1	0	0	0	1	1	1	1	0	0	1	1	1	0	1	1	1	1	1
	ORTHOMCL4395	hypothetical protein	1	0	0	0	1	1	1	1	0	0	1	1	1	0	1	1	1	1	1
	ORTHOMCL4396	Uncharacterized protein containing a von Willebrand factor type A (vWA) domain	1	0	0	0	1	1	1	1	0	0	1	1	1	0	1	1	1	1	1
	ORTHOMCL4469	Protein of unknown function (DUF1375).	1	0	0	0	1	1	1	0	1	1	1	1	1	1	1	1	1	1	0
	ORTHOMCL4303	outer membrane porin, OprD family.	0	0	0	1	0	0	0	0	2	1	2	1	0	1	2	1	1	1	2
	ORTHOMCL3354	colicin/pyocin immunity family protein	0	0	0	0	0	0	0	1	1	0	1	1	1	2	0	1	2	1	1
	ORTHOMCL4467	Dehydrogenases with different specificities (related to short-chain alcohol dehydrogenases)( EC:1.1.1.100 )	0	0	0	1	0	0	0	1	0	0	1	1	1	1	1	1	2	1	1
	ORTHOMCL6668	Uncharacterized conserved protein	0	2	1	1	0	0	0	0	1	0	0	0	0	0	0	0	0	0	0
	ORTHOMCL2779	glycosyl hydrolase, family 15	1	1	1	1	1	1	1	1	1	0	1	1	0	1	1	1	0	0	1
	ORTHOMCL3316	methyl-accepting chemotaxis protein	1	1	1	1	1	1	1	1	0	0	0	1	1	0	1	1	1	1	1
	ORTHOMCL3351	glycosyl transferase, group 1 family protein	1	1	1	1	0	0	1	1	1	1	1	1	0	1	1	1	1	1	0
	ORTHOMCL3950	hypothetical protein	1	1	1	1	1	1	1	1	0	0	1	1	1	1	1	0	1	1	0
	ORTHOMCL5076	prophage PSPPH04, tail fiber domain protein	0	0	0	0	0	0	1	1	0	0	1	0	0	0	0	0	0	0	1
	ORTHOMCL5281	pyruvate dehydrogenase( EC:1.2.5.1 )	0	0	0	0	1	1	1	1	0	0	0	0	0	0	0	0	0	0	0
	ORTHOMCL5674	acetyltransferase, GNAT family	0	0	0	0	0	0	0	1	0	0	0	0	1	0	0	0	0	0	1
	ORTHOMCL5686	hypothetical protein	0	0	0	0	0	0	1	1	0	0	1	0	0	0	0	0	0	0	1
	ORTHOMCL5858	hypothetical protein	0	0	0	0	1	1	0	0	1	0	0	0	0	0	0	0	0	0	0
	ORTHOMCL5922	type VI secretion protein, VC_A0114 family	0	0	0	0	0	0	0	0	0	0	0	1	0	0	0	1	0	0	1
	ORTHOMCL5923	type VI secretion protein IcmF	0	0	0	0	0	0	0	0	0	0	0	1	0	0	0	1	0	0	1
	ORTHOMCL5947	hypothetical protein	0	0	0	0	1	1	0	1	0	0	0	0	0	1	0	0	0	0	0
	ORTHOMCL5950	transcriptional regulator, MarR family	0	0	0	0	0	0	0	0	0	0	0	1	1	0	0	1	0	0	1
	ORTHOMCL5951	feruloyl-CoA synthetase( EC:6.2.1.34 )	0	0	0	0	0	0	0	0	0	0	0	1	1	0	0	1	0	0	1
	ORTHOMCL5952	thiolase family protein( EC:2.3.1.9,EC:2.3.1.16 )	0	0	0	0	0	0	0	0	0	0	0	1	1	0	0	1	0	0	1
	ORTHOMCL6005	3-hydroxyisobutyrate dehydrogenase family protein( EC:1.1.1.31 )	0	0	0	0	0	0	0	0	1	1	1	0	0	0	0	0	1	0	0
	ORTHOMCL6021	hypothetical protein	0	0	0	0	1	1	1	1	0	0	0	0	0	0	0	0	0	0	0
	ORTHOMCL6134	hypothetical protein	0	0	0	0	0	0	0	1	0	0	0	0	0	0	0	1	0	1	0
	ORTHOMCL6160	yersiniabactin synthetase, salycilate ligase component Irp5( EC:6.3.2.- )	0	0	0	0	0	0	0	0	0	0	1	1	0	0	0	1	0	0	1
	ORTHOMCL6164	0	0	0	0	0	0	0	0	0	0	0	0	1	0	0	1	1	0	0	1
	ORTHOMCL6187	Phosphate-selective porin	0	0	0	0	0	0	0	0	0	0	0	1	0	0	0	1	0	0	1
	ORTHOMCL6235	amidase( EC:3.5.1.4 )	0	0	0	0	0	0	0	0	1	0	0	0	0	0	1	1	0	0	1
	ORTHOMCL6270	hypothetical protein	0	0	0	0	1	1	0	0	0	0	0	1	0	0	0	0	0	0	1
	ORTHOMCL6290	hypothetical protein	0	0	0	0	1	1	0	0	0	0	0	0	0	0	0	0	1	1	0
	ORTHOMCL6310	hypothetical protein	0	0	0	0	0	0	0	0	0	0	1	0	0	0	1	0	1	1	0
	ORTHOMCL6460	diaminopimelate decarboxylase( EC:4.1.1.20 )	0	0	0	0	0	0	0	0	0	0	0	1	1	0	0	1	0	0	0
	ORTHOMCL6484	hypothetical protein	0	0	0	0	0	0	0	1	0	0	0	1	1	0	0	1	0	0	0
	ORTHOMCL6493	RNA polymerase-binding protein DksA	0	0	0	0	0	0	0	0	0	0	0	1	0	0	0	1	0	0	1
	ORTHOMCL6494	type VI secretion system lysozyme-related protein	0	0	0	0	0	0	0	0	0	0	0	1	0	0	0	1	0	0	1
	ORTHOMCL6495	type VI secretion protein, VC_A0107 family	0	0	0	0	0	0	0	0	0	0	0	1	0	0	0	1	0	0	1
	ORTHOMCL6496	type VI secretion-associated protein, ImpA family	0	0	0	0	0	0	0	0	0	0	0	1	0	0	0	1	0	0	1
	ORTHOMCL6497	type VI secretion system FHA domain protein	0	0	0	0	0	0	0	0	0	0	0	1	0	0	0	1	0	0	1
	ORTHOMCL6498	type VI secretion lipoprotein, VC_A0113 family	0	0	0	0	0	0	0	0	0	0	0	1	0	0	0	1	0	0	1
	ORTHOMCL6499	type VI secretion system OmpA/MotB family protein	0	0	0	0	0	0	0	0	0	0	0	1	0	0	0	1	0	0	1
	ORTHOMCL6500	type VI secretion-associated protein, BMA_A0400 family	0	0	0	0	0	0	0	0	0	0	0	1	0	0	0	1	0	0	1
	ORTHOMCL6501	Serine/threonine protein phosphatase( EC:3.1.3.16 )	0	0	0	0	0	0	0	0	0	0	0	1	0	0	0	1	0	0	1
	ORTHOMCL6502	Rickettsia 17 kDa surface antigen.	0	0	0	0	0	0	0	0	0	0	0	1	0	0	0	1	0	0	1
	ORTHOMCL6528	Na+/H+-dicarboxylate symporters	0	0	0	0	0	0	0	0	0	0	0	1	0	0	0	0	1	1	1
	ORTHOMCL6529	Protein of unknown function (DUF2493).	0	0	0	0	0	0	0	0	0	0	0	1	0	0	0	1	0	0	1
	ORTHOMCL6530	hypothetical protein	0	0	0	0	0	0	0	0	0	0	0	1	0	0	0	1	0	0	1
	ORTHOMCL6537	Protein of unknown function DUF450	0	0	0	0	0	0	0	1	0	0	0	1	0	0	0	1	0	0	0
	ORTHOMCL6540	hypothetical protein	0	0	0	0	0	0	1	1	0	1	0	0	1	0	0	0	0	0	0
	ORTHOMCL6545	AraC-type DNA-binding domain-containing proteins	0	0	0	0	0	0	0	0	0	1	0	0	0	0	1	1	0	0	1
	ORTHOMCL6548	hypothetical protein	0	0	0	0	0	0	0	0	0	0	0	0	0	0	1	0	1	1	0
	ORTHOMCL6560	2-polyprenyl-6-methoxyphenol hydroxylase and related FAD-dependent oxidoreductases	0	0	0	0	1	1	0	1	0	0	0	0	0	1	0	0	0	0	0
	ORTHOMCL6577	short chain dehydrogenase	0	0	0	0	1	1	0	0	0	0	0	0	0	0	0	0	1	1	0
	ORTHOMCL6581	proteic killer protein, putative	0	0	0	0	0	0	0	0	1	0	1	1	0	0	0	0	0	0	1
	ORTHOMCL6624	Predicted acetamidase/formamidase	0	0	0	0	0	0	0	0	0	1	1	0	0	0	0	0	1	1	0
	ORTHOMCL6628	Uncharacterized protein conserved in bacteria, putative lipoprotein	0	0	0	0	1	1	0	1	0	0	0	0	0	0	0	1	0	0	0
	ORTHOMCL6654	Short-chain alcohol dehydrogenase of unknown specificity	0	0	0	0	0	0	0	0	0	1	0	0	0	0	1	1	0	0	1
	ORTHOMCL6704	Protein of unknown function (DUF2798).	0	0	0	0	1	1	1	1	0	0	0	0	0	0	0	0	0	0	0
	ORTHOMCL6705	Aminoglycoside phosphotransferase( EC:2.7.1.87 )	0	0	0	0	1	1	1	1	0	0	0	0	0	0	0	0	0	0	0
	ORTHOMCL6747	prenyltransferase, UbiA family	0	0	0	0	0	0	0	0	0	0	1	0	0	1	0	1	0	1	0
	ORTHOMCL6762	hypothetical protein	0	0	0	0	0	0	1	1	0	0	0	0	1	0	0	1	0	0	0
	ORTHOMCL6763	hypothetical protein	0	0	0	0	0	0	1	1	0	0	0	0	1	0	0	0	0	0	1
	ORTHOMCL6764	hypothetical protein	0	0	0	0	0	0	1	1	0	0	0	0	1	0	0	0	0	0	1
	ORTHOMCL6772	SdiA-regulated	0	0	0	0	0	0	0	0	0	0	0	0	1	0	1	1	0	0	1
	ORTHOMCL6773	hypothetical protein	0	0	0	0	0	0	0	0	1	0	1	0	1	0	0	0	0	0	1
	ORTHOMCL6833	Glutathione-dependent formaldehyde-activating, GFA	0	0	0	0	1	1	0	1	0	0	0	0	0	0	0	0	0	0	0
	ORTHOMCL6845	hypothetical protein	0	0	0	0	0	0	0	1	0	0	0	1	1	0	0	1	0	0	0
	ORTHOMCL6849	Histidine kinase-, DNA gyrase B-, and HSP90-like ATPase.	0	0	0	0	1	1	0	0	0	0	0	1	0	0	0	0	1	0	0
	ORTHOMCL6862	Predicted proteasome-type protease	0	0	0	0	0	0	0	0	0	0	0	1	1	0	0	1	0	0	1
	ORTHOMCL6869	FOG: EAL domain	0	0	0	0	0	0	0	0	0	0	0	1	1	0	0	1	0	0	0
	ORTHOMCL6875	hypothetical protein	0	0	0	0	0	0	0	0	0	0	0	1	0	0	0	1	0	0	1
	ORTHOMCL6891	FOG: CBS domain	0	0	0	0	0	0	0	0	0	0	0	1	0	0	0	1	0	0	1
	ORTHOMCL6927	ribose ABC transporter, ATP-binding protein( EC:3.6.3.17 )	0	0	0	0	0	0	0	0	1	0	1	0	0	0	0	0	1	1	0
	ORTHOMCL6928	ribose ABC transporter, periplasmic ribose-binding protein	0	0	0	0	0	0	0	0	1	0	1	0	0	0	0	0	1	1	0
	ORTHOMCL6942	putative phenylacetaldoxime dehydratase.( EC:4.99.1.7,EC:4.99.1.5 )	0	0	0	0	0	0	0	0	1	0	0	0	0	0	1	1	0	0	1
	ORTHOMCL6949	hypothetical protein	0	0	0	0	0	0	1	1	0	0	0	0	0	0	0	0	0	1	1
	ORTHOMCL6990	Transcriptional regulator	0	0	0	0	1	1	0	1	0	0	0	0	0	1	0	0	0	0	0
	ORTHOMCL6991	Ferredoxin subunits of nitrite reductase and ring-hydroxylating dioxygenases	0	0	0	0	1	1	0	1	0	0	0	0	0	1	0	0	0	0	0
	ORTHOMCL7013	hypothetical protein	0	0	0	0	1	1	1	0	0	0	0	0	0	0	0	0	0	0	0
	ORTHOMCL7037	hypothetical protein	0	0	0	0	1	1	0	1	0	0	1	0	0	0	0	0	0	0	0
	ORTHOMCL7038	Dehydrogenases (flavoproteins)	0	0	0	0	1	1	0	1	0	0	1	0	0	0	0	0	0	0	0
	ORTHOMCL7051	Transcriptional regulator	0	0	0	0	0	0	0	0	0	0	1	0	0	0	0	0	1	1	1
	ORTHOMCL7052	Fumarylacetoacetate (FAA) hydrolase family protein	0	0	0	0	0	0	0	0	0	0	1	0	0	0	0	0	1	1	1
	ORTHOMCL7059	similar to Uncharacterized protein conserved in bacteria	0	0	0	0	1	1	0	1	0	0	0	0	0	0	0	1	0	0	0
	ORTHOMCL7062	hypothetical protein	0	0	0	0	1	1	0	0	0	0	0	0	0	0	0	1	0	0	1
	ORTHOMCL7096	Cytochrome c, mono- and diheme variants	0	0	0	0	0	0	0	0	0	0	0	0	0	0	1	0	1	1	1
	ORTHOMCL7097	uroporphyrin-III C-methyltransferase( EC:2.1.1.107 )	0	0	0	0	0	0	0	0	0	0	0	0	0	0	1	0	1	1	1
	ORTHOMCL7098	heme d1 biosynthesis radical SAM protein NirJ	0	0	0	0	0	0	0	0	0	0	0	0	0	0	1	0	1	1	1
	ORTHOMCL7099	Transcriptional regulators	0	0	0	0	0	0	0	0	0	0	0	0	0	0	1	0	1	1	1
	ORTHOMCL7100	Transcriptional regulators	0	0	0	0	0	0	0	0	0	0	0	0	0	0	1	0	1	1	1
	ORTHOMCL7101	Transcriptional regulators	0	0	0	0	0	0	0	0	0	0	0	0	0	0	1	0	1	1	1
	ORTHOMCL7102	Transcriptional regulators	0	0	0	0	0	0	0	0	0	0	0	0	0	0	1	0	1	1	1
	ORTHOMCL7103	Uncharacterized conserved protein	0	0	0	0	0	0	0	0	0	0	0	0	0	0	1	0	1	1	1
	ORTHOMCL7104	Cytochrome c553	0	0	0	0	0	0	0	0	0	0	0	0	0	0	1	0	1	1	1
	ORTHOMCL7105	Cytochrome c, mono- and diheme variants( EC:1.7.99.1 )	0	0	0	0	0	0	0	0	0	0	0	0	0	0	1	0	1	1	1
	ORTHOMCL7116	Uncharacterized conserved protein	0	0	0	0	0	0	0	0	0	0	0	0	0	0	1	0	1	1	1
	ORTHOMCL7136	hypothetical protein	0	0	0	0	0	0	0	0	1	0	0	0	0	0	1	1	0	0	1
	ORTHOMCL7190	putative hydrolase signal peptide protein	0	0	0	0	1	1	0	0	1	0	0	0	0	0	0	1	0	0	0
	ORTHOMCL7191	hypothetical protein	0	0	0	0	1	1	0	0	1	0	0	0	0	0	0	1	0	0	0
	ORTHOMCL7192	4-oxalocrotonate tautomerase( EC:5.3.2.- )	0	0	0	0	1	1	0	0	1	0	0	0	0	0	0	1	0	0	0
	ORTHOMCL7202	hypothetical protein	0	0	0	0	1	1	1	1	0	0	0	0	0	0	0	0	0	0	0
	ORTHOMCL7211	N-acetylglutamate synthase and related acetyltransferases	0	0	0	0	1	1	1	1	0	0	0	0	0	0	0	0	0	0	0
	ORTHOMCL7215	hypothetical protein	0	0	0	0	1	1	1	1	0	0	0	0	0	0	0	0	0	0	0
	ORTHOMCL7218	Transcriptional regulator	0	0	0	0	1	1	1	1	0	0	0	0	0	0	0	0	0	0	0
	ORTHOMCL7275	Predicted hydrolases or acyltransferases (alpha/beta hydrolase superfamily)( EC:3.1.1.- )	0	0	0	0	0	0	0	1	0	0	1	0	0	1	0	0	0	0	1
	ORTHOMCL7279	Uncharacterized protein, possibly involved in utilization of glycolate and propanediol	0	0	0	0	1	1	0	1	0	0	0	0	0	1	0	0	0	0	0
	ORTHOMCL7280	Imidazolonepropionase and related amidohydrolases	0	0	0	0	1	1	0	1	0	0	0	0	0	1	0	0	0	0	0
	ORTHOMCL7281	Predicted metal-dependent hydrolase	0	0	0	0	1	1	0	1	0	0	0	0	0	1	0	0	0	0	0
	ORTHOMCL7283	hypothetical protein	0	0	0	0	1	1	0	0	0	0	0	0	0	1	0	1	0	0	0
	ORTHOMCL7284	Reverse transcriptase (RNA-dependent DNA polymerase).( EC:2.7.7.49 )	0	0	0	0	1	1	0	0	0	0	0	0	0	1	0	1	0	0	0
	ORTHOMCL7373	hypothetical protein	0	0	0	0	1	1	0	0	0	0	0	0	0	0	0	1	0	0	0
	ORTHOMCL7376	Protein of unknown function (DUF1375).	0	0	0	0	1	1	0	1	0	0	0	0	0	0	0	0	0	0	0
	ORTHOMCL7379	hypothetical protein	0	0	0	0	1	1	0	1	0	0	0	0	0	0	0	0	0	0	0
	ORTHOMCL7384	hypothetical protein	0	0	0	0	1	1	0	0	0	0	0	0	0	0	0	1	0	0	0
	ORTHOMCL7394	hypothetical protein	0	0	0	0	0	0	0	0	0	0	0	0	0	0	1	0	1	1	0
	ORTHOMCL7413	major facilitator family transporter	0	0	0	0	0	0	0	0	0	0	1	0	0	0	0	0	1	1	0
	ORTHOMCL7418	hypothetical protein	0	0	0	0	0	0	0	1	0	0	0	0	0	0	0	0	1	1	0
	ORTHOMCL7423	Uncharacterized protein conserved in bacteria	0	0	0	0	0	0	0	0	0	0	1	0	0	0	0	0	1	1	0
	ORTHOMCL7425	Protein of unknown function (DUF1266).	0	0	0	0	1	1	0	1	0	0	0	0	0	0	0	0	0	0	0
	ORTHOMCL7426	Predicted membrane protein	0	0	0	0	1	1	0	1	0	0	0	0	0	0	0	0	0	0	0
	ORTHOMCL7452	Uncharacterized conserved protein	0	0	0	0	0	0	0	0	0	0	0	1	0	0	0	0	0	1	1
	ORTHOMCL7461	Permeases of the drug/metabolite transporter (DMT) superfamily	0	0	0	0	0	0	0	0	0	0	0	1	0	0	0	1	0	0	1
	ORTHOMCL7464	hypothetical protein	0	0	0	0	0	0	0	1	0	0	0	1	0	0	1	1	0	0	0
	ORTHOMCL7469	Sugar phosphate permease	0	0	0	0	0	0	0	0	1	0	1	1	0	0	1	0	0	0	0
	ORTHOMCL7478	Putative translation initiation inhibitor, yjgF family	0	0	0	0	0	0	0	0	1	0	1	1	0	0	1	0	0	0	0
	ORTHOMCL7485	ABC-type amino acid transport/signal transduction systems, periplasmic component/domain	0	0	0	0	0	0	0	0	0	0	0	1	1	0	0	1	0	0	0
	ORTHOMCL7492	TonB-dependent siderophore receptor	0	0	0	0	1	1	1	1	0	0	0	0	0	0	0	0	0	0	0
	ORTHOMCL7514	Predicted ring-cleavage extradiol dioxygenase	0	0	0	0	0	0	0	0	1	0	0	1	0	0	0	1	1	0	0
	ORTHOMCL7569	nitrile hydratase, beta subunit( EC:4.2.1.84 )	0	0	0	0	0	0	0	0	1	0	0	0	0	0	1	1	0	0	1
	ORTHOMCL7570	nitrile hydratase, alpha subunit( EC:4.2.1.84 )	0	0	0	0	0	0	0	0	1	0	0	0	0	0	1	1	0	0	1
	ORTHOMCL7574	ABC-type sugar transport system, ATPase component( EC:3.6.3.17 )	0	0	0	0	0	0	0	0	0	1	0	0	0	0	1	1	0	0	1
	ORTHOMCL7575	Predicted ABC-type sugar transport system, permease component	0	0	0	0	0	0	0	0	0	1	0	0	0	0	1	1	0	0	1
	ORTHOMCL7576	ABC-type sugar transport system, periplasmic component	0	0	0	0	0	0	0	0	0	1	0	0	0	0	1	1	0	0	1
	ORTHOMCL7577	Transcriptional regulators	0	0	0	0	0	0	0	0	0	1	0	0	0	0	1	1	0	0	1
	ORTHOMCL7587	hypothetical protein	0	0	0	0	0	0	0	1	0	0	1	0	1	0	0	0	0	0	1
	ORTHOMCL7596	hypothetical protein	0	0	0	0	0	0	0	0	0	0	0	1	1	0	0	1	0	0	1
	ORTHOMCL7609	hypothetical protein	0	0	0	0	0	0	0	1	0	0	1	1	0	0	0	1	0	0	0
	ORTHOMCL7661	hypothetical protein	0	0	0	0	1	1	0	0	0	0	0	0	0	1	1	0	0	0	0
	ORTHOMCL7795	Protein of unknown function (DUF3298).	0	0	0	0	1	1	0	1	0	0	0	0	0	0	0	0	0	1	0
	ORTHOMCL7797	hypothetical protein	0	0	0	0	1	1	0	0	0	0	0	0	0	0	0	0	1	1	0
	ORTHOMCL7802	Predicted glutamine amidotransferases	0	0	0	0	0	0	0	1	0	0	1	0	0	0	0	0	1	1	0
	ORTHOMCL7811	Amidases related to nicotinamidase	0	0	0	0	0	0	0	0	0	1	1	0	0	0	0	0	1	1	0
	ORTHOMCL7814	Transcriptional regulator	0	0	0	0	1	1	0	0	0	1	1	0	0	0	0	0	0	0	0
	ORTHOMCL7815	hypothetical protein	0	0	0	0	0	0	0	0	0	1	1	0	0	0	0	0	1	1	0
	ORTHOMCL7821	hypothetical protein	0	0	0	0	0	0	0	1	0	0	0	0	0	0	0	1	0	1	1
	ORTHOMCL7824	hypothetical protein	0	0	0	0	1	1	0	1	0	0	0	0	0	0	0	1	0	0	0
	ORTHOMCL7827	hypothetical protein	0	0	0	0	1	1	0	1	0	0	0	0	0	0	0	1	0	0	0
	ORTHOMCL7888	oxygen-independent coproporphyrinogen III oxidase( EC:1.3.99.22 )	0	0	0	0	0	0	0	0	0	0	0	0	0	0	1	0	1	1	1
	ORTHOMCL7889	hypothetical protein	0	0	0	0	0	0	0	0	0	0	0	0	0	0	1	0	1	1	1
	ORTHOMCL7894	hypothetical protein	0	0	0	0	0	0	0	0	0	0	1	0	0	0	1	0	1	1	0
	ORTHOMCL7905	Uncharacterized protein probably involved in high-affinity Fe2+ transport	0	0	0	0	0	0	0	0	0	0	0	0	0	0	1	0	1	1	1
	ORTHOMCL7906	hypothetical protein	0	0	0	0	0	0	0	0	0	0	0	0	0	0	1	0	1	1	1
	ORTHOMCL7907	High-affinity Fe2+/Pb2+ permease	0	0	0	0	0	0	0	0	0	0	0	0	0	0	1	0	1	1	1
	ORTHOMCL7908	hypothetical protein	0	0	0	0	0	0	0	0	0	0	0	0	0	0	1	0	1	1	1
	ORTHOMCL7924	Panthothenate kinase	0	0	0	0	0	0	0	0	0	1	0	0	0	0	1	1	0	0	1
	ORTHOMCL7925	Sugar kinases, ribokinase family( EC:2.7.1.4 )	0	0	0	0	0	0	0	0	0	1	0	0	0	0	1	1	0	0	1
	ORTHOMCL7927	Electron transfer flavoprotein, alpha subunit	0	0	0	0	0	1	0	0	1	0	1	0	0	0	0	0	0	0	1
	ORTHOMCL7930	Predicted acyl-CoA transferases/carnitine dehydratase	0	0	0	0	1	1	0	0	1	0	0	0	0	0	0	1	0	0	0
	ORTHOMCL7940	Transcriptional regulator	0	0	0	0	0	0	0	0	1	0	1	0	0	0	0	0	1	1	0
	ORTHOMCL7941	Dehydrogenases with different specificities (related to short-chain alcohol dehydrogenases)	0	0	0	0	0	0	0	0	1	0	1	0	0	0	0	0	1	1	0
	ORTHOMCL7942	Coenzyme F420-dependent N5,N10-methylene tetrahydromethanopterin reductase and related flavin-dependent oxidoreductases	0	0	0	0	0	0	0	0	1	0	1	0	0	0	0	0	1	1	0
	ORTHOMCL7943	Transketolase, N-terminal subunit( EC:2.2.1.1 )	0	0	0	0	0	0	0	0	1	0	1	0	0	0	0	0	1	1	0
	ORTHOMCL7944	Transketolase, C-terminal subunit( EC:2.2.1.1 )	0	0	0	0	0	0	0	0	1	0	1	0	0	0	0	0	1	1	0
	ORTHOMCL7945	Nucleoside-diphosphate-sugar epimerases	0	0	0	0	0	0	0	0	1	0	1	0	0	0	0	0	1	1	0
	ORTHOMCL7946	Dehydrogenases with different specificities (related to short-chain alcohol dehydrogenases)	0	0	0	0	0	0	0	0	1	0	1	0	0	0	0	0	1	1	0
	ORTHOMCL7955	hypothetical protein	0	0	0	0	0	0	0	0	1	0	1	0	0	0	0	0	1	1	0
	ORTHOMCL7975	hypothetical protein	0	0	0	0	0	0	0	0	1	0	0	0	0	0	1	1	0	0	1
	ORTHOMCL7992	Carbohydrate-selective porin	0	0	0	0	1	1	0	0	1	0	0	0	0	0	0	1	0	0	0
	ORTHOMCL7993	Sugar phosphate isomerases/epimerases	0	0	0	0	1	1	0	0	1	0	0	0	0	0	0	1	0	0	0
	ORTHOMCL7994	Sugar phosphate isomerases/epimerases	0	0	0	0	1	1	0	0	1	0	0	0	0	0	0	1	0	0	0
	ORTHOMCL8000	hypothetical protein	0	0	0	0	0	0	0	0	1	1	0	0	0	0	0	0	1	1	0
	ORTHOMCL8003	hypothetical protein	0	0	0	0	1	1	1	0	0	0	0	0	0	0	0	0	0	1	0
	ORTHOMCL8005	Transposase.	0	0	0	0	0	0	1	0	1	0	0	0	0	0	1	0	0	1	0
	ORTHOMCL8006	hypothetical protein	0	0	0	0	1	1	1	1	0	0	0	0	0	0	0	0	0	0	0
	ORTHOMCL8008	Predicted amidophosphoribosyltransferases	0	0	0	0	1	1	1	0	0	0	0	0	0	0	0	0	1	0	0
	ORTHOMCL8011	hypothetical protein	0	0	0	0	1	1	1	1	0	0	0	0	0	0	0	0	0	0	0
	ORTHOMCL8014	hypothetical protein	0	0	0	0	1	1	1	1	0	0	0	0	0	0	0	0	0	0	0
	ORTHOMCL8015	hypothetical protein	0	0	0	0	1	1	1	1	0	0	0	0	0	0	0	0	0	0	0
	ORTHOMCL8016	hypothetical protein	0	0	0	0	1	1	1	1	0	0	0	0	0	0	0	0	0	0	0
	ORTHOMCL8017	Predicted ATP-dependent endonuclease of the OLD family	0	0	0	0	1	1	1	1	0	0	0	0	0	0	0	0	0	0	0
	ORTHOMCL8020	hypothetical protein	0	0	0	0	0	0	1	0	1	0	1	0	0	0	0	0	0	0	1
	ORTHOMCL8021	hypothetical protein	0	0	0	0	1	1	1	0	0	0	0	0	0	0	0	0	0	0	1
	ORTHOMCL8022	hypothetical protein	0	0	0	0	1	1	1	1	0	0	0	0	0	0	0	0	0	0	0
	ORTHOMCL8023	hypothetical protein	0	0	0	0	1	1	1	0	0	0	0	0	0	0	1	0	0	0	0
	ORTHOMCL8070	Predicted transcriptional regulator	0	0	0	0	0	0	0	0	1	0	1	0	0	1	0	1	0	0	0
	ORTHOMCL8072	hypothetical protein	0	0	0	0	0	0	0	0	0	0	0	0	0	1	0	1	1	0	1
	ORTHOMCL8078	ATPase family associated with various cellular activities (AAA).	0	0	0	0	0	0	0	0	0	1	1	0	0	1	0	0	1	0	0
	ORTHOMCL8088	Nucleoside-diphosphate-sugar epimerases( EC:5.1.3.2 )	0	0	0	0	1	1	0	0	0	0	0	0	0	1	1	0	0	0	0
	ORTHOMCL8094	ABC-type antimicrobial peptide transport system, permease component	0	0	0	0	0	0	0	0	1	0	0	0	0	1	0	0	1	1	0
	ORTHOMCL8095	ABC-type antimicrobial peptide transport system, permease component	0	0	0	0	0	0	0	0	1	0	0	0	0	1	0	0	1	1	0
	ORTHOMCL8096	ABC-type antimicrobial peptide transport system, ATPase component	0	0	0	0	0	0	0	0	1	0	0	0	0	1	0	0	1	1	0
	ORTHOMCL8097	RND family efflux transporter, MFP subunit	0	0	0	0	0	0	0	0	1	0	0	0	0	1	0	0	1	1	0
	ORTHOMCL8103	ABC-type amino acid transport/signal transduction systems, periplasmic component/domain	0	0	0	0	0	0	0	1	1	1	0	0	0	1	0	0	0	0	0
	ORTHOMCL8109	hypothetical protein	0	0	0	0	1	1	1	0	0	0	0	0	0	1	0	0	0	0	0
	ORTHOMCL8130	hypothetical protein	0	0	0	0	0	0	0	0	1	0	0	0	0	1	0	0	1	1	0
	ORTHOMCL8141	Dioxygenases related to 2-nitropropane dioxygenase	0	0	0	0	0	0	0	0	0	0	1	0	0	1	0	0	1	1	0
	ORTHOMCL8142	NAD-dependent aldehyde dehydrogenases( EC:1.2.1.68 )	0	0	0	0	0	0	0	0	1	1	1	0	0	1	0	0	0	0	0
	ORTHOMCL8156	hypothetical protein	0	0	0	0	0	0	0	0	0	0	0	0	1	0	0	1	1	0	1
	ORTHOMCL8157	hypothetical protein	0	0	0	0	0	0	0	0	0	0	0	0	1	0	0	1	1	0	1
	ORTHOMCL8164	VRR-NUC domain.	0	0	0	0	1	1	1	0	0	0	0	0	1	0	0	0	0	0	0
	ORTHOMCL8169	dTDP-4-dehydrorhamnose 3,5-epimerase( EC:5.1.3.13 )	0	0	0	0	0	0	0	0	1	0	0	0	1	0	0	1	0	0	1
	ORTHOMCL8170	Uncharacterized protein conserved in bacteria	0	0	0	0	0	0	0	0	0	0	1	0	1	0	1	0	0	0	1
	ORTHOMCL8179	hypothetical protein	0	0	0	0	0	0	0	1	0	0	0	0	1	0	0	1	1	0	0
	ORTHOMCL8180	NADH:flavin oxidoreductases, Old Yellow Enzyme family( EC:1.3.1.34 )	0	0	0	0	1	1	1	0	0	0	0	0	1	0	0	0	0	0	0
	ORTHOMCL8181	Dehydrogenases with different specificities (related to short-chain alcohol dehydrogenases)	0	0	0	0	1	1	1	0	0	0	0	0	1	0	0	0	0	0	0
	ORTHOMCL8182	Pyrroline-5-carboxylate reductase	0	0	0	0	0	0	0	0	0	0	0	0	1	1	0	0	1	1	0
	ORTHOMCL8183	Predicted hydrolases or acyltransferases (alpha/beta hydrolase superfamily)	0	0	0	0	1	1	0	0	0	0	1	0	1	0	0	0	0	0	0
	ORTHOMCL8184	Acetyltransferases	0	0	0	0	1	1	0	1	0	0	0	0	1	0	0	0	0	0	0
	ORTHOMCL8185	Uncharacterized conserved protein	0	0	0	0	0	0	0	0	1	0	1	0	1	0	1	0	0	0	0
	ORTHOMCL8208	hypothetical protein	0	0	0	0	0	0	0	0	0	0	1	0	0	0	1	0	0	1	0
	ORTHOMCL8237	Protein of unknown function (DUF1479).	0	0	0	0	1	1	1	0	0	0	0	0	0	0	0	0	0	0	0
	ORTHOMCL8238	AraC-type DNA-binding domain-containing proteins	0	0	0	0	1	1	1	0	0	0	0	0	0	0	0	0	0	0	0
	ORTHOMCL8263	hypothetical protein	0	0	0	0	0	0	0	1	0	0	1	1	0	0	0	1	0	0	0
	ORTHOMCL8264	hypothetical protein	0	0	0	0	0	0	1	0	0	0	0	1	0	0	0	1	0	0	1
	ORTHOMCL8265	hypothetical protein	0	0	0	0	0	0	0	0	0	0	0	1	0	1	0	1	0	0	1
	ORTHOMCL8266	Methyl-accepting chemotaxis protein	0	0	0	0	0	0	0	0	0	0	0	1	1	0	0	1	0	0	1
	ORTHOMCL8267	hypothetical protein	0	0	0	0	0	0	0	0	0	0	0	1	1	0	0	1	0	0	1
	ORTHOMCL8268	hypothetical protein	0	0	0	0	0	0	0	0	0	0	0	1	1	0	0	1	0	0	1
	ORTHOMCL8270	Trimethylamine:corrinoid methyltransferase( EC:2.1.1.- )	0	0	0	0	0	0	0	0	0	0	0	1	0	0	1	1	0	0	1
	ORTHOMCL8271	Predicted flavoprotein	0	0	0	0	0	0	0	0	0	0	0	1	1	0	1	1	0	0	0
	ORTHOMCL8273	Flavodoxins	0	0	0	0	1	1	0	1	0	0	0	1	0	0	0	0	0	0	0
	ORTHOMCL8274	hypothetical protein	0	0	0	0	0	0	0	0	0	1	0	1	0	0	0	0	1	0	0
	ORTHOMCL8290	NADH:flavin oxidoreductases, Old Yellow Enzyme family	0	0	0	0	0	0	0	0	0	0	0	1	0	0	1	1	0	0	1
	ORTHOMCL8291	Transcriptional regulator	0	0	0	0	0	0	0	0	0	0	0	1	0	0	1	1	0	0	1
	ORTHOMCL8292	hypothetical protein	0	0	0	0	0	0	0	0	0	0	0	1	1	0	0	1	0	0	1
	ORTHOMCL8293	ATPases involved in chromosome partitioning	0	0	0	0	0	0	0	0	0	0	0	1	1	0	0	1	0	0	1
	ORTHOMCL8294	hypothetical protein	0	0	0	0	0	0	0	0	0	0	0	1	1	0	0	1	0	0	1
	ORTHOMCL8295	Predicted hydrolases or acyltransferases (alpha/beta hydrolase superfamily)	0	0	0	0	0	0	0	0	0	0	0	1	1	0	0	1	0	0	1
	ORTHOMCL8298	hypothetical protein	0	0	0	0	0	0	0	1	0	0	0	1	0	1	0	1	0	0	0
	ORTHOMCL8301	hypothetical protein	0	0	0	0	0	0	0	0	0	0	0	1	0	0	0	1	0	1	1
	ORTHOMCL8307	phosphonoacetaldehyde hydrolase( EC:3.11.1.1 )	0	0	0	0	0	0	0	0	1	0	1	1	0	0	1	0	0	0	0
	ORTHOMCL8308	2-aminoethylphosphonate--pyruvate transaminase( EC:2.6.1.37 )	0	0	0	0	0	0	0	0	1	0	1	1	0	0	1	0	0	0	0
	ORTHOMCL8309	Colicin immunity protein / pyocin immunity protein./S-type Pyocin.	0	0	0	0	0	0	0	0	1	0	0	1	0	0	0	1	0	0	1
	ORTHOMCL8315	hypothetical protein	0	0	0	0	0	0	0	0	0	0	0	1	0	1	0	1	0	0	1
	ORTHOMCL8316	hypothetical protein	0	0	0	0	0	0	0	0	0	0	0	1	1	0	0	1	0	0	1
	ORTHOMCL8317	tmRNA	0	0	0	0	0	0	0	0	0	0	0	1	1	0	0	1	0	0	1
	ORTHOMCL8318	hypothetical protein	0	0	0	0	0	0	0	0	0	0	0	1	1	0	0	1	0	0	1
	ORTHOMCL8328	40-residue YVTN family beta-propeller repeat	0	0	0	0	0	0	0	0	0	0	0	1	1	0	0	1	0	0	1
	ORTHOMCL8332	hypothetical protein	0	0	0	0	0	0	0	0	0	0	0	1	1	0	0	1	0	0	1
	ORTHOMCL8333	hypothetical protein	0	0	0	0	0	0	1	1	0	0	0	1	0	0	0	1	0	0	0
	ORTHOMCL8334	aminoethylphosphonate catabolism associated LysR family transcriptional regulator	0	0	0	0	0	0	0	0	1	0	1	1	0	0	1	0	0	0	0
	ORTHOMCL8336	hypothetical protein	0	0	0	0	0	0	1	0	0	0	0	1	0	0	0	1	0	0	0
	ORTHOMCL8337	Predicted carbamoyl transferase, NodU family( EC:2.1.3.- )	0	0	0	0	0	0	1	0	0	0	0	1	0	0	0	1	0	0	0
	ORTHOMCL8338	hypothetical protein	0	0	0	0	0	0	0	0	0	0	0	1	1	0	0	1	0	0	1
	ORTHOMCL8342	hypothetical protein	0	0	0	0	0	0	0	0	0	0	1	1	1	1	0	0	0	0	0
	ORTHOMCL8343	hypothetical protein	0	0	0	0	1	1	1	0	0	0	0	1	0	0	0	0	0	0	0
	ORTHOMCL8344	hypothetical protein	0	0	0	0	0	0	1	1	0	0	0	1	0	0	1	0	0	0	0
	ORTHOMCL8345	hypothetical protein	0	0	0	0	0	0	0	0	0	0	0	1	0	0	0	1	0	0	1
	ORTHOMCL8346	Lipopolysaccharide biosynthesis proteins, LPS:glycosyltransferases	0	0	0	0	0	0	0	0	0	0	0	1	0	0	1	1	0	0	1
	ORTHOMCL4180	Protein of unknown function (DUF3300).	1	1	2	1	0	0	0	0	1	1	1	1	0	1	1	1	1	1	1
	ORTHOMCL194	DNA-binding response regulator, LuxR family	2	1	2	2	0	0	1	0	1	1	2	0	0	1	2	1	2	2	1
	ORTHOMCL4845	hypothetical protein	1	0	0	0	2	2	1	2	1	0	1	1	0	0	1	1	0	0	1
	ORTHOMCL4000	hypothetical protein	1	1	1	2	1	1	1	0	2	0	0	0	0	2	2	0	1	1	0
	ORTHOMCL4144	hypothetical protein	1	1	1	1	1	1	0	1	1	1	2	0	0	1	0	0	1	1	0
	ORTHOMCL6081	Na+/citrate symporter	1	2	1	0	0	0	0	0	0	1	0	0	0	1	0	0	0	0	0
	ORTHOMCL5376	Predicted transcriptional regulators	0	1	1	1	0	0	0	0	1	1	1	0	0	0	0	0	0	0	0
	ORTHOMCL5377	NADH:flavin oxidoreductases, Old Yellow Enzyme family	0	1	1	1	0	0	0	0	1	1	1	0	0	0	0	0	0	0	0
	ORTHOMCL5378	Spermidine/putrescine-binding periplasmic protein	0	1	1	1	0	0	0	0	1	1	1	0	0	0	0	0	0	0	0
	ORTHOMCL5763	Zn-dependent hydrolases, including glyoxylases	1	1	1	1	0	0	1	0	0	0	0	0	0	0	1	1	0	0	1
	ORTHOMCL6074	hypothetical protein	0	1	1	1	0	0	0	0	1	1	0	0	0	1	1	0	0	0	0
	ORTHOMCL4024	Flp pilus assembly protein CpaB family	1	0	0	0	1	1	1	1	1	0	1	1	1	0	1	1	0	0	1
	ORTHOMCL4025	hypothetical protein	1	0	0	0	1	1	1	1	1	0	1	1	1	0	1	1	0	0	1
	ORTHOMCL4026	general secretion pathway/type 4 pilus assembly protein	1	0	0	0	1	1	1	1	1	0	1	1	1	0	1	1	0	0	1
	ORTHOMCL4027	type II secretion system protein F domain protein	1	0	0	0	1	1	1	1	1	0	1	1	1	0	1	1	0	0	1
	ORTHOMCL4028	type II secretion system protein F domain	1	0	0	0	1	1	1	1	1	0	1	1	1	0	1	1	0	0	1
	ORTHOMCL4111	ABC transporter, permease protein	1	0	0	0	1	1	1	1	0	0	1	1	1	1	0	1	1	1	0
	ORTHOMCL4135	response regulator	1	0	0	0	1	1	1	1	1	0	1	1	1	0	1	1	0	0	1
	ORTHOMCL4186	twitching motility protein	1	0	0	0	1	1	1	1	0	0	1	1	1	0	1	1	1	1	1
	ORTHOMCL4240	transcriptional regulator, LysR family	1	0	0	0	1	1	0	1	0	1	1	1	1	1	1	1	1	1	0
	ORTHOMCL4362	pupR protein	0	0	0	1	1	1	0	1	0	0	1	1	1	0	1	1	1	1	1
	ORTHOMCL4454	hypothetical protein	1	0	0	0	1	1	0	1	1	1	0	1	1	0	0	1	1	1	1
	ORTHOMCL4547	FOG: EAL domain	1	0	0	0	1	1	1	1	0	0	1	1	1	0	0	1	1	1	1
	ORTHOMCL4630	hypothetical protein( EC:3.1.1.3 )	1	0	0	0	1	1	1	1	0	1	0	1	1	1	1	1	0	0	1
	ORTHOMCL4696	diaminopimelate epimerase( EC:5.1.1.7 )	0	0	1	0	1	1	0	1	0	0	1	1	1	0	1	1	1	1	1
	ORTHOMCL4798	Uncharacterized conserved protein	1	0	0	0	1	1	0	1	1	1	1	1	1	1	0	1	1	1	0
	ORTHOMCL4808	hypothetical protein	1	0	0	0	1	1	0	1	0	0	1	1	1	1	1	1	1	1	1
	ORTHOMCL4811	transcriptional regulator	0	0	1	0	0	0	0	1	1	1	1	1	1	1	1	1	1	1	1
	ORTHOMCL4864	Predicted acetyltransferase	1	0	0	0	1	1	1	1	0	0	1	1	1	0	1	1	1	1	1
	ORTHOMCL62	class II aldolase/adducin domain protein	1	5	3	4	0	0	0	0	2	2	2	2	2	1	1	2	1	1	0
	ORTHOMCL1388	polyphosphate kinase 2, PA0141 family	1	2	2	1	1	1	0	1	1	1	1	1	0	1	1	1	1	1	1
	ORTHOMCL75	RNA polymerase sigma-70 factor, ECF subfamily	1	0	1	1	1	1	1	1	0	1	2	1	1	0	2	2	3	3	2
	ORTHOMCL4850	hypothetical protein	0	0	1	0	0	0	0	0	1	0	1	2	1	0	2	1	2	2	1
	ORTHOMCL5140	Outer membrane receptor proteins, mostly Fe transport	0	1	1	1	0	0	0	0	0	0	0	0	1	1	0	0	0	0	2
	ORTHOMCL4635	hypothetical protein	1	0	0	0	1	1	1	1	0	0	1	2	1	1	1	1	0	0	1
	ORTHOMCL6118	hypothetical protein	0	0	0	0	0	0	2	0	0	0	1	0	0	0	1	0	0	0	0
	ORTHOMCL6131	hypothetical protein	0	0	0	0	2	2	0	0	0	0	0	0	0	0	0	0	1	0	0
	ORTHOMCL4565	hypothetical protein	0	0	0	0	0	0	1	1	0	0	0	0	0	0	5	0	4	2	0
	ORTHOMCL178	ISPsy24, transposase orfB	1	1	1	2	0	0	1	0	2	0	1	0	0	1	1	1	0	1	0
	ORTHOMCL5373	hypothetical protein	0	0	0	0	1	1	0	2	0	0	0	0	1	0	0	0	0	0	0
	ORTHOMCL5658	glutathione S-transferase( EC:2.5.1.18 )	0	0	0	0	0	0	0	0	0	0	0	0	0	1	2	0	1	1	0
	ORTHOMCL6066	ISPsy22, transposase truncated	0	0	0	0	0	0	0	0	0	1	0	0	0	2	1	1	0	0	0
	ORTHOMCL6558	2-keto-4-pentenoate hydratase/2-oxohepta-3-ene-1,7-dioic acid hydratase (catechol pathway)	0	0	0	0	1	1	0	1	0	0	0	0	0	2	0	0	0	0	0
	ORTHOMCL6671	Shikimate 5-dehydrogenase( EC:1.1.1.25 )	0	0	0	0	0	0	0	0	1	0	2	0	0	0	0	0	1	0	1
	ORTHOMCL6761	hypothetical protein	0	0	0	0	0	0	0	1	0	0	2	0	1	0	1	0	0	0	0
	ORTHOMCL6842	Sterol desaturase	0	0	0	0	0	0	0	0	0	0	0	1	0	2	0	0	0	0	1
	ORTHOMCL6899	hypothetical protein	0	0	0	0	0	0	0	0	0	0	0	1	0	0	0	1	0	0	2
	ORTHOMCL6906	hypothetical protein	0	0	0	0	0	0	0	0	0	0	0	2	0	0	0	0	0	1	1
	ORTHOMCL6914	hypothetical protein	0	0	0	0	2	1	0	0	0	0	0	0	1	1	0	0	0	0	0
	ORTHOMCL7196	hypothetical protein	0	0	0	0	2	1	1	1	0	0	0	0	0	0	0	0	0	0	0
	ORTHOMCL7374	Predicted acyl-CoA transferases/carnitine dehydratase	0	0	0	0	0	0	0	0	1	0	2	0	0	1	0	0	0	0	0
	ORTHOMCL7410	Short-chain alcohol dehydrogenase of unknown specificity	0	0	0	0	0	0	0	0	0	0	0	0	1	0	0	1	2	0	0
	ORTHOMCL7491	hypothetical protein	0	0	0	0	1	1	0	2	0	0	0	1	0	0	0	0	0	0	0
	ORTHOMCL3340	cupin family protein	0	1	1	1	2	2	1	2	1	2	1	1	1	1	1	0	1	1	1
	ORTHOMCL3651	NADH dehydrogenase, FAD-containing subunit( EC:1.6.99.3 )	2	1	1	1	0	0	1	1	1	1	2	0	0	1	1	1	1	1	1
	ORTHOMCL5058	oxidoreductase, aldo/keto reductase family	1	2	1	1	0	0	0	0	0	0	0	0	0	2	0	0	0	1	0
	ORTHOMCL312	hypothetical protein	1	1	1	0	2	1	2	2	0	0	2	3	5	3	0	3	0	0	1
	ORTHOMCL4568	sensor histidine kinase	1	2	2	1	0	0	1	0	0	0	0	0	0	0	1	1	0	0	1
	ORTHOMCL4933	outer-membrane fimbrial usher protein	2	2	1	1	0	0	0	0	1	0	0	0	0	0	0	0	1	0	1
	ORTHOMCL5321	P pilus assembly protein, chaperone PapD	2	2	1	1	0	0	0	0	1	0	0	0	0	0	0	0	1	0	1
	ORTHOMCL3753	Phage integrase:Phage integrase, N-terminal SAM-like	0	0	0	0	0	0	1	3	0	1	2	0	1	0	2	0	0	1	1
	ORTHOMCL3654	insecticidal toxin complex protein, putative	1	1	0	0	3	2	0	1	1	0	1	0	2	1	1	1	0	1	2
	ORTHOMCL109	filamentous hemagglutinin	1	0	0	0	0	0	0	0	0	0	0	6	4	0	0	0	0	3	3
	ORTHOMCL7221	Response regulator	1	1	1	0	0	0	0	0	0	0	0	0	0	0	0	0	0	0	0
	ORTHOMCL7848	hypothetical protein	0	1	1	1	0	0	0	0	0	0	0	0	0	0	0	0	0	0	0
	ORTHOMCL9010	DNA-binding winged-HTH domains	0	1	1	1	0	0	0	0	0	0	0	0	0	0	0	0	0	0	0
	ORTHOMCL9016	hypothetical protein	0	1	1	1	0	0	0	0	0	0	0	0	0	0	0	0	0	0	0
	ORTHOMCL9044	hypothetical protein	0	1	1	1	0	0	0	0	0	0	0	0	0	0	0	0	0	0	0
	ORTHOMCL9049	Dehydrogenases with different specificities (related to short-chain alcohol dehydrogenases)	0	1	1	0	0	0	0	0	0	0	0	0	0	0	0	0	0	0	0
	ORTHOMCL9065	hypothetical protein( EC:2.3.1.47 )	0	1	1	1	0	0	0	0	0	0	0	0	0	0	0	0	0	0	0
	ORTHOMCL9222	hypothetical protein	1	1	1	0	0	0	0	0	0	0	0	0	0	0	0	0	0	0	0
	ORTHOMCL9253	Arabinose efflux permease	1	0	1	0	0	0	0	0	0	0	0	0	0	0	0	0	0	0	0
	ORTHOMCL4334	oxidoreductase, putative	1	1	1	1	1	1	0	0	1	0	0	0	0	0	1	1	0	0	0
	ORTHOMCL5555	peroxiredoxin, Ohr subfamily	1	1	1	1	0	0	0	0	1	1	1	0	0	1	0	0	1	0	0
	ORTHOMCL5558	Zn-dependent alcohol dehydrogenases( EC:1.- )	1	1	1	1	0	0	1	1	1	1	0	0	1	0	0	0	0	0	0
	ORTHOMCL5619	alkylhydroperoxidase AhpD family core domain	1	1	1	1	0	0	0	0	0	0	0	1	0	0	1	1	0	0	1
	ORTHOMCL3563	TonB-dependent receptor:TonB-dependent receptor	1	0	0	0	1	1	1	1	0	0	1	1	1	0	0	1	1	1	0
	ORTHOMCL4116	manganese transport protein MntH	1	0	0	0	1	1	1	1	0	0	1	0	1	1	0	1	1	1	0
	ORTHOMCL4222	hypothetical protein	1	0	0	0	1	1	1	1	0	0	1	1	1	0	0	1	1	1	0
	ORTHOMCL4223	predicted periplasmic lipoprotein	1	0	0	0	1	1	1	1	0	0	1	1	1	0	0	1	1	1	0
	ORTHOMCL4224	dyp-type peroxidase family protein	1	0	0	0	1	1	1	1	0	0	1	1	1	0	0	1	1	1	0
	ORTHOMCL4225	Predicted periplasmic lipoprotein involved in iron transport	1	0	0	0	1	1	1	1	0	0	1	1	1	0	0	1	1	1	0
	ORTHOMCL4267	CigR	1	0	0	0	1	1	1	1	0	1	1	1	0	0	0	1	1	1	0
	ORTHOMCL4379	mandelate racemase/muconate lactonizing enzyme family protein( EC:4.2.1.40 )	1	0	0	0	1	1	0	1	0	1	0	1	1	1	1	1	1	1	0
	ORTHOMCL4670	hypothetical protein	0	0	1	0	0	0	0	0	1	1	1	1	1	0	1	1	1	1	1
	ORTHOMCL4723	hypothetical protein	0	1	0	0	1	1	1	1	0	0	1	1	0	1	0	1	1	0	1
	ORTHOMCL4847	P-aminobenzoate N-oxygenase AurF.	1	0	0	0	1	1	1	1	1	0	0	1	1	1	1	1	0	0	1
	ORTHOMCL5028	hypothetical protein	1	0	0	0	1	1	1	1	0	1	0	1	1	0	0	1	1	1	1
	ORTHOMCL5769	NAD-dependent aldehyde dehydrogenases( EC:1.2.1.21,EC:1.2.1.22 )	1	1	1	2	0	0	0	0	0	1	1	0	0	0	0	0	0	1	1
	ORTHOMCL5805	hypothetical protein	0	1	1	1	0	0	0	0	0	0	1	0	0	2	0	0	1	0	0
	ORTHOMCL66	serine protease( EC:3.4.21.- )	2	0	0	1	2	2	2	2	1	2	1	2	1	2	0	2	0	0	2
	ORTHOMCL4754	transporter, SSS family	0	0	0	1	0	0	0	0	1	1	2	0	0	1	2	0	2	2	1
	ORTHOMCL2930	methyl-accepting chemotaxis protein	1	1	1	1	1	1	1	1	1	0	0	1	1	0	1	1	1	1	1
	ORTHOMCL3240	hypothetical protein	1	1	1	1	1	1	1	0	1	1	0	1	1	1	0	1	1	1	1
	ORTHOMCL3307	hypothetical protein	1	1	1	1	1	1	1	1	1	1	0	1	1	0	0	1	1	1	1
	ORTHOMCL3369	0	1	1	1	1	1	1	1	1	1	1	0	1	1	0	1	1	1	0	1
	ORTHOMCL3559	Transcriptional regulator	1	1	1	1	1	1	1	1	1	1	0	1	1	1	1	1	0	0	1
	ORTHOMCL3691	EamA-like transporter family.	1	1	1	1	1	1	1	1	1	1	0	1	1	0	1	1	1	1	0
	ORTHOMCL5604	Transposase IS116/IS110/IS902 family./Transposase.	0	0	0	0	0	0	0	0	0	0	0	1	0	0	0	1	0	0	1
	ORTHOMCL5931	hydrolase, HAD-superfamily, subfamily IB	0	0	0	0	0	0	0	1	0	0	0	0	1	0	0	0	0	0	1
	ORTHOMCL5944	hypothetical protein	0	0	0	0	0	0	0	1	0	0	0	1	0	0	0	1	0	0	0
	ORTHOMCL5969	glycosyl transferase, group 2 family protein( EC:2.4.1.- )	0	0	0	0	0	0	0	0	1	0	0	0	0	1	0	0	0	0	0
	ORTHOMCL5994	hypothetical protein	0	0	0	0	1	1	0	1	0	0	0	0	0	0	0	0	0	0	0
	ORTHOMCL6122	hypothetical protein	0	0	0	0	0	0	0	1	0	0	0	0	0	0	1	0	0	0	0
	ORTHOMCL6211	aldo-keto reductase family protein	0	0	0	0	1	1	0	1	0	0	0	0	0	0	0	0	0	0	0
	ORTHOMCL6214	acetyltransferase, GNAT family	0	0	0	0	1	1	0	1	0	0	0	0	0	0	0	0	0	0	0
	ORTHOMCL6229	hypothetical protein	0	0	0	0	0	0	0	1	0	0	0	1	0	0	0	0	0	0	1
	ORTHOMCL6230	senescence marker protein-30 family protein( EC:3.1.1.17 )	0	0	0	0	1	1	0	1	0	0	0	0	0	0	0	0	0	0	0
	ORTHOMCL6269	Predicted ornithine cyclodeaminase, mu-crystallin homolog( EC:4.3.1.12 )	0	0	0	0	0	0	0	1	1	0	0	0	0	0	0	0	0	0	0
	ORTHOMCL6292	hypothetical protein	0	0	0	0	0	0	0	0	0	1	0	0	0	0	0	0	1	1	0
	ORTHOMCL6332	hypothetical protein	0	0	0	0	1	1	1	0	0	0	0	0	0	0	0	0	0	0	0
	ORTHOMCL6335	exopolysaccharide production protein ExoZ, putative	0	0	0	0	1	1	1	0	0	0	0	0	0	0	0	0	0	0	0
	ORTHOMCL6393	transcriptional regulator, TetR family	0	0	0	0	0	0	0	0	0	0	0	0	1	0	0	1	0	0	1
	ORTHOMCL6462	hypothetical protein	0	0	0	0	0	0	0	0	0	0	0	1	0	0	0	1	0	0	1
	ORTHOMCL6519	hypothetical protein	0	0	0	0	0	0	1	1	0	0	0	0	0	1	0	0	0	0	0
	ORTHOMCL6520	hypothetical protein	0	0	0	0	0	0	1	0	0	0	0	0	0	0	0	1	0	0	1
	ORTHOMCL6521	hypothetical protein	0	0	0	0	0	0	0	0	0	0	0	0	1	0	1	0	0	0	1
	ORTHOMCL6587	Gluconate transporter	0	0	0	0	1	1	1	0	0	0	0	0	0	0	0	0	0	0	0
	ORTHOMCL6606	hypothetical protein	0	0	0	0	1	1	0	1	0	0	0	0	0	0	0	0	0	0	0
	ORTHOMCL6610	HAD-superfamily hydrolase, subfamily IA	0	0	0	0	1	1	0	1	0	0	0	0	0	0	0	0	0	0	0
	ORTHOMCL6620	Histidine kinase-, DNA gyrase B-, and HSP90-like ATPase./Histidine kinase./HAMP domain.( EC:2.7.13.3 )	0	0	0	0	0	0	0	0	0	0	1	0	0	0	0	0	1	1	0
	ORTHOMCL6621	Response regulator containing a CheY-like receiver domain and an HTH DNA-binding domain	0	0	0	0	0	0	0	0	0	0	1	0	0	0	0	0	1	1	0
	ORTHOMCL6622	Uncharacterized low-complexity proteins	0	0	0	0	0	0	0	0	0	0	1	0	0	0	0	0	1	1	0
	ORTHOMCL6701	hypothetical protein	0	0	0	0	1	1	1	0	0	0	0	0	0	0	0	0	0	0	0
	ORTHOMCL6815	hypothetical protein	0	0	0	0	0	0	0	1	0	0	0	0	0	0	1	0	0	0	0
	ORTHOMCL6819	prevent-host-death family protein	0	0	0	0	0	0	0	0	0	0	1	0	0	1	0	0	0	0	0
	ORTHOMCL6826	fatty acid desaturase family protein	0	0	0	0	0	0	0	0	1	0	0	0	0	1	0	0	0	0	0
	ORTHOMCL6839	hypothetical protein	0	0	0	0	0	0	0	1	0	0	0	1	1	0	0	0	0	0	0
	ORTHOMCL6868	sugar transporter family protein	0	0	0	0	0	0	0	0	0	0	1	1	0	0	0	0	0	0	1
	ORTHOMCL6888	transcriptional regulator	0	0	0	0	0	0	0	0	0	0	0	1	0	0	0	0	0	0	1
	ORTHOMCL6901	Uncharacterized protein conserved in bacteria	0	0	0	0	1	1	0	0	0	0	0	0	0	1	0	0	0	0	0
	ORTHOMCL6902	Uncharacterized conserved protein	0	0	0	0	0	0	0	0	0	0	0	1	0	0	0	1	0	0	1
	ORTHOMCL6903	hypothetical protein	0	0	0	0	0	0	1	0	0	1	0	0	1	0	0	0	0	0	0
	ORTHOMCL6925	oxidoreductase, short chain dehydrogenase/reductase family( EC:1.1.1.125 )	0	0	0	0	0	0	0	0	0	1	1	0	0	0	0	0	1	0	0
	ORTHOMCL6938	Dehydrogenases with different specificities (related to short-chain alcohol dehydrogenases)( EC:1.1.1.100 )	0	0	0	0	0	0	0	0	0	0	0	1	0	1	0	0	0	0	0
	ORTHOMCL6939	Response regulator containing a CheY-like receiver domain and an HTH DNA-binding domain	0	0	0	0	0	0	0	0	0	1	0	1	0	0	0	0	0	0	0
	ORTHOMCL6945	Protein involved in meta-pathway of phenol degradation	0	0	0	0	0	0	0	0	0	0	1	0	0	0	0	0	0	0	1
	ORTHOMCL6946	Deacetylases, including yeast histone deacetylase and acetoin utilization protein	0	0	0	0	0	0	0	0	1	0	1	0	0	0	0	0	0	0	0
	ORTHOMCL6952	hypothetical protein	0	0	0	0	0	0	1	1	0	0	0	0	1	0	0	0	0	0	0
	ORTHOMCL6969	dipeptide ABC transporter, ATP-binding protein	0	0	0	0	0	0	0	1	0	0	1	0	0	0	0	1	0	0	0
	ORTHOMCL6970	dipeptide ABC transporter, permease protein DppB, putative	0	0	0	0	0	0	0	1	0	0	1	0	0	0	0	1	0	0	0
	ORTHOMCL6971	mandelate racemase/muconate lactonizing enzyme family protein	0	0	0	0	0	0	0	1	0	0	1	0	0	0	0	1	0	0	0
	ORTHOMCL6972	Oligogalacturonate-specific porin protein (KdgM) superfamily	0	0	0	0	0	0	0	1	0	0	1	0	0	0	0	1	0	0	0
	ORTHOMCL6994	hypothetical protein	0	0	0	0	0	0	0	0	0	1	0	0	1	0	0	0	0	0	0
	ORTHOMCL7018	Outer membrane autotransporter barrel	0	0	0	0	0	0	0	0	0	0	0	0	1	1	0	0	0	0	0
	ORTHOMCL7019	hypothetical protein	0	0	0	0	0	0	0	0	0	0	0	0	1	1	0	0	0	0	0
	ORTHOMCL7032	hypothetical protein	0	0	0	0	1	1	0	1	0	0	0	0	0	0	0	0	0	0	0
	ORTHOMCL7034	xanthine permease	0	0	0	0	1	1	0	1	0	0	0	0	0	0	0	0	0	0	0
	ORTHOMCL7060	Glycosyltransferase	0	0	0	0	1	1	0	0	0	0	0	0	0	0	0	1	0	0	0
	ORTHOMCL7121	hypothetical protein	0	0	0	0	1	1	0	0	0	0	0	0	0	0	1	0	0	0	0
	ORTHOMCL7195	hypothetical protein	0	0	0	0	0	0	1	1	0	0	0	0	0	0	0	1	0	0	0
	ORTHOMCL7203	hypothetical protein	0	0	0	0	1	1	1	0	0	0	0	0	0	0	0	0	0	0	0
	ORTHOMCL7204	hypothetical protein	0	0	0	0	1	1	1	0	0	0	0	0	0	0	0	0	0	0	0
	ORTHOMCL7205	hypothetical protein	0	0	0	0	0	0	1	1	0	0	0	0	0	0	0	0	0	0	1
	ORTHOMCL7213	hypothetical protein	0	0	0	0	1	1	1	0	0	0	0	0	0	0	0	0	0	0	0
	ORTHOMCL7331	hypothetical protein	0	0	0	0	0	0	0	0	0	0	0	0	1	0	1	0	0	0	1
	ORTHOMCL7332	hypothetical protein	0	0	0	0	0	0	1	1	0	0	0	0	1	0	0	0	0	0	0
	ORTHOMCL7333	Protein of unknown function DUF264	0	0	0	0	0	0	1	1	0	0	0	0	1	0	0	0	0	0	0
	ORTHOMCL7337	sensor histidine kinase	0	0	0	0	0	0	1	0	0	0	0	0	1	0	1	0	0	0	0
	ORTHOMCL7360	calcium binding hemolysin protein, putative	0	0	0	0	0	0	0	0	0	1	1	0	0	0	0	0	0	0	0
	ORTHOMCL7363	L-arginine:lysine amidinotransferase, putative( EC:2.1.4.1 )	0	0	0	0	1	1	0	0	0	0	0	0	0	0	0	0	0	0	0
	ORTHOMCL7364	outer membrane porin, OprD family.	0	0	0	0	0	0	0	0	0	0	1	0	0	1	0	0	0	0	0
	ORTHOMCL7365	Transcriptional regulator	0	0	0	0	0	0	0	0	0	0	1	0	0	1	0	0	0	0	0
	ORTHOMCL7382	ABC-type nitrate/sulfonate/bicarbonate transport system, permease component	0	0	0	0	0	0	0	0	0	0	1	0	0	0	0	0	0	1	0
	ORTHOMCL7388	hypothetical protein	0	0	0	0	0	0	0	1	0	0	0	0	0	1	0	0	0	0	0
	ORTHOMCL7399	Predicted membrane protein	0	0	0	0	0	0	0	0	0	0	0	0	1	0	0	0	1	0	0
	ORTHOMCL7429	Arabinose efflux permease	0	0	0	0	0	0	0	0	0	0	1	0	0	1	0	0	0	0	0
	ORTHOMCL7459	hypothetical protein	0	0	0	0	0	0	0	0	0	0	0	1	0	0	0	1	0	0	1
	ORTHOMCL7462	hypothetical protein	0	0	0	0	0	0	1	1	0	0	0	1	0	0	0	0	0	0	0
	ORTHOMCL7463	hypothetical protein	0	0	0	0	0	0	1	1	0	0	0	1	0	0	0	0	0	0	0
	ORTHOMCL7466	hypothetical protein	0	0	0	0	0	0	1	0	0	0	0	1	0	1	0	0	0	0	0
	ORTHOMCL7482	hypothetical protein	0	0	0	0	0	0	0	1	0	0	0	1	0	0	0	1	0	0	0
	ORTHOMCL7490	type I restriction-modification enzyme, R subunit, putative( EC:3.1.21.3 )	0	0	0	0	0	0	0	0	0	0	0	1	0	0	1	1	0	0	0
	ORTHOMCL7493	Predicted integral membrane protein (DUF2282).	0	0	0	0	1	1	0	0	0	0	0	0	0	1	0	0	0	0	0
	ORTHOMCL7494	Uncharacterized protein conserved in bacteria (DUF2063).	0	0	0	0	1	1	0	0	0	0	0	0	0	1	0	0	0	0	0
	ORTHOMCL7495	hypothetical protein	0	0	0	0	1	1	0	1	0	0	0	0	0	0	0	0	0	0	0
	ORTHOMCL7507	hypothetical protein	0	0	0	0	0	0	0	0	0	0	0	1	0	0	0	1	0	1	0
	ORTHOMCL7512	hypothetical protein	0	0	0	0	0	0	0	0	0	0	0	1	0	0	1	0	1	0	0
	ORTHOMCL7547	Predicted hydrolases or acyltransferases (alpha/beta hydrolase superfamily)	0	0	0	0	0	0	0	0	0	0	0	0	0	0	1	0	1	1	0
	ORTHOMCL7579	Dehydrogenases with different specificities (related to short-chain alcohol dehydrogenases)( EC:1.1.1.100 )	0	0	0	0	1	1	0	0	0	0	0	0	0	0	0	0	0	0	1
	ORTHOMCL7583	hypothetical protein	0	0	0	0	0	0	1	1	0	0	0	0	0	0	0	0	0	1	0
	ORTHOMCL7586	RecT protein	0	0	0	0	0	0	1	1	0	0	0	0	0	0	0	0	0	0	1
	ORTHOMCL7605	hypothetical protein	0	0	0	0	1	1	0	0	1	0	0	0	0	0	0	0	0	0	0
	ORTHOMCL7606	Dehydrogenases with different specificities (related to short-chain alcohol dehydrogenases)	0	0	0	0	0	0	0	0	0	0	1	0	0	1	0	0	0	0	0
	ORTHOMCL7610	dipeptide ABC transporter, ATP-binding protein	0	0	0	0	0	0	0	1	0	0	1	0	0	0	0	1	0	0	0
	ORTHOMCL7630	3-oxoacyl-[acyl-carrier-protein] synthase III( EC:2.3.1.180 )	0	0	0	0	1	1	0	0	0	0	0	0	1	0	0	0	0	0	0
	ORTHOMCL7644	Response regulator containing CheY-like receiver, AAA-type ATPase, and DNA-binding domains	0	0	0	0	0	0	0	0	0	0	0	0	0	0	0	0	1	1	0
	ORTHOMCL7645	Signal transduction histidine kinase	0	0	0	0	0	0	0	0	0	0	0	0	0	0	0	0	1	1	0
	ORTHOMCL7646	Uncharacterized protein conserved in bacteria	0	0	0	0	0	0	0	0	0	0	0	0	0	0	0	0	1	1	0
	ORTHOMCL7647	Esterase/lipase( EC:3.1.1.1 )	0	0	0	0	0	0	0	0	0	0	0	0	0	0	0	0	1	1	0
	ORTHOMCL7648	4-aminobutyrate aminotransferase and related aminotransferases	0	0	0	0	0	0	0	0	0	0	0	0	0	0	0	0	1	1	0
	ORTHOMCL7649	Haloacid Dehalogenase superfamily, subfamily IB, phosphoserine phosphatase-like/2,3-diketo-5-methylthio-1-phosphopentane phosphatase	0	0	0	0	0	0	0	0	0	0	0	0	0	0	0	0	1	1	0
	ORTHOMCL7650	Outer membrane protein V	0	0	0	0	0	0	0	0	0	0	0	0	0	0	0	0	1	1	0
	ORTHOMCL7651	EamA-like transporter family.	0	0	0	0	0	0	0	0	0	0	0	0	0	0	0	0	1	1	0
	ORTHOMCL7652	EamA-like transporter family.	0	0	0	0	0	0	0	0	0	0	0	0	0	0	0	0	1	1	0
	ORTHOMCL7653	hypothetical protein	0	0	0	0	0	0	0	0	0	0	0	0	0	0	0	0	1	1	0
	ORTHOMCL7662	hypothetical protein	0	0	0	0	0	0	0	0	0	0	0	1	0	0	0	1	0	0	1
	ORTHOMCL7668	hypothetical protein	0	0	0	0	0	0	0	0	0	0	0	1	0	0	0	1	0	1	0
	ORTHOMCL7669	hypothetical protein	0	0	0	0	0	0	0	0	0	0	0	1	0	0	0	1	0	1	0
	ORTHOMCL7731	hypothetical protein	0	0	0	0	1	1	0	1	0	0	0	0	0	0	0	0	0	0	0
	ORTHOMCL7732	Protein of unknown function (DUF2388).	0	0	0	0	1	1	0	1	0	0	0	0	0	0	0	0	0	0	0
	ORTHOMCL7733	Predicted transcription regulator containing HTH domain	0	0	0	0	1	1	0	1	0	0	0	0	0	0	0	0	0	0	0
	ORTHOMCL7734	Predicted signal transduction protein containing sensor and EAL domains	0	0	0	0	1	1	0	1	0	0	0	0	0	0	0	0	0	0	0
	ORTHOMCL7741	hypothetical protein	0	0	0	0	1	1	0	1	0	0	0	0	0	0	0	0	0	0	0
	ORTHOMCL7742	hypothetical protein	0	0	0	0	1	1	0	1	0	0	0	0	0	0	0	0	0	0	0
	ORTHOMCL7748	hypothetical protein	0	0	0	0	1	1	0	1	0	0	0	0	0	0	0	0	0	0	0
	ORTHOMCL7749	Protein of unknown function (DUF1266).	0	0	0	0	1	1	0	1	0	0	0	0	0	0	0	0	0	0	0
	ORTHOMCL7750	hypothetical protein	0	0	0	0	1	1	0	1	0	0	0	0	0	0	0	0	0	0	0
	ORTHOMCL7751	hypothetical protein	0	0	0	0	1	1	0	1	0	0	0	0	0	0	0	0	0	0	0
	ORTHOMCL7754	hypothetical protein	0	0	0	0	1	1	0	0	0	0	0	0	0	0	0	0	0	0	1
	ORTHOMCL7755	Predicted exporters of the RND superfamily	0	0	0	0	1	1	0	0	0	0	0	0	0	0	0	0	0	0	1
	ORTHOMCL7756	hypothetical protein	0	0	0	0	1	1	0	0	0	0	0	0	0	0	0	0	0	0	1
	ORTHOMCL7760	General substrate transporter:Major facilitator superfamily	0	0	0	0	1	1	0	0	0	0	1	0	0	0	0	0	0	0	0
	ORTHOMCL7773	hypothetical protein	0	0	0	0	1	1	0	0	0	0	1	0	0	0	0	0	0	0	0
	ORTHOMCL7777	Predicted metal-dependent hydrolase	0	0	0	0	1	1	0	0	0	0	1	0	0	0	0	0	0	0	0
	ORTHOMCL7803	Predicted membrane protein	0	0	0	0	0	0	0	0	0	0	1	0	0	0	0	0	1	1	0
	ORTHOMCL7805	Xanthine and CO dehydrogenases maturation factor, XdhC/CoxF family	0	0	0	0	0	0	0	0	0	1	1	0	0	0	0	0	1	0	0
	ORTHOMCL7813	Nitroreductase	0	0	0	0	0	0	0	0	0	1	1	0	0	0	0	0	0	0	1
	ORTHOMCL7820	Predicted transcriptional regulator	0	0	0	0	0	0	0	1	0	1	0	0	0	0	0	0	0	1	0
	ORTHOMCL7823	Zinc-containing alcohol dehydrogenase superfamily( EC:1.1.1.1,EC:1.1.1.284 )	0	0	0	0	1	1	0	0	0	0	0	0	0	0	0	1	0	0	0
	ORTHOMCL7828	hypothetical protein	0	0	0	0	1	1	0	0	0	0	0	0	0	0	0	1	0	0	0
	ORTHOMCL7882	Predicted lipoprotein involved in nitrous oxide reduction	0	0	0	0	0	0	0	0	0	0	0	0	0	0	1	0	1	1	0
	ORTHOMCL7883	ABC-type transport system involved in multi-copper enzyme maturation, permease component	0	0	0	0	0	0	0	0	0	0	0	0	0	0	1	0	1	1	0
	ORTHOMCL7884	ABC-type multidrug transport system, ATPase component	0	0	0	0	0	0	0	0	0	0	0	0	0	0	1	0	1	1	0
	ORTHOMCL7885	parallel beta-helix repeat (two copies)	0	0	0	0	0	0	0	0	0	0	0	0	0	0	1	0	1	1	0
	ORTHOMCL7886	Nitrous oxide reductase( EC:1.7.2.4 )	0	0	0	0	0	0	0	0	0	0	0	0	0	0	1	0	1	1	0
	ORTHOMCL7887	Regulator of nitric oxide reductase transcription	0	0	0	0	0	0	0	0	0	0	0	0	0	0	1	0	1	1	0
	ORTHOMCL7909	Glycosyl transferase, group 1	0	0	0	0	1	1	0	0	0	0	0	0	0	0	1	0	0	0	0
	ORTHOMCL7912	hypothetical protein	0	0	0	0	1	1	0	0	0	0	0	0	0	0	1	0	0	0	0
	ORTHOMCL7913	Protein of unknown function (DUF2628).	0	0	0	0	0	0	0	0	0	0	0	0	0	0	1	0	1	1	0
	ORTHOMCL7915	Uncharacterized protein conserved in bacteria( EC:2.1.1.72,EC:3.6.4.13 )	0	0	0	0	1	1	0	0	0	0	0	0	0	0	1	0	0	0	0
	ORTHOMCL7926	hypothetical protein	0	0	0	0	1	1	0	0	0	0	0	0	0	0	1	0	0	0	0
	ORTHOMCL7931	Major Facilitator Superfamily.	0	0	0	0	1	1	0	0	1	0	0	0	0	0	0	0	0	0	0
	ORTHOMCL7932	Uncharacterized conserved protein	0	0	0	0	1	1	0	0	1	0	0	0	0	0	0	0	0	0	0
	ORTHOMCL7961	hypothetical protein	0	0	0	0	0	0	0	1	1	0	0	0	0	0	1	0	0	0	0
	ORTHOMCL7995	Transcriptional regulators	0	0	0	0	1	1	0	0	1	0	0	0	0	0	0	0	0	0	0
	ORTHOMCL7996	hypothetical protein	0	0	0	0	0	0	0	0	1	0	0	0	0	0	0	1	0	0	1
	ORTHOMCL8002	hypothetical protein	0	0	0	0	1	1	1	0	0	0	0	0	0	0	0	0	0	0	0
	ORTHOMCL8013	hypothetical protein	0	0	0	0	1	1	1	0	0	0	0	0	0	0	0	0	0	0	0
	ORTHOMCL8127	hypothetical protein	0	0	0	0	0	0	0	0	0	0	0	0	0	1	0	0	1	1	0
	ORTHOMCL8151	hypothetical protein	0	0	0	0	0	0	1	0	0	0	0	0	1	0	0	0	0	0	1
	ORTHOMCL8161	2-polyprenylphenol hydroxylase and related flavodoxin oxidoreductases( EC:1.17.1.1 )	0	0	0	0	0	0	0	0	0	0	1	0	1	0	0	0	0	0	1
	ORTHOMCL8171	ABC-type polysaccharide/polyol phosphate export systems, permease component	0	0	0	0	0	0	0	0	0	0	1	0	1	0	1	0	0	0	0
	ORTHOMCL8173	hypothetical protein	0	0	0	0	0	0	0	1	0	0	1	0	1	0	0	0	0	0	0
	ORTHOMCL8176	Protein of unknown function (DUF2514).	0	0	0	0	0	0	0	0	0	0	0	0	1	0	0	0	1	1	0
	ORTHOMCL8187	Transcriptional regulators containing a DNA-binding HTH domain and an aminotransferase domain (MocR family) and their eukaryotic orthologs	0	0	0	0	0	0	0	0	0	0	0	0	1	0	0	1	0	0	1
	ORTHOMCL8188	hypothetical protein	0	0	0	0	0	0	0	0	0	0	0	0	1	0	0	1	0	0	1
	ORTHOMCL8190	hypothetical protein	0	0	0	0	0	0	0	0	0	0	0	0	0	0	0	0	1	1	0
	ORTHOMCL8193	hypothetical protein	0	0	0	0	0	0	1	0	0	0	0	0	1	0	0	0	0	0	0
	ORTHOMCL8194	hypothetical protein	0	0	0	0	0	0	0	1	0	0	0	0	0	0	0	0	0	1	0
	ORTHOMCL8199	hypothetical protein	0	0	0	0	0	0	0	1	0	0	0	0	0	0	0	0	1	0	0
	ORTHOMCL8200	Ornithine/acetylornithine aminotransferase	0	0	0	0	1	1	0	0	0	0	0	0	0	0	0	0	0	0	0
	ORTHOMCL8204	AMP-dependent synthetase and ligase	0	0	0	0	0	0	0	0	1	0	1	0	0	0	0	0	0	0	0
	ORTHOMCL8205	hypothetical protein	0	0	0	0	0	0	1	0	0	0	0	0	0	1	0	0	0	0	0
	ORTHOMCL8207	hypothetical protein	0	0	0	0	0	0	0	0	0	0	0	0	1	0	0	0	0	0	1
	ORTHOMCL8209	ABC-type nitrate/sulfonate/bicarbonate transport system, ATPase component	0	0	0	0	0	0	0	0	0	0	1	0	0	0	0	0	0	1	0
	ORTHOMCL8214	Sortase and related acyltransferases( EC:2.3.1.82 )	0	0	0	0	0	0	0	0	0	0	0	0	0	0	0	0	1	1	0
	ORTHOMCL8216	Universal stress protein UspA and related nucleotide-binding proteins	0	0	0	0	0	0	0	0	1	0	0	0	0	0	0	0	1	0	0
	ORTHOMCL8224	Nucleoside-diphosphate-sugar epimerases( EC:5.1.3.2 )	0	0	0	0	0	0	0	0	0	0	0	0	0	0	1	0	1	0	0
	ORTHOMCL8242	DNA-binding HTH domain-containing proteins	0	0	0	0	0	0	1	0	0	0	0	0	1	0	0	0	0	0	0
	ORTHOMCL8243	Transcriptional regulator	0	0	0	0	0	0	1	0	0	0	0	0	0	0	0	0	1	0	0
	ORTHOMCL8249	hypothetical protein	0	0	0	0	0	0	0	1	0	0	0	0	0	0	0	0	0	1	0
	ORTHOMCL8256	Uncharacterized protein conserved in bacteria	0	0	0	0	1	1	0	0	0	0	0	0	0	0	0	0	0	0	0
	ORTHOMCL8257	Amine oxidase( EC:1.13.12.3 )	0	0	0	0	1	1	0	0	0	0	0	0	0	0	0	0	0	0	0
	ORTHOMCL8258	Amidase	0	0	0	0	1	1	0	0	0	0	0	0	0	0	0	0	0	0	0
	ORTHOMCL8259	aromatic amino acid transport protein	0	0	0	0	1	1	0	0	0	0	0	0	0	0	0	0	0	0	0
	ORTHOMCL8260	Pyoverdine/dityrosine biosynthesis protein	0	0	0	0	0	0	0	0	0	0	0	1	0	0	0	1	0	0	1
	ORTHOMCL8272	AraC-type DNA-binding domain-containing proteins	0	0	0	0	0	0	0	0	0	0	0	1	0	0	0	0	0	0	1
	ORTHOMCL8276	hypothetical protein	0	0	0	0	0	0	0	0	0	0	0	1	1	0	0	1	0	0	0
	ORTHOMCL8277	hypothetical protein	0	0	0	0	0	0	0	0	0	0	0	1	1	0	0	1	0	0	0
	ORTHOMCL8278	hypothetical protein	0	0	0	0	0	0	0	0	0	0	0	1	1	0	0	1	0	0	0
	ORTHOMCL8279	hypothetical protein	0	0	0	0	0	0	0	0	0	0	0	1	1	0	0	1	0	0	0
	ORTHOMCL8280	hypothetical protein	0	0	0	0	0	0	0	0	0	0	0	1	1	0	0	1	0	0	0
	ORTHOMCL8281	Uncharacterized proteins of the AP superfamily	0	0	0	0	0	0	0	0	0	0	0	1	1	0	0	1	0	0	0
	ORTHOMCL8282	Xylose isomerase-like TIM barrel.	0	0	0	0	0	0	0	0	0	0	0	1	1	0	0	1	0	0	0
	ORTHOMCL8283	Predicted metal-dependent hydrolases with the TIM-barrel fold	0	0	0	0	0	0	0	0	0	0	0	1	1	0	0	1	0	0	0
	ORTHOMCL8284	hypothetical protein	0	0	0	0	0	0	0	0	0	0	0	1	1	0	0	1	0	0	0
	ORTHOMCL8285	4-hydroxybenzoate polyprenyltransferase and related prenyltransferases( EC:2.5.1.- )	0	0	0	0	0	0	0	0	0	0	0	1	1	0	0	1	0	0	0
	ORTHOMCL8286	3-dehydroquinate synthetase( EC:4.2.3.4 )	0	0	0	0	0	0	0	0	0	0	0	1	1	0	0	1	0	0	0
	ORTHOMCL8287	putative cytoplasmic protein	0	0	0	0	0	0	1	0	0	0	0	1	0	0	0	0	0	1	0
	ORTHOMCL8288	haloacid dehalogenase superfamily, subfamily IA, variant 3 with third motif having DD or ED( EC:3.8.1.2 )	0	0	0	0	0	0	0	0	0	0	0	1	0	0	0	1	0	0	0
	ORTHOMCL8297	hypothetical protein	0	0	0	0	0	0	0	1	0	0	0	1	0	0	0	1	0	0	0
	ORTHOMCL8299	Methylase involved in ubiquinone/menaquinone biosynthesis	0	0	0	0	0	0	0	0	0	0	0	1	0	0	0	1	0	0	1
	ORTHOMCL8300	Transcriptional regulator	0	0	0	0	0	0	0	0	0	0	0	1	0	0	0	1	0	0	1
	ORTHOMCL8310	hypothetical protein	0	0	0	0	0	0	0	1	0	0	0	1	0	1	0	0	0	0	0
	ORTHOMCL8313	hypothetical protein	0	0	0	0	0	0	0	0	0	0	0	1	1	0	0	0	0	0	1
	ORTHOMCL8314	hypothetical protein	0	0	0	0	0	0	1	0	0	0	0	1	1	0	0	0	0	0	0
	ORTHOMCL8319	Predicted pyridoxal phosphate-dependent enzyme apparently involved in regulation of cell wall biogenesis	0	0	0	0	0	0	0	0	0	0	0	1	0	0	0	0	1	0	0
	ORTHOMCL8330	Predicted oxidoreductases (related to aryl-alcohol dehydrogenases)	0	0	0	0	0	0	0	0	0	0	0	1	1	0	0	1	0	0	0
	ORTHOMCL8339	homospermidine synthase( EC:2.5.1.44 )	0	0	0	0	0	0	0	0	0	0	0	1	0	0	0	1	0	0	1
	ORTHOMCL8348	Helix-turn-helix.	0	0	0	0	0	0	0	0	0	0	0	1	0	1	0	1	0	0	0
	ORTHOMCL8361	hypothetical protein	0	0	0	0	1	1	0	0	0	0	0	0	0	0	0	1	0	0	0
	ORTHOMCL8368	Protein of unknown function (DUF3380).	0	0	0	0	0	0	0	0	0	0	1	0	0	0	1	0	0	0	0
	ORTHOMCL8371	Demethylmenaquinone methyltransferase	0	0	0	0	0	0	0	0	0	0	1	1	0	0	1	0	0	0	0
	ORTHOMCL8377	AraC-type DNA-binding domain-containing proteins	0	0	0	0	0	0	0	0	0	0	0	1	0	0	0	1	0	0	1
	ORTHOMCL8399	Transcriptional regulator containing an amidase domain and an AraC-type DNA-binding HTH domain	0	0	0	0	0	0	0	0	0	0	0	0	0	0	1	1	0	0	0
	ORTHOMCL8420	Putative GTPases (G3E family)	0	0	0	0	0	0	0	0	1	0	0	0	0	0	1	0	0	0	1
	ORTHOMCL8442	5-carboxymethyl-2-hydroxymuconate isomerase( EC:5.3.3.10 )	0	0	0	0	0	0	0	1	0	0	1	0	0	0	0	1	0	0	0
	ORTHOMCL8443	NAD dependent epimerase/dehydratase family.	0	0	0	0	0	0	0	1	0	0	1	0	0	0	0	1	0	0	0
	ORTHOMCL8455	Transcriptional regulators	0	0	0	0	0	0	0	0	1	1	0	0	0	1	0	0	0	0	0
	ORTHOMCL8463	hypothetical protein	0	0	0	0	0	0	0	0	0	0	0	1	0	1	0	0	0	0	1
	ORTHOMCL8481	hypothetical protein	0	0	0	0	0	0	0	0	0	0	1	0	0	1	1	0	0	0	0
	ORTHOMCL8482	hypothetical protein	0	0	0	0	0	0	0	0	0	0	0	1	0	0	0	1	0	0	1
	ORTHOMCL8821	hypothetical protein	0	0	0	0	1	1	0	1	0	0	0	0	0	0	0	0	0	0	0
	ORTHOMCL8822	Uncharacterized protein conserved in bacteria (DUF2136).	0	0	0	0	1	1	0	1	0	0	0	0	0	0	0	0	0	0	0
	ORTHOMCL8824	hypothetical protein	0	0	0	0	1	1	0	1	0	0	0	0	0	0	0	0	0	0	0
	ORTHOMCL8829	hypothetical protein	0	0	0	0	1	1	0	1	0	0	0	0	0	0	0	0	0	0	0
	ORTHOMCL8831	hypothetical protein	0	0	0	0	1	1	0	1	0	0	0	0	0	0	0	0	0	0	0
	ORTHOMCL8832	hypothetical protein	0	0	0	0	1	1	0	1	0	0	0	0	0	0	0	0	0	0	0
	ORTHOMCL8833	hypothetical protein	0	0	0	0	1	1	0	1	0	0	0	0	0	0	0	0	0	0	0
	ORTHOMCL8834	hypothetical protein	0	0	0	0	1	1	0	1	0	0	0	0	0	0	0	0	0	0	0
	ORTHOMCL8835	hypothetical protein	0	0	0	0	1	1	0	1	0	0	0	0	0	0	0	0	0	0	0
	ORTHOMCL8836	ABC-type metal ion transport system, periplasmic component/surface antigen	0	0	0	0	1	1	0	1	0	0	0	0	0	0	0	0	0	0	0
	ORTHOMCL8837	Acetyltransferases, including N-acetylases of ribosomal proteins	0	0	0	0	1	1	0	1	0	0	0	0	0	0	0	0	0	0	0
	ORTHOMCL8838	Protein of unknown function (DUF1090).	0	0	0	0	1	1	0	1	0	0	0	0	0	0	0	0	0	0	0
	ORTHOMCL8839	hypothetical protein	0	0	0	0	1	1	0	1	0	0	0	0	0	0	0	0	0	0	0
	ORTHOMCL8840	DNA-binding winged-HTH domains	0	0	0	0	1	1	0	1	0	0	0	0	0	0	0	0	0	0	0
	ORTHOMCL8849	Predicted acyltransferases	0	0	0	0	1	1	0	0	0	0	0	0	0	0	0	0	0	0	1
	ORTHOMCL8850	Predicted transcriptional regulator	0	0	0	0	1	1	0	0	0	0	0	0	0	0	0	0	0	0	1
	ORTHOMCL8853	hypothetical protein	0	0	0	0	1	1	0	0	0	0	1	0	0	0	0	0	0	0	0
	ORTHOMCL8854	hypothetical protein	0	0	0	0	1	1	0	0	0	0	1	0	0	0	0	0	0	0	0
	ORTHOMCL8860	Glycerol dehydrogenase and related enzymes( EC:1.1.1.6 )	0	0	0	0	1	1	0	0	0	0	1	0	0	0	0	0	0	0	0
	ORTHOMCL8862	hypothetical protein	0	0	0	0	1	1	0	0	0	0	1	0	0	0	0	0	0	0	0
	ORTHOMCL8875	hypothetical protein	0	0	0	0	1	1	0	0	0	0	1	0	0	0	0	0	0	0	0
	ORTHOMCL8876	hypothetical protein	0	0	0	0	1	1	0	0	0	0	1	0	0	0	0	0	0	0	0
	ORTHOMCL8901	hypothetical protein	0	0	0	0	0	0	0	0	0	0	1	0	0	0	0	0	1	1	0
	ORTHOMCL8902	AraC-type DNA-binding domain-containing proteins	0	0	0	0	0	0	0	0	0	0	1	0	0	0	0	0	1	1	0
	ORTHOMCL8904	Sugar (pentulose and hexulose) kinases	0	0	0	0	0	0	0	0	0	0	1	0	0	0	0	0	1	1	0
	ORTHOMCL8905	Methyl-accepting chemotaxis protein	0	0	0	0	0	0	0	0	0	0	1	0	0	0	0	0	1	1	0
	ORTHOMCL8908	Short-chain dehydrogenases of various substrate specificities	0	0	0	0	0	0	0	1	0	0	0	0	0	0	0	0	1	0	1
	ORTHOMCL8911	hypothetical protein	0	0	0	0	0	0	0	1	0	0	0	0	0	0	0	0	1	0	1
	ORTHOMCL8913	Predicted membrane protein	0	0	0	0	0	0	0	0	0	0	1	0	0	0	0	0	1	1	0
	ORTHOMCL8914	Cytochrome B561	0	0	0	0	0	0	0	0	0	0	1	0	0	0	0	0	1	1	0
	ORTHOMCL8915	Transcriptional regulator	0	0	0	0	0	0	0	0	0	0	1	0	0	0	0	0	1	1	0
	ORTHOMCL8916	Dioxygenases related to 2-nitropropane dioxygenase( EC:1.13.12.16 )	0	0	0	0	0	0	0	0	0	0	1	0	0	0	0	0	1	1	0
	ORTHOMCL8928	hypothetical protein	0	0	0	0	1	0	0	0	0	0	0	0	0	0	0	0	1	1	0
	ORTHOMCL8933	Uncharacterized conserved protein	0	0	0	0	0	0	0	0	0	0	1	0	0	0	0	0	1	1	0
	ORTHOMCL8935	Dihydroxyacid dehydratase/phosphogluconate dehydratase( EC:4.2.1.9 )	0	0	0	0	0	0	0	0	0	0	1	0	0	0	0	0	1	1	0
	ORTHOMCL8940	hypothetical protein	0	0	0	0	0	0	0	0	0	1	0	0	0	0	0	0	1	1	0
	ORTHOMCL8942	RHS repeat-associated core domain	0	0	0	0	0	0	0	0	0	1	1	0	0	0	0	0	1	0	0
	ORTHOMCL8946	gamma-aminobutyrate permease	0	0	0	0	0	0	0	0	0	1	1	0	0	0	0	0	1	0	0
	ORTHOMCL8947	Transcriptional regulator containing an amidase domain and an AraC-type DNA-binding HTH domain	0	0	0	0	0	0	0	0	0	1	1	0	0	0	0	0	1	0	0
	ORTHOMCL8949	RHS repeat-associated core domain	0	0	0	0	0	0	0	0	0	1	1	0	0	0	0	0	1	0	0
	ORTHOMCL8953	hypothetical protein	0	0	0	0	0	0	0	0	0	1	0	0	0	0	0	0	1	1	0
	ORTHOMCL8957	hypothetical protein	0	0	0	0	0	0	0	0	0	1	1	0	0	0	0	0	0	1	0
	ORTHOMCL8960	hypothetical protein	0	0	0	0	0	0	0	1	0	0	0	0	0	0	0	1	0	0	1
	ORTHOMCL8963	Predicted transcriptional regulators	0	0	0	0	1	1	0	0	0	0	0	0	0	0	0	1	0	0	0
	ORTHOMCL8964	hypothetical protein	0	0	0	0	1	1	0	0	0	0	0	0	0	0	0	1	0	0	0
	ORTHOMCL8966	hypothetical protein	0	0	0	0	0	0	0	0	0	1	0	0	0	0	0	1	0	0	1
	ORTHOMCL8968	hypothetical protein	0	0	0	0	0	0	0	0	0	1	0	0	0	0	0	1	0	0	1
	ORTHOMCL8976	hypothetical protein	0	0	0	0	1	1	0	0	0	0	0	0	0	0	0	1	0	0	0
	ORTHOMCL8978	hypothetical protein	0	0	0	0	1	1	0	0	0	0	0	0	0	0	0	1	0	0	0
	ORTHOMCL9067	hypothetical protein	0	0	0	0	0	0	0	0	0	0	0	0	0	0	1	0	1	1	0
	ORTHOMCL9068	hypothetical protein	0	0	0	0	0	0	0	0	0	0	0	0	0	0	1	0	1	1	0
	ORTHOMCL9071	Aerobic-type carbon monoxide dehydrogenase, middle subunit CoxM/CutM homologs( EC:1.2.99.2 )	0	0	0	0	0	0	0	0	0	1	1	0	0	0	1	0	0	0	0
	ORTHOMCL9072	Aerobic-type carbon monoxide dehydrogenase, large subunit CoxL/CutL homologs( EC:1.2.99.2 )	0	0	0	0	0	0	0	0	0	1	1	0	0	0	1	0	0	0	0
	ORTHOMCL9074	Glutathione S-transferase( EC:2.5.1.18 )	0	0	0	0	0	0	0	0	0	0	0	0	0	0	1	1	0	0	1
	ORTHOMCL9076	Predicted acyltransferases	0	0	0	0	0	0	0	0	0	0	1	0	0	0	1	1	0	0	0
	ORTHOMCL9081	hypothetical protein( EC:1.3.3.4 )	0	0	0	0	0	0	0	0	0	0	0	0	0	0	1	1	1	0	0
	ORTHOMCL9082	hypothetical protein	0	0	0	0	1	1	0	0	0	0	0	0	0	0	1	0	0	0	0
	ORTHOMCL9083	hypothetical protein	0	0	0	0	1	1	0	0	0	0	0	0	0	0	1	0	0	0	0
	ORTHOMCL9084	hypothetical protein	0	0	0	0	0	0	0	1	0	0	0	0	0	0	1	0	0	1	0
	ORTHOMCL9085	hypothetical protein	0	0	0	0	0	0	0	1	0	0	0	0	0	0	1	0	0	1	0
	ORTHOMCL9088	hypothetical protein	0	0	0	0	0	0	0	1	0	0	0	0	0	0	1	0	0	1	0
	ORTHOMCL9091	hypothetical protein	0	0	0	0	0	0	0	0	0	0	0	0	0	0	1	0	1	1	0
	ORTHOMCL9092	hypothetical protein	0	0	0	0	1	1	0	0	0	0	0	0	0	0	1	0	0	0	0
	ORTHOMCL9093	Transcriptional regulator	0	0	0	0	0	0	0	0	0	0	0	0	0	0	1	0	1	1	0
	ORTHOMCL9094	Protein of unknown function (DUF2790).	0	0	0	0	0	0	0	0	0	0	0	0	0	0	1	0	1	1	0
	ORTHOMCL9095	hypothetical protein	0	0	0	0	0	0	0	0	0	0	1	0	0	0	1	0	1	0	0
	ORTHOMCL9096	hypothetical protein	0	0	0	0	0	0	0	0	0	0	0	0	0	0	1	0	1	1	0
	ORTHOMCL9099	Predicted Zn peptidase	0	0	0	0	1	1	0	0	0	0	0	0	0	0	1	0	0	0	0
	ORTHOMCL9100	Predicted nucleic acid-binding protein, contains PIN domain	0	0	0	0	1	1	0	0	0	0	0	0	0	0	1	0	0	0	0
	ORTHOMCL9103	Sulfotransferase family.	0	0	0	0	1	1	0	0	0	0	0	0	0	0	1	0	0	0	0
	ORTHOMCL9106	AraC-type DNA-binding domain-containing proteins	0	0	0	0	0	0	0	0	0	0	1	0	0	0	1	0	0	0	1
	ORTHOMCL9107	Protein involved in meta-pathway of phenol degradation	0	0	0	0	0	0	0	0	0	0	1	0	0	0	1	0	0	0	1
	ORTHOMCL9108	diguanylate cyclase (GGDEF) domain	0	0	0	0	0	0	0	0	0	0	0	0	0	0	1	1	0	0	1
	ORTHOMCL9109	ABC-type sugar transport system, periplasmic component	0	0	0	0	0	0	0	0	0	0	0	0	0	0	1	1	0	0	1
	ORTHOMCL9115	Arylsulfatase A and related enzymes( EC:3.1.6.1 )	0	0	0	0	1	1	0	0	1	0	0	0	0	0	0	0	0	0	0
	ORTHOMCL9116	NADH:flavin oxidoreductases, Old Yellow Enzyme family( EC:1.3.1.34 )	0	0	0	0	0	0	0	0	1	0	1	0	0	0	0	1	0	0	0
	ORTHOMCL9117	Lactoylglutathione lyase and related lyases	0	0	0	0	0	0	0	0	1	0	1	0	0	0	0	1	0	0	0
	ORTHOMCL9118	Arabinose efflux permease	0	0	0	0	0	0	0	0	1	1	1	0	0	0	0	0	0	0	0
	ORTHOMCL9119	Predicted nucleic-acid-binding protein containing a Zn-ribbon	0	0	0	0	0	0	0	0	1	1	1	0	0	0	0	0	0	0	0
	ORTHOMCL9120	Predicted acyl-CoA transferases/carnitine dehydratase	0	0	0	0	0	0	0	0	1	1	1	0	0	0	0	0	0	0	0
	ORTHOMCL9129	Predicted membrane-associated, metal-dependent hydrolase	0	0	0	0	0	0	0	0	1	0	1	0	0	0	1	0	0	0	0
	ORTHOMCL9133	SMI1 / KNR4 family.	0	0	0	0	0	0	0	0	1	1	0	0	0	0	0	1	0	0	0
	ORTHOMCL9149	Arabinose efflux permease	0	0	0	0	0	0	0	0	1	0	1	0	0	0	0	0	1	0	0
	ORTHOMCL9168	hypothetical protein	0	0	0	0	0	0	0	0	1	1	1	0	0	0	0	0	0	0	0
	ORTHOMCL9174	amidohydrolase( EC:3.5.1.32 )	0	0	0	0	1	1	0	0	1	0	0	0	0	0	0	0	0	0	0
	ORTHOMCL9179	hypothetical protein	0	0	0	0	0	0	1	0	0	0	0	0	0	0	0	0	1	1	0
	ORTHOMCL9185	hypothetical protein	0	0	0	0	1	1	1	0	0	0	0	0	0	0	0	0	0	0	0
	ORTHOMCL9191	hypothetical protein	0	0	0	0	0	0	1	1	0	0	0	0	0	0	0	0	0	1	0
	ORTHOMCL9194	Transcriptional regulator	0	0	0	0	0	0	1	0	0	0	1	0	0	0	0	0	0	0	1
	ORTHOMCL9195	Stress responsive A/B Barrel Domain.	0	0	0	0	0	0	1	0	0	0	1	0	0	0	0	0	0	0	1
	ORTHOMCL9196	Peroxiredoxin	0	0	0	0	0	0	1	0	0	0	1	0	0	0	1	0	0	0	0
	ORTHOMCL9197	Protein-disulfide isomerase	0	0	0	0	0	0	1	0	0	0	1	0	0	0	1	0	0	0	0
	ORTHOMCL9198	Predicted membrane protein	0	0	0	0	0	0	1	0	0	0	1	0	0	0	1	0	0	0	0
	ORTHOMCL9199	Anthranilate/para-aminobenzoate synthases component I( EC:2.6.1.85 )	0	0	0	0	0	0	1	0	1	0	0	0	0	0	0	1	0	0	0
	ORTHOMCL9200	hypothetical protein	0	0	0	0	1	1	1	0	0	0	0	0	0	0	0	0	0	0	0
	ORTHOMCL9201	hypothetical protein	0	0	0	0	1	1	1	0	0	0	0	0	0	0	0	0	0	0	0
	ORTHOMCL9202	hypothetical protein	0	0	0	0	1	1	1	0	0	0	0	0	0	0	0	0	0	0	0
	ORTHOMCL9203	Hemolysin-type calcium-binding repeat (2 copies).	0	0	0	0	0	0	1	0	0	0	0	0	0	0	1	1	0	0	0
	ORTHOMCL9204	hypothetical protein	0	0	0	0	0	0	1	1	0	0	0	0	0	0	0	0	0	0	1
	ORTHOMCL9205	Uncharacterized protein conserved in bacteria	0	0	0	0	1	1	1	0	0	0	0	0	0	0	0	0	0	0	0
	ORTHOMCL9208	Flp/Fap pilin component.	0	0	0	0	1	1	1	0	0	0	0	0	0	0	0	0	0	0	0
	ORTHOMCL9209	hypothetical protein	0	0	0	0	1	1	1	0	0	0	0	0	0	0	0	0	0	0	0
	ORTHOMCL9211	Superfamily I DNA and RNA helicases	0	0	0	0	1	1	1	0	0	0	0	0	0	0	0	0	0	0	0
	ORTHOMCL9214	hypothetical protein	0	0	0	0	1	1	1	0	0	0	0	0	0	0	0	0	0	0	0
	ORTHOMCL9215	Predicted nucleotidyltransferases	0	0	0	0	0	0	1	1	0	0	0	0	0	0	0	0	1	0	0
	ORTHOMCL9219	Transcriptional regulator	0	0	0	0	0	0	1	0	0	0	1	0	0	0	0	0	0	1	0
	ORTHOMCL9255	Plasmid stabilization system protein	0	0	0	0	0	0	0	0	1	0	0	0	0	1	0	1	0	0	0
	ORTHOMCL9260	hypothetical protein	0	0	0	0	0	0	0	0	1	1	0	0	0	1	0	0	0	0	0
	ORTHOMCL9267	hypothetical protein	0	0	0	0	0	0	0	0	0	1	1	0	0	1	0	0	0	0	0
	ORTHOMCL9268	citrate transporter, CitMHS family	0	0	0	0	0	0	0	0	1	1	0	0	0	1	0	0	0	0	0
	ORTHOMCL9269	Asp/Glu/Hydantoin racemase.	0	0	0	0	0	0	0	0	1	1	0	0	0	1	0	0	0	0	0
	ORTHOMCL9270	Transcriptional regulators	0	0	0	0	0	0	0	0	1	1	0	0	0	1	0	0	0	0	0
	ORTHOMCL9271	RraA famliy	0	0	0	0	0	0	0	0	1	1	0	0	0	1	0	0	0	0	0
	ORTHOMCL9272	Isocitrate/isopropylmalate dehydrogenase( EC:1.1.1.85 )	0	0	0	0	0	0	0	0	1	1	0	0	0	1	0	0	0	0	0
	ORTHOMCL9278	hypothetical protein	0	0	0	0	0	0	0	0	1	0	0	0	0	1	0	0	0	0	1
	ORTHOMCL9281	hypothetical protein	0	0	0	0	0	0	1	0	0	0	0	0	0	1	0	1	0	0	0
	ORTHOMCL9286	hypothetical protein	0	0	0	0	0	0	1	0	0	0	0	0	0	1	1	0	0	0	0
	ORTHOMCL9289	3-carboxymuconate cyclase	0	0	0	0	0	0	0	0	1	1	0	0	0	1	0	0	0	0	0
	ORTHOMCL9290	membrane protein AbrB duplication	0	0	0	0	0	0	0	0	1	1	0	0	0	1	0	0	0	0	0
	ORTHOMCL9291	Methyl-accepting chemotaxis protein	0	0	0	0	0	0	0	0	1	1	0	0	0	1	0	0	0	0	0
	ORTHOMCL9292	pyruvate kinase( EC:2.7.1.40 )	0	0	0	0	0	0	0	0	1	1	0	0	0	1	0	0	0	0	0
	ORTHOMCL9293	phosphopyruvate hydratase( EC:4.2.1.11 )	0	0	0	0	0	0	0	0	1	1	0	0	0	1	0	0	0	0	0
	ORTHOMCL9294	triosephosphate isomerase( EC:5.3.1.1 )	0	0	0	0	0	0	0	0	1	1	0	0	0	1	0	0	0	0	0
	ORTHOMCL9295	2,3-bisphosphoglycerate-independent phosphoglycerate mutase( EC:5.4.2.1 )	0	0	0	0	0	0	0	0	1	1	0	0	0	1	0	0	0	0	0
	ORTHOMCL9296	Membrane protein TerC, possibly involved in tellurium resistance	0	0	0	0	0	0	0	0	1	1	0	0	0	1	0	0	0	0	0
	ORTHOMCL9297	hypothetical protein	0	0	0	0	0	0	0	0	0	0	1	0	0	1	0	0	0	0	1
	ORTHOMCL9303	Uncharacterized conserved protein	0	0	0	0	0	0	0	0	0	0	0	0	0	1	1	1	0	0	0
	ORTHOMCL9305	hypothetical protein	0	0	0	0	0	0	0	0	0	1	1	0	0	1	0	0	0	0	0
	ORTHOMCL9308	hypothetical protein	0	0	0	0	0	0	1	0	0	0	0	0	0	1	0	1	0	0	0
	ORTHOMCL9325	Acyl-CoA dehydrogenases	0	0	0	0	0	0	0	0	1	0	1	0	0	1	0	0	0	0	0
	ORTHOMCL9326	Acyl-CoA dehydrogenases( EC:1.3.99.3 )	0	0	0	0	0	0	0	0	1	0	1	0	0	1	0	0	0	0	0
	ORTHOMCL9327	Acyl-CoA dehydrogenases( EC:1.3.99.3 )	0	0	0	0	0	0	0	0	1	0	1	0	0	1	0	0	0	0	0
	ORTHOMCL9334	hypothetical protein	0	0	0	0	1	1	0	0	0	0	0	0	0	1	0	0	0	0	0
	ORTHOMCL9343	hypothetical protein	0	0	0	0	0	0	0	1	0	0	1	0	1	0	0	0	0	0	0
	ORTHOMCL9350	hypothetical protein	0	0	0	0	0	0	0	0	0	0	0	0	1	0	0	0	1	1	0
	ORTHOMCL9352	hypothetical protein	0	0	0	0	0	0	0	1	0	0	0	0	1	0	0	0	0	0	1
	ORTHOMCL9353	ABC-type nitrate/sulfonate/bicarbonate transport systems, periplasmic components	0	0	0	0	0	0	0	0	0	0	0	0	1	0	0	1	0	1	0
	ORTHOMCL9355	hypothetical protein	0	0	0	0	1	1	0	0	0	0	0	0	1	0	0	0	0	0	0
	ORTHOMCL9356	ABC-type sugar transport system, periplasmic component	0	0	0	0	0	0	0	0	0	0	1	0	1	0	0	0	0	0	1
	ORTHOMCL9357	Protein involved in biosynthesis of mitomycin antibiotics/polyketide fumonisin	0	0	0	0	0	0	0	0	0	0	1	0	1	0	0	0	0	0	1
	ORTHOMCL9358	Dehydrogenases with different specificities (related to short-chain alcohol dehydrogenases)	0	0	0	0	0	0	0	0	0	0	1	0	1	0	0	0	0	0	1
	ORTHOMCL9359	ABC-type sugar transport system, periplasmic component	0	0	0	0	0	0	0	0	0	0	1	0	1	0	0	0	0	0	1
	ORTHOMCL9360	Predicted dehydrogenases and related proteins( EC:1.1.1.18 )	0	0	0	0	0	0	0	0	0	0	1	0	1	0	0	0	0	0	1
	ORTHOMCL9363	hypothetical protein	0	0	0	0	1	1	0	0	0	0	0	0	1	0	0	0	0	0	0
	ORTHOMCL9364	Archaeal ATPase.	0	0	0	0	0	0	0	0	0	0	0	0	1	1	0	1	0	0	0
	ORTHOMCL9365	alkylhydroperoxidase AhpD family core domain	0	0	0	0	0	0	0	0	0	0	0	0	1	0	1	0	0	0	1
	ORTHOMCL9366	hypothetical protein	0	0	0	0	0	0	0	0	0	0	0	0	1	0	1	0	0	0	1
	ORTHOMCL9367	Uncharacterized protein conserved in bacteria	0	0	0	0	0	0	0	0	1	0	0	0	1	0	0	1	0	0	0
	ORTHOMCL9368	hypothetical protein	0	0	0	0	1	1	0	0	0	0	0	0	1	0	0	0	0	0	0
	ORTHOMCL9369	hypothetical protein	0	0	0	0	0	0	1	0	0	0	0	0	1	0	0	0	0	0	1
	ORTHOMCL9370	hypothetical protein	0	0	0	0	0	0	0	0	0	1	0	0	1	0	0	1	0	0	0
	ORTHOMCL9371	Exonuclease I( EC:3.1.11.1 )	0	0	0	0	0	0	0	0	0	1	0	0	1	0	0	0	0	0	1
	ORTHOMCL9374	hypothetical protein	0	0	0	0	0	0	0	0	0	1	0	0	1	0	0	0	0	0	1
	ORTHOMCL9378	Glycosyltransferase	0	0	0	0	0	0	0	0	0	0	0	0	1	0	0	1	0	0	1
	ORTHOMCL9381	Uncharacterized protein conserved in bacteria	0	0	0	0	0	0	0	0	0	0	0	0	1	0	0	1	0	0	1
	ORTHOMCL9383	hypothetical protein	0	0	0	0	0	0	1	1	0	0	0	0	1	0	0	0	0	0	0
	ORTHOMCL9384	hypothetical protein	0	0	0	0	0	0	0	0	0	0	1	0	1	0	0	0	0	1	0
	ORTHOMCL9386	hypothetical protein	0	0	0	0	0	0	0	0	0	0	1	0	1	0	0	0	0	1	0
	ORTHOMCL9390	hypothetical protein	0	0	0	0	0	0	0	0	0	0	0	0	1	1	0	1	0	0	0
	ORTHOMCL9391	hypothetical protein	0	0	0	0	0	0	0	1	0	0	0	0	1	0	0	1	0	0	0
	ORTHOMCL9392	Protein of unknown function (DUF2931).	0	0	0	0	0	0	0	0	0	0	0	0	1	1	0	0	0	1	0
	ORTHOMCL9394	Transcriptional regulator	0	0	0	0	0	0	0	0	0	1	0	0	1	1	0	0	0	0	0
	ORTHOMCL9396	Acyl-CoA synthetases (AMP-forming)/AMP-acid ligases II	0	0	0	0	1	1	0	0	0	0	0	0	1	0	0	0	0	0	0
	ORTHOMCL9397	hypothetical protein	0	0	0	0	1	1	0	0	0	0	0	0	1	0	0	0	0	0	0
	ORTHOMCL9398	hypothetical protein	0	0	0	0	0	0	0	0	0	0	0	0	1	0	1	0	0	0	1
	ORTHOMCL9400	hypothetical protein	0	0	0	0	0	0	1	1	0	0	0	0	0	0	0	0	0	0	0
	ORTHOMCL9427	Fatty acid desaturase	0	0	0	0	1	1	0	0	0	0	0	0	0	0	0	0	0	0	0
	ORTHOMCL9428	ATP-dependent transcriptional regulator	0	0	0	0	0	0	0	0	1	0	1	0	0	0	0	0	0	0	0
	ORTHOMCL9429	Choline dehydrogenase and related flavoproteins	0	0	0	0	0	0	0	0	1	0	1	0	0	0	0	0	0	0	0
	ORTHOMCL9430	NAD-dependent aldehyde dehydrogenases( EC:1.2.1.68 )	0	0	0	0	0	0	0	0	1	0	1	0	0	0	0	0	0	0	0
	ORTHOMCL9431	Dehydrogenases with different specificities (related to short-chain alcohol dehydrogenases)( EC:1.1.1.100 )	0	0	0	0	0	0	0	0	1	0	1	0	0	0	0	0	0	0	0
	ORTHOMCL9432	Acyl dehydratase	0	0	0	0	0	0	0	0	1	0	1	0	0	0	0	0	0	0	0
	ORTHOMCL9433	Acyl dehydratase	0	0	0	0	0	0	0	0	1	0	1	0	0	0	0	0	0	0	0
	ORTHOMCL9434	Acetyl-CoA acetyltransferase	0	0	0	0	0	0	0	0	1	0	1	0	0	0	0	0	0	0	0
	ORTHOMCL9435	AraC-type DNA-binding domain-containing proteins	0	0	0	0	0	0	0	0	1	0	1	0	0	0	0	0	0	0	0
	ORTHOMCL9437	hypothetical protein	0	0	0	0	0	0	0	0	0	0	1	0	0	0	1	0	0	0	0
	ORTHOMCL9457	hypothetical protein	0	0	0	0	0	0	0	0	0	0	0	0	0	0	0	0	1	1	0
	ORTHOMCL9458	hypothetical protein	0	0	0	0	0	0	0	0	0	0	0	0	0	0	0	0	1	1	0
	ORTHOMCL9462	hypothetical protein	0	0	0	0	0	0	0	1	0	0	0	0	0	0	0	1	0	0	0
	ORTHOMCL9474	AraC-type DNA-binding domain-containing proteins	0	0	0	0	0	0	0	1	0	0	0	0	0	1	0	0	0	0	0
	ORTHOMCL9502	hypothetical protein	0	0	0	0	1	1	0	0	0	0	0	0	0	0	0	0	0	0	0
	ORTHOMCL9512	Glycine/D-amino acid oxidases (deaminating)	0	0	0	0	0	0	0	0	0	0	0	0	0	1	1	0	0	0	0
	ORTHOMCL9515	Flavodoxin reductases (ferredoxin-NADPH reductases) family 1( EC:1.14.13.82 )	0	0	0	0	1	1	0	0	0	0	0	0	0	0	0	0	0	0	0
	ORTHOMCL9516	Phenylpropionate dioxygenase and related ring-hydroxylating dioxygenases, large terminal subunit	0	0	0	0	1	1	0	0	0	0	0	0	0	0	0	0	0	0	0
	ORTHOMCL9517	Small subunit of phenylpropionate dioxygenase	0	0	0	0	1	1	0	0	0	0	0	0	0	0	0	0	0	0	0
	ORTHOMCL9519	hypothetical protein	0	0	0	0	0	0	0	0	1	0	0	1	0	0	1	0	0	0	0
	ORTHOMCL9520	Outer membrane protein/protective antigen OMA87	0	0	0	0	0	0	0	0	0	0	0	1	0	0	0	1	0	0	1
	ORTHOMCL9521	hypothetical protein	0	0	0	0	0	0	0	0	0	0	0	1	1	0	0	1	0	0	0
	ORTHOMCL9522	Rieske [2Fe-2S] domain.	0	0	0	0	0	0	0	0	0	0	0	1	1	0	0	1	0	0	0
	ORTHOMCL9523	hypothetical protein	0	0	0	0	0	0	0	0	0	0	0	1	1	0	0	1	0	0	0
	ORTHOMCL9524	Terpene synthase family, metal binding domain.	0	0	0	0	0	0	0	0	0	0	0	1	1	0	0	1	0	0	0
	ORTHOMCL9525	ABC-type nitrate/sulfonate/bicarbonate transport systems, periplasmic components	0	0	0	0	0	0	0	0	0	0	0	1	0	0	0	1	0	0	1
	ORTHOMCL9526	nitrate ABC transporter, permease protein	0	0	0	0	0	0	0	0	0	0	0	1	0	0	0	1	0	0	1
	ORTHOMCL9527	nitrate transport ATP-binding subunits C and D	0	0	0	0	0	0	0	0	0	0	0	1	0	0	0	1	0	0	1
	ORTHOMCL9528	hypothetical protein	0	0	0	0	0	0	0	0	0	0	0	1	0	0	0	1	0	0	1
	ORTHOMCL9529	hypothetical protein	0	0	0	0	0	0	0	0	0	0	0	1	0	0	0	1	0	0	1
	ORTHOMCL9530	hypothetical protein	0	0	0	0	0	0	0	0	0	0	0	1	0	0	0	1	0	0	1
	ORTHOMCL9533	hypothetical protein	0	0	0	0	0	0	0	0	0	0	0	1	0	0	0	1	0	1	0
	ORTHOMCL9534	hypothetical protein	0	0	0	0	0	0	0	0	0	0	0	1	1	0	0	0	0	0	1
	ORTHOMCL9536	hypothetical protein	0	0	0	0	0	0	0	0	0	0	0	1	0	0	0	1	0	1	0
	ORTHOMCL9537	hypothetical protein	0	0	0	0	0	0	0	0	0	0	0	1	0	0	1	0	0	0	1
	ORTHOMCL9538	Uncharacterized conserved protein	0	0	0	0	0	0	0	0	0	0	0	1	0	0	0	1	0	0	1
	ORTHOMCL9541	Methyl-accepting chemotaxis protein	0	0	0	0	0	0	0	0	0	1	0	1	0	0	1	0	0	0	0
	ORTHOMCL9542	Selenocysteine lyase	0	0	0	0	0	0	0	0	0	1	0	1	0	0	1	0	0	0	0
	ORTHOMCL9543	twin arginine-targeting protein translocase, TatA/E family	0	0	0	0	0	0	0	0	0	1	0	1	0	0	1	0	0	0	0
	ORTHOMCL9545	Nitrile hydratase, alpha chain.	0	0	0	0	0	0	0	0	0	0	0	1	1	0	0	1	0	0	0
	ORTHOMCL9546	Acetyltransferases	0	0	0	0	0	0	0	0	0	0	0	1	1	0	0	1	0	0	0
	ORTHOMCL9547	hypothetical protein	0	0	0	0	0	0	0	0	0	0	0	1	1	0	0	1	0	0	0
	ORTHOMCL9548	SagB-type dehydrogenase domain	0	0	0	0	0	0	0	0	0	0	0	1	1	0	0	1	0	0	0
	ORTHOMCL9551	hypothetical protein	0	0	0	0	1	1	0	0	0	0	0	1	0	0	0	0	0	0	0
	ORTHOMCL9558	hypothetical protein	0	0	0	0	0	0	0	0	0	0	0	1	0	0	0	1	0	0	1
	ORTHOMCL9559	hypothetical protein	0	0	0	0	0	0	0	0	0	0	0	1	0	1	0	1	0	0	0
	ORTHOMCL9560	Methyl-accepting chemotaxis protein	0	0	0	0	0	0	0	0	1	0	0	1	0	0	1	0	0	0	0
	ORTHOMCL9561	Ion channel.	0	0	0	0	0	0	0	0	0	0	0	1	1	0	0	1	0	0	0
	ORTHOMCL9568	Signal transduction histidine kinase	0	0	0	0	0	0	0	0	0	0	0	1	1	0	0	1	0	0	0
	ORTHOMCL9570	hypothetical protein	0	0	0	0	0	0	0	1	0	0	0	1	0	0	0	1	0	0	0
	ORTHOMCL9571	Stress-induced bacterial acidophilic repeat motif.	0	0	0	0	0	0	0	0	0	0	0	1	0	0	0	1	0	0	1
	ORTHOMCL9579	hypothetical protein	0	0	0	0	0	0	0	0	0	0	0	1	0	0	0	1	0	0	1
	ORTHOMCL9580	hypothetical protein	0	0	0	0	0	0	0	0	0	0	0	1	0	0	0	1	0	0	1
	ORTHOMCL9581	hypothetical protein	0	0	0	0	0	0	0	0	0	0	0	1	0	0	0	1	0	0	1
	ORTHOMCL9582	hypothetical protein	0	0	0	0	0	0	0	0	0	0	0	1	0	0	0	1	0	1	0
	ORTHOMCL9583	hypothetical protein	0	0	0	0	0	0	0	0	0	0	0	1	0	0	0	1	0	0	1
	ORTHOMCL9584	hypothetical protein	0	0	0	0	0	0	0	0	0	0	0	1	0	0	0	0	1	1	0
	ORTHOMCL9594	Pyruvate-formate lyase-activating enzyme( EC:1.97.1.4 )	0	0	0	0	0	0	0	0	0	0	0	1	0	0	0	1	0	0	1
	ORTHOMCL9596	Arabinose efflux permease	0	0	0	0	0	0	0	0	0	0	0	1	0	0	0	1	0	0	1
	ORTHOMCL9597	Putative threonine efflux protein	0	0	0	0	0	0	0	0	0	0	0	1	0	0	0	1	0	0	0
	ORTHOMCL9598	Predicted permeases	0	0	0	0	0	0	0	0	0	0	0	1	0	0	0	0	0	0	1
	ORTHOMCL9599	Probable taurine catabolism dioxygenase	0	0	0	0	0	0	0	0	0	0	0	1	0	0	0	1	0	0	1
	ORTHOMCL9600	Phosphodiesterase/alkaline phosphatase D	0	0	0	0	0	0	0	0	0	0	0	1	0	0	0	1	0	0	1
	ORTHOMCL9603	Protein of unknown function (DUF1302).	0	0	0	0	0	0	0	0	0	0	0	1	1	0	0	1	0	0	0
	ORTHOMCL9604	hypothetical protein	0	0	0	0	0	0	0	0	0	0	0	1	0	0	0	1	0	0	1
	ORTHOMCL9605	Predicted metalloprotease	0	0	0	0	0	0	0	0	0	0	1	1	0	0	0	1	0	0	0
	ORTHOMCL9606	hypothetical protein	0	0	0	0	0	0	0	0	0	0	1	1	0	1	0	0	0	0	0
	ORTHOMCL9607	Arabinose efflux permease	0	0	0	0	0	0	0	0	0	0	0	1	0	0	0	1	0	0	0
	ORTHOMCL9608	hypothetical protein	0	0	0	0	0	0	0	0	0	0	0	1	0	0	0	1	0	0	1
	ORTHOMCL5703	dipeptide ABC transporter, periplasmic dipeptide-binding protein, putative	0	0	0	0	0	0	0	2	0	0	2	0	0	0	0	2	0	0	0
	ORTHOMCL5995	Transcriptional regulator	0	0	0	0	1	1	0	0	0	0	0	0	0	0	0	0	1	3	0
	ORTHOMCL6423	hypothetical protein	0	0	0	0	0	0	0	0	1	0	3	0	0	1	0	0	0	0	0
	ORTHOMCL6892	hypothetical protein	0	0	0	0	0	0	0	0	0	0	0	2	0	0	0	2	0	0	2
	ORTHOMCL5078	2-keto-4-pentenoate hydratase/2-oxohepta-3-ene-1,7-dioic acid hydratase (catechol pathway)	0	1	1	1	0	0	0	0	0	2	0	0	0	0	1	1	0	0	1
	ORTHOMCL5609	Chain length determinant protein	0	1	1	1	0	0	0	0	1	2	0	1	0	1	0	0	0	0	0
	ORTHOMCL4023	Antibiotic biosynthesis monooxygenase	1	0	0	0	1	1	1	1	0	0	1	0	0	1	2	0	1	1	0
	ORTHOMCL4207	TonB-dependent receptor	1	0	0	0	1	1	1	1	0	0	2	1	1	0	0	1	1	1	0
	ORTHOMCL5174	4-hydroxy-2-oxovalerate aldolase( EC:4.1.3.39 )	1	1	2	2	0	0	0	0	1	1	1	0	1	0	1	0	0	0	0
	ORTHOMCL5175	acetaldehyde dehydrogenase (acetylating)( EC:1.2.1.10 )	1	1	2	2	0	0	0	0	1	1	1	0	1	0	1	0	0	0	0
	ORTHOMCL5601	ISPsy26, transposase orfA	1	0	1	0	0	0	0	0	0	0	0	0	0	0	0	0	0	0	0
	ORTHOMCL6325	hypothetical protein	0	1	1	1	0	0	0	0	1	0	0	0	0	0	0	0	0	0	0
	ORTHOMCL7074	maleylacetoacetate isomerase( EC:5.2.1.2 )	0	1	1	1	0	0	0	0	0	1	0	0	0	0	0	0	0	0	0
	ORTHOMCL7075	Arabinose efflux permease	0	1	1	1	0	0	0	0	0	1	0	0	0	0	0	0	0	0	0
	ORTHOMCL7076	Transcriptional regulator	0	1	1	1	0	0	0	0	0	1	0	0	0	0	0	0	0	0	0
	ORTHOMCL7137	AraC-type DNA-binding domain-containing proteins	0	1	1	1	0	0	0	0	1	0	0	0	0	0	0	0	0	0	0
	ORTHOMCL7174	ABC-type spermidine/putrescine transport system, permease component II	0	1	1	1	0	0	0	0	1	0	0	0	0	0	0	0	0	0	0
	ORTHOMCL7175	ABC-type spermidine/putrescine transport system, permease component I	0	1	1	1	0	0	0	0	1	0	0	0	0	0	0	0	0	0	0
	ORTHOMCL7176	Spermidine/putrescine-binding periplasmic protein	0	1	1	1	0	0	0	0	1	0	0	0	0	0	0	0	0	0	0
	ORTHOMCL7177	spermidine/putrescine ABC transporter ATP-binding subunit	0	1	1	1	0	0	0	0	1	0	0	0	0	0	0	0	0	0	0
	ORTHOMCL7178	Transcriptional regulator	0	1	1	1	0	0	0	0	1	0	0	0	0	0	0	0	0	0	0
	ORTHOMCL7179	Thiamine pyrophosphate-requiring enzymes [acetolactate synthase, pyruvate dehydrogenase (cytochrome), glyoxylate carboligase, phosphonopyruvate decarboxylase]( EC:2.2.1.6 )	0	1	1	1	0	0	0	0	1	0	0	0	0	0	0	0	0	0	0
	ORTHOMCL7180	Predicted metal-dependent hydrolase with the TIM-barrel fold	0	1	1	1	0	0	0	0	1	0	0	0	0	0	0	0	0	0	0
	ORTHOMCL7181	Putative GTPases (G3E family)	0	1	1	1	0	0	0	0	1	0	0	0	0	0	0	0	0	0	0
	ORTHOMCL7232	Arabinose efflux permease	1	0	0	1	0	0	0	0	0	0	1	0	0	0	0	0	0	0	0
	ORTHOMCL7342	Malate/lactate dehydrogenases( EC:1.1.1.37 )	0	1	1	0	0	0	0	0	0	0	0	0	1	0	0	0	0	0	0
	ORTHOMCL7632	Nucleoside-diphosphate-sugar epimerases	0	1	1	0	0	0	0	0	0	1	0	0	0	0	0	0	0	0	0
	ORTHOMCL7670	Hg(II)-responsive transcriptional regulator	0	1	1	1	0	0	0	0	0	1	0	0	0	0	0	0	0	0	0
	ORTHOMCL7842	hypothetical protein	0	1	1	1	0	0	0	0	0	1	0	0	0	0	0	0	0	0	0
	ORTHOMCL7852	Response regulator containing CheY-like receiver, AAA-type ATPase, and DNA-binding domains	0	1	1	1	0	0	0	0	0	1	0	0	0	0	0	0	0	0	0
	ORTHOMCL7862	Uncharacterized protein conserved in bacteria	0	1	1	1	0	0	0	0	0	1	0	0	0	0	0	0	0	0	0
	ORTHOMCL7866	ABC-type branched-chain amino acid transport systems, periplasmic component	0	1	1	1	0	0	0	0	0	0	1	0	0	0	0	0	0	0	0
	ORTHOMCL7867	ABC-type branched-chain amino acid transport systems, ATPase component	0	1	1	1	0	0	0	0	0	0	1	0	0	0	0	0	0	0	0
	ORTHOMCL7868	ABC-type branched-chain amino acid transport systems, ATPase component	0	1	1	1	0	0	0	0	0	0	1	0	0	0	0	0	0	0	0
	ORTHOMCL7869	Branched-chain amino acid ABC-type transport system, permease components	0	1	1	1	0	0	0	0	0	0	1	0	0	0	0	0	0	0	0
	ORTHOMCL7870	ABC-type branched-chain amino acid transport system, permease component	0	1	1	1	0	0	0	0	0	0	1	0	0	0	0	0	0	0	0
	ORTHOMCL7871	Transcriptional regulator	0	1	1	1	0	0	0	0	0	0	1	0	0	0	0	0	0	0	0
	ORTHOMCL7872	hypothetical protein	0	1	1	1	0	0	0	0	0	0	1	0	0	0	0	0	0	0	0
	ORTHOMCL7873	hypothetical protein	0	1	1	1	0	0	0	0	0	0	1	0	0	0	0	0	0	0	0
	ORTHOMCL7874	NAD-dependent aldehyde dehydrogenases	0	1	1	1	0	0	0	0	0	0	1	0	0	0	0	0	0	0	0
	ORTHOMCL7875	Uncharacterized protein conserved in bacteria	0	1	1	1	0	0	0	0	0	0	1	0	0	0	0	0	0	0	0
	ORTHOMCL7876	Ferredoxin subunits of nitrite reductase and ring-hydroxylating dioxygenases	0	1	1	1	0	0	0	0	0	0	1	0	0	0	0	0	0	0	0
	ORTHOMCL7939	Threonine aldolase( EC:4.1.2.5 )	0	1	1	1	0	0	0	0	1	0	0	0	0	0	0	0	0	0	0
	ORTHOMCL7972	Protein of unknown function (DUF3313).	0	1	1	1	0	0	0	0	1	0	0	0	0	0	0	0	0	0	0
	ORTHOMCL7973	NTP pyrophosphohydrolases including oxidative damage repair enzymes( EC:3.6.1.- )	0	1	1	1	0	0	0	0	1	0	0	0	0	0	0	0	0	0	0
	ORTHOMCL7981	AraC-type DNA-binding domain-containing proteins	0	1	1	1	0	0	0	0	1	0	0	0	0	0	0	0	0	0	0
	ORTHOMCL7982	Transcriptional regulator	0	1	1	1	0	0	0	0	1	0	0	0	0	0	0	0	0	0	0
	ORTHOMCL7983	AraC-type DNA-binding domain-containing proteins	0	1	1	1	0	0	0	0	1	0	0	0	0	0	0	0	0	0	0
	ORTHOMCL7988	hypothetical protein	0	1	1	1	0	0	0	0	1	0	0	0	0	0	0	0	0	0	0
	ORTHOMCL7989	hypothetical protein	0	1	1	1	0	0	0	0	1	0	0	0	0	0	0	0	0	0	0
	ORTHOMCL8001	hypothetical protein	0	1	1	1	0	0	0	0	1	0	0	0	0	0	0	0	0	0	0
	ORTHOMCL8040	hypothetical protein	1	1	0	0	0	0	1	0	0	0	0	0	0	0	0	0	0	0	0
	ORTHOMCL8090	hypothetical protein	0	1	1	0	0	0	0	0	0	0	0	0	0	1	0	0	0	0	0
	ORTHOMCL8137	Transcriptional regulator containing an amidase domain and an AraC-type DNA-binding HTH domain	1	1	1	0	0	0	0	0	0	0	0	0	0	1	0	0	0	0	0
	ORTHOMCL8138	Choline dehydrogenase and related flavoproteins( EC:1.1.99.1 )	1	1	1	0	0	0	0	0	0	0	0	0	0	1	0	0	0	0	0
	ORTHOMCL3299	hypothetical protein	1	0	0	0	1	1	1	1	1	1	1	1	0	1	1	1	1	1	1
	ORTHOMCL3300	ompA family protein	1	0	0	0	1	1	1	1	1	1	1	1	0	1	1	1	1	1	1
	ORTHOMCL3311	Ribose-phosphate pyrophosphokinase (RPPK) (Phosphoribosylpyrophosphate synthetase) (P-Rib-PP synthetase) (PRPP synthetase)( EC:2.7.6.1 )	0	1	0	0	1	1	1	1	0	1	1	1	1	1	1	1	1	1	1
	ORTHOMCL3482	hypothetical protein	1	0	0	1	1	1	1	1	1	1	1	1	1	0	1	1	1	1	1
	ORTHOMCL3943	GtrC, putative	1	0	0	1	1	1	1	1	1	1	1	1	1	0	1	1	1	1	1
	ORTHOMCL4060	Uncharacterized conserved protein	1	0	0	1	1	1	1	1	1	1	1	1	0	1	1	1	1	1	1
	ORTHOMCL4109	hypothetical protein	1	0	1	0	1	1	1	1	1	1	1	1	0	1	1	1	1	1	1
	ORTHOMCL4159	Predicted hydrolases or acyltransferases (alpha/beta hydrolase superfamily)	1	0	0	1	1	1	1	1	1	1	1	1	1	0	1	1	1	1	1
	ORTHOMCL4184	Predicted membrane protein	1	1	0	0	1	1	1	1	1	1	1	1	0	1	1	1	1	1	1
	ORTHOMCL4323	Uncharacterized conserved protein	0	1	1	0	1	1	1	1	1	1	1	1	1	1	1	1	1	1	1
	ORTHOMCL4110	Aerobic-type carbon monoxide dehydrogenase, large subunit CoxL/CutL homologs	0	0	0	0	2	2	0	0	1	2	0	0	0	0	1	0	0	2	0
	ORTHOMCL3777	FMN reductase, MsuE subfamily( EC:1.5.1.29 )	1	0	0	0	1	1	1	1	1	0	1	1	1	0	1	1	1	1	2
	ORTHOMCL3837	Poly(beta-D-mannuronate) C5 epimerase 3 (Mannuronanepimerase 3)	0	0	1	1	1	1	1	1	1	1	1	1	1	1	1	2	0	1	1
	ORTHOMCL4507	hypothetical protein	0	1	1	1	0	0	1	0	1	1	0	0	1	0	1	0	0	0	0
	ORTHOMCL4574	UDP-N-acetylglucosamine 2-epimerase( EC:5.1.3.14 )	1	2	1	0	0	0	1	0	0	0	0	0	0	1	1	0	1	1	0
	ORTHOMCL5120	Response regulator	2	1	1	1	0	0	1	0	0	0	1	0	0	0	1	1	0	0	1
	ORTHOMCL6690	NAD-dependent aldehyde dehydrogenases( EC:1.2.1.3 )	0	0	0	0	0	0	0	0	2	2	1	0	0	0	0	0	0	0	0
	ORTHOMCL3387	hypothetical protein	1	0	1	0	1	1	3	2	2	0	1	1	2	1	2	1	1	1	0
	ORTHOMCL3606	quinate/shikimate dehydrogenase( EC:1.1.5.8 )	1	0	0	0	1	1	1	1	2	1	2	0	1	0	0	1	1	1	1
	ORTHOMCL4564	transcriptional regulator, LuxR family	0	1	2	1	0	0	0	0	1	2	2	0	0	0	0	0	0	0	0
	ORTHOMCL5330	hypothetical protein	0	0	0	0	0	0	0	0	0	1	2	0	0	0	0	0	6	2	0
	ORTHOMCL3628	CAIB/BAIF family protein	1	1	2	1	0	0	0	1	1	2	1	1	1	0	1	1	1	1	1
	ORTHOMCL5864	autoinducer synthesis protein AhlI	0	0	0	0	0	0	1	0	0	0	0	0	1	0	0	0	0	0	0
	ORTHOMCL6234	homoprotocatechuate degradation operon regulator, HpaR	0	0	0	0	0	0	0	0	0	0	1	2	0	0	0	0	0	0	0
	ORTHOMCL6392	2-oxoacid:ferredoxin/flavodoxin oxidoreductase subunit family protein( EC:1.2.7.8 )	0	0	0	0	1	1	0	0	0	0	0	0	0	2	0	0	0	0	0
	ORTHOMCL7372	Predicted transcriptional regulator	0	0	0	0	0	0	0	0	0	2	1	0	0	0	0	0	0	0	0
	ORTHOMCL7383	Dehydrogenases with different specificities (related to short-chain alcohol dehydrogenases)	0	0	0	0	0	0	0	0	0	0	1	0	0	2	0	0	0	0	0
	ORTHOMCL7401	Glycine/serine hydroxymethyltransferase( EC:2.1.2.1 )	0	0	0	0	1	1	0	0	0	0	0	0	0	0	0	0	0	0	0
	ORTHOMCL8089	Glycosyltransferase	0	0	0	0	1	1	0	0	0	0	0	0	0	2	0	0	0	0	0
	ORTHOMCL8144	Acyl dehydratase	0	0	0	0	0	0	0	0	1	0	2	0	0	1	0	0	0	0	0
	ORTHOMCL8145	Acyl dehydratase	0	0	0	0	0	0	0	0	1	0	2	0	0	1	0	0	0	0	0
	ORTHOMCL8146	Dehydrogenases with different specificities (related to short-chain alcohol dehydrogenases)( EC:1.1.1.100 )	0	0	0	0	0	0	0	0	1	0	2	0	0	1	0	0	0	0	0
	ORTHOMCL8163	hypothetical protein	0	0	0	0	0	0	0	0	0	0	0	0	2	0	0	1	0	0	1
	ORTHOMCL1389	vanillate monooxygenase, oxidoreductase subunit( EC:1.14.13.82 )	0	0	1	1	1	1	0	1	1	1	2	1	1	4	0	1	1	1	1
	ORTHOMCL3634	tail fiber protein H, putative	1	0	0	1	1	1	1	2	1	1	1	0	0	0	1	1	1	2	0
	ORTHOMCL5121	Uncharacterized protein, possibly involved in aromatic compounds catabolism	1	1	1	1	1	1	0	1	0	1	0	0	0	0	0	0	1	1	0
	ORTHOMCL5122	Transcriptional regulator	1	1	1	1	1	1	0	1	0	1	0	0	0	0	0	0	1	1	0
	ORTHOMCL5374	Transcriptional regulator	1	1	1	1	0	0	1	0	1	1	0	0	0	0	0	0	1	1	0
	ORTHOMCL5428	RNA polymerase sigma factor, sigma-70 family	1	1	1	1	0	0	0	0	0	1	0	1	0	0	1	1	0	0	1
	ORTHOMCL5117	Transcriptional regulator	0	1	1	1	1	1	1	1	1	1	0	0	0	0	0	0	0	0	0
	ORTHOMCL5556	hypothetical protein	0	1	1	1	0	0	1	0	1	1	1	0	0	1	1	0	0	0	0
	ORTHOMCL3834	HNH endonuclease:S-type Pyocin	1	0	0	0	0	0	0	1	1	0	1	1	1	1	0	1	1	0	1
	ORTHOMCL4365	hypothetical protein	1	0	0	0	1	1	0	0	0	0	0	1	1	0	1	1	1	1	1
	ORTHOMCL4468	hypothetical protein	0	0	0	0	1	1	0	0	0	0	1	1	1	0	1	1	1	1	0
	ORTHOMCL4501	hypothetical protein	1	0	0	0	1	1	1	1	1	0	1	0	0	0	1	0	1	1	0
	ORTHOMCL4502	sensor histidine kinase	0	0	0	0	1	1	1	1	0	0	0	1	1	1	1	1	0	0	1
	ORTHOMCL4506	haloacid dehalogenase, type II( EC:3.8.1.2 )	1	0	0	0	1	1	0	0	0	1	1	1	1	0	1	0	1	1	1
	ORTHOMCL4544	tartrate transporter, putative	1	0	0	0	1	1	0	1	0	1	0	1	1	0	1	1	1	1	0
	ORTHOMCL4690	hypothetical protein	1	0	0	0	0	0	1	1	0	0	0	1	1	1	1	1	1	0	1
	ORTHOMCL4702	NADH:flavin oxidoreductase/NADH oxidase family protein( EC:1.- )	1	0	0	0	1	1	0	1	0	0	0	1	1	0	1	1	1	1	1
	ORTHOMCL4732	Glutathione S-transferase( EC:2.5.1.18 )	1	0	0	0	1	1	0	1	0	0	0	1	1	1	1	1	0	0	1
	ORTHOMCL4736	virulence-associated protein, putative	0	1	0	0	0	0	1	1	1	0	1	1	1	1	0	1	1	0	1
	ORTHOMCL4900	Transcriptional regulators	1	0	0	0	1	1	1	0	1	0	0	0	1	0	1	1	1	1	0
	ORTHOMCL5016	hypothetical protein	1	0	0	0	1	1	1	1	0	0	1	1	0	0	1	1	0	0	1
	ORTHOMCL5024	hypothetical protein	1	0	0	0	1	1	1	1	1	0	0	1	1	1	0	1	0	0	1
	ORTHOMCL5100	Mannose-6-phosphate isomerase	1	0	0	0	1	1	1	1	0	1	0	0	1	1	1	0	1	1	0
	ORTHOMCL5103	hypothetical protein	1	0	0	0	1	1	1	1	1	0	0	0	1	0	0	1	1	1	0
	ORTHOMCL5200	MAPEG family.	0	0	1	0	0	0	0	0	1	1	1	1	1	1	1	0	1	1	1
	ORTHOMCL5213	hypothetical protein	0	1	0	0	1	1	1	0	0	0	1	1	1	1	1	1	0	0	1
	ORTHOMCL5221	adenylylsulfate kinase (apsK)( EC:2.7.7.4,EC:2.7.1.25,EC:2.7.1.25 )	1	0	0	0	0	0	0	1	0	1	0	1	1	0	1	1	1	1	1
	ORTHOMCL5766	succinate-semialdehyde dehydrogenase (NADP+)( EC:1.2.1.16 )	1	1	2	0	0	0	0	0	0	1	0	0	0	0	0	0	0	0	0
	ORTHOMCL4910	Putative transcription activator	1	0	0	0	1	1	0	0	2	0	1	0	0	1	0	0	1	1	1
	ORTHOMCL5265	hypothetical protein	0	1	0	0	0	0	0	1	0	0	0	1	2	1	1	1	1	1	1
	ORTHOMCL5443	Proline racemase	0	0	0	1	0	0	0	0	1	0	1	1	1	1	0	1	1	1	2
	ORTHOMCL6121	Transcriptional regulator	1	0	1	0	0	0	0	0	0	0	1	0	0	0	0	0	0	0	0
	ORTHOMCL6633	gentisate 1,2-dioxygenase( EC:1.13.11.4 )	0	1	1	1	0	0	0	0	0	1	1	0	0	0	0	0	0	0	0
	ORTHOMCL6676	NAD-dependent aldehyde dehydrogenases( EC:1.2.1.3 )	0	1	1	1	0	0	0	0	1	0	0	0	0	0	1	0	0	0	0
	ORTHOMCL6678	hypothetical protein	0	1	1	1	0	0	0	0	1	1	0	0	0	0	0	0	0	0	0
	ORTHOMCL6679	hypothetical protein	0	1	1	1	0	0	0	0	1	1	0	0	0	0	0	0	0	0	0
	ORTHOMCL6680	hypothetical protein	0	1	1	1	0	0	0	0	1	1	0	0	0	0	0	0	0	0	0
	ORTHOMCL6751	2-polyprenyl-6-methoxyphenol hydroxylase and related FAD-dependent oxidoreductases	0	1	1	1	0	0	0	0	0	1	0	0	0	1	0	0	0	0	0
[truncated: 9,280 more rows]

## Sheet: PhenotypesAndStatisticalTest
	Activity	GM25	GM48	GM49	GM74		GM16	GM18	GM21	GM24	GM30	GM33	GM41	GM50	GM55	GM60	GM67	GM78	GM79	GM80	GM102		Contingency Table	rhizosphere	endosphere	negative	total		Expected Values	rhizosphere	endosphere	negative	total			Differences
[truncated: 14 more rows]

[truncated: 3 more sheets: PathwaysAndStatisticalTest, StatsRandomSubsets, GenomeAccessionAndStrainInfo]
